# Supplementary material for: Fanconi Anemia Pathway Genes Advance Cervical Cancer via Immune Regulation and Cell Adhesion
Source: Front Cell Dev Biol. 2021 Nov 15;9:734794. doi: 10.3389/fcell.2021.734794 (PMC8634638; doi:10.3389/fcell.2021.734794)
Supplement: Supplementary file 1 [file Table2.XLSX]

## Sheet: Sheet1
Data1. HPV_diffRNAs (DESeq2)
id	baseMean	log2FoldChange	lfcSE	stat	pvalue	padj
NKD1	686.234	6.25593	0.342514	18.2647	1.58e-74	2.96e-70
LINC01314	37.1119	6.10822	0.360206	16.9575	1.69e-64	1.59e-60
SEZ6L	100.055	8.11733	0.503246	16.1299	1.57e-58	9.82e-55
TPH1	51.3964	4.66134	0.29615	15.7398	8.07e-56	3.78e-52
LIX1	37.2192	8.03503	0.538394	14.9241	2.3e-50	8.61e-47
DPEP1	262.826	6.50365	0.457264	14.223	6.6e-46	2.06e-42
COL26A1	129.36	5.83863	0.422392	13.8228	1.86e-43	4.97e-40
CITED1	35.3068	4.13176	0.30255	13.6564	1.85e-42	4.33e-39
CYP17A1	12.7377	3.9888	0.293286	13.6004	3.98e-42	8.29e-39
NOTUM	1074.74	6.88681	0.512159	13.4466	3.22e-41	6.04e-38
GPR83	30.9418	4.6339	0.345004	13.4315	3.96e-41	6.74e-38
CHRM5	9.8452	3.58712	0.272294	13.1737	1.24e-39	1.82e-36
MYH7B	203.458	3.58176	0.27191	13.1726	1.26e-39	1.82e-36
AXIN2	593.145	4.35063	0.347831	12.5079	6.76e-36	9.05e-33
ACSS3	158.889	4.41427	0.365404	12.0805	1.34e-33	1.67e-30
LY6G6D	25.1929	8.25838	0.689476	11.9778	4.65e-33	5.44e-30
E2F5	396.18	1.88845	0.1597	11.825	2.9e-32	3.2e-29
ZFR2	603.847	-5.89913	0.499987	-11.7986	3.97e-32	4.13e-29
SYCP2	3702.81	-4.01346	0.341493	-11.7527	6.84e-32	6.75e-29
CLDN6	82.3923	6.3133	0.542164	11.6446	2.44e-31	2.29e-28
CA14	64.3201	2.56852	0.221001	11.6222	3.18e-31	2.84e-28
RXRG	24.0476	5.47112	0.475127	11.5151	1.11e-30	9.44e-28
GALNT8	40.6636	5.06174	0.441921	11.454	2.25e-30	1.83e-27
GAL3ST3	10.6318	6.89377	0.609809	11.3048	1.24e-29	9.7e-27
AL662899.2	23.3804	7.49427	0.667452	11.2282	2.97e-29	2.22e-26
LYPD5	1320.96	-3.15436	0.283001	-11.1461	7.48e-29	5.39e-26
AQP8	5.36704	4.16728	0.374253	11.1349	8.48e-29	5.89e-26
NR5A2	174.542	3.40777	0.309808	10.9996	3.84e-28	2.57e-25
THEM5	479.094	-2.78484	0.2534	-10.9899	4.27e-28	2.76e-25
DCT	8.59461	5.27418	0.48196	10.9432	7.16e-28	4.47e-25
AP1S2	1148.91	1.86455	0.170555	10.9323	8.08e-28	4.89e-25
TENM1	68.3083	5.7187	0.527906	10.8328	2.41e-27	1.41e-24
SLC14A2	6.75382	3.79179	0.350648	10.8137	2.97e-27	1.68e-24
ABHD12B	119.886	4.52061	0.418408	10.8043	3.28e-27	1.81e-24
GLRA2	6.03247	5.63192	0.524172	10.7444	6.3e-27	3.37e-24
POU3F2	41.9661	5.48024	0.516152	10.6175	2.47e-26	1.29e-23
CALCB	10.0641	5.46913	0.516051	10.598	3.04e-26	1.54e-23
LAPTM4B	12888.7	1.85705	0.17554	10.5791	3.72e-26	1.84e-23
AMBN	52.6613	10.6998	1.01194	10.5735	3.95e-26	1.9e-23
PLPPR3	11.0271	5.23828	0.497841	10.522	6.84e-26	3.21e-23
PHYH	1201.1	2.63618	0.25085	10.509	7.85e-26	3.59e-23
FGF23	2.75926	6.27069	0.597374	10.4971	8.91e-26	3.97e-23
FGF19	346.803	9.10182	0.869125	10.4724	1.16e-25	5.04e-23
MYOZ3	20.4531	3.07604	0.295793	10.3993	2.5e-25	1.06e-22
CAVIN4	37.2521	2.42681	0.233936	10.3738	3.26e-25	1.36e-22
FAM69B	233.594	3.17803	0.30686	10.3566	3.91e-25	1.59e-22
PCCA	1147.38	1.9958	0.192845	10.3493	4.22e-25	1.68e-22
PKD1L3	8.41215	3.29815	0.318896	10.3424	4.53e-25	1.77e-22
BCL2L10	394.229	-3.86688	0.374635	-10.3217	5.62e-25	2.15e-22
DNAH10	50.0134	3.51519	0.341255	10.3008	6.99e-25	2.62e-22
CELF5	14.319	3.70684	0.363109	10.2086	1.81e-24	6.66e-22
RAD9B	102.258	-2.08746	0.204982	-10.1837	2.35e-24	8.45e-22
FGF20	71.6919	8.95193	0.88228	10.1464	3.44e-24	1.22e-21
SP7	2.27007	4.57618	0.4513	10.14	3.67e-24	1.27e-21
ZNF660	44.3382	2.78788	0.277936	10.0306	1.12e-23	3.81e-21
DGKA	5769.4	-1.87259	0.18844	-9.93736	2.86e-23	9.58e-21
LIN7A	102.119	3.61465	0.363922	9.93248	3.01e-23	9.88e-21
NAT8L	165.199	4.72718	0.4777	9.89571	4.35e-23	1.4e-20
LEF1	731.619	2.94498	0.29927	9.84055	7.53e-23	2.39e-20
CABP7	31.658	2.72263	0.277675	9.80509	1.07e-22	3.34e-20
PTPRO	183.54	3.17476	0.324536	9.78247	1.34e-22	4.11e-20
GRIK5	81.6639	2.97605	0.30538	9.74539	1.93e-22	5.83e-20
KIF5C	147.103	3.22893	0.331507	9.74015	2.03e-22	6.05e-20
CACNA2D2	148.261	2.67875	0.275641	9.71825	2.52e-22	7.38e-20
TUBB2B	379.068	4.44289	0.457765	9.70562	2.85e-22	8.23e-20
C1orf127	28.6417	3.22398	0.33358	9.66478	4.26e-22	1.21e-19
CCDC177	110.725	-4.3769	0.452969	-9.66268	4.34e-22	1.21e-19
COL11A2	223.127	3.41745	0.353821	9.6587	4.52e-22	1.23e-19
SMC1B	1080.83	-3.39368	0.351312	-9.66002	4.46e-22	1.23e-19
SERPINB3	21416.9	-4.77817	0.495414	-9.64482	5.17e-22	1.38e-19
LYSMD2	748.473	-1.50205	0.156077	-9.62376	6.35e-22	1.68e-19
SERPINB4	11533.1	-4.94754	0.514325	-9.6195	6.62e-22	1.72e-19
KCNN1	37.4962	3.27984	0.342535	9.57521	1.02e-21	2.61e-19
TRPM3	12.0264	4.30857	0.450784	9.55796	1.2e-21	3.04e-19
WDR76	2026.37	-1.32381	0.138611	-9.55051	1.29e-21	3.22e-19
SFTA3	7.10084	7.33783	0.774102	9.47916	2.56e-21	6.32e-19
IFI16	19304.2	-2.4219	0.255759	-9.46945	2.81e-21	6.85e-19
FAM159B	3.24458	3.79875	0.401282	9.46653	2.89e-21	6.95e-19
CABP1	23.5187	2.44575	0.258967	9.44427	3.58e-21	8.49e-19
ZNF626	66.4023	3.10998	0.329689	9.43309	3.98e-21	9.33e-19
BTBD17	7.93891	6.11893	0.656477	9.32085	1.15e-20	2.67e-18
NR3C1	3112.88	-1.55833	0.167595	-9.29817	1.43e-20	3.27e-18
MICU3	44.6604	3.26617	0.351861	9.28258	1.65e-20	3.73e-18
C1orf204	123.136	2.3381	0.252119	9.27383	1.8e-20	4.01e-18
FAM218A	6.7527	3.40646	0.367404	9.2717	1.83e-20	4.04e-18
RAET1E	393.906	-3.75689	0.405456	-9.26585	1.94e-20	4.22e-18
RASL11B	285.319	3.1425	0.33929	9.26199	2.01e-20	4.32e-18
ANKRD18B	225.892	-3.9658	0.428495	-9.25517	2.14e-20	4.55e-18
MSX2	396.5	4.02908	0.436165	9.23752	2.52e-20	5.31e-18
CHGA	242.928	5.91561	0.643119	9.19831	3.64e-20	7.57e-18
CDKN2A	11659.4	-2.1341	0.232366	-9.18419	4.15e-20	8.54e-18
LYG2	8.78102	3.03789	0.330844	9.18224	4.22e-20	8.6e-18
KCNS1	1439.71	-3.86912	0.422893	-9.14918	5.74e-20	1.16e-17
CACNA1S	4.21659	5.86333	0.641586	9.13882	6.31e-20	1.26e-17
CELF3	6.98457	4.0854	0.449978	9.0791	1.09e-19	2.16e-17
TRIM7	1271.55	-2.71029	0.299285	-9.05587	1.35e-19	2.64e-17
LCN15	7.37791	6.18106	0.682711	9.05369	1.38e-19	2.67e-17
ZNF541	634.98	-3.98038	0.440267	-9.04084	1.55e-19	2.97e-17
MCUB	1971.95	-1.6442	0.182157	-9.02632	1.78e-19	3.36e-17
ALDH18A1	4564.12	1.14912	0.127334	9.02446	1.81e-19	3.38e-17
ARX	41.752	5.71899	0.633819	9.02306	1.83e-19	3.39e-17
CHGB	119.352	4.96158	0.550291	9.01629	1.95e-19	3.57e-17
NRSN1	4.30424	6.16196	0.683652	9.0133	2e-19	3.64e-17
ODC1	8780.74	2.39018	0.265645	8.99763	2.31e-19	4.16e-17
CD109	5057.61	-2.85589	0.318978	-8.95324	3.45e-19	6.1e-17
KLHDC7B	6937.35	-4.05958	0.453397	-8.95369	3.44e-19	6.1e-17
MMP28	2101.26	-3.93321	0.441538	-8.90798	5.2e-19	9.1e-17
C9orf84	292.16	-2.86459	0.322115	-8.89307	5.94e-19	1.03e-16
KYNU	2138.09	-3.68838	0.414905	-8.88969	6.13e-19	1.05e-16
MEX3A	843.245	2.67853	0.301586	8.88147	6.6e-19	1.12e-16
ITGA9	360.123	2.54467	0.286963	8.86757	7.48e-19	1.26e-16
OLFM3	4.7339	7.29354	0.822876	8.86348	7.76e-19	1.3e-16
TNNI2	628.927	-4.48356	0.506609	-8.85013	8.74e-19	1.45e-16
STOM	16502.7	-1.60681	0.181603	-8.84792	8.92e-19	1.47e-16
KRT1	3727.81	-6.86421	0.779076	-8.81071	1.24e-18	2.03e-16
SNTB1	630.971	2.74637	0.311799	8.80813	1.27e-18	2.06e-16
PROX1	147.231	4.0692	0.462475	8.79875	1.38e-18	2.22e-16
ATP1A2	56.9635	4.30517	0.491645	8.75667	2.01e-18	3.19e-16
FRZB	468.031	2.99552	0.342843	8.73729	2.39e-18	3.67e-16
SLC1A7	31.7878	3.69904	0.423352	8.73751	2.38e-18	3.67e-16
UPB1	95.0858	-4.35821	0.498776	-8.73783	2.38e-18	3.67e-16
ZNF418	29.9847	2.93049	0.335368	8.73815	2.37e-18	3.67e-16
ELAVL2	428.116	-4.1779	0.479155	-8.71931	2.8e-18	4.26e-16
SYT8	2692.58	-4.49753	0.516134	-8.71389	2.94e-18	4.44e-16
POLE2	925.56	-1.0781	0.123853	-8.70467	3.18e-18	4.77e-16
PLXNA4	147.781	3.94114	0.452908	8.70185	3.27e-18	4.86e-16
RBL1	1837.58	-1.07646	0.123792	-8.69568	3.45e-18	5.09e-16
BMP4	571.341	3.50765	0.40367	8.68938	3.64e-18	5.33e-16
CIDEB	82.9394	-2.09423	0.2414	-8.67536	4.12e-18	5.99e-16
SATB2	351.69	2.03403	0.234671	8.66759	4.41e-18	6.36e-16
EGFLAM	307.199	2.44016	0.281556	8.6667	4.45e-18	6.36e-16
ADGRD2	105.277	-4.2345	0.489637	-8.64824	5.23e-18	7.42e-16
CUBN	43.6575	2.05615	0.238045	8.63764	5.74e-18	8.09e-16
GRIN2B	10.9948	5.17659	0.602474	8.59222	8.53e-18	1.19e-15
ACTR3B	325.072	1.40972	0.164152	8.58792	8.86e-18	1.23e-15
KLHL35	780.098	-2.463	0.286813	-8.58746	8.89e-18	1.23e-15
CAPN2	20548.8	-1.31195	0.152971	-8.57649	9.78e-18	1.34e-15
TREML2	27.9353	3.30068	0.385757	8.55637	1.16e-17	1.58e-15
ZNF737	57.0854	3.15623	0.369083	8.55153	1.21e-17	1.64e-15
ADRB2	832.016	-3.354	0.392326	-8.54901	1.24e-17	1.66e-15
ZDHHC19	17.6567	3.66097	0.428373	8.54622	1.27e-17	1.69e-15
BAMBI	929.014	3.04528	0.356512	8.54186	1.32e-17	1.74e-15
RAB27B	2711.84	-2.19233	0.256673	-8.54133	1.33e-17	1.74e-15
FGF18	96.9854	3.92596	0.459963	8.53538	1.4e-17	1.82e-15
ZNF135	53.8199	3.05402	0.358296	8.52372	1.55e-17	2e-15
LRP4	940.832	3.03815	0.356515	8.52181	1.57e-17	2.02e-15
CCNJ	478.29	1.25681	0.147682	8.51022	1.74e-17	2.21e-15
UCN3	2.50153	6.10314	0.71889	8.48968	2.07e-17	2.62e-15
AC104831.1	7.78967	7.05619	0.831804	8.483	2.19e-17	2.76e-15
SLC26A7	59.4867	4.3684	0.51593	8.46704	2.52e-17	3.14e-15
PCDH18	362.809	2.76429	0.32758	8.43852	3.21e-17	3.99e-15
CLEC2B	3806.22	-3.15361	0.374126	-8.42929	3.48e-17	4.29e-15
HPSE	1152.79	-1.90037	0.225955	-8.41039	4.09e-17	5.01e-15
ZSCAN1	6.36813	4.54402	0.540559	8.40616	4.24e-17	5.16e-15
OBP2A	6.51885	4.48575	0.534393	8.3941	4.69e-17	5.68e-15
PTCH2	84.6042	2.00607	0.23985	8.36388	6.07e-17	7.29e-15
TYMP	18542.1	-2.25903	0.271309	-8.32641	8.33e-17	9.95e-15
S100A16	34326.6	-1.81206	0.218	-8.31222	9.39e-17	1.11e-14
ODF3B	2069.36	-1.93183	0.232769	-8.29936	1.05e-16	1.23e-14
FGF9	111.892	4.87655	0.58791	8.29472	1.09e-16	1.27e-14
RNASE7	462.637	-4.25266	0.513381	-8.28363	1.19e-16	1.39e-14
COL7A1	22567.8	-2.51224	0.303436	-8.27932	1.24e-16	1.43e-14
STUM	51.1154	3.88834	0.469686	8.27859	1.25e-16	1.43e-14
SOX30	197.221	-3.17056	0.383818	-8.26059	1.45e-16	1.66e-14
SBSPON	299.153	2.97562	0.360455	8.25517	1.52e-16	1.72e-14
MYO19	5293.74	-0.895699	0.108554	-8.25119	1.57e-16	1.77e-14
ZSCAN10	3.77044	3.40951	0.413269	8.2501	1.58e-16	1.78e-14
ZNF610	49.3072	3.14816	0.381646	8.2489	1.6e-16	1.78e-14
BRIP1	1346.13	-1.13486	0.13769	-8.24214	1.69e-16	1.88e-14
LGALS9C	114.736	-3.7693	0.458752	-8.21642	2.1e-16	2.31e-14
SCN1A	27.2706	6.11598	0.74451	8.21477	2.13e-16	2.33e-14
SLC29A4	284.54	3.27838	0.399397	8.20834	2.24e-16	2.44e-14
RHOV	8544.7	-2.67401	0.325919	-8.20453	2.32e-16	2.51e-14
CALML5	9492.58	-5.05984	0.617948	-8.18814	2.65e-16	2.86e-14
ULBP2	785.863	-2.5054	0.306183	-8.18268	2.78e-16	2.97e-14
ANXA2	83963.5	-1.35512	0.165669	-8.1797	2.85e-16	3.01e-14
APOBEC3A	1494.28	-4.23714	0.518012	-8.17961	2.85e-16	3.01e-14
GDF11	638.866	1.80852	0.221644	8.15956	3.36e-16	3.54e-14
SIGLEC15	46.8466	3.24358	0.397917	8.15139	3.6e-16	3.77e-14
MFSD9	640.645	0.960926	0.117935	8.14796	3.7e-16	3.85e-14
OLFM1	1444.92	-3.9218	0.481604	-8.14322	3.85e-16	3.99e-14
EFNB3	104.77	3.22097	0.396629	8.12087	4.63e-16	4.74e-14
PAX7	491.597	-7.77547	0.957416	-8.1213	4.61e-16	4.74e-14
LY6K	2386.04	-2.20922	0.272329	-8.11231	4.97e-16	5.06e-14
ZSCAN18	358.447	2.75433	0.339586	8.11086	5.03e-16	5.09e-14
RAB27A	1733.48	-1.10434	0.136245	-8.1055	5.25e-16	5.29e-14
SIX2	1292.47	-2.96568	0.366342	-8.09539	5.71e-16	5.72e-14
MMP13	1393.12	-5.01524	0.620068	-8.08821	6.05e-16	6.04e-14
TCF19	5070.26	-1.24112	0.153779	-8.07085	6.98e-16	6.92e-14
TSPAN32	99.1649	2.67213	0.331112	8.07017	7.02e-16	6.92e-14
TCP11	317.034	-3.95633	0.490969	-8.05821	7.74e-16	7.6e-14
MR1	2424.87	-1.57475	0.1956	-8.0509	8.22e-16	8.02e-14
PYY	13.0209	3.00457	0.373736	8.03929	9.04e-16	8.77e-14
ABCA12	1014.64	-2.9879	0.371843	-8.0354	9.33e-16	8.92e-14
IGFL1	1659.12	-4.90718	0.610628	-8.03629	9.26e-16	8.92e-14
PHOSPHO1	43.8636	2.45553	0.305574	8.0358	9.3e-16	8.92e-14
SCRT1	3.91189	2.84356	0.354046	8.03161	9.62e-16	9.15e-14
POU5F1B	29.2298	2.47751	0.308535	8.0299	9.75e-16	9.23e-14
ARHGEF33	169.679	-2.03437	0.254137	-8.005	1.19e-15	1.12e-13
CPA4	2139.56	-4.18029	0.522704	-7.99742	1.27e-15	1.19e-13
CA7	4.83956	3.93457	0.492233	7.99332	1.31e-15	1.22e-13
NKX6-3	3.89826	4.70229	0.590857	7.95843	1.74e-15	1.62e-13
SDCBP2	3002.25	-2.32443	0.292129	-7.95685	1.76e-15	1.63e-13
BCL9	1665.8	1.24495	0.156486	7.95568	1.78e-15	1.64e-13
CADM1	845.398	2.97444	0.375359	7.92427	2.29e-15	2.09e-13
SYPL2	32.271	2.5697	0.324264	7.9247	2.29e-15	2.09e-13
TK1	10224.7	-1.32885	0.168057	-7.90716	2.63e-15	2.38e-13
HMP19	3.53923	3.36131	0.425908	7.89211	2.97e-15	2.68e-13
DGKK	2.88746	6.32322	0.801374	7.89047	3.01e-15	2.7e-13
GRIA2	23.5728	4.77684	0.606884	7.8711	3.52e-15	3.14e-13
SLC35F1	14.7773	2.83052	0.359682	7.8695	3.56e-15	3.16e-13
SCTR	52.0012	4.61852	0.587475	7.86165	3.79e-15	3.35e-13
DUOX1	5347.31	-2.13397	0.271546	-7.8586	3.88e-15	3.42e-13
NEUROD1	1.63274	5.66161	0.722081	7.84068	4.48e-15	3.92e-13
CDO1	35.5745	3.389	0.432767	7.831	4.84e-15	4.22e-13
GPR150	45.5597	-2.81592	0.360553	-7.81001	5.72e-15	4.96e-13
ADAMTSL1	110.235	2.7602	0.353458	7.80913	5.76e-15	4.97e-13
SLC26A9	1132.87	-3.99399	0.5117	-7.80533	5.93e-15	5.1e-13
TUBA3E	3.48411	3.62185	0.464672	7.79441	6.47e-15	5.54e-13
SLC16A12	67.5304	4.49361	0.576692	7.79204	6.59e-15	5.62e-13
SLC8A3	12.8668	3.49678	0.448895	7.78975	6.71e-15	5.69e-13
RPP25	2859.26	-1.3653	0.175613	-7.77447	7.58e-15	6.4e-13
CDKN2B	5845.99	-2.09354	0.27006	-7.75213	9.04e-15	7.59e-13
PKNOX2	58.3081	3.65897	0.47366	7.72489	1.12e-14	9.37e-13
KRTDAP	989.498	-5.49809	0.711886	-7.72328	1.13e-14	9.44e-13
MCM5	11464.3	-1.0229	0.132606	-7.71386	1.22e-14	1.01e-12
TMEM249	13.0427	2.46581	0.319681	7.71333	1.23e-14	1.01e-12
TDRD9	698.255	-5.08572	0.659963	-7.70606	1.3e-14	1.07e-12
DBN1	5413.8	1.52924	0.198628	7.69904	1.37e-14	1.12e-12
FAM111B	2412.03	-1.27345	0.165428	-7.69789	1.38e-14	1.13e-12
UNC5C	99.6364	2.72992	0.355386	7.68155	1.57e-14	1.27e-12
KRT14	174103	-5.18847	0.675971	-7.67558	1.65e-14	1.32e-12
TAGLN2	66934.9	-1.08065	0.140785	-7.67588	1.64e-14	1.32e-12
C11orf95	831.692	1.34035	0.174731	7.67091	1.71e-14	1.37e-12
MAP3K6	5631.36	-1.48282	0.193398	-7.66719	1.76e-14	1.4e-12
ASTL	13.3317	2.9248	0.381616	7.66424	1.8e-14	1.43e-12
ASCL5	22.2131	3.32853	0.435016	7.65151	1.99e-14	1.56e-12
ERMN	34.7662	2.2929	0.29965	7.65193	1.98e-14	1.56e-12
SERPINB13	11450.7	-4.48251	0.585996	-7.64938	2.02e-14	1.58e-12
TCTN3	1982.76	0.866031	0.113412	7.63614	2.24e-14	1.75e-12
ETV7	1374.2	-2.06398	0.270991	-7.6164	2.61e-14	2.03e-12
MLEC	9505.31	1.09154	0.143509	7.60605	2.83e-14	2.19e-12
RERE	5118.72	0.992224	0.130573	7.59901	2.98e-14	2.3e-12
RAB11FIP2	589.93	0.925832	0.122188	7.57712	3.53e-14	2.71e-12
LGALS7	1396.33	-5.12471	0.677068	-7.56897	3.76e-14	2.88e-12
NAP1L2	23.7746	2.85902	0.37849	7.55376	4.23e-14	3.22e-12
NEDD4	1018.78	-1.54417	0.204524	-7.55007	4.35e-14	3.3e-12
PLEKHG4	2964.36	-1.47323	0.195389	-7.54001	4.7e-14	3.55e-12
LTB4R	3152.69	-2.07783	0.27599	-7.52865	5.13e-14	3.86e-12
CPLX2	69.1146	6.1991	0.823511	7.52764	5.17e-14	3.87e-12
PARP9	7761.77	-1.39957	0.186012	-7.5241	5.31e-14	3.96e-12
ZC4H2	92.2583	2.64428	0.351529	7.52224	5.38e-14	4e-12
EN1	253.045	-5.00017	0.665794	-7.51008	5.91e-14	4.38e-12
EFR3B	148.129	2.74895	0.366631	7.49788	6.49e-14	4.78e-12
IQCH	146.423	1.63266	0.218208	7.48215	7.31e-14	5.35e-12
SPRY4	1017.91	2.08853	0.279131	7.48224	7.31e-14	5.35e-12
GGA1	3168.44	0.673974	0.0901912	7.47273	7.85e-14	5.73e-12
KRT27	33.6639	5.84878	0.782792	7.4717	7.92e-14	5.75e-12
SLC26A2	1605.1	1.88615	0.252758	7.46226	8.5e-14	6.13e-12
SNX25	689.833	1.14787	0.153821	7.46238	8.5e-14	6.13e-12
HABP4	361.543	1.38593	0.185888	7.45573	8.94e-14	6.42e-12
FOLH1	117.833	2.49067	0.334206	7.45249	9.16e-14	6.55e-12
HSDL1	1512.53	0.946279	0.127064	7.44724	9.53e-14	6.79e-12
ZNF730	6.62577	4.12519	0.554627	7.43777	1.02e-13	7.27e-12
HAVCR1	8.79307	3.95538	0.532082	7.43378	1.06e-13	7.44e-12
IRX4	846.228	-5.32094	0.715788	-7.43367	1.06e-13	7.44e-12
NIPAL4	1198.9	-3.91147	0.526437	-7.43008	1.09e-13	7.62e-12
TMEM52	163.973	2.31289	0.311376	7.42797	1.1e-13	7.71e-12
SEC61A2	392.861	0.930929	0.12535	7.42666	1.11e-13	7.76e-12
CCDC60	313.436	-4.57975	0.616954	-7.42317	1.14e-13	7.94e-12
AFF3	98.0721	2.61924	0.35301	7.41972	1.17e-13	8.12e-12
SPRY3	130.126	1.94439	0.262087	7.41887	1.18e-13	8.14e-12
MAGEA8	5.1347	2.81177	0.379122	7.41653	1.2e-13	8.24e-12
SALL1	257.61	3.43037	0.462545	7.41629	1.2e-13	8.24e-12
KCNF1	27.8173	4.15679	0.560544	7.41564	1.21e-13	8.25e-12
TGM1	6264.84	-3.65646	0.493332	-7.41176	1.25e-13	8.46e-12
RAET1G	386.322	-3.06898	0.414579	-7.40264	1.34e-13	9.01e-12
RMI2	3115.14	-1.41952	0.191761	-7.40255	1.34e-13	9.01e-12
NECTIN4	10171.6	-1.84551	0.249511	-7.3965	1.4e-13	9.36e-12
TBX5	4.35643	4.39745	0.594535	7.39645	1.4e-13	9.36e-12
ADAMTS19	60.1776	5.62741	0.761373	7.39113	1.46e-13	9.71e-12
CU639417.2	1444.51	-2.38646	0.323059	-7.38709	1.5e-13	9.97e-12
CCDC183	56.162	1.60211	0.217001	7.38298	1.55e-13	1.02e-11
ARID3A	695.621	1.80938	0.245392	7.37343	1.66e-13	1.1e-11
MED12L	57.8628	2.36355	0.320796	7.36777	1.73e-13	1.14e-11
GJB3	5887.72	-1.97579	0.268304	-7.36399	1.78e-13	1.17e-11
SLURP1	298.874	-4.40471	0.598251	-7.36264	1.8e-13	1.18e-11
IL15	730.486	-2.1054	0.286151	-7.35765	1.87e-13	1.22e-11
MYO3A	716.397	-4.18215	0.568996	-7.35005	1.98e-13	1.28e-11
ALKAL2	46.5398	3.26978	0.445576	7.33832	2.16e-13	1.4e-11
S100A8	133885	-4.06405	0.554868	-7.32435	2.4e-13	1.55e-11
DPYD	2252.68	-1.82659	0.249408	-7.32373	2.41e-13	1.55e-11
CYP27B1	400.05	-1.81065	0.247246	-7.32324	2.42e-13	1.55e-11
RASIP1	3226.98	-1.97333	0.269656	-7.31795	2.52e-13	1.6e-11
TAF7L	328.324	-3.91767	0.535341	-7.31807	2.52e-13	1.6e-11
NXPE1	1.48042	4.65096	0.636354	7.30875	2.7e-13	1.7e-11
PHACTR1	179.176	1.70355	0.233085	7.30873	2.7e-13	1.7e-11
MB21D1	1495.4	-1.28217	0.175676	-7.29851	2.91e-13	1.83e-11
IL4R	8225.06	-1.44667	0.19836	-7.29314	3.03e-13	1.9e-11
TMEM252	11.2959	5.65951	0.776136	7.2919	3.06e-13	1.91e-11
ANXA2R	413.408	-1.98411	0.272322	-7.28589	3.2e-13	1.99e-11
TESMIN	386.354	1.78318	0.244832	7.28328	3.26e-13	2.02e-11
EDDM13	144.905	-3.24337	0.445506	-7.28018	3.33e-13	2.06e-11
GRIN2C	222.57	-2.70283	0.371713	-7.2713	3.56e-13	2.19e-11
TM4SF20	4.42482	4.13904	0.569324	7.27011	3.59e-13	2.21e-11
RTL1	9.51525	6.86778	0.945322	7.26501	3.73e-13	2.28e-11
HIPK2	2218.37	1.51174	0.208109	7.26416	3.75e-13	2.29e-11
SP5	189.902	3.7234	0.512601	7.26373	3.77e-13	2.29e-11
PRDM15	1385.19	-0.803798	0.110683	-7.26216	3.81e-13	2.31e-11
GINS3	1304.28	-1.05508	0.145614	-7.24577	4.3e-13	2.6e-11
LY6G6E	2.15945	4.2639	0.589082	7.23821	4.55e-13	2.74e-11
CAB39L	476.866	1.65274	0.228593	7.23007	4.83e-13	2.89e-11
DTX3L	8146.29	-1.1121	0.153813	-7.23022	4.82e-13	2.89e-11
DTL	2793.5	-0.866493	0.119906	-7.22643	4.96e-13	2.96e-11
RCOR2	367.983	2.6373	0.365052	7.22445	5.03e-13	2.99e-11
LRTM2	3.32966	4.43178	0.61357	7.22294	5.09e-13	3.01e-11
NXPH3	146.984	2.4833	0.343792	7.22326	5.08e-13	3.01e-11
NCALD	631.664	2.22154	0.307621	7.22168	5.13e-13	3.03e-11
LRRC69	39.8267	1.4753	0.204518	7.21356	5.45e-13	3.2e-11
STX3	2015.85	1.0158	0.140852	7.21181	5.52e-13	3.23e-11
ZNF439	100.294	2.03593	0.28242	7.20885	5.64e-13	3.29e-11
HOXA10	854.532	1.96469	0.272766	7.20285	5.9e-13	3.43e-11
NGB	202.915	-5.53079	0.768202	-7.19966	6.04e-13	3.5e-11
LRP2	102.901	4.40307	0.611721	7.19784	6.12e-13	3.54e-11
IGDCC3	15.6808	3.82673	0.532346	7.18843	6.55e-13	3.78e-11
ZNF492	9.02003	3.70686	0.515828	7.18623	6.66e-13	3.83e-11
TMEM233	32.7398	2.92856	0.407602	7.18486	6.73e-13	3.86e-11
MYCN	290.604	3.44518	0.47971	7.18179	6.88e-13	3.93e-11
TMEM108	36.157	3.34475	0.46576	7.18127	6.91e-13	3.93e-11
TRIM47	4166.85	-1.39752	0.194692	-7.17811	7.07e-13	4.01e-11
SERPINB7	1146.32	-3.57053	0.497679	-7.17436	7.26e-13	4.11e-11
CNFN	2536.9	-3.25827	0.45419	-7.1738	7.29e-13	4.12e-11
FGF8	8.11699	3.16954	0.441965	7.17148	7.42e-13	4.17e-11
S100A7	14190.3	-4.88197	0.681496	-7.16361	7.86e-13	4.41e-11
GRIK3	41.4548	3.07582	0.429591	7.15989	8.07e-13	4.52e-11
DUOXA1	2563.83	-2.40814	0.336394	-7.15869	8.15e-13	4.54e-11
SFTPB	24.6794	3.31635	0.463334	7.15758	8.21e-13	4.57e-11
FAM155A	41.7669	3.07943	0.430263	7.15709	8.24e-13	4.57e-11
PKD1L1	18.6178	1.8002	0.251724	7.15148	8.58e-13	4.75e-11
STMN2	119.419	3.59258	0.502417	7.1506	8.64e-13	4.76e-11
SHCBP1L	96.7701	-6.48363	0.907752	-7.14251	9.16e-13	5.04e-11
PREX2	210.115	2.58686	0.362292	7.14027	9.31e-13	5.1e-11
AIM2	1653.27	-3.37554	0.472926	-7.13756	9.5e-13	5.18e-11
ASF1B	4658.47	-1.1089	0.155363	-7.13746	9.51e-13	5.18e-11
ZNF3	1561.61	0.748449	0.104875	7.13656	9.57e-13	5.2e-11
CDK2	4833.32	-0.8059	0.113037	-7.12954	1.01e-12	5.44e-11
VIM	19891.7	1.77372	0.248787	7.12946	1.01e-12	5.44e-11
EMID1	652.02	2.97566	0.417503	7.12727	1.02e-12	5.51e-11
FGFRL1	1248.47	1.71452	0.240994	7.11436	1.12e-12	6.04e-11
CACNA1E	35.9351	3.25205	0.457215	7.11274	1.14e-12	6.07e-11
CERK	2700.4	1.0834	0.152312	7.11307	1.13e-12	6.07e-11
GNA15	5686.11	-1.92624	0.270831	-7.11231	1.14e-12	6.08e-11
ZNF664	6747.04	0.93964	0.132259	7.10457	1.21e-12	6.41e-11
HTR7	166.718	-3.69848	0.520687	-7.10308	1.22e-12	6.46e-11
VAT1L	32.2981	3.55223	0.500289	7.10036	1.24e-12	6.57e-11
SOX17	808.109	4.07843	0.574469	7.09948	1.25e-12	6.59e-11
B2M	190395	-1.49534	0.21064	-7.09906	1.26e-12	6.59e-11
FGF4	15.5606	9.62197	1.35552	7.09835	1.26e-12	6.61e-11
SCN5A	57.8822	2.7893	0.393057	7.09643	1.28e-12	6.68e-11
TNFAIP8	2569.23	-1.24037	0.174878	-7.09275	1.31e-12	6.84e-11
SLC19A3	60.9505	3.79378	0.535053	7.09047	1.34e-12	6.94e-11
OIT3	7.13933	2.72268	0.384245	7.0858	1.38e-12	7.16e-11
INPP1	3914.97	-1.9488	0.275059	-7.08501	1.39e-12	7.18e-11
KRT4	18056.2	-4.86962	0.688059	-7.07734	1.47e-12	7.57e-11
ALPPL2	201.29	5.46719	0.772763	7.07486	1.5e-12	7.68e-11
DLX5	645.414	3.25741	0.460541	7.07301	1.52e-12	7.76e-11
ARAP2	2265.72	-1.37654	0.194676	-7.07095	1.54e-12	7.86e-11
LY6G6F	1.88298	4.6374	0.656542	7.06337	1.63e-12	8.26e-11
ZNF677	84.6549	2.28977	0.324181	7.06324	1.63e-12	8.26e-11
BEST3	12.6338	3.87811	0.549238	7.0609	1.65e-12	8.38e-11
TACSTD2	65294.4	-1.84685	0.26163	-7.05901	1.68e-12	8.47e-11
AVPI1	3098.12	-2.03895	0.288949	-7.05643	1.71e-12	8.56e-11
MUC21	1412.7	-4.85396	0.687874	-7.05646	1.71e-12	8.56e-11
RASSF5	2688.25	-1.57675	0.223434	-7.05689	1.7e-12	8.56e-11
LHX9	131.765	4.23883	0.601391	7.04838	1.81e-12	9.05e-11
CASQ1	15.0746	1.9209	0.272711	7.04373	1.87e-12	9.33e-11
PPP4R1	9327.65	-1.15202	0.163854	-7.03075	2.05e-12	1.02e-10
F11R	16639.8	-0.976512	0.138973	-7.02665	2.12e-12	1.05e-10
CERS1	32.8982	3.12098	0.444633	7.01923	2.23e-12	1.1e-10
APCDD1	2986.16	2.05317	0.293005	7.0073	2.43e-12	1.2e-10
LINGO1	203.264	2.4217	0.345942	7.00031	2.55e-12	1.26e-10
EMX2	372.807	3.55899	0.508546	6.99836	2.59e-12	1.27e-10
PPM1E	27.9978	2.3534	0.336445	6.99489	2.65e-12	1.3e-10
ANXA8	3859.04	-2.97838	0.426176	-6.98862	2.78e-12	1.35e-10
S1PR5	1801.6	-2.57027	0.367817	-6.98789	2.79e-12	1.36e-10
FAM110B	103.199	2.50042	0.357905	6.98626	2.82e-12	1.37e-10
AVL9	2378.34	0.757948	0.108525	6.98406	2.87e-12	1.39e-10
PCDH9	42.8008	3.659	0.523968	6.98325	2.88e-12	1.39e-10
RNF19B	4680.41	-1.27078	0.181981	-6.98304	2.89e-12	1.39e-10
ITM2C	6297.23	2.08931	0.299234	6.98219	2.91e-12	1.4e-10
SERPINB11	196.353	-4.9593	0.71083	-6.97677	3.02e-12	1.45e-10
CLEC2A	75.0617	-7.73735	1.10914	-6.97601	3.04e-12	1.45e-10
PTP4A3	1384.38	1.58751	0.227578	6.97567	3.04e-12	1.45e-10
SHH	271.562	4.55097	0.65245	6.9752	3.05e-12	1.45e-10
FZD3	425.707	2.33442	0.334745	6.97373	3.09e-12	1.46e-10
CKM	47.5448	3.05447	0.438168	6.971	3.15e-12	1.49e-10
PLEK2	2653.64	-1.71675	0.246265	-6.97114	3.14e-12	1.49e-10
ZNF582	37.7165	2.11639	0.303699	6.96871	3.2e-12	1.51e-10
KRT78	760.728	-3.70098	0.531152	-6.96784	3.22e-12	1.51e-10
GRM3	2.69802	3.35649	0.482366	6.9584	3.44e-12	1.61e-10
IRX5	844.495	-2.32608	0.334385	-6.95628	3.49e-12	1.63e-10
ZNF257	21.1748	2.78115	0.399835	6.95573	3.51e-12	1.63e-10
SEC14L5	73.0867	2.44732	0.35192	6.9542	3.55e-12	1.65e-10
FBXO15	35.8962	2.15913	0.31071	6.94902	3.68e-12	1.71e-10
PPP1R13L	8556.67	-1.52588	0.219748	-6.94375	3.82e-12	1.77e-10
CDX2	204.693	6.84903	0.987569	6.93524	4.06e-12	1.87e-10
VPS37D	107.051	2.53092	0.365366	6.92709	4.3e-12	1.98e-10
LIG1	6101.88	-0.844664	0.122127	-6.9163	4.64e-12	2.13e-10
CA8	242.283	4.51094	0.652311	6.91531	4.67e-12	2.13e-10
MYADML2	4.37614	3.07094	0.44407	6.91544	4.66e-12	2.13e-10
HERC5	1589.63	-1.81588	0.262621	-6.91447	4.7e-12	2.14e-10
PCDH17	254.366	1.66698	0.241141	6.91288	4.75e-12	2.16e-10
PSCA	2766.33	-3.58539	0.518673	-6.91261	4.76e-12	2.16e-10
IER5	6109.39	-1.4614	0.211641	-6.90511	5.02e-12	2.27e-10
SERPINB12	293.146	-6.18484	0.895992	-6.90278	5.1e-12	2.3e-10
CAMK1G	33.0842	1.6601	0.240564	6.90089	5.17e-12	2.32e-10
HLA-DOB	300.587	-2.07129	0.300147	-6.90093	5.17e-12	2.32e-10
BCAT1	1641.9	2.88876	0.418897	6.89611	5.34e-12	2.4e-10
C1QTNF2	142.774	-2.33511	0.338694	-6.89445	5.41e-12	2.42e-10
UHRF1	3127.4	-0.993646	0.144267	-6.88755	5.68e-12	2.53e-10
CDIP1	2368.72	-1.17391	0.170534	-6.88374	5.83e-12	2.6e-10
LHX1	123.471	5.02854	0.73065	6.88228	5.89e-12	2.62e-10
CBR3	1391.5	-2.08387	0.303139	-6.8743	6.23e-12	2.76e-10
DNAH9	70.9885	3.16884	0.461147	6.87165	6.35e-12	2.8e-10
DNASE1L3	307.615	-3.4735	0.505459	-6.87198	6.33e-12	2.8e-10
WNT7B	3021.07	-1.81927	0.264891	-6.868	6.51e-12	2.86e-10
ZMYND8	2871.03	0.943692	0.137402	6.86809	6.51e-12	2.86e-10
KRT25	1.11652	3.81967	0.557312	6.85374	7.19e-12	3.15e-10
IZUMO2	2.18184	3.97695	0.581497	6.83915	7.97e-12	3.48e-10
AMTN	478.145	-4.84052	0.707818	-6.83865	7.99e-12	3.48e-10
ZBTB10	838.021	1.96479	0.287327	6.83818	8.02e-12	3.49e-10
PTPRD	143.722	3.40111	0.497527	6.83603	8.14e-12	3.53e-10
FANCL	1660.89	-0.733272	0.107289	-6.83457	8.23e-12	3.56e-10
COX6A2	22.4024	-3.95476	0.578947	-6.83096	8.43e-12	3.64e-10
MYLK3	24.0593	3.0264	0.4432	6.82851	8.58e-12	3.7e-10
FGF13	107.401	2.88022	0.421827	6.82797	8.61e-12	3.7e-10
TWIST1	340.373	2.54461	0.372905	6.82375	8.87e-12	3.8e-10
AQP3	49657	-2.70195	0.396534	-6.81392	9.5e-12	4.06e-10
HPX	45.7561	2.24236	0.329101	6.81358	9.52e-12	4.06e-10
IL20	56.7456	-3.82525	0.561527	-6.81222	9.61e-12	4.09e-10
PTCH1	708.311	2.05575	0.301934	6.80861	9.85e-12	4.19e-10
S100A7A	1131.74	-5.45612	0.801667	-6.80597	1e-11	4.26e-10
SLC25A13	1691.26	0.87315	0.12839	6.80077	1.04e-11	4.4e-10
DDIT4L	111.326	3.67491	0.540695	6.79664	1.07e-11	4.52e-10
GBP2	9881.44	-1.80706	0.266273	-6.78651	1.15e-11	4.84e-10
CD177	308.301	-3.57874	0.527543	-6.7838	1.17e-11	4.92e-10
KLRC1	72.3699	-2.73026	0.402858	-6.77723	1.23e-11	5.14e-10
NFE2	107.964	2.93783	0.433542	6.77634	1.23e-11	5.16e-10
SBSN	7772.92	-4.69292	0.693525	-6.76677	1.32e-11	5.5e-10
MLIP	82.0646	-3.11266	0.460086	-6.7654	1.33e-11	5.54e-10
ZNF683	462.548	-2.88515	0.426703	-6.76149	1.37e-11	5.68e-10
GGH	3832.6	1.33709	0.197892	6.75668	1.41e-11	5.85e-10
KCNJ18	67.7027	-5.50637	0.815435	-6.75269	1.45e-11	6e-10
HLA-DRB5	10331.1	-2.53645	0.376001	-6.74584	1.52e-11	6.28e-10
LYPD2	1157.41	-4.98668	0.739316	-6.74499	1.53e-11	6.3e-10
MANSC4	2.88558	2.45824	0.364757	6.73941	1.59e-11	6.54e-10
FAHD2B	352.114	1.91158	0.28371	6.73782	1.61e-11	6.59e-10
PNLDC1	275.279	-4.86426	0.722189	-6.73543	1.63e-11	6.69e-10
PCDHB2	126.648	3.44877	0.512338	6.73143	1.68e-11	6.86e-10
BLVRB	5571.78	-1.38807	0.206219	-6.73107	1.68e-11	6.86e-10
SAMD9	4787.4	-2.1318	0.316945	-6.72609	1.74e-11	7.08e-10
CAPG	16767.7	-1.25915	0.187277	-6.72348	1.77e-11	7.2e-10
GFOD1	1435.62	-1.59286	0.237018	-6.72041	1.81e-11	7.33e-10
TTYH1	90.8481	2.47565	0.36873	6.71399	1.89e-11	7.65e-10
PLIN2	2204.54	1.95058	0.290594	6.71237	1.91e-11	7.72e-10
REPIN1	4230.43	1.09976	0.164038	6.70429	2.02e-11	8.14e-10
CD70	440.371	-3.3207	0.49548	-6.70199	2.06e-11	8.25e-10
RASL10B	110.401	2.41779	0.360971	6.69802	2.11e-11	8.46e-10
RFX2	883.819	-1.27925	0.191044	-6.69609	2.14e-11	8.55e-10
KIAA1024L	1.0147	4.73079	0.706615	6.695	2.16e-11	8.6e-10
RPA2	5292.48	-0.899655	0.134458	-6.69097	2.22e-11	8.82e-10
KRT79	89.3398	-4.17138	0.623661	-6.68853	2.25e-11	8.94e-10
LMNA	39929.7	-1.08233	0.161821	-6.68843	2.26e-11	8.94e-10
PTPRH	964.071	-2.48468	0.371507	-6.68811	2.26e-11	8.94e-10
OAS3	10811.5	-1.50597	0.225215	-6.68678	2.28e-11	9e-10
CHRM2	2.26891	4.4421	0.664634	6.68353	2.33e-11	9.18e-10
SLC26A3	10.51	4.1376	0.619604	6.67781	2.43e-11	9.53e-10
PACSIN1	156.931	2.87758	0.431089	6.67513	2.47e-11	9.68e-10
SYT6	12.2083	3.06206	0.459097	6.66975	2.56e-11	1e-09
FGFR1	2384.84	2.32566	0.348748	6.66859	2.58e-11	1.01e-09
CHCHD7	1523.92	0.907183	0.136049	6.66806	2.59e-11	1.01e-09
BARX2	2308.81	-2.96598	0.444832	-6.66764	2.6e-11	1.01e-09
PLP2	20758.5	-1.2964	0.194609	-6.66156	2.71e-11	1.05e-09
ALDH3A1	6123.94	-3.41402	0.512602	-6.66018	2.73e-11	1.06e-09
E2F7	1485.15	-1.34168	0.201563	-6.65638	2.81e-11	1.08e-09
FOXD3	107.883	-2.88363	0.433271	-6.65548	2.82e-11	1.09e-09
PNOC	48.2794	2.94743	0.443018	6.65307	2.87e-11	1.1e-09
GPR68	1462.97	-2.4231	0.364264	-6.65206	2.89e-11	1.11e-09
GPR87	3994.07	-2.71615	0.408377	-6.65109	2.91e-11	1.11e-09
OAS2	7861.91	-1.90967	0.287708	-6.63752	3.19e-11	1.22e-09
ZNF74	784.556	0.837778	0.126241	6.63635	3.22e-11	1.23e-09
ADAMTS8	46.5517	2.93304	0.442079	6.63464	3.25e-11	1.23e-09
EPGN	144.463	-4.16362	0.627546	-6.63477	3.25e-11	1.23e-09
SRRM4	5.10406	3.65063	0.550227	6.63478	3.25e-11	1.23e-09
MOCOS	2166.48	-1.8311	0.276206	-6.62946	3.37e-11	1.28e-09
NMI	2838.08	-1.04483	0.157613	-6.6291	3.38e-11	1.28e-09
DDB2	3308.74	-1.00967	0.15244	-6.6234	3.51e-11	1.32e-09
ETNK1	2865.92	1.09984	0.16604	6.62392	3.5e-11	1.32e-09
SHANK1	26.5142	2.80504	0.423499	6.62348	3.51e-11	1.32e-09
SMCO2	74.2305	-1.88239	0.284246	-6.62238	3.53e-11	1.32e-09
LAMB3	32780.9	-2.02978	0.306563	-6.62108	3.57e-11	1.33e-09
SCN3B	90.6778	2.70536	0.408757	6.6185	3.63e-11	1.35e-09
GJB5	2723.79	-2.1815	0.329827	-6.61405	3.74e-11	1.39e-09
GRM8	79.7881	2.90649	0.440272	6.60159	4.07e-11	1.51e-09
FAM171A1	849.894	2.19146	0.332108	6.59864	4.15e-11	1.54e-09
DYNC1I1	119.949	3.20163	0.485593	6.59324	4.3e-11	1.59e-09
FLT3LG	206.497	-1.43117	0.217126	-6.59146	4.36e-11	1.61e-09
MT4	9.81483	7.25381	1.10113	6.5876	4.47e-11	1.65e-09
TAP2	5280.49	-1.44256	0.21899	-6.58733	4.48e-11	1.65e-09
CSRNP2	1622.1	0.665386	0.101168	6.57702	4.8e-11	1.76e-09
C19orf66	1910.85	-1.12762	0.171627	-6.57015	5.03e-11	1.84e-09
GPD2	4900.51	-0.896996	0.136667	-6.56339	5.26e-11	1.93e-09
CTNNA2	30.148	5.31607	0.810222	6.56125	5.34e-11	1.95e-09
NPSR1	23.1578	4.81646	0.734217	6.55999	5.38e-11	1.96e-09
PBX3	1197.97	-1.08952	0.16611	-6.55903	5.42e-11	1.97e-09
ZSCAN2	235.974	1.12541	0.171592	6.55863	5.43e-11	1.97e-09
CPXM2	271.844	2.26781	0.345951	6.5553	5.55e-11	2.01e-09
CENPK	1248.29	-1.07137	0.163699	-6.54479	5.96e-11	2.16e-09
DSE	2842.96	-1.63209	0.249542	-6.54035	6.14e-11	2.22e-09
VMO1	479.93	-2.54041	0.388455	-6.53977	6.16e-11	2.22e-09
TSPO2	3.57927	2.58911	0.395986	6.53839	6.22e-11	2.24e-09
ANKRD46	730.273	0.882154	0.134954	6.53671	6.29e-11	2.26e-09
TRIM22	4452.71	-1.76114	0.269773	-6.52824	6.65e-11	2.38e-09
CHRNB4	215.194	-2.79652	0.428871	-6.52064	7e-11	2.5e-09
C17orf53	908.093	-0.909083	0.139441	-6.5195	7.05e-11	2.52e-09
ZNF382	75.5309	1.8386	0.282225	6.51465	7.29e-11	2.6e-09
CHKA	1102.83	1.40365	0.215733	6.50644	7.7e-11	2.74e-09
NRXN3	87.3199	3.26939	0.502504	6.5062	7.71e-11	2.74e-09
C19orf33	6242.99	-2.29981	0.354099	-6.49484	8.31e-11	2.94e-09
KRT3	71.555	-3.76671	0.580142	-6.49273	8.43e-11	2.98e-09
PCNA	16580.9	-0.902459	0.139011	-6.49199	8.47e-11	2.99e-09
C3orf18	146.783	1.50679	0.232359	6.48475	8.89e-11	3.13e-09
NIPSNAP1	3952.58	0.846586	0.130598	6.48239	9.03e-11	3.17e-09
TNS4	12449.4	-2.23463	0.344734	-6.48219	9.04e-11	3.17e-09
ZIK1	58.9392	2.01537	0.311073	6.47875	9.25e-11	3.24e-09
GABRA2	5.92727	4.71665	0.728163	6.47747	9.33e-11	3.26e-09
OASL	2230.84	-2.22097	0.343241	-6.47059	9.76e-11	3.41e-09
CXCL17	10349.2	-2.82607	0.436824	-6.46958	9.83e-11	3.42e-09
STAG3	1146.36	-2.77396	0.429211	-6.46294	1.03e-10	3.57e-09
KRT15	65234.4	-3.38233	0.523371	-6.4626	1.03e-10	3.57e-09
LRRC41	4532.93	0.779482	0.12068	6.45906	1.05e-10	3.64e-09
SLC5A6	2890.76	1.24106	0.192144	6.45899	1.05e-10	3.64e-09
GNG3	11.8048	1.22735	0.190036	6.45851	1.06e-10	3.65e-09
LGALS9B	95.8784	-3.0738	0.476646	-6.44881	1.13e-10	3.88e-09
HDAC9	504.93	2.20802	0.342532	6.44619	1.15e-10	3.94e-09
MEI1	1522.85	-2.9954	0.465134	-6.43988	1.2e-10	4.1e-09
INTS8	2265.08	0.670189	0.104079	6.43924	1.2e-10	4.11e-09
KIR2DL4	99.3791	-2.73691	0.425244	-6.43609	1.23e-10	4.19e-09
KRT28	2.60827	7.81217	1.21436	6.43314	1.25e-10	4.27e-09
TM7SF2	1189.51	1.62438	0.252517	6.43275	1.25e-10	4.27e-09
TMPRSS11B	480.371	-5.75819	0.89532	-6.43143	1.26e-10	4.3e-09
KRT71	3.10821	2.787	0.433529	6.42862	1.29e-10	4.37e-09
UNC79	43.8516	1.81812	0.28285	6.42785	1.29e-10	4.39e-09
MT1A	34.4863	3.48746	0.542876	6.42406	1.33e-10	4.49e-09
MARCKSL1	10118.3	1.34307	0.209131	6.42215	1.34e-10	4.54e-09
LRRC66	33.4791	2.83508	0.441773	6.4175	1.39e-10	4.67e-09
NKX6-2	1.6106	3.54923	0.553252	6.4152	1.41e-10	4.73e-09
WDHD1	2190.24	-0.795423	0.124048	-6.41222	1.43e-10	4.82e-09
S100A11	77515.7	-1.27362	0.198767	-6.4076	1.48e-10	4.96e-09
LPO	17.2175	3.0614	0.4778	6.40728	1.48e-10	4.96e-09
ZKSCAN7	69.622	1.81125	0.282891	6.40265	1.53e-10	5.1e-09
CEL	1426.92	-3.18884	0.498259	-6.39996	1.55e-10	5.18e-09
ZWILCH	2201.23	-0.721171	0.112687	-6.39977	1.56e-10	5.18e-09
DLG4	434.583	1.54656	0.241728	6.39794	1.57e-10	5.23e-09
IKZF2	1765.36	-1.69976	0.265736	-6.39643	1.59e-10	5.28e-09
C2CD4D	120.995	-1.49876	0.234346	-6.39551	1.6e-10	5.3e-09
ZNF48	786.641	0.929663	0.145384	6.39454	1.61e-10	5.32e-09
DERL3	1516.43	-1.75859	0.275042	-6.39387	1.62e-10	5.33e-09
TRAM1L1	33.4421	2.63571	0.41223	6.3938	1.62e-10	5.33e-09
DDAH2	3879.82	1.44071	0.225505	6.38883	1.67e-10	5.5e-09
MCM2	13408.4	-0.941181	0.147406	-6.38495	1.71e-10	5.63e-09
POU3F3	67.1204	7.18236	1.12618	6.37766	1.8e-10	5.89e-09
SMAD3	7063.04	-1.29518	0.203149	-6.37551	1.82e-10	5.96e-09
NEUROG2	19.7138	4.00911	0.628856	6.37524	1.83e-10	5.96e-09
TRDMT1	192.325	1.52312	0.239002	6.37285	1.86e-10	6.05e-09
NCCRP1	4611.83	-3.11713	0.489181	-6.37214	1.86e-10	6.05e-09
SLC34A1	24.4751	-2.94575	0.462286	-6.37214	1.86e-10	6.05e-09
GPM6B	430.541	1.56073	0.245073	6.36842	1.91e-10	6.19e-09
EVA1C	1883.47	-1.71686	0.269603	-6.36808	1.91e-10	6.19e-09
SLC35G2	644.438	-1.84965	0.290533	-6.36641	1.94e-10	6.25e-09
PML	8799.79	-1.14267	0.179543	-6.36432	1.96e-10	6.33e-09
SDC1	59753	-1.48588	0.233534	-6.36258	1.98e-10	6.39e-09
RBP2	10.7523	3.60747	0.567229	6.35982	2.02e-10	6.49e-09
TET1	84.2065	2.17818	0.342526	6.35918	2.03e-10	6.51e-09
FMN2	12.6059	4.05265	0.638099	6.35113	2.14e-10	6.85e-09
HMSD	222.475	-2.38495	0.375564	-6.35032	2.15e-10	6.87e-09
PSMB9	7168.67	-1.80165	0.283916	-6.34569	2.21e-10	7.07e-09
VDR	2834.65	-1.14996	0.181252	-6.34454	2.23e-10	7.11e-09
PLSCR1	7609.02	-1.16777	0.184096	-6.34328	2.25e-10	7.16e-09
TRERF1	1644.22	-1.38933	0.219095	-6.34122	2.28e-10	7.24e-09
TMEM154	1907.32	-1.95521	0.308411	-6.33961	2.3e-10	7.3e-09
FAM83A	10021.1	-2.66453	0.420483	-6.33684	2.35e-10	7.42e-09
ARHGAP4	5395.19	-1.52128	0.240494	-6.32563	2.52e-10	7.97e-09
SIAH3	8.97479	3.76382	0.59516	6.32405	2.55e-10	8.04e-09
AOC2	56.2666	1.57593	0.249283	6.32187	2.58e-10	8.14e-09
ZPBP2	33.4162	-6.45996	1.02207	-6.32044	2.61e-10	8.2e-09
NRIP3	579.563	-1.85206	0.293057	-6.31977	2.62e-10	8.22e-09
LAMP3	3367.09	-1.90622	0.301708	-6.31809	2.65e-10	8.3e-09
TRIM29	35993.3	-2.02952	0.32138	-6.315	2.7e-10	8.45e-09
GALNT11	1970.1	1.03584	0.164091	6.31256	2.74e-10	8.57e-09
SLC15A3	3149.38	-1.39483	0.221096	-6.3087	2.81e-10	8.77e-09
SPHK1	3192.48	-1.56608	0.248329	-6.30647	2.85e-10	8.89e-09
IGFL4	23.8055	3.19568	0.506752	6.3062	2.86e-10	8.89e-09
GAP43	17.5694	2.80486	0.444802	6.30588	2.87e-10	8.89e-09
GDF5OS	1.59605	2.70314	0.428726	6.30505	2.88e-10	8.92e-09
LCE3E	60.8817	-5.15204	0.817757	-6.30021	2.97e-10	9.19e-09
TM6SF2	18.2416	2.24801	0.356873	6.2992	2.99e-10	9.24e-09
CMIP	7529.17	-1.06869	0.169725	-6.29661	3.04e-10	9.38e-09
YBX3	18577.9	-1.038	0.164894	-6.29494	3.08e-10	9.46e-09
WIF1	198.596	5.22604	0.831097	6.28813	3.21e-10	9.87e-09
PTK2B	3036.82	-1.1629	0.184993	-6.2862	3.25e-10	9.98e-09
APOBEC3C	4013.42	-1.14512	0.182256	-6.28303	3.32e-10	1.02e-08
FAM98C	1379.26	-1.00681	0.160261	-6.28233	3.34e-10	1.02e-08
UBE2L6	7452.36	-1.34016	0.213344	-6.28171	3.35e-10	1.02e-08
EPHA7	107.072	4.17377	0.6646	6.28012	3.38e-10	1.03e-08
RSPO2	3.08864	3.81755	0.60911	6.26742	3.67e-10	1.12e-08
SERPIND1	16.0417	3.36698	0.537626	6.26269	3.78e-10	1.15e-08
LDLRAP1	3756	-0.875759	0.139883	-6.26067	3.83e-10	1.16e-08
RND2	179.708	2.62157	0.418745	6.26055	3.84e-10	1.16e-08
SALL2	427.4	2.18949	0.349856	6.25826	3.89e-10	1.18e-08
ST8SIA5	12.9953	2.38431	0.381015	6.25778	3.9e-10	1.18e-08
COPZ2	1078.95	-1.94827	0.31142	-6.2561	3.95e-10	1.19e-08
OPCML	4.47224	2.90809	0.465033	6.25353	4.01e-10	1.21e-08
TLDC1	2483.19	-1.34349	0.214892	-6.25191	4.05e-10	1.22e-08
IFI35	3356.49	-1.5253	0.244	-6.25124	4.07e-10	1.22e-08
BPIFB1	1994.54	-5.31385	0.850138	-6.25057	4.09e-10	1.22e-08
ARSF	64.0481	-4.10141	0.656251	-6.24976	4.11e-10	1.23e-08
CD274	1101.74	-2.35379	0.376848	-6.24599	4.21e-10	1.26e-08
BMX	24.6131	2.0783	0.332769	6.24547	4.23e-10	1.26e-08
ITPRIP	4055.16	-1.4298	0.229016	-6.24324	4.29e-10	1.27e-08
FOSB	6280.71	-2.97537	0.476633	-6.24248	4.31e-10	1.28e-08
CDKN2C	3952.57	-1.59539	0.255625	-6.24113	4.34e-10	1.29e-08
HERC6	2594.85	-1.79242	0.287195	-6.24113	4.34e-10	1.29e-08
JUNB	22503.6	-1.45792	0.233633	-6.24024	4.37e-10	1.29e-08
NKX2-3	51.2764	-4.71786	0.756199	-6.23891	4.41e-10	1.3e-08
STK32B	89.7651	2.65918	0.426474	6.23527	4.51e-10	1.33e-08
ACLY	7768.41	0.876235	0.140578	6.23308	4.57e-10	1.34e-08
ANO10	1483.04	0.857869	0.137627	6.23331	4.57e-10	1.34e-08
SYT11	537.093	1.52565	0.244759	6.23328	4.57e-10	1.34e-08
TERF1	1310.56	0.681635	0.109476	6.22633	4.77e-10	1.4e-08
KRT24	787.469	-5.53454	0.889207	-6.22413	4.84e-10	1.41e-08
SQOR	4072.36	-1.30578	0.209794	-6.22411	4.84e-10	1.41e-08
ZSCAN21	253.811	0.685178	0.110139	6.22104	4.94e-10	1.44e-08
ALPL	1217.34	2.66036	0.427671	6.22057	4.95e-10	1.44e-08
SERPINB8	1678.14	-1.35195	0.217345	-6.22029	4.96e-10	1.44e-08
FAM171A2	376.637	2.33581	0.375617	6.2186	5.02e-10	1.46e-08
NRCAM	543.474	2.95937	0.476289	6.2134	5.18e-10	1.5e-08
GRSF1	5086.63	0.624976	0.100615	6.21156	5.25e-10	1.52e-08
LRRTM1	92.2958	5.978	0.96245	6.21123	5.26e-10	1.52e-08
SLC10A6	280.324	-3.25681	0.524732	-6.20662	5.41e-10	1.56e-08
TBC1D16	2008.54	1.61598	0.260442	6.20477	5.48e-10	1.58e-08
PRIM1	1067.45	-0.750092	0.120896	-6.20443	5.49e-10	1.58e-08
ASTN1	25.4051	3.48672	0.562505	6.19856	5.7e-10	1.64e-08
TACR2	100.942	-1.76228	0.284366	-6.19723	5.75e-10	1.65e-08
NTNG2	61.2002	1.48755	0.240133	6.19468	5.84e-10	1.67e-08
CENPP	678.297	-1.03997	0.167911	-6.19357	5.88e-10	1.68e-08
ANKRD16	344.308	0.804614	0.129991	6.18975	6.03e-10	1.72e-08
LOXHD1	3.96988	2.67884	0.432812	6.18938	6.04e-10	1.72e-08
MAJIN	118.475	-2.77654	0.448829	-6.18618	6.16e-10	1.75e-08
KCNA7	26.5593	-2.42896	0.392783	-6.18397	6.25e-10	1.77e-08
XPNPEP2	14.154	2.73343	0.4421	6.18284	6.3e-10	1.78e-08
SFTPD	207.443	-2.73126	0.441853	-6.18138	6.35e-10	1.8e-08
FDCSP	507.332	-5.33652	0.863434	-6.18058	6.39e-10	1.8e-08
TCN1	1424.82	-3.82903	0.619539	-6.18046	6.39e-10	1.8e-08
PCK1	195.005	5.24433	0.848615	6.17987	6.42e-10	1.81e-08
PAX9	953.774	-2.2541	0.364888	-6.17751	6.51e-10	1.83e-08
CTSE	556.97	-4.43631	0.718345	-6.17575	6.59e-10	1.85e-08
OSMR	5586.23	-1.52696	0.247267	-6.17536	6.6e-10	1.85e-08
IL17RD	813.31	1.75621	0.284466	6.1737	6.67e-10	1.87e-08
SLC6A13	12.5073	3.02712	0.490715	6.1688	6.88e-10	1.92e-08
POLN	48.7313	1.7398	0.282054	6.16834	6.9e-10	1.93e-08
ZKSCAN1	4039.03	0.840217	0.136338	6.16275	7.15e-10	1.99e-08
NRAP	11.0198	4.76028	0.772692	6.16065	7.24e-10	2.02e-08
SOX15	2445.04	-2.4302	0.394567	-6.15917	7.31e-10	2.03e-08
TOPBP1	5481.7	-0.829581	0.134694	-6.15899	7.32e-10	2.03e-08
GNB4	2772.19	-1.20283	0.195497	-6.1527	7.62e-10	2.11e-08
ITGA3	19605.1	-1.79948	0.292509	-6.1519	7.66e-10	2.12e-08
PYCR1	2674.73	1.43362	0.233241	6.1465	7.92e-10	2.19e-08
RP1L1	73.5191	-2.51074	0.408541	-6.14562	7.97e-10	2.2e-08
PRKCH	1957.12	-0.996516	0.162189	-6.14418	8.04e-10	2.21e-08
RCAN2	238.965	2.01285	0.327906	6.13849	8.33e-10	2.29e-08
SOX12	1810.07	1.34017	0.218377	6.13697	8.41e-10	2.31e-08
LGALS7B	5458.11	-3.6082	0.588442	-6.13179	8.69e-10	2.38e-08
NLRC5	4559.94	-1.37316	0.223969	-6.13104	8.73e-10	2.39e-08
C10orf82	19.7725	5.14929	0.840133	6.12914	8.84e-10	2.42e-08
C19orf12	1091.89	0.761097	0.124182	6.12889	8.85e-10	2.42e-08
DDX4	2.06261	2.98742	0.487458	6.12857	8.87e-10	2.42e-08
ALG1L	1022.79	-1.92879	0.314835	-6.12637	8.99e-10	2.45e-08
ZNF727	2.97303	3.57791	0.584261	6.12383	9.14e-10	2.48e-08
NSMF	2265.56	1.10342	0.180204	6.12316	9.17e-10	2.49e-08
MAGEC3	1.31702	3.68788	0.602716	6.11878	9.43e-10	2.56e-08
FUT10	278.569	0.947586	0.154945	6.11561	9.62e-10	2.6e-08
ZNF835	17.9054	2.20267	0.36021	6.11496	9.66e-10	2.61e-08
S100A14	31246	-1.81829	0.29738	-6.11436	9.69e-10	2.62e-08
RHBDL2	1232.35	-1.61935	0.264868	-6.11382	9.73e-10	2.62e-08
B3GNT5	3985.05	-1.52243	0.249172	-6.10995	9.97e-10	2.68e-08
MMP16	79.2015	2.28356	0.373854	6.10816	1.01e-09	2.71e-08
TBL2	2168.6	0.743829	0.121814	6.10624	1.02e-09	2.74e-08
HMCES	6980.82	-0.864268	0.141603	-6.10347	1.04e-09	2.78e-08
C2orf82	88.1983	1.53292	0.251274	6.10061	1.06e-09	2.83e-08
ROS1	138.248	-4.14438	0.679411	-6.09995	1.06e-09	2.84e-08
ACVR2B	605.423	1.05712	0.173346	6.09835	1.07e-09	2.86e-08
SPHK2	825.705	0.820745	0.134584	6.09838	1.07e-09	2.86e-08
DOK4	1879.63	1.32267	0.216935	6.09709	1.08e-09	2.88e-08
LTB4R2	444.339	-1.70602	0.279865	-6.09587	1.09e-09	2.89e-08
SERPINB5	16504.1	-2.39454	0.393221	-6.08957	1.13e-09	3.01e-08
GJB6	4852.47	-3.4875	0.572807	-6.08843	1.14e-09	3.02e-08
C11orf49	1364.15	1.05168	0.172802	6.08606	1.16e-09	3.06e-08
EMX1	70.3321	-3.27934	0.539019	-6.08391	1.17e-09	3.1e-08
PLA2G12A	1396.95	0.657957	0.108182	6.08194	1.19e-09	3.13e-08
TNNT3	203.536	-3.34313	0.549946	-6.07901	1.21e-09	3.19e-08
CDCA4	3386.81	-0.874685	0.143892	-6.07877	1.21e-09	3.19e-08
IL12RB2	435.121	-2.52369	0.415251	-6.07751	1.22e-09	3.21e-08
DEFA6	2.33782	7.79063	1.28293	6.07254	1.26e-09	3.3e-08
PHF23	2088.95	0.698129	0.114967	6.07245	1.26e-09	3.3e-08
ST6GAL2	143.647	2.76612	0.455677	6.07035	1.28e-09	3.34e-08
ELL2	4937.9	-1.33551	0.220034	-6.06956	1.28e-09	3.35e-08
ZNF423	145.856	2.21625	0.365181	6.0689	1.29e-09	3.36e-08
GABRP	11659.7	-3.52723	0.581558	-6.06513	1.32e-09	3.44e-08
LIMK2	7286.22	-0.854762	0.140992	-6.06248	1.34e-09	3.49e-08
ZNF124	191.654	1.04704	0.17277	6.06034	1.36e-09	3.53e-08
ZC3H12B	52.0691	1.28393	0.211919	6.05857	1.37e-09	3.56e-08
ZNF208	7.28281	2.39499	0.395355	6.05784	1.38e-09	3.58e-08
IFIH1	2706.26	-1.32469	0.218761	-6.05542	1.4e-09	3.62e-08
GIPC3	88.1724	1.49028	0.246176	6.05372	1.42e-09	3.66e-08
THBS4	186.496	2.30481	0.380864	6.05151	1.43e-09	3.7e-08
CPSF4L	5.98518	2.07459	0.342848	6.05104	1.44e-09	3.71e-08
TLE1	2395.76	1.00827	0.166642	6.05051	1.44e-09	3.72e-08
BIRC3	5479.69	-2.54742	0.421124	-6.0491	1.46e-09	3.74e-08
ASTE1	753.102	-0.815379	0.134813	-6.04824	1.46e-09	3.76e-08
MTHFD1	7474.92	-0.668381	0.110521	-6.04755	1.47e-09	3.77e-08
RWDD2A	283.599	1.03469	0.171145	6.04567	1.49e-09	3.81e-08
CMTM4	1993.8	1.10209	0.182425	6.04132	1.53e-09	3.91e-08
EHD2	7567.59	-1.52398	0.252308	-6.04014	1.54e-09	3.93e-08
IL1RL1	60.5045	-2.69208	0.445695	-6.04018	1.54e-09	3.93e-08
MAP3K5	2549.37	-1.11924	0.185361	-6.03813	1.56e-09	3.97e-08
DPP10	8.62821	5.83745	0.966826	6.03774	1.56e-09	3.97e-08
SLC38A4	120.945	3.08803	0.511719	6.03462	1.59e-09	4.05e-08
TNFSF9	715.614	-2.32686	0.385666	-6.03335	1.61e-09	4.07e-08
LRRC19	15.7154	2.80096	0.464627	6.02841	1.66e-09	4.19e-08
SLC18A1	3.74538	2.52652	0.419117	6.02819	1.66e-09	4.19e-08
CLUL1	45.1086	2.57758	0.42765	6.02732	1.67e-09	4.21e-08
RAB39B	42.8856	1.93225	0.320592	6.02714	1.67e-09	4.21e-08
RYR1	2981.87	-2.21431	0.36743	-6.02649	1.68e-09	4.22e-08
STEAP1B	259.91	-2.58263	0.428603	-6.0257	1.68e-09	4.24e-08
LYPD3	21833	-2.52701	0.419435	-6.0248	1.69e-09	4.25e-08
ANKRD7	6.04847	3.74963	0.622425	6.02422	1.7e-09	4.26e-08
ZNF367	1431.12	-0.922376	0.153197	-6.02085	1.74e-09	4.35e-08
CLTB	11582.1	-1.37378	0.228192	-6.02026	1.74e-09	4.36e-08
HAP1	702.241	-2.59763	0.431782	-6.01606	1.79e-09	4.47e-08
EDN2	2167.53	-2.94068	0.489077	-6.01272	1.82e-09	4.54e-08
FRMPD1	23.5537	3.08208	0.512606	6.01257	1.83e-09	4.54e-08
MORN4	196.325	1.38456	0.230276	6.01262	1.83e-09	4.54e-08
ACSM3	258.099	2.37295	0.394805	6.01043	1.85e-09	4.6e-08
RIN1	1994.43	-1.50135	0.249863	-6.00867	1.87e-09	4.64e-08
CHP2	511.813	-3.87495	0.644929	-6.00834	1.87e-09	4.65e-08
GAD1	461.232	2.18055	0.363006	6.00693	1.89e-09	4.67e-08
ZNF486	110.071	2.44818	0.407552	6.00703	1.89e-09	4.67e-08
CST1	114.801	3.84068	0.639475	6.00598	1.9e-09	4.7e-08
SULT1C4	52.4029	2.50253	0.41701	6.00113	1.96e-09	4.83e-08
RNF43	1539.03	1.29655	0.216257	5.99543	2.03e-09	5e-08
BEX1	39.7831	4.05512	0.676536	5.99394	2.05e-09	5.03e-08
FAM53C	2225.56	0.670263	0.111827	5.99375	2.05e-09	5.03e-08
GPR82	44.1467	-1.7686	0.295058	-5.99408	2.05e-09	5.03e-08
AKR1B10	6057.25	-3.56327	0.594587	-5.99285	2.06e-09	5.05e-08
MYCNOS	9.85672	3.10614	0.518343	5.99245	2.07e-09	5.06e-08
CLCN1	78.7692	-2.68514	0.448286	-5.98978	2.1e-09	5.13e-08
RFPL2	2.93727	2.79045	0.465927	5.98902	2.11e-09	5.15e-08
RRAD	2148.37	-3.00015	0.501061	-5.98759	2.13e-09	5.19e-08
ITPKC	6783.56	-1.41311	0.236016	-5.98733	2.13e-09	5.19e-08
HLA-DQB2	1579.72	-2.26393	0.378162	-5.98668	2.14e-09	5.21e-08
FAM9C	2.75011	4.09361	0.684062	5.98427	2.17e-09	5.27e-08
SH3TC1	2098.28	-1.39147	0.232517	-5.98436	2.17e-09	5.27e-08
CA2	3964.38	-2.59989	0.434553	-5.98291	2.19e-09	5.31e-08
ZNF98	1.73981	3.39689	0.567946	5.98101	2.22e-09	5.36e-08
BST2	18699.9	-1.54485	0.25834	-5.9799	2.23e-09	5.39e-08
DIRAS3	84.0473	2.21926	0.371122	5.97986	2.23e-09	5.39e-08
MPP3	410.657	-1.21858	0.203839	-5.97816	2.26e-09	5.44e-08
ELF4	3848.44	-0.967058	0.161779	-5.97763	2.26e-09	5.45e-08
OBP2B	3.70231	4.54643	0.760613	5.97732	2.27e-09	5.45e-08
HAUS5	2526.37	-0.804684	0.134634	-5.97682	2.28e-09	5.46e-08
NAPSA	71.0139	1.53959	0.257643	5.97565	2.29e-09	5.49e-08
C17orf99	37.8758	-2.37848	0.398059	-5.97519	2.3e-09	5.5e-08
SDC2	1599.72	1.99094	0.333561	5.96875	2.39e-09	5.71e-08
ADGRF5	468.683	1.43991	0.241277	5.96788	2.4e-09	5.74e-08
AMACR	249.626	1.27935	0.214453	5.96566	2.44e-09	5.8e-08
TFAP2C	2767.03	-1.2696	0.21282	-5.96559	2.44e-09	5.8e-08
IRF6	21619.8	-1.44131	0.241706	-5.96309	2.48e-09	5.88e-08
SLC37A4	1386.17	0.975046	0.163516	5.96299	2.48e-09	5.88e-08
SP100	3249.87	-0.906216	0.151974	-5.96296	2.48e-09	5.88e-08
KCNK1	2729.47	-1.25228	0.210162	-5.95866	2.54e-09	6.02e-08
SLC14A1	56.6584	2.49235	0.418414	5.95666	2.57e-09	6.09e-08
THBD	6094.7	-2.34544	0.393761	-5.9565	2.58e-09	6.09e-08
LRCH2	72.5096	2.19613	0.368876	5.95359	2.62e-09	6.19e-08
FOXE3	61.1633	-2.86031	0.480503	-5.95273	2.64e-09	6.22e-08
CXCL11	1846.77	-2.97668	0.500426	-5.9483	2.71e-09	6.38e-08
ST8SIA2	62.4163	3.43589	0.577961	5.94485	2.77e-09	6.51e-08
SV2A	447.858	2.41233	0.405799	5.94464	2.77e-09	6.51e-08
NPAS3	144.119	3.17808	0.534697	5.94372	2.79e-09	6.53e-08
DONSON	1987.53	-0.686325	0.115491	-5.94269	2.8e-09	6.57e-08
TRPV4	1491.38	-1.55467	0.26165	-5.94181	2.82e-09	6.59e-08
CXCR2	184.469	-2.72538	0.458946	-5.93834	2.88e-09	6.73e-08
CYSRT1	673.234	-2.24416	0.377957	-5.9376	2.89e-09	6.75e-08
KANK4	185.291	3.59886	0.606172	5.93704	2.9e-09	6.76e-08
PHF19	3095.71	-0.81888	0.138008	-5.93356	2.96e-09	6.9e-08
S100A2	78139.7	-2.51784	0.424397	-5.93275	2.98e-09	6.93e-08
HENMT1	1565.8	-1.07037	0.180585	-5.92722	3.08e-09	7.15e-08
XKR4	14.6816	3.52222	0.594312	5.92656	3.09e-09	7.17e-08
PPARG	308.681	2.53322	0.427821	5.92121	3.2e-09	7.4e-08
KRT9	109.897	-2.59603	0.438496	-5.9203	3.21e-09	7.43e-08
KCNK6	4057.67	-1.48562	0.250957	-5.91983	3.22e-09	7.45e-08
TAP1	18329.6	-1.441	0.243485	-5.91825	3.25e-09	7.51e-08
URI1	3922.58	0.669189	0.113159	5.91372	3.34e-09	7.71e-08
PLEKHA8	922.208	0.759383	0.128431	5.91276	3.36e-09	7.74e-08
DNAH10OS	41.081	1.96487	0.332356	5.91193	3.38e-09	7.77e-08
C19orf57	1056.57	-1.48982	0.252023	-5.91145	3.39e-09	7.79e-08
ITGB6	8646.39	-1.94518	0.329122	-5.91023	3.42e-09	7.84e-08
CARD17	39.2167	-2.78371	0.471036	-5.90976	3.43e-09	7.84e-08
LMBR1	2198	0.750027	0.126916	5.90965	3.43e-09	7.84e-08
HSPB8	2236.9	-1.84821	0.312827	-5.90808	3.46e-09	7.91e-08
NPBWR1	129.01	-3.76216	0.636874	-5.90722	3.48e-09	7.94e-08
MCHR1	12.8944	2.28117	0.386195	5.90679	3.49e-09	7.95e-08
JAK2	1345.03	-1.47652	0.249989	-5.90633	3.5e-09	7.97e-08
TP53AIP1	403.213	-3.09147	0.523475	-5.90566	3.51e-09	7.99e-08
AIRE	5.04165	2.80513	0.475194	5.90313	3.57e-09	8.1e-08
KIZ	1211.4	1.21298	0.205629	5.89891	3.66e-09	8.3e-08
TDRD7	1472.82	-0.79295	0.134439	-5.89822	3.67e-09	8.33e-08
CST6	868.539	-2.70658	0.459017	-5.89647	3.71e-09	8.4e-08
CYP1A2	1.5393	3.74911	0.636051	5.89436	3.76e-09	8.5e-08
SCN4A	6.62218	2.92241	0.495877	5.89343	3.78e-09	8.54e-08
C1orf106	3580.15	-1.33311	0.226405	-5.88816	3.91e-09	8.81e-08
SLC12A3	15.6584	2.30884	0.392178	5.88722	3.93e-09	8.85e-08
ZNF185	11495.4	-1.64036	0.278857	-5.88244	4.04e-09	9.09e-08
ZNF880	124.29	1.91112	0.324903	5.88212	4.05e-09	9.1e-08
TBX2	382.721	1.80331	0.306606	5.88154	4.06e-09	9.12e-08
MS4A2	48.5735	-2.24921	0.382453	-5.88101	4.08e-09	9.13e-08
TMEM94	3720.95	0.742372	0.12623	5.88111	4.08e-09	9.13e-08
CKMT2	55.6049	2.14608	0.364974	5.8801	4.1e-09	9.17e-08
DNMT3A	2621.5	0.908967	0.154712	5.87521	4.22e-09	9.43e-08
MGAT5	3418.93	1.01971	0.173565	5.87506	4.23e-09	9.43e-08
ADAD2	66.3838	-2.42278	0.412533	-5.87293	4.28e-09	9.54e-08
SBK1	1027.16	2.09623	0.357002	5.87176	4.31e-09	9.6e-08
RNF17	13.5841	-2.87059	0.488959	-5.87081	4.34e-09	9.64e-08
OTOG	9.44284	4.40931	0.75112	5.87031	4.35e-09	9.66e-08
GSDMC	1907.73	-2.28363	0.389104	-5.86896	4.39e-09	9.73e-08
RGR	2.3248	5.32713	0.907796	5.8682	4.41e-09	9.75e-08
TECTA	21.3965	1.43934	0.245281	5.86813	4.41e-09	9.75e-08
OTOP3	46.5113	-4.32532	0.73731	-5.86635	4.46e-09	9.84e-08
SOX7	1451.93	-2.08696	0.355784	-5.86582	4.47e-09	9.86e-08
CTNNB1	17937.1	0.917653	0.156464	5.86496	4.49e-09	9.9e-08
LYNX1	4995.12	-2.58548	0.440895	-5.86416	4.51e-09	9.94e-08
AC011473.4	110.015	-4.3483	0.741559	-5.86373	4.53e-09	9.95e-08
SLC19A1	943.758	1.24889	0.213043	5.86217	4.57e-09	1e-07
ABLIM3	858.206	-2.08409	0.355752	-5.85827	4.68e-09	1.03e-07
LINC00094	668.996	0.949067	0.162016	5.85786	4.69e-09	1.03e-07
MYL3	7.85536	2.26287	0.386423	5.85593	4.74e-09	1.04e-07
CST5	2.34531	4.65667	0.795532	5.85353	4.81e-09	1.05e-07
TBX6	530.073	-1.67222	0.285677	-5.85354	4.81e-09	1.05e-07
FETUB	52.1592	-4.86995	0.832168	-5.85212	4.85e-09	1.06e-07
PIM3	6839.34	-0.920809	0.157441	-5.8486	4.96e-09	1.08e-07
PAPPA2	12.6377	3.17899	0.543583	5.84821	4.97e-09	1.08e-07
ANKRD30BL	0.819313	4.35929	0.745741	5.84558	5.05e-09	1.1e-07
MFSD4B	236.447	0.883671	0.151224	5.84347	5.11e-09	1.11e-07
KCNK12	10.6383	2.14323	0.366922	5.8411	5.19e-09	1.12e-07
TNFRSF19	748.805	2.52179	0.431943	5.83824	5.28e-09	1.14e-07
CLIP1	6983.81	-0.985404	0.168802	-5.83763	5.29e-09	1.15e-07
FAM212A	550.306	-1.9676	0.337108	-5.83672	5.32e-09	1.15e-07
LRRC75A	141.92	1.62962	0.279237	5.83599	5.35e-09	1.15e-07
ZNF671	88.182	1.4565	0.249635	5.83452	5.39e-09	1.16e-07
CTXN1	541.353	2.04478	0.350596	5.83229	5.47e-09	1.18e-07
BRSK1	195.466	2.05222	0.352189	5.82705	5.64e-09	1.21e-07
RFC4	4226.03	-0.909192	0.156061	-5.82587	5.68e-09	1.22e-07
KCNJ1	9.89968	2.84007	0.487658	5.8239	5.75e-09	1.23e-07
TMEM72	15.7907	4.97086	0.853707	5.82268	5.79e-09	1.24e-07
C8orf34	20.7628	3.04394	0.522933	5.82089	5.85e-09	1.25e-07
GPR173	123.017	2.22178	0.38197	5.81663	6e-09	1.28e-07
ELK3	3492.17	-1.09958	0.189049	-5.81635	6.01e-09	1.29e-07
MBD2	6917.5	-0.830291	0.142979	-5.80707	6.36e-09	1.36e-07
PROM2	13784	-1.51789	0.26143	-5.80609	6.4e-09	1.36e-07
IQGAP3	4487.34	-0.981637	0.169153	-5.80324	6.5e-09	1.38e-07
RBFOX1	1.75426	3.55791	0.61308	5.80333	6.5e-09	1.38e-07
LIPE	662.178	-1.32192	0.227848	-5.80175	6.56e-09	1.39e-07
LSP1	4506.79	-1.86483	0.321515	-5.80015	6.63e-09	1.41e-07
ISLR2	76.722	2.19638	0.378949	5.79597	6.79e-09	1.44e-07
CAV2	4159.52	-1.55807	0.268917	-5.79386	6.88e-09	1.46e-07
ROBO2	239.898	2.6982	0.46592	5.79113	6.99e-09	1.48e-07
ETV4	1194.89	2.22693	0.384641	5.78962	7.05e-09	1.49e-07
HSPA12A	266.935	1.79293	0.309683	5.78957	7.06e-09	1.49e-07
DIRAS2	42.5458	3.91299	0.676462	5.78449	7.27e-09	1.53e-07
SPRR2A	7276.82	-3.93936	0.681326	-5.7819	7.39e-09	1.56e-07
RSAD1	1385.11	0.738784	0.127787	5.78139	7.41e-09	1.56e-07
TMEM100	108.677	3.42014	0.591754	5.77966	7.49e-09	1.57e-07
VSIR	3293.04	-1.23445	0.213631	-5.77841	7.54e-09	1.58e-07
SLC17A8	1.04416	3.77465	0.653255	5.77821	7.55e-09	1.58e-07
SPX	18.415	3.68217	0.637383	5.77702	7.6e-09	1.59e-07
IL1RL2	408.036	-1.57558	0.27277	-5.77622	7.64e-09	1.6e-07
S100A12	313.089	-3.05939	0.529747	-5.77519	7.69e-09	1.61e-07
SPRR2E	3926.37	-4.39747	0.761762	-5.77277	7.8e-09	1.63e-07
KCNA2	8.58581	2.77138	0.480103	5.77246	7.81e-09	1.63e-07
SLC6A6	2594.19	1.27942	0.221911	5.76545	8.14e-09	1.7e-07
FAM159A	86.3504	-1.9505	0.338328	-5.76511	8.16e-09	1.7e-07
CASP6	1166.66	0.761643	0.132171	5.76256	8.28e-09	1.72e-07
SORCS1	27.5544	3.3666	0.58421	5.76265	8.28e-09	1.72e-07
ERVMER34-1	674.909	1.93743	0.336473	5.75805	8.51e-09	1.76e-07
ATP2B2	36.9569	2.91671	0.5067	5.75629	8.6e-09	1.78e-07
C1orf68	18.277	-4.69382	0.815525	-5.75558	8.63e-09	1.78e-07
CYP4F22	94.0478	-2.82672	0.491146	-5.75535	8.65e-09	1.78e-07
SLC25A15	263.694	1.03828	0.180402	5.75536	8.65e-09	1.78e-07
TTC19	2057.58	0.729141	0.126712	5.75434	8.7e-09	1.79e-07
NKD2	495.011	2.19171	0.381081	5.75129	8.86e-09	1.82e-07
IGF2	3059.44	2.38098	0.414089	5.74993	8.93e-09	1.84e-07
TAC1	11.0875	4.33823	0.755675	5.74087	9.42e-09	1.94e-07
KCNIP4	58.6614	0.949228	0.165431	5.73791	9.59e-09	1.97e-07
PARP14	9930.43	-1.04742	0.182546	-5.73785	9.59e-09	1.97e-07
IL24	265.272	-2.17509	0.379238	-5.73542	9.73e-09	1.99e-07
PCDHB11	67.8814	2.3804	0.415143	5.73392	9.81e-09	2.01e-07
ORC1	1339.44	-0.73697	0.128543	-5.73328	9.85e-09	2.01e-07
RARG	7530.29	-1.06545	0.185923	-5.7306	1e-08	2.04e-07
NAT16	3.92798	2.31433	0.404011	5.7284	1.01e-08	2.07e-07
CASKIN1	52.4641	2.17645	0.38006	5.72659	1.02e-08	2.08e-07
SLIT3	516.666	2.03319	0.355037	5.72668	1.02e-08	2.08e-07
BRINP2	15.1719	4.65468	0.813168	5.72413	1.04e-08	2.11e-07
BLCAP	8743.23	-0.889184	0.155347	-5.72385	1.04e-08	2.11e-07
HYAL2	2477.52	0.704337	0.12307	5.72304	1.05e-08	2.12e-07
KCNK17	19.3572	2.15403	0.376507	5.72109	1.06e-08	2.14e-07
AADAT	266.028	2.19443	0.3836	5.7206	1.06e-08	2.15e-07
CXCL10	6589.26	-2.67199	0.467192	-5.71926	1.07e-08	2.16e-07
KHDC1	239.313	-1.22686	0.214695	-5.71442	1.1e-08	2.22e-07
PPM1N	269.841	-1.81261	0.317247	-5.71357	1.11e-08	2.23e-07
TUBA4A	10854.9	-1.36362	0.238683	-5.71312	1.11e-08	2.24e-07
CAGE1	24.6828	-2.25972	0.395714	-5.71048	1.13e-08	2.27e-07
STOML1	1167.55	-0.953757	0.167016	-5.71056	1.13e-08	2.27e-07
BSN	68.0691	1.83885	0.322357	5.70439	1.17e-08	2.35e-07
ARSI	824.401	-2.47574	0.434078	-5.70344	1.17e-08	2.36e-07
BCL3	6160.45	-1.03494	0.181575	-5.69979	1.2e-08	2.4e-07
SYNGR3	793.639	-1.86559	0.327584	-5.69499	1.23e-08	2.47e-07
KRT10	9961.35	-2.42114	0.425221	-5.69384	1.24e-08	2.48e-07
HLA-F	10586.2	-1.64376	0.288754	-5.69258	1.25e-08	2.5e-07
KCND3	562.346	-2.25894	0.396874	-5.69182	1.26e-08	2.51e-07
PCDHA1	7.91669	3.26878	0.574332	5.69145	1.26e-08	2.51e-07
RAB11FIP3	2044.46	0.980499	0.1724	5.68733	1.29e-08	2.57e-07
GPR78	179.399	-3.13358	0.551168	-5.68535	1.31e-08	2.6e-07
KLRC2	33.6304	-2.65821	0.467807	-5.68229	1.33e-08	2.64e-07
ANKRD13A	3234.35	-0.661262	0.116379	-5.68198	1.33e-08	2.64e-07
ZNRF3	10.0365	1.68537	0.296745	5.67951	1.35e-08	2.68e-07
CDT1	3952.39	-0.92512	0.162978	-5.67635	1.38e-08	2.73e-07
ASPG	640.394	-2.72789	0.480616	-5.67582	1.38e-08	2.73e-07
C16orf74	1024.43	-1.75721	0.309709	-5.67373	1.4e-08	2.76e-07
DACH1	310.528	2.66612	0.469892	5.6739	1.4e-08	2.76e-07
SPRR1A	6264	-3.86588	0.681327	-5.67404	1.39e-08	2.76e-07
IRF1	8280.06	-1.3478	0.237615	-5.67219	1.41e-08	2.78e-07
REM2	58.2202	1.0939	0.192852	5.67221	1.41e-08	2.78e-07
HEPH	563.989	2.26108	0.398691	5.67126	1.42e-08	2.79e-07
LRRC8C	1123.31	-1.09843	0.193731	-5.66986	1.43e-08	2.81e-07
F10	77.7201	2.0964	0.369784	5.66926	1.43e-08	2.81e-07
RAP2B	7610.79	-1.23231	0.217485	-5.66619	1.46e-08	2.86e-07
HOXD10	966.365	-1.84008	0.32497	-5.66232	1.49e-08	2.92e-07
SH2D6	18.4811	2.45466	0.433705	5.65974	1.52e-08	2.97e-07
IL15RA	1344.53	-1.24343	0.219749	-5.65839	1.53e-08	2.99e-07
DFFB	354.309	0.754408	0.133385	5.65587	1.55e-08	3.03e-07
LAMA3	12034.5	-2.0415	0.361008	-5.65499	1.56e-08	3.04e-07
ISG20	2510.95	-1.45962	0.258123	-5.65476	1.56e-08	3.04e-07
ZDHHC9	2813.07	0.871276	0.154085	5.65451	1.56e-08	3.04e-07
BCOR	2040.63	0.807861	0.142903	5.65323	1.57e-08	3.06e-07
SLC27A6	24.5505	3.46819	0.613553	5.65263	1.58e-08	3.07e-07
PSAPL1	43.7291	-4.2038	0.743976	-5.65044	1.6e-08	3.1e-07
TRIM16	2882.1	-1.3027	0.230542	-5.65061	1.6e-08	3.1e-07
HES1	6740.86	-1.03977	0.18405	-5.64935	1.61e-08	3.12e-07
DLX6	220.857	2.84257	0.503249	5.64843	1.62e-08	3.13e-07
PROSER1	2544.06	0.725984	0.128526	5.64854	1.62e-08	3.13e-07
PEG3	49.7069	2.13634	0.378323	5.64687	1.63e-08	3.15e-07
FGFR4	583.381	2.11578	0.37474	5.64599	1.64e-08	3.17e-07
HEATR3	1376.19	0.573237	0.101532	5.64587	1.64e-08	3.17e-07
CLEC7A	1240.6	-2.29775	0.407098	-5.64421	1.66e-08	3.19e-07
CYP4F12	850.671	-2.58453	0.457914	-5.64415	1.66e-08	3.19e-07
FMO3	222.376	-3.17005	0.561902	-5.64164	1.68e-08	3.23e-07
TYRP1	27.4348	3.72207	0.659901	5.64035	1.7e-08	3.25e-07
KISS1R	34.5714	2.76575	0.490649	5.63691	1.73e-08	3.31e-07
MCF2L2	83.3749	-1.41889	0.251712	-5.63694	1.73e-08	3.31e-07
NOG	34.5252	2.85895	0.507169	5.63707	1.73e-08	3.31e-07
ADCYAP1R1	60.7545	2.97221	0.527593	5.63353	1.77e-08	3.37e-07
TIPIN	728.47	-0.696322	0.123616	-5.63295	1.77e-08	3.38e-07
IDO1	7027.21	-2.63147	0.467246	-5.63189	1.78e-08	3.39e-07
PAX5	165.381	-2.36735	0.420337	-5.63203	1.78e-08	3.39e-07
STAT5A	2936.3	-1.18438	0.210336	-5.63089	1.79e-08	3.41e-07
DHCR24	31861.8	-1.0562	0.187592	-5.63027	1.8e-08	3.42e-07
FAM92A	910.026	0.991109	0.176027	5.63044	1.8e-08	3.42e-07
FOXN1	1401.45	-2.55688	0.454271	-5.62854	1.82e-08	3.45e-07
ZNF583	61.4587	1.84905	0.328522	5.62838	1.82e-08	3.45e-07
GLYATL1	14.5052	3.49859	0.621682	5.62762	1.83e-08	3.46e-07
RTBDN	92.4804	-3.16801	0.563033	-5.62669	1.84e-08	3.47e-07
RAB31	6653.33	-1.42677	0.253616	-5.62572	1.85e-08	3.49e-07
TMEFF1	4.61836	2.94402	0.523399	5.62482	1.86e-08	3.5e-07
ZNF488	352.078	-2.06082	0.366552	-5.62218	1.89e-08	3.55e-07
SLAMF1	153.474	-1.70575	0.303451	-5.62118	1.9e-08	3.57e-07
NOX1	119.686	1.37279	0.244327	5.61865	1.92e-08	3.62e-07
PTAFR	1958.13	-1.39326	0.247996	-5.61806	1.93e-08	3.63e-07
SVOP	2.02737	2.92122	0.520008	5.61765	1.94e-08	3.63e-07
NUDT4	1691.37	0.848423	0.151045	5.61703	1.94e-08	3.64e-07
KIAA1211	100.78	2.38605	0.424862	5.61607	1.95e-08	3.66e-07
IRF5	2043.61	-1.47801	0.263305	-5.61328	1.99e-08	3.72e-07
KLHDC9	183.693	1.81089	0.322731	5.61114	2.01e-08	3.76e-07
SRD5A2	18.9876	3.02139	0.538887	5.60672	2.06e-08	3.85e-07
TBC1D26	2.39705	2.89904	0.517164	5.60564	2.07e-08	3.87e-07
CLEC12A	92.1201	-2.26369	0.403936	-5.60407	2.09e-08	3.9e-07
DAAM2	226.01	1.95249	0.3485	5.60256	2.11e-08	3.93e-07
GDAP1L1	3.1036	2.17529	0.388254	5.60274	2.11e-08	3.93e-07
RHEBL1	229.824	-1.08649	0.193923	-5.60266	2.11e-08	3.93e-07
OR51E1	34.0452	1.96004	0.349873	5.60216	2.12e-08	3.93e-07
SLC4A1	3.76292	2.1434	0.382716	5.60048	2.14e-08	3.97e-07
GNAT3	1.68312	6.67992	1.19282	5.60011	2.14e-08	3.97e-07
CLIC5	469.792	2.52888	0.451794	5.59742	2.18e-08	4.03e-07
FGFBP1	8618.44	-2.78015	0.496819	-5.59589	2.19e-08	4.06e-07
C1QL1	399.458	-2.2542	0.402971	-5.59394	2.22e-08	4.1e-07
GDF9	29.1305	1.15424	0.206365	5.5932	2.23e-08	4.12e-07
YIPF3	5997.71	0.591998	0.105846	5.59301	2.23e-08	4.12e-07
CYTL1	41.044	2.26552	0.405284	5.58995	2.27e-08	4.18e-07
HS2ST1	2100.2	0.6083	0.108819	5.59004	2.27e-08	4.18e-07
DLL4	351.826	1.18393	0.211934	5.58632	2.32e-08	4.27e-07
DSN1	2841.43	-0.688805	0.123346	-5.58433	2.35e-08	4.31e-07
GABRE	5460.47	-1.93564	0.346642	-5.58397	2.35e-08	4.31e-07
QRFPR	65.8143	-6.01109	1.07688	-5.58193	2.38e-08	4.36e-07
CTSW	697.716	-1.9798	0.354826	-5.57964	2.41e-08	4.41e-07
USP31	1838.92	-0.926631	0.166092	-5.57902	2.42e-08	4.43e-07
SLC52A1	588.887	-2.08728	0.374408	-5.57487	2.48e-08	4.53e-07
POC1B-GALNT4	12.6396	1.35179	0.242618	5.57168	2.52e-08	4.61e-07
ACKR4	91.4214	-2.38886	0.428774	-5.57137	2.53e-08	4.61e-07
ZNF814	381.773	1.14648	0.205813	5.5705	2.54e-08	4.63e-07
SLC25A28	3317.08	-0.922079	0.165585	-5.56862	2.57e-08	4.67e-07
TNIP3	139.823	-2.30454	0.413847	-5.56857	2.57e-08	4.67e-07
PLD1	3001.36	-1.37933	0.247727	-5.56793	2.58e-08	4.68e-07
TBC1D15	2568.86	-0.566718	0.101783	-5.56788	2.58e-08	4.68e-07
MTTP	9.5634	2.157	0.387471	5.56687	2.59e-08	4.7e-07
SPATS2L	6981.33	-0.869202	0.156164	-5.56597	2.61e-08	4.72e-07
DEFA5	5.94529	9.96135	1.7898	5.56562	2.61e-08	4.73e-07
KRT17	256513	-2.27198	0.408224	-5.56553	2.61e-08	4.73e-07
TMEM59L	45.9857	2.89809	0.520867	5.56397	2.64e-08	4.77e-07
GRIA4	7.01116	2.77647	0.499043	5.56359	2.64e-08	4.77e-07
SACM1L	1853.45	0.574418	0.103265	5.56256	2.66e-08	4.79e-07
SLC6A11	582.496	-2.84669	0.511752	-5.56265	2.66e-08	4.79e-07
TUBA1A	4358.62	1.53134	0.2755	5.5584	2.72e-08	4.9e-07
EPB41L5	1088.9	0.848262	0.15262	5.55798	2.73e-08	4.9e-07
SLC22A11	6.79085	2.68407	0.482923	5.55796	2.73e-08	4.9e-07
TIPARP	3157.7	-1.20288	0.216476	-5.55666	2.75e-08	4.94e-07
RNF212	1385.49	-2.23669	0.40265	-5.55494	2.78e-08	4.98e-07
MGAT4B	5722.5	0.742866	0.133836	5.55055	2.85e-08	5.1e-07
MFAP3L	261.752	2.14199	0.385924	5.55029	2.85e-08	5.1e-07
LMOD3	7.57907	1.4969	0.26972	5.54984	2.86e-08	5.11e-07
MAP2K6	502.37	1.63033	0.293896	5.54731	2.9e-08	5.18e-07
TUBB4A	46.5544	2.55486	0.460712	5.54545	2.93e-08	5.23e-07
KHDRBS2	2.51363	3.7762	0.681001	5.54507	2.94e-08	5.24e-07
MBNL1	8233.33	-0.636354	0.114761	-5.54503	2.94e-08	5.24e-07
ACOX2	78.1721	2.04969	0.36988	5.54151	3e-08	5.33e-07
IFI44	4677.15	-1.66375	0.300228	-5.54161	3e-08	5.33e-07
CD82	10782.3	-1.16121	0.20957	-5.54091	3.01e-08	5.34e-07
SLC35D3	18.4759	3.10133	0.559785	5.54023	3.02e-08	5.36e-07
GNLY	1822.35	-2.27025	0.409812	-5.53974	3.03e-08	5.37e-07
CES2	4730.2	-1.2608	0.227665	-5.53797	3.06e-08	5.42e-07
SP110	511.362	-1.14846	0.207386	-5.5378	3.06e-08	5.42e-07
ENC1	2076.25	1.53347	0.277095	5.5341	3.13e-08	5.53e-07
PALB2	1416.3	-0.60792	0.109857	-5.53376	3.13e-08	5.54e-07
RNF180	58.2296	2.15002	0.388718	5.53105	3.18e-08	5.62e-07
MEGF11	37.6789	2.18927	0.395911	5.5297	3.21e-08	5.65e-07
NUSAP1	6331.92	-0.790891	0.143032	-5.52945	3.21e-08	5.65e-07
OAS1	7098.4	-1.40862	0.254747	-5.52946	3.21e-08	5.65e-07
OTUD7A	211.375	-1.58672	0.287204	-5.52473	3.3e-08	5.8e-07
NFATC1	964.392	-1.31949	0.238895	-5.52332	3.33e-08	5.84e-07
EGFL7	876.831	1.48264	0.269097	5.5097	3.59e-08	6.31e-07
CCL5	4579.03	-2.02883	0.368342	-5.50801	3.63e-08	6.36e-07
DISC1	218.106	1.40415	0.255035	5.50571	3.68e-08	6.44e-07
PCDHB5	40.0906	2.31911	0.42149	5.50218	3.75e-08	6.56e-07
SH2D1B	59.758	-2.06699	0.375687	-5.50189	3.76e-08	6.57e-07
MCM6	7403.18	-0.597014	0.108548	-5.50001	3.8e-08	6.63e-07
CCDC188	15.9157	1.56651	0.284875	5.49893	3.82e-08	6.67e-07
MOB3C	2002.29	-0.799623	0.145436	-5.49809	3.84e-08	6.69e-07
VSIG10L	1042.77	-2.20128	0.400684	-5.49379	3.93e-08	6.85e-07
MT2A	21713	-1.86667	0.339837	-5.49284	3.96e-08	6.88e-07
SFN	113440	-1.7579	0.320156	-5.49077	4e-08	6.96e-07
COX11	1593.96	0.571329	0.104113	5.48758	4.07e-08	7.07e-07
WNT3A	196.052	-2.39853	0.437072	-5.48773	4.07e-08	7.07e-07
TPBG	4056.29	-1.04477	0.19043	-5.48639	4.1e-08	7.11e-07
VN1R1	18.6167	1.58289	0.288702	5.48278	4.19e-08	7.25e-07
JCHAIN	6173.67	-2.54781	0.464808	-5.48143	4.22e-08	7.3e-07
FABP4	3255.82	-4.20376	0.766965	-5.48104	4.23e-08	7.31e-07
ASB2	762.548	-1.84203	0.336113	-5.48039	4.24e-08	7.33e-07
MZB1	1348.73	-2.43756	0.444806	-5.48005	4.25e-08	7.34e-07
PRSS36	389.532	-1.5189	0.277177	-5.47988	4.26e-08	7.34e-07
ZFP57	189.727	-3.89795	0.711728	-5.47674	4.33e-08	7.46e-07
OPRD1	23.3246	2.19708	0.401233	5.47581	4.36e-08	7.49e-07
FOSL2	16086.6	-0.887681	0.162138	-5.47484	4.38e-08	7.53e-07
NKX2-1	38.3552	4.83972	0.884355	5.4726	4.43e-08	7.62e-07
PRKAG3	3.49661	2.72364	0.498265	5.46625	4.6e-08	7.89e-07
MX1	13809.3	-1.67325	0.3062	-5.46455	4.64e-08	7.96e-07
IFNGR1	6683.71	-0.902668	0.165244	-5.46263	4.69e-08	8.04e-07
SOX4	7528.89	1.13247	0.207337	5.46199	4.71e-08	8.06e-07
DKK4	42.581	2.94892	0.539932	5.46165	4.72e-08	8.07e-07
TESK2	711.786	-1.05371	0.192995	-5.45979	4.77e-08	8.14e-07
NKG7	982.068	-2.05095	0.375703	-5.45897	4.79e-08	8.17e-07
KLK13	1581.71	-3.65358	0.669498	-5.4572	4.84e-08	8.24e-07
MLKL	1069.68	-1.0787	0.197669	-5.45713	4.84e-08	8.24e-07
SCG3	14.9304	3.31577	0.607629	5.45689	4.85e-08	8.25e-07
CTPS2	1382.17	0.893395	0.163757	5.45561	4.88e-08	8.29e-07
FBXO39	52.7163	-2.01187	0.368774	-5.45556	4.88e-08	8.29e-07
ARRDC2	2412.26	-0.961137	0.176186	-5.45524	4.89e-08	8.3e-07
NKX2-8	45.138	-2.68447	0.492165	-5.45441	4.91e-08	8.33e-07
RAB6A	7537.17	0.694309	0.1273	5.4541	4.92e-08	8.34e-07
ACTC1	35.5847	2.55066	0.468091	5.44908	5.06e-08	8.57e-07
SEC22A	1355.59	-0.629166	0.115499	-5.44737	5.11e-08	8.65e-07
CD7	1035.62	-1.80407	0.331264	-5.44603	5.15e-08	8.7e-07
EFHD1	801.262	2.25276	0.413694	5.44546	5.17e-08	8.72e-07
CCDC3	1054.2	1.80595	0.331789	5.44308	5.24e-08	8.82e-07
HUNK	537.025	1.86905	0.343372	5.4432	5.23e-08	8.82e-07
DEF6	2476.12	-0.885275	0.162765	-5.43899	5.36e-08	9.02e-07
TCEA3	3900.63	-1.33613	0.245689	-5.4383	5.38e-08	9.05e-07
RIOK3	6003	-0.753853	0.138735	-5.43375	5.52e-08	9.27e-07
CXCL6	988.328	-3.03853	0.559245	-5.43327	5.53e-08	9.29e-07
SULT1E1	297.066	-3.33367	0.613697	-5.43212	5.57e-08	9.34e-07
ZNF649	316.269	1.37411	0.252966	5.43201	5.57e-08	9.34e-07
FOSL1	2268.52	-1.99335	0.36702	-5.43118	5.6e-08	9.36e-07
KRT6B	26526.7	-3.12678	0.575709	-5.43118	5.6e-08	9.36e-07
MSI1	297.976	2.80448	0.51637	5.43114	5.6e-08	9.36e-07
ZNF589	760.037	0.929575	0.171171	5.43068	5.61e-08	9.38e-07
GDF5	46.9642	3.17997	0.585659	5.42972	5.64e-08	9.42e-07
GNG12	6868.05	-0.883708	0.162788	-5.42858	5.68e-08	9.47e-07
EAF2	377.913	-1.17915	0.217342	-5.42534	5.78e-08	9.64e-07
GRIK4	30.9273	2.76355	0.509506	5.42398	5.83e-08	9.7e-07
CLDND1	5666.99	-0.942786	0.173831	-5.42358	5.84e-08	9.71e-07
EFEMP1	6445.68	-2.57432	0.474662	-5.42349	5.84e-08	9.71e-07
RFC5	2361.87	-0.581426	0.107222	-5.42266	5.87e-08	9.75e-07
WDR86	125.222	1.63409	0.30148	5.42021	5.95e-08	9.87e-07
CUX2	25.0051	2.82245	0.52084	5.41905	5.99e-08	9.93e-07
RALYL	2.72775	4.8566	0.896432	5.4177	6.04e-08	9.99e-07
TP63	15003	-2.60616	0.481042	-5.41774	6.04e-08	9.99e-07
FAM60A	3153.39	0.903772	0.16684	5.41698	6.06e-08	1e-06
CBARP	73.0798	1.71803	0.317197	5.41628	6.09e-08	1e-06
IGDCC4	93.0958	1.67522	0.309369	5.41495	6.13e-08	1.01e-06
STXBP6	464.468	3.10667	0.574122	5.41116	6.26e-08	1.03e-06
KRTAP3-1	20.1425	5.00084	0.924408	5.40977	6.31e-08	1.04e-06
WDR12	1585.05	0.672286	0.124316	5.40789	6.38e-08	1.05e-06
PAK1IP1	1474.16	0.875371	0.161887	5.4073	6.4e-08	1.05e-06
CRB2	58.32	2.88046	0.53292	5.40504	6.48e-08	1.06e-06
AKR1C2	4691.94	-3.13683	0.580639	-5.40238	6.58e-08	1.08e-06
CAMKV	9.10112	3.03639	0.562075	5.4021	6.59e-08	1.08e-06
IL22RA2	65.4075	-2.62965	0.487028	-5.39939	6.69e-08	1.1e-06
ZNF470	150.108	1.86897	0.346237	5.39794	6.74e-08	1.1e-06
TLE6	125.296	2.00937	0.372397	5.39576	6.82e-08	1.12e-06
NPTX1	120.839	3.07676	0.570283	5.39514	6.85e-08	1.12e-06
NXPE2	1.48864	3.35392	0.621698	5.39477	6.86e-08	1.12e-06
C16orf46	61.0003	0.90874	0.168485	5.39359	6.91e-08	1.13e-06
HCAR3	237.294	-2.62394	0.486494	-5.39357	6.91e-08	1.13e-06
TRO	255.592	1.91957	0.355972	5.39247	6.95e-08	1.13e-06
PTDSS2	1352.67	0.947212	0.175702	5.391	7.01e-08	1.14e-06
FAF1	4189.89	-0.566779	0.10514	-5.3907	7.02e-08	1.14e-06
ARNTL2	4427.56	-1.2915	0.239594	-5.39036	7.03e-08	1.14e-06
INPP5F	2303.45	-1.15594	0.214612	-5.38618	7.2e-08	1.17e-06
NUGGC	52.0781	-2.00861	0.372915	-5.38622	7.2e-08	1.17e-06
DCLK2	130.852	1.55681	0.28911	5.38481	7.25e-08	1.17e-06
TCAF2	402.689	-1.37982	0.256244	-5.3848	7.25e-08	1.17e-06
DUT	5572.82	-0.788149	0.146414	-5.38301	7.33e-08	1.18e-06
C19orf38	173.004	-1.55724	0.289353	-5.38181	7.37e-08	1.19e-06
VSIG8	53.061	2.32659	0.432619	5.37793	7.53e-08	1.22e-06
DPCR1	164.569	-4.13165	0.768506	-5.37621	7.61e-08	1.23e-06
CRISPLD1	212.548	2.62062	0.487486	5.37578	7.63e-08	1.23e-06
TMED4	4979.59	0.506338	0.0942065	5.37476	7.67e-08	1.23e-06
KLHL8	1050.67	0.807673	0.150304	5.37359	7.72e-08	1.24e-06
SYNM	1044.29	-1.37616	0.256257	-5.37022	7.86e-08	1.26e-06
UBFD1	2993.68	0.64776	0.120629	5.36987	7.88e-08	1.27e-06
ANGEL1	1103.26	0.762179	0.141982	5.36813	7.96e-08	1.28e-06
FGF17	35.178	2.17586	0.405335	5.36807	7.96e-08	1.28e-06
CLSTN2	264.662	2.25625	0.420388	5.36706	8e-08	1.28e-06
MYLIP	1906.27	1.08285	0.201838	5.36494	8.1e-08	1.3e-06
TM4SF19	149.827	-2.58911	0.482714	-5.36365	8.16e-08	1.3e-06
CCL22	455.282	-1.82814	0.34086	-5.3633	8.17e-08	1.31e-06
DHRS9	420.418	-2.60018	0.484954	-5.36171	8.24e-08	1.32e-06
IL12B	15.1364	-2.14773	0.400577	-5.36159	8.25e-08	1.32e-06
PCLAF	3714.71	-0.867382	0.161784	-5.36134	8.26e-08	1.32e-06
PLSCR4	1169.86	-1.47397	0.275019	-5.35952	8.34e-08	1.33e-06
COL23A1	225.811	2.25281	0.420376	5.35904	8.37e-08	1.33e-06
ZNF788	82.7603	1.98155	0.369782	5.3587	8.38e-08	1.33e-06
NLN	1400.61	0.792346	0.147956	5.3553	8.54e-08	1.36e-06
ZNF43	266.084	2.00884	0.375273	5.35299	8.65e-08	1.37e-06
AZIN1	7568.56	0.687108	0.128441	5.34958	8.82e-08	1.4e-06
TMEM246	1444.24	-1.71105	0.319839	-5.34971	8.81e-08	1.4e-06
IRF4	312.881	-1.85723	0.347209	-5.34902	8.84e-08	1.4e-06
PERM1	355.756	-1.63104	0.305008	-5.34754	8.92e-08	1.41e-06
CMPK2	1304.16	-1.54478	0.288906	-5.34699	8.94e-08	1.41e-06
HOOK3	2040.36	0.666186	0.124595	5.34682	8.95e-08	1.41e-06
PPP1R1A	40.6714	2.60553	0.48733	5.34655	8.96e-08	1.41e-06
PTPRG	1227.99	1.54272	0.288543	5.34656	8.96e-08	1.41e-06
TMC8	1365.08	-1.37214	0.256659	-5.34619	8.98e-08	1.41e-06
CNMD	2.25877	4.07749	0.762717	5.34601	8.99e-08	1.41e-06
ANXA8L1	2049.11	-2.31009	0.432315	-5.34354	9.11e-08	1.43e-06
NUP62CL	374.228	-1.2143	0.227282	-5.34273	9.16e-08	1.44e-06
DUSP1	13970	-1.79914	0.336829	-5.34141	9.22e-08	1.45e-06
BCORL1	965.971	0.879756	0.164731	5.34055	9.27e-08	1.45e-06
CYP27C1	493.835	-2.3848	0.446611	-5.33976	9.31e-08	1.46e-06
TUBB6	9379.67	-1.54454	0.289298	-5.33893	9.35e-08	1.46e-06
KCTD9	1830.65	-0.802956	0.150427	-5.33785	9.41e-08	1.47e-06
KCNJ13	2.6881	2.54529	0.476995	5.3361	9.5e-08	1.48e-06
C20orf96	478.07	1.14165	0.213962	5.33576	9.51e-08	1.49e-06
TMEM178A	178.73	2.77625	0.52034	5.33546	9.53e-08	1.49e-06
CHRND	4.68892	3.89049	0.729223	5.33513	9.55e-08	1.49e-06
KCNH3	216.756	2.49153	0.467034	5.3348	9.57e-08	1.49e-06
FAM118B	694.632	0.781347	0.14647	5.33452	9.58e-08	1.49e-06
MED28	2683.98	0.580302	0.108785	5.33439	9.59e-08	1.49e-06
HRH3	3.06176	2.64644	0.496393	5.33134	9.75e-08	1.51e-06
FAM184A	235.571	-1.69401	0.317925	-5.32833	9.91e-08	1.54e-06
HIST1H2BJ	517.165	-1.66468	0.312418	-5.32838	9.91e-08	1.54e-06
POU2AF1	693.679	-2.09415	0.393084	-5.32748	9.96e-08	1.54e-06
KRTAP1-1	0.594418	4.6149	0.866307	5.32709	9.98e-08	1.55e-06
LRR1	1073.22	-0.603996	0.113403	-5.3261	1e-07	1.55e-06
SAMD11	185.261	2.35408	0.442129	5.32443	1.01e-07	1.57e-06
LARS2	1290.5	0.711707	0.133734	5.32182	1.03e-07	1.59e-06
SMARCD3	568.044	1.38959	0.261229	5.31943	1.04e-07	1.61e-06
CCL19	589.713	-2.80765	0.527914	-5.31838	1.05e-07	1.61e-06
IFNL3	4.11776	-3.73718	0.702696	-5.31835	1.05e-07	1.61e-06
TP73	1440.88	-1.34748	0.253391	-5.31778	1.05e-07	1.62e-06
SORCS3	6.55997	5.73812	1.07931	5.31646	1.06e-07	1.63e-06
FBXO16	53.5512	2.46106	0.463019	5.31525	1.07e-07	1.64e-06
PRAME	1214.15	3.9202	0.737613	5.3147	1.07e-07	1.64e-06
STS	1605.63	-1.40141	0.263849	-5.31139	1.09e-07	1.67e-06
PTCD3	3335.63	0.514922	0.0969693	5.31015	1.1e-07	1.68e-06
MAPK6	5204.23	-0.957941	0.180418	-5.30956	1.1e-07	1.68e-06
STAT4	260.856	-1.42473	0.268337	-5.30947	1.1e-07	1.68e-06
FZD5	973.316	1.27781	0.240697	5.30878	1.1e-07	1.69e-06
MUC3A	256.484	-2.87415	0.541545	-5.30731	1.11e-07	1.7e-06
NUP50	4987.35	-0.585389	0.110324	-5.30608	1.12e-07	1.71e-06
EVPLL	41.1806	-2.15773	0.406701	-5.30544	1.12e-07	1.72e-06
PANK1	514.459	0.991746	0.186937	5.30523	1.13e-07	1.72e-06
MCM4	14061.5	-0.582305	0.109786	-5.30399	1.13e-07	1.73e-06
SERPINE1	6096.14	-2.10018	0.395994	-5.30356	1.14e-07	1.73e-06
MYEF2	335.208	2.59501	0.4896	5.30026	1.16e-07	1.76e-06
CCNG1	3078.21	0.751592	0.141834	5.29909	1.16e-07	1.77e-06
DENND4A	1385.03	-0.631587	0.119219	-5.2977	1.17e-07	1.78e-06
TSPOAP1	1101.46	1.55308	0.293176	5.29743	1.17e-07	1.78e-06
TMPRSS5	30.1525	1.66374	0.314273	5.29394	1.2e-07	1.81e-06
IFIT3	4184.93	-1.71145	0.323341	-5.29302	1.2e-07	1.82e-06
IFT88	482.399	0.815015	0.153998	5.29236	1.21e-07	1.83e-06
ITGA2	6045.57	-1.61287	0.304815	-5.2913	1.21e-07	1.84e-06
TMOD3	6937.12	-0.809771	0.153079	-5.28988	1.22e-07	1.85e-06
ACAA2	1418.4	1.50682	0.284876	5.28939	1.23e-07	1.85e-06
ARF6	13397.8	-0.615212	0.116321	-5.28893	1.23e-07	1.86e-06
GBP1	8990.32	-1.72813	0.326758	-5.28872	1.23e-07	1.86e-06
SDC4	25014.3	-1.00584	0.19021	-5.28803	1.24e-07	1.86e-06
ALOX12B	347.022	-2.9243	0.553055	-5.28755	1.24e-07	1.86e-06
PRDM8	155.742	-1.61249	0.304968	-5.2874	1.24e-07	1.86e-06
SND1	10493.1	0.591559	0.111877	5.28756	1.24e-07	1.86e-06
ZNF286A	295.774	0.745258	0.140991	5.28587	1.25e-07	1.88e-06
KRT6C	14272.4	-3.60962	0.682943	-5.28539	1.25e-07	1.88e-06
LRRC8A	10148.5	-1.0768	0.203808	-5.28338	1.27e-07	1.9e-06
ARHGAP10	925.988	-1.01285	0.19172	-5.28295	1.27e-07	1.9e-06
SYCE2	239.101	-1.55459	0.294273	-5.2828	1.27e-07	1.9e-06
CYS1	190.087	1.8684	0.353731	5.28199	1.28e-07	1.91e-06
MEN1	2691.28	0.484085	0.0916799	5.28017	1.29e-07	1.93e-06
SPRR2B	98.6004	-4.70726	0.89154	-5.27992	1.29e-07	1.93e-06
AC104581.1	598.068	-0.895437	0.169673	-5.27743	1.31e-07	1.95e-06
EML2	4451.97	-0.916281	0.17365	-5.2766	1.32e-07	1.96e-06
KLHL41	10.805	1.45011	0.274817	5.27665	1.32e-07	1.96e-06
TMEM200C	65.8052	2.66084	0.504374	5.27553	1.32e-07	1.97e-06
PERP	83099.3	-1.42959	0.271002	-5.27519	1.33e-07	1.97e-06
CTRC	15.0504	-1.96495	0.372543	-5.27441	1.33e-07	1.98e-06
MID2	403.871	-1.23835	0.234807	-5.27391	1.34e-07	1.98e-06
HSD3B7	1162.69	-1.17643	0.223182	-5.27119	1.36e-07	2.01e-06
PNMA8C	0.990896	3.00092	0.569462	5.26974	1.37e-07	2.03e-06
PTGES	4103.91	-1.97156	0.374207	-5.26865	1.37e-07	2.04e-06
SYTL1	4487.45	-1.24619	0.236567	-5.26782	1.38e-07	2.04e-06
TRIM69	3050.12	-0.969795	0.184097	-5.26784	1.38e-07	2.04e-06
MOCS1	423.022	1.82309	0.346269	5.26496	1.4e-07	2.07e-06
CCK	50.356	-3.5076	0.666306	-5.26425	1.41e-07	2.08e-06
PER3	2339.94	-1.36872	0.260018	-5.26395	1.41e-07	2.08e-06
CCR7	300.498	-1.80627	0.343325	-5.26111	1.43e-07	2.11e-06
HIST2H4A	32.0424	-1.63774	0.311299	-5.261	1.43e-07	2.11e-06
CHD4	13383.1	0.449934	0.0855933	5.25665	1.47e-07	2.16e-06
LDOC1	655.198	2.48744	0.473405	5.25437	1.49e-07	2.18e-06
MAGI1	847.897	1.23684	0.235487	5.25229	1.5e-07	2.21e-06
CD1A	313.118	-2.54427	0.484448	-5.2519	1.51e-07	2.21e-06
TPSB2	650.717	-2.27926	0.434036	-5.25132	1.51e-07	2.22e-06
UBA7	3892.28	-1.17222	0.223269	-5.25025	1.52e-07	2.23e-06
TMEM54	8118.76	-1.10162	0.209848	-5.24959	1.52e-07	2.23e-06
FAAP24	477.96	-0.750163	0.142912	-5.24914	1.53e-07	2.24e-06
FAM166B	43.6931	1.74231	0.332032	5.24741	1.54e-07	2.26e-06
CCL17	80.752	-1.93068	0.36801	-5.24628	1.55e-07	2.27e-06
RARRES1	5861.4	-2.85232	0.54376	-5.24556	1.56e-07	2.28e-06
IRX3	2437.74	-1.36927	0.261049	-5.24525	1.56e-07	2.28e-06
POLA1	2255.4	-0.710169	0.135488	-5.24156	1.59e-07	2.32e-06
NHLRC4	28.108	1.64529	0.313928	5.24099	1.6e-07	2.33e-06
RXFP4	7.97364	2.79539	0.533492	5.2398	1.61e-07	2.34e-06
PER1	3682.92	-1.36702	0.260929	-5.23905	1.61e-07	2.35e-06
MUC5AC	2128.91	-4.5328	0.865299	-5.23841	1.62e-07	2.35e-06
EHMT2	5433.25	0.651286	0.124441	5.23371	1.66e-07	2.41e-06
C19orf47	1420.33	-0.648289	0.123876	-5.23337	1.66e-07	2.42e-06
APEX2	3396.48	-0.611158	0.116868	-5.22949	1.7e-07	2.47e-06
PADI1	1376.71	-2.80707	0.536793	-5.22934	1.7e-07	2.47e-06
MDGA2	1.209	3.4552	0.660767	5.22908	1.7e-07	2.47e-06
PNPLA5	4.21335	4.95404	0.947602	5.22797	1.71e-07	2.48e-06
SLC12A6	3324.02	-1.22093	0.233556	-5.22757	1.72e-07	2.48e-06
MUC4	18298.1	-2.46694	0.471957	-5.22704	1.72e-07	2.49e-06
SPON1	831.816	2.3863	0.456642	5.22576	1.73e-07	2.5e-06
SIRT3	886.76	0.591574	0.113207	5.2256	1.74e-07	2.5e-06
CLCA1	1.31336	3.69215	0.70677	5.22398	1.75e-07	2.52e-06
SLC39A8	1978.29	1.51672	0.290394	5.22298	1.76e-07	2.54e-06
NFKB1	4689.24	-0.806521	0.154425	-5.22274	1.76e-07	2.54e-06
NBPF1	672.641	0.83969	0.160872	5.21962	1.79e-07	2.58e-06
PKIB	374.868	-1.80385	0.345627	-5.21906	1.8e-07	2.58e-06
C16orf89	119.61	3.29041	0.630704	5.21705	1.82e-07	2.61e-06
OTOR	0.816735	5.18101	0.993411	5.21538	1.83e-07	2.63e-06
SLC7A6	616.879	0.888588	0.170424	5.21397	1.85e-07	2.65e-06
TLR2	1133.66	-1.22786	0.235549	-5.21276	1.86e-07	2.67e-06
KCNK16	1.58444	7.54215	1.447	5.21227	1.87e-07	2.67e-06
TBC1D2	4156.97	-1.14104	0.218963	-5.2111	1.88e-07	2.69e-06
RIMS4	60.6034	3.28742	0.630974	5.21007	1.89e-07	2.7e-06
SERPINA3	78.3329	-3.04517	0.584882	-5.20648	1.92e-07	2.75e-06
OLR1	1054.4	-2.43184	0.467137	-5.20583	1.93e-07	2.76e-06
APBA2	289.464	1.78138	0.342274	5.20453	1.94e-07	2.77e-06
RFPL4B	0.984557	3.71898	0.714625	5.20411	1.95e-07	2.78e-06
ZNF286B	69.9313	0.899498	0.172879	5.20305	1.96e-07	2.79e-06
SERPINB10	27.6767	-2.77819	0.534105	-5.20157	1.98e-07	2.81e-06
CARMIL3	130.123	1.43251	0.275452	5.20059	1.99e-07	2.82e-06
ZNF578	7.82604	1.66742	0.320662	5.19993	1.99e-07	2.83e-06
TRIM24	1925.19	0.94783	0.182377	5.19709	2.02e-07	2.87e-06
CABIN1	3920.41	0.573622	0.110378	5.1969	2.03e-07	2.87e-06
USP15	3041.81	-0.561842	0.108122	-5.19636	2.03e-07	2.88e-06
PEX5	2066.87	0.676376	0.130241	5.19327	2.07e-07	2.93e-06
SOX3	2.38946	5.63482	1.08503	5.19322	2.07e-07	2.93e-06
DST	17137.2	-1.71937	0.331108	-5.19277	2.07e-07	2.93e-06
TEX30	1145.19	-0.785593	0.151309	-5.19198	2.08e-07	2.94e-06
TLX2	116.991	-1.86553	0.359461	-5.1898	2.11e-07	2.97e-06
PAPD5	934.024	0.636718	0.122692	5.18955	2.11e-07	2.97e-06
CAPN6	250.339	3.47967	0.67074	5.18781	2.13e-07	3e-06
SERHL2	124.035	0.927543	0.178936	5.18365	2.18e-07	3.07e-06
SCO2	2656.01	-1.27422	0.245929	-5.18125	2.2e-07	3.1e-06
CDC42BPG	3742.16	-0.798519	0.154188	-5.17886	2.23e-07	3.14e-06
HCN1	1.8822	4.12957	0.797514	5.17805	2.24e-07	3.15e-06
TRIM54	214.768	-3.36475	0.649836	-5.17784	2.24e-07	3.15e-06
FAM129A	3811.14	-1.40001	0.270498	-5.17567	2.27e-07	3.19e-06
MSX1	554.859	2.38617	0.461153	5.17436	2.29e-07	3.21e-06
APOL6	5678.48	-1.15578	0.223379	-5.1741	2.29e-07	3.21e-06
KNTC1	3549.02	-0.641116	0.123931	-5.17318	2.3e-07	3.22e-06
YARS2	1053.16	0.599449	0.115884	5.17283	2.31e-07	3.23e-06
AHNAK2	8560.92	-1.74464	0.337456	-5.16997	2.34e-07	3.27e-06
BEX5	88.2559	2.51451	0.486422	5.16941	2.35e-07	3.28e-06
ASPSCR1	2335.89	1.01321	0.196029	5.1687	2.36e-07	3.29e-06
CAPN14	477.022	-2.86722	0.554992	-5.16623	2.39e-07	3.33e-06
PCDHA6	8.90695	3.091	0.598342	5.16594	2.39e-07	3.34e-06
SLC4A7	965.9	1.10053	0.213055	5.16548	2.4e-07	3.34e-06
OMG	17.8413	1.43492	0.277902	5.16341	2.42e-07	3.38e-06
GUCA1A	5.1412	2.29929	0.445404	5.16224	2.44e-07	3.39e-06
LARGE2	1668.02	1.42235	0.275707	5.15893	2.48e-07	3.45e-06
KPRP	60.4242	-3.97715	0.771036	-5.15819	2.49e-07	3.46e-06
SEPHS1	3333.49	0.51596	0.100042	5.15743	2.5e-07	3.48e-06
SLC35F5	2047.78	0.814138	0.157887	5.15646	2.52e-07	3.49e-06
KCNH8	34.871	3.15731	0.612333	5.15619	2.52e-07	3.49e-06
UBXN2B	1383.3	0.632427	0.122674	5.15535	2.53e-07	3.51e-06
HMGXB3	2622.01	0.510926	0.0991435	5.1534	2.56e-07	3.54e-06
RNASEL	1024.46	-0.943084	0.183035	-5.15248	2.57e-07	3.56e-06
DOCK5	1944.71	-1.1396	0.221253	-5.15065	2.6e-07	3.59e-06
PINLYP	359.862	-1.69594	0.329564	-5.14602	2.66e-07	3.67e-06
IRF7	3812.03	-1.25952	0.24477	-5.14574	2.66e-07	3.67e-06
KRT81	1067.18	-3.02571	0.588004	-5.14574	2.66e-07	3.67e-06
MAP3K14	1454.31	-0.99054	0.192509	-5.14543	2.67e-07	3.68e-06
C1orf189	4.37707	2.00137	0.388992	5.145	2.68e-07	3.68e-06
SLC17A7	91.0409	2.33253	0.45336	5.14498	2.68e-07	3.68e-06
PCBP4	1613.02	0.889846	0.172964	5.14468	2.68e-07	3.68e-06
SMTNL2	70.5236	2.992	0.581583	5.14459	2.68e-07	3.68e-06
SLC5A9	40.6614	2.45881	0.478092	5.14297	2.7e-07	3.71e-06
TNS3	3149.68	1.22562	0.238309	5.14301	2.7e-07	3.71e-06
DLGAP1	107.745	3.09608	0.602101	5.14212	2.72e-07	3.72e-06
PCSK1N	174.297	2.9422	0.572169	5.14219	2.72e-07	3.72e-06
RGPD4	1.24286	2.20224	0.428255	5.14235	2.71e-07	3.72e-06
ZNF549	156.486	1.87944	0.365559	5.14129	2.73e-07	3.73e-06
ZNF66	20.7879	2.42864	0.472417	5.14087	2.73e-07	3.74e-06
IL17D	48.8688	1.28236	0.249538	5.13893	2.76e-07	3.77e-06
SNX33	4010.5	-0.910775	0.17723	-5.13895	2.76e-07	3.77e-06
BAIAP2	5667.59	-1.01891	0.198308	-5.13801	2.78e-07	3.79e-06
ZMYM3	2021.79	0.797147	0.155189	5.13663	2.8e-07	3.81e-06
DENND2D	2433.44	-0.674306	0.131278	-5.13646	2.8e-07	3.81e-06
ADSSL1	1093.99	-1.55822	0.303398	-5.1359	2.81e-07	3.82e-06
C6orf15	165.304	3.91059	0.761412	5.13597	2.81e-07	3.82e-06
NUDT16L1	1251.97	0.715475	0.139324	5.13533	2.82e-07	3.83e-06
CCND1	5024	1.76953	0.344596	5.1351	2.82e-07	3.83e-06
GUCA2A	3.51708	5.48454	1.06857	5.13258	2.86e-07	3.88e-06
MLLT6	8006.39	0.661559	0.128908	5.13202	2.87e-07	3.89e-06
DUSP5	3481.86	-1.62181	0.31625	-5.12827	2.92e-07	3.96e-06
C2orf40	28.534	2.79603	0.545326	5.12726	2.94e-07	3.98e-06
TIAM1	2299.76	-1.2449	0.242807	-5.12709	2.94e-07	3.98e-06
CYB5R1	5873.9	-1.07009	0.208855	-5.12363	3e-07	4.05e-06
KRT86	290.008	-1.53704	0.300097	-5.1218	3.03e-07	4.09e-06
PYGM	43.5761	1.26036	0.246074	5.12188	3.03e-07	4.09e-06
CEP152	702.986	-0.730158	0.142605	-5.12013	3.05e-07	4.12e-06
KIAA1958	490.903	0.861318	0.168232	5.11983	3.06e-07	4.12e-06
KRT39	9.36383	2.68416	0.524276	5.11975	3.06e-07	4.12e-06
PRPS2	5052.67	-0.76078	0.148629	-5.11866	3.08e-07	4.14e-06
L1TD1	10.1447	2.19419	0.428682	5.11845	3.08e-07	4.14e-06
EFS	3292.64	-1.48836	0.290808	-5.118	3.09e-07	4.15e-06
RAB8B	1186.8	-0.732096	0.143053	-5.11766	3.09e-07	4.16e-06
DDX60	3270.37	-1.4197	0.27746	-5.11677	3.11e-07	4.17e-06
RAB38	1551.13	-1.72375	0.336913	-5.1163	3.12e-07	4.18e-06
GABRA3	252.694	2.97525	0.581548	5.11608	3.12e-07	4.18e-06
L3MBTL3	372.028	1.01398	0.198207	5.11578	3.12e-07	4.19e-06
SCAP	4730.07	0.604302	0.118128	5.11564	3.13e-07	4.19e-06
TSEN2	495.298	0.72793	0.142302	5.1154	3.13e-07	4.19e-06
CNTN3	30.8198	2.72957	0.533788	5.11358	3.16e-07	4.23e-06
APOBEC3H	74.128	-1.43788	0.281204	-5.11331	3.17e-07	4.23e-06
SYN3	12.6986	2.36168	0.462203	5.10961	3.23e-07	4.31e-06
CD8B	440.97	2.1052	0.412088	5.10861	3.25e-07	4.33e-06
SAMD9L	2002.14	-1.48485	0.290735	-5.10722	3.27e-07	4.36e-06
SLC30A9	2699.8	0.599775	0.117483	5.10519	3.3e-07	4.4e-06
MMP1	4207.09	-2.72439	0.533901	-5.1028	3.35e-07	4.45e-06
NANOS3	23.0518	1.46887	0.287973	5.10071	3.38e-07	4.5e-06
POLR1A	3097.97	0.584588	0.114636	5.0995	3.41e-07	4.53e-06
HMGN2	19962.5	-0.673181	0.132054	-5.09777	3.44e-07	4.56e-06
C14orf37	125.995	1.53903	0.301935	5.09723	3.45e-07	4.57e-06
C20orf141	7.28144	-4.41156	0.865481	-5.09723	3.45e-07	4.57e-06
LGSN	10.4532	3.97315	0.779523	5.0969	3.45e-07	4.58e-06
LRP6	1466.2	0.883518	0.173373	5.09604	3.47e-07	4.59e-06
VPS54	1777.54	0.527785	0.103599	5.0945	3.5e-07	4.63e-06
SCUBE3	200.772	2.28569	0.44884	5.09242	3.54e-07	4.68e-06
ANXA1	55985.6	-1.48722	0.29236	-5.08695	3.64e-07	4.81e-06
TMEM30B	3973.39	-0.872101	0.171438	-5.08698	3.64e-07	4.81e-06
INHBB	600.57	2.23421	0.439281	5.08605	3.66e-07	4.82e-06
STEAP3	3840.75	-0.956278	0.188017	-5.08611	3.65e-07	4.82e-06
SPINK6	308.318	-4.57446	0.89958	-5.0851	3.67e-07	4.84e-06
SLC6A16	76.6963	1.43067	0.281375	5.08456	3.68e-07	4.85e-06
SLC10A3	3524.83	-0.737815	0.145113	-5.08441	3.69e-07	4.85e-06
CRNN	1668.76	-4.90571	0.965115	-5.08304	3.71e-07	4.88e-06
PCMTD2	2705.44	0.720677	0.141777	5.08316	3.71e-07	4.88e-06
SMARCE1	3500.92	0.533529	0.104972	5.08259	3.72e-07	4.89e-06
CMTM7	1050.73	1.60192	0.315189	5.08241	3.73e-07	4.89e-06
MST1	335.997	1.10296	0.21723	5.07738	3.83e-07	5.02e-06
BMPR1A	1380.15	0.659563	0.129914	5.07693	3.84e-07	5.03e-06
ZNF627	618.111	0.700444	0.137971	5.07676	3.84e-07	5.03e-06
CARD6	1071.6	-1.44439	0.284769	-5.07213	3.93e-07	5.14e-06
POLQ	1483.15	-0.784839	0.154732	-5.07225	3.93e-07	5.14e-06
KRT38	3.89658	3.73091	0.735748	5.07091	3.96e-07	5.17e-06
STPG3	23.2859	1.85246	0.365325	5.07071	3.96e-07	5.18e-06
UBR7	3308.97	-0.612152	0.120742	-5.06994	3.98e-07	5.19e-06
STK33	81.8812	2.33891	0.461391	5.06925	3.99e-07	5.21e-06
KLRF2	15.1575	-3.22562	0.636522	-5.06757	4.03e-07	5.25e-06
GZMA	930.607	-1.84239	0.363583	-5.06732	4.03e-07	5.25e-06
RIBC2	791.655	-1.22334	0.241495	-5.0657	4.07e-07	5.3e-06
PIEZO2	88.6248	2.00596	0.396013	5.06538	4.08e-07	5.3e-06
HIRIP3	2099.72	-0.698265	0.137909	-5.06323	4.12e-07	5.36e-06
SLAMF7	1127.05	-1.71594	0.338934	-5.06275	4.13e-07	5.37e-06
PRTG	39.8697	2.39075	0.472395	5.06092	4.17e-07	5.41e-06
TNFAIP1	5809.97	-0.600626	0.118683	-5.06074	4.18e-07	5.42e-06
NEK10	25.318	1.61982	0.320142	5.0597	4.2e-07	5.44e-06
HLA-E	49882.3	-1.05275	0.208209	-5.05622	4.28e-07	5.54e-06
NEU3	531.203	0.700754	0.138594	5.05616	4.28e-07	5.54e-06
C6orf52	46.5478	1.47497	0.291773	5.0552	4.3e-07	5.56e-06
LCN12	129.335	2.06941	0.409353	5.05531	4.3e-07	5.56e-06
SMO	1284.81	1.62057	0.320691	5.05338	4.34e-07	5.6e-06
TNFRSF11B	257.341	2.60667	0.515825	5.05339	4.34e-07	5.6e-06
B3GLCT	1059.23	-0.735287	0.145515	-5.05299	4.35e-07	5.61e-06
GGT2	4.49448	3.14023	0.621824	5.05003	4.42e-07	5.69e-06
SLC11A2	3078.63	0.820266	0.162434	5.04985	4.42e-07	5.69e-06
RTP4	1158.76	-1.51922	0.300889	-5.0491	4.44e-07	5.71e-06
F3	10466.8	-2.08989	0.413988	-5.04819	4.46e-07	5.74e-06
LRRC27	328.155	0.908099	0.179907	5.04762	4.47e-07	5.75e-06
WDR87	62.7276	-4.32968	0.858033	-5.04605	4.51e-07	5.79e-06
ATP4A	3.6217	3.09411	0.613288	5.04511	4.53e-07	5.82e-06
INSC	6.93738	2.25172	0.446399	5.0442	4.55e-07	5.84e-06
CLCNKA	18.7202	2.16426	0.429128	5.04339	4.57e-07	5.86e-06
ZNF267	1010.5	-0.584891	0.11597	-5.04346	4.57e-07	5.86e-06
MEIG1	11.8161	1.52195	0.301786	5.04316	4.58e-07	5.86e-06
TMEM52B	137.147	-2.53797	0.503254	-5.04312	4.58e-07	5.86e-06
APOL1	33418.4	-1.74049	0.345164	-5.04251	4.59e-07	5.87e-06
LCE3D	174.833	-4.21663	0.836218	-5.0425	4.59e-07	5.87e-06
PSMB10	2660.55	-1.12471	0.223059	-5.0422	4.6e-07	5.87e-06
SLF1	905.514	-0.761647	0.151055	-5.0422	4.6e-07	5.87e-06
MAN1A1	1637.24	1.4222	0.282091	5.04165	4.62e-07	5.88e-06
SLC37A2	1391.09	-1.71396	0.339966	-5.04157	4.62e-07	5.88e-06
TLR3	744.544	-1.28577	0.255353	-5.03529	4.77e-07	6.07e-06
HSPBAP1	940.003	-0.776693	0.154289	-5.03403	4.8e-07	6.11e-06
COX18	749.857	0.627946	0.124942	5.0259	5.01e-07	6.36e-06
HBEGF	1993.94	-1.64355	0.327019	-5.02584	5.01e-07	6.36e-06
STT3B	8957.15	0.616404	0.122643	5.02599	5.01e-07	6.36e-06
TMEM71	262.739	-1.86285	0.370944	-5.02191	5.12e-07	6.49e-06
KRT20	10.2422	2.92887	0.583454	5.01988	5.17e-07	6.55e-06
S100A5	24.2665	1.61201	0.321124	5.0199	5.17e-07	6.55e-06
C8orf74	18.8102	-2.89398	0.576687	-5.01828	5.21e-07	6.6e-06
VHL	2168.63	0.77469	0.154391	5.01771	5.23e-07	6.62e-06
SPRY2	963.743	1.45608	0.290237	5.01687	5.25e-07	6.64e-06
LINS1	1012.24	-0.598332	0.119279	-5.01622	5.27e-07	6.66e-06
SPRR2G	161.122	-4.29075	0.855567	-5.0151	5.3e-07	6.69e-06
AC112229.3	22.5214	1.99679	0.398209	5.01444	5.32e-07	6.71e-06
KMT5B	2564.69	0.574393	0.114579	5.01309	5.36e-07	6.75e-06
CLECL1	31.5232	-1.63974	0.327319	-5.0096	5.45e-07	6.87e-06
ADSL	2886.04	0.630296	0.125888	5.00679	5.53e-07	6.97e-06
FAM200A	454.558	0.585219	0.116918	5.00539	5.57e-07	7.02e-06
CCDC13	33.3047	1.49608	0.298927	5.00482	5.59e-07	7.03e-06
SYT15	26.374	-1.94492	0.388661	-5.00416	5.61e-07	7.05e-06
BLZF1	1706.72	-0.683772	0.136757	-4.9999	5.74e-07	7.2e-06
PDE1C	25.8964	2.03566	0.407288	4.99808	5.79e-07	7.27e-06
LDB2	315.888	1.23895	0.247896	4.99787	5.8e-07	7.27e-06
SEZ6	6.09804	2.3433	0.468867	4.99779	5.8e-07	7.27e-06
CXCL13	1150.67	-2.44487	0.489256	-4.99712	5.82e-07	7.29e-06
FLRT1	40.0911	1.35883	0.27199	4.99589	5.86e-07	7.33e-06
HOXD11	417.537	-2.09918	0.420305	-4.99442	5.9e-07	7.38e-06
BAZ1A	4519.83	-0.750954	0.150377	-4.9938	5.92e-07	7.4e-06
DUSP7	6264.89	-1.32699	0.26591	-4.99038	6.03e-07	7.53e-06
TMEM51	2494.72	-0.825321	0.165387	-4.99025	6.03e-07	7.53e-06
NCR3	42.6379	-1.77956	0.356625	-4.99001	6.04e-07	7.53e-06
CAV1	6720.94	-1.80077	0.361063	-4.9874	6.12e-07	7.63e-06
HAUS4	1598.21	-0.631193	0.126584	-4.98635	6.15e-07	7.67e-06
ADAM8	3508.52	-1.44373	0.289569	-4.98579	6.17e-07	7.68e-06
NOVA2	77.6524	1.10329	0.221333	4.98476	6.2e-07	7.72e-06
ACTR8	1017.4	0.547916	0.109974	4.98223	6.29e-07	7.81e-06
IL1A	882.337	-2.6736	0.536628	-4.98223	6.29e-07	7.81e-06
INTS7	2590.91	-0.519925	0.104406	-4.97985	6.36e-07	7.9e-06
SOD3	649.379	1.49159	0.299574	4.97904	6.39e-07	7.93e-06
NEURL1B	4992.14	-1.09886	0.220734	-4.9782	6.42e-07	7.95e-06
SHF	272.11	1.43007	0.287266	4.97823	6.42e-07	7.95e-06
SYNE2	11203.2	-0.808493	0.162409	-4.97812	6.42e-07	7.95e-06
CASP14	11925.3	-3.77935	0.759384	-4.97686	6.46e-07	8e-06
BLVRA	2907.34	-0.815575	0.163885	-4.9765	6.47e-07	8.01e-06
ZNF491	23.2859	1.57204	0.31594	4.97575	6.5e-07	8.03e-06
B3GALT2	12.7625	2.11111	0.424343	4.97502	6.52e-07	8.06e-06
HOXD13	452.571	-2.36281	0.474951	-4.97485	6.53e-07	8.06e-06
GPM6A	16.4973	2.50008	0.502721	4.9731	6.59e-07	8.13e-06
HNRNPCL2	0.620819	2.10603	0.423516	4.97271	6.6e-07	8.14e-06
ZNF280B	84.7267	2.32536	0.467707	4.97183	6.63e-07	8.17e-06
DENND2C	1380.94	-1.90889	0.383982	-4.97129	6.65e-07	8.19e-06
CCDC86	1528.12	0.739741	0.148818	4.97079	6.67e-07	8.2e-06
IL1RAP	2768.66	-1.37677	0.276982	-4.9706	6.67e-07	8.21e-06
VPS9D1	1762.37	-0.908042	0.18276	-4.96848	6.75e-07	8.29e-06
ZMYM2	3763.44	0.641681	0.129162	4.96802	6.76e-07	8.31e-06
AGPAT1	2845.38	0.59553	0.119891	4.96725	6.79e-07	8.32e-06
ALOXE3	225.98	-2.411	0.485352	-4.96753	6.78e-07	8.32e-06
DNMT3L	0.893997	3.83881	0.772806	4.96736	6.79e-07	8.32e-06
SORBS1	610.476	1.53311	0.30864	4.96731	6.79e-07	8.32e-06
CLEC10A	204.657	-1.97589	0.397907	-4.9657	6.85e-07	8.38e-06
ADGRA3	1606.33	1.13359	0.22836	4.96404	6.9e-07	8.44e-06
SELENOV	2.92362	3.96306	0.798556	4.96278	6.95e-07	8.49e-06
FKBP9	4464.18	0.760784	0.153346	4.96123	7e-07	8.56e-06
GMPR	499.586	1.77747	0.358291	4.96097	7.01e-07	8.56e-06
KRT80	5671.47	-1.51701	0.305823	-4.96041	7.03e-07	8.58e-06
HCFC2	632.745	-0.593296	0.119633	-4.95931	7.07e-07	8.63e-06
FMO2	148.176	-2.67528	0.539663	-4.9573	7.15e-07	8.7e-06
SFRP5	22.3236	4.03627	0.8142	4.95735	7.15e-07	8.7e-06
CLIP3	434.126	1.32628	0.267592	4.95634	7.18e-07	8.74e-06
HMCN1	333.296	1.88233	0.379798	4.95614	7.19e-07	8.74e-06
PITRM1	3811.37	0.630494	0.127236	4.95533	7.22e-07	8.77e-06
ZMYND11	3235.6	0.578358	0.116715	4.95531	7.22e-07	8.77e-06
TMEM150A	572.254	0.855375	0.172642	4.95462	7.25e-07	8.8e-06
NELL2	792.69	2.31242	0.466902	4.95269	7.32e-07	8.88e-06
CASD1	750.47	0.722605	0.145975	4.95019	7.41e-07	8.99e-06
CD247	526.233	-1.48131	0.299261	-4.94991	7.42e-07	8.99e-06
RTTN	1075.01	-0.717921	0.145072	-4.94871	7.47e-07	9.04e-06
TMLHE	454.396	0.86125	0.174046	4.94839	7.48e-07	9.05e-06
FAM24B	120.883	-1.0647	0.215186	-4.94783	7.5e-07	9.07e-06
FBLN1	20946.2	1.37938	0.278798	4.94758	7.51e-07	9.08e-06
MAP9	206.144	2.1119	0.426943	4.94656	7.55e-07	9.12e-06
SLC12A2	2244.52	1.4997	0.303195	4.94631	7.56e-07	9.13e-06
TMEM79	3466.99	-1.44749	0.292652	-4.94611	7.57e-07	9.13e-06
ISG15	13102.3	-1.74518	0.352866	-4.94574	7.59e-07	9.14e-06
CD74	140989	-1.60281	0.324162	-4.94449	7.63e-07	9.18e-06
S100A1	370.483	2.01358	0.407225	4.94462	7.63e-07	9.18e-06
UGT3A2	16.2684	2.6005	0.525929	4.94459	7.63e-07	9.18e-06
PRSS35	17.4271	2.50174	0.506152	4.94267	7.71e-07	9.26e-06
DPYSL4	96.6263	2.05383	0.415559	4.94234	7.72e-07	9.27e-06
STIL	1880.21	-0.652791	0.132083	-4.94228	7.72e-07	9.27e-06
BRD7	4162.98	0.516466	0.104503	4.94213	7.73e-07	9.27e-06
SHKBP1	5562.86	-0.600914	0.121598	-4.94179	7.74e-07	9.28e-06
FANCI	5043.67	-0.590825	0.11956	-4.94166	7.75e-07	9.28e-06
NTF4	293.322	-1.81683	0.367672	-4.94143	7.76e-07	9.29e-06
QPCT	566.282	1.78886	0.362043	4.94102	7.77e-07	9.3e-06
ZNF781	19.2177	1.37131	0.277551	4.94075	7.78e-07	9.31e-06
SLC9A3R1	15361.6	-1.07879	0.21836	-4.94043	7.79e-07	9.32e-06
GPX3	4210	1.90079	0.384836	4.93922	7.84e-07	9.36e-06
WDR17	10.1118	2.4362	0.493227	4.93932	7.84e-07	9.36e-06
KIAA1549	463.444	1.91712	0.388209	4.93837	7.88e-07	9.4e-06
LY6D	36551.3	-2.52284	0.510927	-4.93776	7.9e-07	9.42e-06
KIAA0232	1862.74	0.694314	0.140628	4.93722	7.92e-07	9.44e-06
MOAP1	1273.39	0.788711	0.159828	4.93474	8.03e-07	9.55e-06
ARHGEF1	7238.64	-0.644376	0.130584	-4.93457	8.03e-07	9.56e-06
RSPO4	52.3823	3.12776	0.633888	4.93424	8.05e-07	9.57e-06
FOXP4	3725.3	0.771347	0.156344	4.93365	8.07e-07	9.59e-06
RFX3	579.784	1.17381	0.237936	4.93331	8.08e-07	9.6e-06
THRA	1730.7	0.843372	0.170962	4.93309	8.09e-07	9.61e-06
SRPK2	1953.72	0.674446	0.136725	4.93287	8.1e-07	9.61e-06
ADAMTS18	77.0698	3.30061	0.669188	4.93226	8.13e-07	9.63e-06
STX11	276.493	-1.47754	0.299578	-4.93207	8.14e-07	9.64e-06
TRRAP	3700.8	0.602746	0.122247	4.93054	8.2e-07	9.71e-06
AC092718.3	11.7052	1.04141	0.211361	4.92718	8.34e-07	9.86e-06
ZFHX2	148.934	1.46848	0.298033	4.92725	8.34e-07	9.86e-06
NAA40	1773.47	0.581702	0.118071	4.92673	8.36e-07	9.88e-06
VMP1	15316.6	-0.794115	0.161188	-4.92664	8.37e-07	9.88e-06
SHD	9.13289	2.02908	0.41193	4.92578	8.4e-07	9.92e-06
MROH8	57.1829	1.08915	0.221183	4.92422	8.47e-07	9.99e-06
SYT1	197.213	2.67426	0.543158	4.92354	8.5e-07	1e-05
CKLF	760.245	-0.869387	0.176609	-4.92267	8.54e-07	1.01e-05
RAX2	0.708426	3.32519	0.675523	4.9224	8.55e-07	1.01e-05
HLA-DQA2	1842.39	-2.14054	0.434928	-4.9216	8.58e-07	1.01e-05
DAW1	28.3911	-3.81012	0.774183	-4.92147	8.59e-07	1.01e-05
DCST2	237.37	-1.32092	0.268441	-4.92069	8.62e-07	1.01e-05
PTDSS1	5055.77	0.684615	0.139134	4.92053	8.63e-07	1.01e-05
MAGED4B	0.623637	2.54452	0.517311	4.91874	8.71e-07	1.02e-05
LAMC2	26925.6	-1.85015	0.376292	-4.91681	8.8e-07	1.03e-05
NPFFR1	65.0903	1.9676	0.400238	4.91607	8.83e-07	1.03e-05
HIST1H1C	6400.14	-1.66027	0.337759	-4.91555	8.85e-07	1.04e-05
OSBPL6	383.289	1.70901	0.347758	4.91435	8.91e-07	1.04e-05
GPATCH11	903.487	-0.561085	0.1142	-4.91317	8.96e-07	1.05e-05
STAT1	23335.5	-1.1456	0.233258	-4.9113	9.05e-07	1.06e-05
NCK1	3482.17	-0.912925	0.185902	-4.91079	9.07e-07	1.06e-05
ARHGEF4	3508.69	-1.58262	0.322418	-4.90861	9.17e-07	1.07e-05
CIPC	1337.36	0.770832	0.157031	4.90877	9.16e-07	1.07e-05
EOGT	1504.54	-0.714149	0.145489	-4.90862	9.17e-07	1.07e-05
GLUD2	34.1602	1.13373	0.23104	4.9071	9.24e-07	1.08e-05
CRYBG2	3437.71	-1.54071	0.314078	-4.9055	9.32e-07	1.09e-05
KRT16	102348	-2.62635	0.535577	-4.90378	9.4e-07	1.09e-05
CYLD	2992.38	-0.692409	0.14122	-4.90305	9.44e-07	1.1e-05
SERTAD1	2236.67	-1.0118	0.206382	-4.90254	9.46e-07	1.1e-05
LMF2	6661.18	-0.658437	0.13436	-4.90055	9.56e-07	1.11e-05
NCF2	1347.07	-1.23931	0.252898	-4.90042	9.56e-07	1.11e-05
SCX	195.044	1.5235	0.310934	4.89975	9.6e-07	1.11e-05
TIGD4	20.7318	1.77845	0.363061	4.8985	9.66e-07	1.12e-05
SERPINI1	304.578	1.47571	0.301295	4.89789	9.69e-07	1.12e-05
TSPO	11147.1	-0.872961	0.178232	-4.89789	9.69e-07	1.12e-05
MLXIPL	235.081	2.6569	0.542571	4.89686	9.74e-07	1.13e-05
AMPD1	13.0967	-2.4302	0.496385	-4.89579	9.79e-07	1.13e-05
ANGPTL6	29.5137	-0.970024	0.198163	-4.89509	9.83e-07	1.14e-05
DDX59	1252.87	-0.582546	0.119012	-4.89484	9.84e-07	1.14e-05
CRISP3	364.817	-3.84773	0.786376	-4.89299	9.93e-07	1.15e-05
KIAA1191	4477.24	0.502585	0.102744	4.8916	1e-06	1.15e-05
SLC43A1	252.133	1.4885	0.304332	4.89103	1e-06	1.16e-05
FKBP5	4301.22	-1.12023	0.229061	-4.89052	1.01e-06	1.16e-05
PRR7	244.936	1.13224	0.23155	4.88982	1.01e-06	1.16e-05
LCNL1	16.1421	1.92628	0.394059	4.88831	1.02e-06	1.17e-05
SSB	5710.44	0.603122	0.123397	4.88766	1.02e-06	1.17e-05
MT1X	8175.46	-1.62646	0.332801	-4.8872	1.02e-06	1.18e-05
ABCB1	157.918	1.48987	0.304913	4.8862	1.03e-06	1.18e-05
REEP2	195.229	1.74042	0.356192	4.88618	1.03e-06	1.18e-05
PRKCB	330.55	-1.49588	0.30618	-4.88563	1.03e-06	1.18e-05
GLTPD2	60.9024	-1.46069	0.298987	-4.88546	1.03e-06	1.18e-05
CRYL1	962.362	1.15268	0.235969	4.8849	1.03e-06	1.19e-05
KRT75	934.246	-3.00166	0.61448	-4.88488	1.03e-06	1.19e-05
CRYZ	1815.15	0.967472	0.198191	4.88151	1.05e-06	1.21e-05
LCE3A	13.1376	-4.69375	0.961597	-4.8812	1.05e-06	1.21e-05
GRINA	7035.59	0.837584	0.1716	4.88103	1.06e-06	1.21e-05
CELSR3	1956.32	-1.29812	0.265975	-4.88061	1.06e-06	1.21e-05
ATG3	3957.64	-0.585499	0.119974	-4.88021	1.06e-06	1.21e-05
CTNND1	25991.7	-0.750113	0.153777	-4.87791	1.07e-06	1.22e-05
MEIS2	851.201	-1.12078	0.229796	-4.8773	1.08e-06	1.23e-05
EDA	196.965	1.91018	0.391841	4.87489	1.09e-06	1.24e-05
FEM1B	5297.53	-0.728218	0.149381	-4.87489	1.09e-06	1.24e-05
CLCA4	3747.04	-3.08595	0.633093	-4.87441	1.09e-06	1.24e-05
MAP3K13	3977.26	-0.835394	0.171417	-4.87347	1.1e-06	1.25e-05
PRDM7	2.32995	1.78959	0.367265	4.87275	1.1e-06	1.25e-05
ATF3	5521.62	-1.64642	0.33803	-4.87064	1.11e-06	1.26e-05
FRMD6	4813.42	-1.4083	0.289234	-4.86908	1.12e-06	1.27e-05
BTN3A2	3598.85	-1.1575	0.23785	-4.8665	1.14e-06	1.29e-05
FAM25A	79.2572	-3.22332	0.662577	-4.86482	1.15e-06	1.3e-05
CSTA	17670.6	-2.36015	0.48518	-4.86448	1.15e-06	1.3e-05
IFFO2	4578.08	-1.52212	0.312923	-4.86421	1.15e-06	1.3e-05
CALY	7.78876	2.58124	0.530928	4.86176	1.16e-06	1.32e-05
WARS	24385.9	-1.586	0.326462	-4.85816	1.18e-06	1.34e-05
KIF6	19.9692	2.28546	0.470484	4.85768	1.19e-06	1.34e-05
ORAI2	1417.4	1.01139	0.208224	4.85724	1.19e-06	1.35e-05
PALD1	604.753	1.19548	0.246168	4.85633	1.2e-06	1.35e-05
PMPCB	3035.21	0.451198	0.0929109	4.85625	1.2e-06	1.35e-05
CD96	540.606	-1.5546	0.320205	-4.85503	1.2e-06	1.36e-05
FRMD1	6.85569	3.58253	0.738246	4.85276	1.22e-06	1.37e-05
IL7R	1020.3	-1.56272	0.322067	-4.85216	1.22e-06	1.38e-05
MFN2	10256.7	-0.68037	0.140281	-4.85006	1.23e-06	1.39e-05
SMPX	4.81349	2.9461	0.607423	4.85016	1.23e-06	1.39e-05
AC131097.2	24.9918	-2.25343	0.46472	-4.84901	1.24e-06	1.4e-05
BNC1	3282.86	-2.58223	0.532606	-4.8483	1.25e-06	1.4e-05
PSMC3IP	642.732	-0.622059	0.128325	-4.84752	1.25e-06	1.4e-05
TRADD	1831.88	-0.754084	0.155566	-4.84737	1.25e-06	1.4e-05
PRPS1	2667.09	-0.620804	0.128089	-4.84667	1.26e-06	1.41e-05
NFKBIA	10546.1	-0.871403	0.179887	-4.84417	1.27e-06	1.43e-05
ECEL1	190.822	2.71163	0.559921	4.84287	1.28e-06	1.43e-05
LAIR2	29.0253	-1.99586	0.412117	-4.84294	1.28e-06	1.43e-05
PLCG1	4342.84	0.719718	0.148612	4.84294	1.28e-06	1.43e-05
TUSC1	1158.87	-1.01952	0.21063	-4.84037	1.3e-06	1.45e-05
SBNO2	8463.23	-0.787607	0.16274	-4.83965	1.3e-06	1.45e-05
SPTY2D1-AS1	31.644	0.858243	0.177417	4.83745	1.32e-06	1.47e-05
TNFRSF17	77.9941	-2.26074	0.46735	-4.83736	1.32e-06	1.47e-05
LITAF	12822.6	-0.844181	0.174529	-4.8369	1.32e-06	1.47e-05
ZNF85	106.181	1.72945	0.357581	4.83654	1.32e-06	1.47e-05
FANCE	1656.56	-0.809234	0.167372	-4.83494	1.33e-06	1.48e-05
FBXO6	1367.49	-1.03257	0.213561	-4.83499	1.33e-06	1.48e-05
TMEM40	1780.7	-1.92209	0.397547	-4.83489	1.33e-06	1.48e-05
IFI27L2	2203.66	-1.2704	0.262822	-4.83372	1.34e-06	1.49e-05
LAX1	104.742	-1.77358	0.366946	-4.83334	1.34e-06	1.49e-05
LSAMP	123.543	1.79608	0.371614	4.83319	1.34e-06	1.49e-05
HHIP	73.1369	2.90001	0.600101	4.83253	1.35e-06	1.5e-05
PDE11A	32.0093	2.36847	0.490153	4.8321	1.35e-06	1.5e-05
PLCH2	3118.35	-1.68689	0.349247	-4.83008	1.36e-06	1.51e-05
ODF3L1	50.5307	-1.74773	0.361926	-4.82897	1.37e-06	1.52e-05
IGSF23	9.35537	2.60264	0.539002	4.82863	1.37e-06	1.52e-05
DPY19L3	1194.03	0.767445	0.159009	4.82643	1.39e-06	1.54e-05
MFAP2	2196.24	1.46144	0.302817	4.82616	1.39e-06	1.54e-05
ENDOU	101.495	-2.63516	0.54616	-4.82489	1.4e-06	1.55e-05
ZFP36	14500.1	-1.37958	0.285947	-4.82461	1.4e-06	1.55e-05
MYOZ1	23.1479	1.77932	0.36884	4.8241	1.41e-06	1.55e-05
SLC22A16	14.2449	2.36884	0.491109	4.82345	1.41e-06	1.56e-05
EBF3	118.493	-2.19187	0.454574	-4.82181	1.42e-06	1.57e-05
TMEM184B	5088.23	0.640244	0.132794	4.82134	1.43e-06	1.57e-05
GCSH	246.493	0.772141	0.160257	4.81815	1.45e-06	1.6e-05
RUBCNL	193.896	1.40766	0.292176	4.81784	1.45e-06	1.6e-05
LRRC3B	6.89529	5.00544	1.039	4.81755	1.45e-06	1.6e-05
SAXO1	2.51544	1.47001	0.305139	4.81751	1.45e-06	1.6e-05
ATG4A	984.18	-0.618066	0.128304	-4.81719	1.46e-06	1.6e-05
S100P	8877.41	-2.43353	0.505221	-4.81676	1.46e-06	1.6e-05
EGFR	11903.2	-1.55079	0.321993	-4.81624	1.46e-06	1.61e-05
TMEM8A	3929.56	0.848913	0.176301	4.81515	1.47e-06	1.61e-05
DCAF13	3022.44	0.59199	0.122998	4.81299	1.49e-06	1.63e-05
APOF	2.34089	1.93771	0.402783	4.8108	1.5e-06	1.65e-05
SDR16C5	1928.83	-1.76437	0.366744	-4.8109	1.5e-06	1.65e-05
CYP4F8	34.537	-3.2755	0.680886	-4.81064	1.5e-06	1.65e-05
FABP3	247.985	1.38638	0.288256	4.80953	1.51e-06	1.66e-05
KAT2A	4479.82	0.74425	0.15477	4.80875	1.52e-06	1.66e-05
KCNK7	151.206	-1.86825	0.388569	-4.80803	1.52e-06	1.67e-05
SGTB	324.75	0.719916	0.149743	4.80768	1.53e-06	1.67e-05
ETS2	19639.8	-1.20113	0.249956	-4.80536	1.54e-06	1.69e-05
PARP6	3197.59	-0.598448	0.12454	-4.80528	1.55e-06	1.69e-05
ELK4	3988.65	-0.61977	0.128985	-4.80498	1.55e-06	1.69e-05
EIF3E	13382.5	0.71144	0.148115	4.80331	1.56e-06	1.7e-05
MKRN1	6333.02	0.457974	0.0953557	4.80279	1.56e-06	1.7e-05
LTBP3	4307.56	1.01186	0.210787	4.80038	1.58e-06	1.72e-05
CLIC2	802.157	-1.69449	0.353027	-4.7999	1.59e-06	1.73e-05
ALPK2	119.663	2.13696	0.445234	4.79963	1.59e-06	1.73e-05
RDH16	359.626	-2.07698	0.432812	-4.79881	1.6e-06	1.73e-05
ZNF704	1663.94	1.5258	0.318	4.79812	1.6e-06	1.74e-05
CHIC2	1006.2	-0.63685	0.132745	-4.79754	1.61e-06	1.74e-05
HLA-B	159303	-1.30547	0.272146	-4.79693	1.61e-06	1.75e-05
SNCA	312.613	-1.98124	0.413243	-4.79436	1.63e-06	1.77e-05
CDH19	9.56074	-3.23546	0.67489	-4.79405	1.63e-06	1.77e-05
FAM204A	1684.83	0.476928	0.0994837	4.79403	1.63e-06	1.77e-05
KLHL23	820.988	1.08143	0.225632	4.79287	1.64e-06	1.78e-05
TMEM177	592.539	0.654183	0.136488	4.79296	1.64e-06	1.78e-05
ALS2CL	5875.92	-1.30301	0.271892	-4.79236	1.65e-06	1.78e-05
EBP	6641.42	-0.850722	0.177584	-4.79055	1.66e-06	1.8e-05
RHOQ	1489.45	0.759168	0.158473	4.79052	1.66e-06	1.8e-05
PAX8	2299.84	2.62012	0.546991	4.79006	1.67e-06	1.8e-05
PPID	1655.43	0.553401	0.115543	4.78956	1.67e-06	1.8e-05
HEY2	219.661	1.57775	0.329514	4.78811	1.68e-06	1.82e-05
PGLYRP4	302.896	-2.35312	0.491643	-4.78624	1.7e-06	1.83e-05
CDH2	503.6	2.47355	0.517225	4.78236	1.73e-06	1.87e-05
MKRN2OS	188.237	-1.24628	0.260629	-4.7818	1.74e-06	1.87e-05
NCR1	25.3859	-1.85729	0.388604	-4.7794	1.76e-06	1.89e-05
ZNF521	163.417	1.54714	0.323713	4.77934	1.76e-06	1.89e-05
NIPAL2	2526.98	-1.11551	0.233464	-4.7781	1.77e-06	1.9e-05
EPB41L2	2128.61	1.2593	0.263591	4.77747	1.78e-06	1.91e-05
KLF5	22716.6	-1.01053	0.211613	-4.77537	1.79e-06	1.93e-05
MYO1E	5202.44	-0.808781	0.169442	-4.77321	1.81e-06	1.94e-05
IFI27	36659.4	-1.40319	0.294008	-4.77264	1.82e-06	1.95e-05
CRIP3	25.2382	1.88804	0.395884	4.76919	1.85e-06	1.98e-05
SIK1	395.546	-2.66988	0.559829	-4.76911	1.85e-06	1.98e-05
FN3KRP	3730.06	-0.570177	0.119616	-4.76671	1.87e-06	2e-05
CRYBG1	6598.04	-0.991355	0.207997	-4.76619	1.88e-06	2.01e-05
CNR2	15.7599	-1.88832	0.396269	-4.76525	1.89e-06	2.02e-05
CXCL16	5837.58	-0.952447	0.199887	-4.76493	1.89e-06	2.02e-05
FUT9	7.27384	3.71362	0.779376	4.76486	1.89e-06	2.02e-05
ID4	795.451	1.72311	0.361704	4.76386	1.9e-06	2.03e-05
AGTRAP	4946.28	-0.878431	0.184412	-4.76342	1.9e-06	2.03e-05
UGT1A7	89.2208	-4.1431	0.869782	-4.76338	1.9e-06	2.03e-05
STAU2	1960.13	0.590966	0.124074	4.76301	1.91e-06	2.03e-05
KLRB1	177.862	-1.4619	0.306938	-4.76286	1.91e-06	2.03e-05
GBP4	4940.97	-1.66379	0.349373	-4.76222	1.91e-06	2.04e-05
NARS2	920.305	0.634584	0.133257	4.76212	1.92e-06	2.04e-05
C8orf44	186.818	0.712347	0.149654	4.75997	1.94e-06	2.06e-05
CD207	348.957	-2.25153	0.473183	-4.75827	1.95e-06	2.07e-05
LIMA1	8258.6	-1.04919	0.220714	-4.75364	2e-06	2.12e-05
MYF6	0.586285	3.08228	0.648427	4.75347	2e-06	2.12e-05
ST6GALNAC2	3758.27	-1.10945	0.233405	-4.75335	2e-06	2.12e-05
ANKRD9	2656.02	-0.948296	0.199553	-4.7521	2.01e-06	2.13e-05
PCDHB6	26.8206	2.25944	0.475498	4.75174	2.02e-06	2.14e-05
CD38	608.468	-1.69689	0.357122	-4.75156	2.02e-06	2.14e-05
SH2D3A	2300.83	-0.928169	0.19535	-4.7513	2.02e-06	2.14e-05
UBAC1	4281.25	-0.598958	0.126061	-4.75135	2.02e-06	2.14e-05
CSH2	5.67637	-3.16277	0.665922	-4.74946	2.04e-06	2.16e-05
TMIGD2	69.3998	-1.87465	0.394733	-4.74917	2.04e-06	2.16e-05
JAG1	10929.8	-1.20634	0.254057	-4.74829	2.05e-06	2.17e-05
TOP2B	7324.07	0.610576	0.128613	4.7474	2.06e-06	2.17e-05
ADAM15	14141.6	-0.892996	0.188115	-4.74709	2.06e-06	2.18e-05
THSD1	559.304	-1.67571	0.353011	-4.74691	2.07e-06	2.18e-05
NCAPH2	5205.74	-0.724782	0.152759	-4.74462	2.09e-06	2.2e-05
DDB1	12079	0.380777	0.0802667	4.7439	2.1e-06	2.21e-05
SYT7	1589.8	1.53532	0.323647	4.74381	2.1e-06	2.21e-05
OR2C1	1.53758	1.93795	0.408833	4.7402	2.14e-06	2.25e-05
THUMPD3	1736.5	0.514034	0.108455	4.73961	2.14e-06	2.25e-05
SPECC1L	1772.88	0.48329	0.102009	4.73771	2.16e-06	2.27e-05
PAX6	461.881	-1.47403	0.311225	-4.73622	2.18e-06	2.29e-05
CHD9	2484.5	-0.680944	0.143791	-4.73566	2.18e-06	2.29e-05
AMPD3	1248.82	-0.983016	0.207604	-4.73505	2.19e-06	2.3e-05
CSRNP3	125.308	1.96784	0.415583	4.73513	2.19e-06	2.3e-05
CDHR5	128.093	-3.19945	0.675731	-4.73479	2.19e-06	2.3e-05
TMEM9	5952.02	0.829089	0.175106	4.73478	2.19e-06	2.3e-05
ENOX2	1115.66	-0.638506	0.134909	-4.73287	2.21e-06	2.32e-05
LIG3	1432.93	0.538465	0.113791	4.73206	2.22e-06	2.32e-05
TGM5	289.025	-2.30259	0.486686	-4.73115	2.23e-06	2.33e-05
GRPR	6.81937	2.50217	0.528985	4.73013	2.24e-06	2.34e-05
STEAP4	4552.43	-2.27058	0.480113	-4.72926	2.25e-06	2.35e-05
DDC	70.8279	3.34001	0.70629	4.72896	2.26e-06	2.35e-05
MRLN	131.258	-3.34617	0.708032	-4.72601	2.29e-06	2.39e-05
METTL2B	1297.43	0.544844	0.115313	4.72492	2.3e-06	2.4e-05
VPS29	4565.66	-0.41454	0.0877524	-4.72397	2.31e-06	2.41e-05
MAGEL2	19.4651	2.0549	0.435109	4.72273	2.33e-06	2.42e-05
SPTSSA	4693.92	-0.747357	0.158249	-4.72267	2.33e-06	2.42e-05
IRAK1BP1	194.278	1.17039	0.247877	4.72167	2.34e-06	2.43e-05
CBR1	6252.18	-1.13918	0.241278	-4.72142	2.34e-06	2.43e-05
SLC47A2	174.174	-2.06002	0.436335	-4.7212	2.34e-06	2.44e-05
CD79A	460.011	-2.00693	0.425122	-4.72083	2.35e-06	2.44e-05
SLC37A3	1800.09	0.554215	0.117406	4.7205	2.35e-06	2.44e-05
HIC2	417.424	0.909214	0.192631	4.71997	2.36e-06	2.45e-05
DGKI	32.9254	1.33848	0.283646	4.71883	2.37e-06	2.46e-05
TNFSF10	26679.5	-1.52706	0.32362	-4.71869	2.37e-06	2.46e-05
PDE5A	735.724	1.2387	0.262517	4.71857	2.38e-06	2.46e-05
GEMIN5	1341.26	0.526246	0.111536	4.71817	2.38e-06	2.46e-05
ZNF174	496.902	0.461761	0.0979033	4.7165	2.4e-06	2.48e-05
ISY1	2388.91	-0.73361	0.155584	-4.71522	2.41e-06	2.5e-05
RNF170	1018.6	0.537251	0.113985	4.71334	2.44e-06	2.52e-05
CERS3	1852.76	-2.84487	0.60368	-4.71254	2.45e-06	2.53e-05
TMPRSS15	2.57263	3.1519	0.668902	4.71205	2.45e-06	2.53e-05
LCE1E	5.97074	-3.47503	0.737579	-4.7114	2.46e-06	2.54e-05
ASIC2	24.5889	3.05174	0.647859	4.71049	2.47e-06	2.55e-05
ZNF853	281.702	1.59609	0.338842	4.71042	2.47e-06	2.55e-05
ITGB4	33885.5	-1.15718	0.24585	-4.70687	2.52e-06	2.59e-05
ELP3	1715.05	0.683155	0.145164	4.70609	2.53e-06	2.6e-05
HNRNPLL	1754	0.482491	0.102522	4.70623	2.52e-06	2.6e-05
RSAD2	2200.83	-1.73404	0.368464	-4.70612	2.52e-06	2.6e-05
SOX5	81.8412	1.94329	0.412992	4.7054	2.53e-06	2.6e-05
NLK	1056.36	0.500351	0.106353	4.70462	2.54e-06	2.61e-05
PCP4	149.654	3.40065	0.722839	4.70457	2.54e-06	2.61e-05
CDKL2	37.4115	1.95105	0.414877	4.70272	2.57e-06	2.63e-05
FKBP10	4703.14	1.65638	0.352212	4.70279	2.57e-06	2.63e-05
ZNF385C	158.227	1.28509	0.273273	4.7026	2.57e-06	2.63e-05
MFSD3	1008.68	0.954319	0.202988	4.70135	2.58e-06	2.65e-05
STRBP	2167.72	0.626455	0.133263	4.70091	2.59e-06	2.65e-05
KLK6	1125.41	-2.79571	0.594852	-4.69984	2.6e-06	2.66e-05
KRT77	18.909	-3.3719	0.717471	-4.6997	2.61e-06	2.66e-05
CSF2RA	455.504	-1.45291	0.309171	-4.69938	2.61e-06	2.67e-05
GBP3	2659.81	-1.13266	0.241079	-4.69828	2.62e-06	2.68e-05
WDR66	2094.55	-1.61911	0.344725	-4.69681	2.64e-06	2.7e-05
S100B	386.999	-1.83622	0.390969	-4.6966	2.65e-06	2.7e-05
BARD1	1351.25	-0.743085	0.158239	-4.69597	2.65e-06	2.71e-05
SERINC5	3974.78	0.837888	0.178467	4.69493	2.67e-06	2.72e-05
SLC9A1	4657.51	-0.713956	0.152066	-4.69503	2.67e-06	2.72e-05
MBIP	1000.27	0.77075	0.164196	4.69408	2.68e-06	2.72e-05
PAK6	85.191	-1.20008	0.255659	-4.69408	2.68e-06	2.72e-05
FBXO32	2798.74	-1.11498	0.237604	-4.69259	2.7e-06	2.74e-05
IRX2	861.234	-2.80733	0.598553	-4.69019	2.73e-06	2.77e-05
COMMD2	2890.46	-0.590138	0.125865	-4.68865	2.75e-06	2.79e-05
EPHA2	11054.7	-1.24376	0.265277	-4.68852	2.75e-06	2.79e-05
DTNA	113.37	1.88113	0.401265	4.68801	2.76e-06	2.8e-05
KRT6A	204806	-2.37364	0.506357	-4.68768	2.76e-06	2.8e-05
PGR	441.766	2.46394	0.525655	4.68737	2.77e-06	2.8e-05
RIN2	4957.18	-0.798091	0.170266	-4.68732	2.77e-06	2.8e-05
LBX1	22.8103	-4.4212	0.943316	-4.68687	2.77e-06	2.81e-05
TMEM68	1208.07	0.471845	0.100674	4.68686	2.77e-06	2.81e-05
SLC28A3	869.26	-1.60128	0.34167	-4.68662	2.78e-06	2.81e-05
ALDH1A3	2060.9	-1.8144	0.387187	-4.68609	2.78e-06	2.81e-05
WNT9A	925.878	-1.26271	0.269454	-4.6862	2.78e-06	2.81e-05
CCDC112	413.756	0.860542	0.183643	4.68594	2.79e-06	2.81e-05
DCBLD1	1717.32	-0.933576	0.199263	-4.68514	2.8e-06	2.82e-05
INPPL1	4879.74	0.67903	0.144992	4.68321	2.82e-06	2.85e-05
NKX1-2	92.9318	-2.6253	0.560652	-4.68259	2.83e-06	2.86e-05
DUOXA2	979.219	-2.60922	0.557388	-4.68116	2.85e-06	2.87e-05
PON1	18.0503	3.23457	0.691932	4.6747	2.94e-06	2.96e-05
XRN1	3440.93	-0.722575	0.15457	-4.67474	2.94e-06	2.96e-05
POLD3	2297.82	-0.498027	0.106547	-4.67423	2.95e-06	2.97e-05
LRP5L	251.556	0.873236	0.186861	4.67318	2.97e-06	2.98e-05
BDKRB1	325.231	-1.68694	0.361137	-4.67119	2.99e-06	3.01e-05
REEP4	5156.99	-0.816722	0.174851	-4.67095	3e-06	3.01e-05
MAPK8IP1	598.27	1.52695	0.326915	4.67079	3e-06	3.01e-05
FABP5	31736.9	-2.17968	0.466685	-4.67057	3e-06	3.01e-05
DERA	2769.29	-0.612327	0.131146	-4.66903	3.03e-06	3.03e-05
STX16-NPEPL1	41.16	1.17701	0.25216	4.6677	3.05e-06	3.05e-05
CYP2C9	60.6706	-3.10513	0.665501	-4.66585	3.07e-06	3.08e-05
CSF3	453.775	-2.79833	0.599795	-4.66549	3.08e-06	3.08e-05
GRB14	181.047	2.03989	0.437282	4.66494	3.09e-06	3.09e-05
MKRN2	1488.29	0.549436	0.117801	4.66409	3.1e-06	3.1e-05
ATAT1	809.144	0.768174	0.164715	4.66365	3.11e-06	3.1e-05
RAPGEFL1	7937.57	-1.3837	0.29672	-4.6633	3.11e-06	3.11e-05
NDUFAF6	856.452	0.5792	0.124233	4.66222	3.13e-06	3.12e-05
FXYD3	32462.4	-1.23915	0.265821	-4.66158	3.14e-06	3.13e-05
SNURF	9.43307	1.52498	0.327153	4.66136	3.14e-06	3.13e-05
MOB1B	1262.11	0.59298	0.127251	4.65993	3.16e-06	3.15e-05
PEX2	2182.64	0.490699	0.105321	4.65908	3.18e-06	3.16e-05
PLAUR	4907.04	-1.14025	0.244747	-4.65891	3.18e-06	3.17e-05
CORO6	498.881	-1.90727	0.409468	-4.65791	3.19e-06	3.18e-05
LDLR	7464.44	-1.09375	0.234832	-4.65758	3.2e-06	3.18e-05
POLD1	4595.68	-0.640682	0.137602	-4.65604	3.22e-06	3.2e-05
IGFN1	44.0362	2.44415	0.525001	4.65552	3.23e-06	3.21e-05
TINF2	3458.27	-0.543709	0.116814	-4.65449	3.25e-06	3.22e-05
TRIP10	5664.66	-0.731827	0.157227	-4.6546	3.25e-06	3.22e-05
BCL6	3872.49	-0.838379	0.180149	-4.6538	3.26e-06	3.23e-05
GPAM	722.701	0.652328	0.140182	4.65344	3.26e-06	3.24e-05
TNRC18	6426.98	0.64043	0.13766	4.65225	3.28e-06	3.25e-05
SEMA4G	393.352	1.7753	0.381802	4.6498	3.32e-06	3.29e-05
KRT40	13.4506	2.72014	0.585064	4.6493	3.33e-06	3.3e-05
KCNJ4	13.8226	3.21522	0.691642	4.64868	3.34e-06	3.31e-05
DDHD2	1620.27	0.640649	0.137851	4.6474	3.36e-06	3.32e-05
NFYA	1854.16	0.527964	0.113603	4.64743	3.36e-06	3.32e-05
ZNF773	121.21	1.62646	0.350024	4.64671	3.37e-06	3.33e-05
PIAS1	2060.28	-0.499372	0.107479	-4.64623	3.38e-06	3.34e-05
ZNF467	335.576	1.4265	0.307174	4.64397	3.42e-06	3.37e-05
SPRY1	1082.02	1.36142	0.293177	4.64368	3.42e-06	3.38e-05
IMPAD1	5017.55	0.502154	0.108157	4.64281	3.44e-06	3.39e-05
PQLC2L	23.4384	2.97918	0.641705	4.6426	3.44e-06	3.39e-05
POLR3E	2192.71	0.455713	0.0981789	4.64165	3.46e-06	3.4e-05
USP44	61.3752	2.1995	0.473861	4.64167	3.46e-06	3.4e-05
ST3GAL2	980.607	0.713933	0.153827	4.64113	3.47e-06	3.41e-05
WISP2	255.474	-2.14597	0.46256	-4.63933	3.5e-06	3.44e-05
ANO7	115.157	1.29719	0.279761	4.63678	3.54e-06	3.48e-05
KDM4B	2459.31	0.590595	0.127378	4.63654	3.54e-06	3.48e-05
TDP2	2605.4	0.688188	0.148435	4.63629	3.55e-06	3.48e-05
FCRL5	206.189	-2.04657	0.441505	-4.63544	3.56e-06	3.49e-05
ZNF365	225.94	-2.01883	0.435569	-4.63492	3.57e-06	3.5e-05
MCL1	27388.5	-0.70506	0.152127	-4.63468	3.57e-06	3.5e-05
CHD7	1733.02	0.902379	0.194714	4.63437	3.58e-06	3.51e-05
HOXB1	28.357	-2.54112	0.548468	-4.63312	3.6e-06	3.53e-05
AC020922.1	18.3925	-2.22729	0.480873	-4.63175	3.63e-06	3.55e-05
TNMD	2.02782	3.09832	0.668915	4.63185	3.62e-06	3.55e-05
CNTLN	871.717	-0.803593	0.173537	-4.63067	3.64e-06	3.56e-05
RRM2	9084.5	-0.713939	0.154179	-4.63057	3.65e-06	3.56e-05
IL9R	30.1825	-1.52927	0.330291	-4.63005	3.66e-06	3.57e-05
SRSF12	82.1355	1.67344	0.361437	4.62997	3.66e-06	3.57e-05
DHX58	1347.04	-1.00686	0.21751	-4.62904	3.67e-06	3.58e-05
CASP4	3388.23	-0.935706	0.202157	-4.62861	3.68e-06	3.59e-05
GPR155	512.191	1.3874	0.299758	4.6284	3.69e-06	3.59e-05
ZNF445	1127.98	0.616224	0.133142	4.62834	3.69e-06	3.59e-05
AQP11	62.7677	0.888987	0.192117	4.62732	3.7e-06	3.61e-05
FSCN2	37.8185	1.39385	0.301293	4.62624	3.72e-06	3.62e-05
IP6K3	134.901	-2.86049	0.618378	-4.62579	3.73e-06	3.63e-05
CD3D	635.775	-1.65688	0.358204	-4.62553	3.74e-06	3.63e-05
TSPEAR	18.0012	2.84855	0.615976	4.62445	3.76e-06	3.65e-05
PYCARD	2117.84	-1.16223	0.251381	-4.62339	3.78e-06	3.66e-05
SLC25A33	645.478	0.822592	0.177918	4.62344	3.77e-06	3.66e-05
ST13	10291.5	0.482822	0.104442	4.62286	3.78e-06	3.67e-05
OSGIN2	1190.95	0.589369	0.127562	4.62024	3.83e-06	3.72e-05
KIF5A	52.7584	1.77436	0.384102	4.61952	3.85e-06	3.73e-05
EFEMP2	1286.65	1.29534	0.280531	4.61746	3.88e-06	3.76e-05
PCBD1	2683.23	0.712144	0.154255	4.61666	3.9e-06	3.77e-05
ADRA2C	432.208	1.91092	0.41403	4.61541	3.92e-06	3.79e-05
ANKLE2	7890.48	-0.540774	0.117166	-4.61546	3.92e-06	3.79e-05
CEBPE	16.6271	-2.31481	0.501581	-4.61503	3.93e-06	3.8e-05
GBP6	3392.85	-2.65718	0.575822	-4.61459	3.94e-06	3.8e-05
FAM136A	3127.04	0.580601	0.125863	4.61298	3.97e-06	3.83e-05
ENSA	15304.3	-0.577022	0.125094	-4.61269	3.97e-06	3.84e-05
CAMK2N2	166.234	-1.68789	0.366108	-4.61037	4.02e-06	3.88e-05
VWCE	71.1454	1.77953	0.38604	4.6097	4.03e-06	3.89e-05
CTH	170.668	1.4591	0.316651	4.60793	4.07e-06	3.92e-05
PLAC8	1675.05	-2.10475	0.456774	-4.60787	4.07e-06	3.92e-05
XPNPEP3	1005.53	0.544668	0.1182	4.60801	4.07e-06	3.92e-05
IL36G	842.925	-2.8599	0.620687	-4.60764	4.07e-06	3.92e-05
LAMA1	453.699	2.51535	0.546041	4.60652	4.09e-06	3.94e-05
ICAM1	3884.4	-1.32398	0.287564	-4.60412	4.14e-06	3.98e-05
POR	6459.08	0.768956	0.167014	4.60413	4.14e-06	3.98e-05
TTPA	22.8857	2.9023	0.630353	4.60424	4.14e-06	3.98e-05
PSD	241.068	1.14755	0.249276	4.60354	4.15e-06	3.99e-05
FAM25C	3.36433	-3.73854	0.812275	-4.60256	4.17e-06	4e-05
KDSR	3952.65	-0.596598	0.129644	-4.60182	4.19e-06	4.01e-05
AGT	216.532	2.51771	0.547177	4.60127	4.2e-06	4.02e-05
CFAP161	8.76022	1.34838	0.293072	4.60085	4.21e-06	4.03e-05
SLC6A15	197.864	-3.55492	0.772711	-4.60058	4.21e-06	4.03e-05
SEMA3G	223.095	1.2409	0.269736	4.60041	4.22e-06	4.03e-05
BLNK	1086.36	-1.17099	0.254552	-4.60019	4.22e-06	4.04e-05
MMP10	1943.71	-2.69687	0.586281	-4.59997	4.23e-06	4.04e-05
SLC35E2B	1915.91	0.801047	0.174142	4.59996	4.23e-06	4.04e-05
POP1	662.066	0.581668	0.126478	4.59896	4.25e-06	4.05e-05
MAST4	4200.2	-1.17179	0.254817	-4.59857	4.25e-06	4.06e-05
LAD1	21391.2	-1.00651	0.218888	-4.59831	4.26e-06	4.06e-05
CHAF1A	3790.5	-0.597007	0.129847	-4.59777	4.27e-06	4.07e-05
AK8	111.574	1.528	0.33247	4.5959	4.31e-06	4.1e-05
LRBA	3250.81	0.662237	0.144164	4.59365	4.36e-06	4.15e-05
PIGA	1262.67	-0.646431	0.140736	-4.59321	4.36e-06	4.15e-05
SLC16A8	230.532	-1.35999	0.296211	-4.59128	4.41e-06	4.19e-05
EPHX3	3325.16	-1.92727	0.419777	-4.59117	4.41e-06	4.19e-05
MRGPRX3	35.7699	-3.28495	0.715551	-4.59081	4.42e-06	4.2e-05
THSD7A	80.7268	1.6836	0.366808	4.58985	4.44e-06	4.21e-05
TNNI1	188.719	1.13697	0.247723	4.58968	4.44e-06	4.21e-05
KCNH4	29.9321	-1.72812	0.376626	-4.58843	4.47e-06	4.24e-05
CPNE4	21.4921	2.9255	0.637787	4.58695	4.5e-06	4.27e-05
PLA2G4C	356.933	-1.36487	0.297583	-4.58653	4.51e-06	4.27e-05
TTC7A	3898.31	-0.597212	0.13021	-4.58651	4.51e-06	4.27e-05
PRLR	490.797	2.31034	0.503756	4.58623	4.51e-06	4.27e-05
GPT2	2904.74	0.992845	0.216521	4.58544	4.53e-06	4.29e-05
ANXA10	27.9405	-3.04147	0.663379	-4.58481	4.54e-06	4.3e-05
PLEKHB1	567.116	2.01588	0.439873	4.58287	4.59e-06	4.34e-05
MXD1	4804.12	-1.31612	0.287237	-4.58202	4.61e-06	4.35e-05
TMEM192	949.975	0.623772	0.13614	4.58185	4.61e-06	4.35e-05
OGDHL	271.714	2.65365	0.579225	4.58139	4.62e-06	4.36e-05
BRSK2	78.5132	2.00938	0.438636	4.58097	4.63e-06	4.37e-05
FAM182B	86.805	-1.87752	0.40988	-4.58066	4.64e-06	4.37e-05
SLC5A4	5.39662	1.49134	0.325796	4.57753	4.71e-06	4.43e-05
ADAMTSL4	1569.95	-1.94634	0.425251	-4.57691	4.72e-06	4.45e-05
ATP6V0E2	1453.58	1.17049	0.255853	4.57486	4.77e-06	4.49e-05
ANK1	427.911	-1.88282	0.411624	-4.57414	4.78e-06	4.5e-05
CGB7	61.945	-1.67672	0.36655	-4.57433	4.78e-06	4.5e-05
S100G	0.448601	3.88714	0.849805	4.57415	4.78e-06	4.5e-05
CCDC15	265.282	-0.770468	0.168501	-4.57249	4.82e-06	4.53e-05
FAM227A	175.038	1.56196	0.341663	4.57164	4.84e-06	4.55e-05
LRRC43	36.8197	1.8636	0.407685	4.57118	4.85e-06	4.55e-05
C1orf74	1211.47	-1.27876	0.27976	-4.57091	4.86e-06	4.56e-05
SYNPR	0.956819	2.77991	0.608223	4.57055	4.86e-06	4.56e-05
[truncated: 5,198 more rows]

## Sheet: Sheet2
Data2. GSVA analysis of FARGs in CC
id	TCGA-2W-A8YY-01	TCGA-C5-A8YQ-01	TCGA-EA-A410-01	TCGA-EA-A4BA-01	TCGA-EA-A556-01	TCGA-EK-A2PM-01	TCGA-FU-A3HZ-01	TCGA-FU-A57G-01	TCGA-HM-A6W2-01	TCGA-HM-A6W2-06	TCGA-IR-A3LA-01	TCGA-JW-A5VH-01	TCGA-VS-A8EJ-01	TCGA-VS-A8QH-01	TCGA-VS-A9UJ-01	TCGA-VS-A9UT-01	TCGA-VS-A9V0-01	TCGA-VS-A9V4-01	TCGA-ZJ-AAX8-01	TCGA-4J-AA1J-01	TCGA-BI-A0VR-01	TCGA-BI-A0VS-01	TCGA-BI-A20A-01	TCGA-C5-A0TN-01	TCGA-C5-A1BE-01	TCGA-C5-A1BF-01	TCGA-C5-A1BI-01	TCGA-C5-A1BJ-01	TCGA-C5-A1BK-01	TCGA-C5-A1BL-01	TCGA-C5-A1BM-01	TCGA-C5-A1BN-01	TCGA-C5-A1BQ-01	TCGA-C5-A1M5-01	TCGA-C5-A1M6-01	TCGA-C5-A1M7-01	TCGA-C5-A1M8-01	TCGA-C5-A1M9-01	TCGA-C5-A1ME-01	TCGA-C5-A1MF-01	TCGA-C5-A1MH-01	TCGA-C5-A1MI-01	TCGA-C5-A1MJ-01	TCGA-C5-A1MK-01	TCGA-C5-A1ML-01	TCGA-C5-A1MN-01	TCGA-C5-A1MP-01	TCGA-C5-A1MQ-01	TCGA-C5-A2LS-01
GOCC_NUCLEOLUS	0.429635	0.218979	0.354496	0.561102	0.468016	0.36453	0.490769	0.299609	0.536937	0.52694	0.483771	0.724585	0.1944	0.326482	0.389423	0.465155	0.297062	0.507692	-0.295894	0.00120192	-0.032967	-0.0806463	-0.382013	0.0946881	-0.288419	0.220218	-0.413214	0.00930559	-0.144349	-0.109903	-0.373718	0.175	-0.298382	-0.206731	-0.351399	-0.0865226	-0.393111	0.276768	0.0347734	-0.0120426	-0.439191	0.292192	0.296909	-0.150287	-0.173105	-0.351502	-0.280828	0.181571	-0.223556
HP_HYPERTONIA	0.232776	0.493793	0.106061	0.136364	0.49054	0.460173	0.560606	0.774114	0.0921773	0.152972	0.347755	0.103624	0.30333	0.427749	0.157097	0.637604	0.439328	0.446879	0.59484	0.180223	-0.377273	0.313608	-0.741013	0.0445205	-0.41072	0.343823	-0.285558	-0.0163215	-0.356211	-0.350359	0.030303	-0.20405	0.334857	-0.398154	-0.516503	0.267184	-0.580869	-0.0888019	-0.0297701	-0.0949051	-0.0330057	0.227273	0.438617	-0.238419	0.0189573	0.16469	-0.117424	0.299962	-0.419192
HP_UPPER_MOTOR_NEURON_DYSFUNCTION	0.232776	0.493793	0.106061	0.136364	0.49054	0.460173	0.560606	0.774114	0.0921773	0.152972	0.347755	0.103624	0.30333	0.427749	0.157097	0.637604	0.439328	0.446879	0.59484	0.180223	-0.377273	0.313608	-0.741013	0.0445205	-0.41072	0.343823	-0.285558	-0.0163215	-0.356211	-0.350359	0.030303	-0.20405	0.334857	-0.398154	-0.516503	0.267184	-0.580869	-0.0888019	-0.0297701	-0.0949051	-0.0330057	0.227273	0.438617	-0.238419	0.0189573	0.16469	-0.117424	0.299962	-0.419192
HP_ABNORMALITY_OF_THE_SYNOVIA	-0.0905925	-0.320624	0.232591	-0.323022	-0.471462	0.0294737	-0.013667	-0.445827	-0.542222	-0.119908	-0.301162	-0.254386	-0.107081	-0.11597	-0.322942	-0.348607	-0.529673	-0.426693	-0.158426	0.0644027	-0.114491	-0.0778066	-0.0113579	-0.128308	0.0901211	-0.358357	0.00947058	-0.0623434	-0.078546	0.263945	-0.245661	0.129342	0.10381	0.123971	0.378528	0.222603	0.369146	-0.0352044	-0.0767064	0.12989	0.106858	0.302839	-0.00457842	0.167815	-0.498394	0.0630495	0.0296516	-0.177672	0.506823
HP_JOINT_DISLOCATION	-0.081235	-0.296303	0.232433	-0.311654	-0.451365	0.0624644	-0.0108177	-0.433742	-0.535493	-0.139617	-0.275606	-0.239064	-0.10086	-0.116597	-0.312455	-0.376697	-0.522803	-0.418283	-0.15	0.120983	-0.194779	-0.0733083	-0.080292	-0.221965	0.137978	-0.335899	0.00359437	-0.00634921	-0.0219809	0.255048	-0.252295	0.112838	0.105	0.179396	0.348214	0.217221	0.349903	-0.0433455	0.0249433	0.116126	0.00149502	0.292063	0.072968	0.164964	-0.494515	0.0643697	-0.00226757	-0.167977	0.358209
HP_LOWER_EXTREMITY_JOINT_DISLOCATION	-0.081235	-0.296303	0.232433	-0.311654	-0.451365	0.0624644	-0.0108177	-0.433742	-0.535493	-0.139617	-0.275606	-0.239064	-0.10086	-0.116597	-0.312455	-0.376697	-0.522803	-0.418283	-0.15	0.120983	-0.194779	-0.0733083	-0.080292	-0.221965	0.137978	-0.335899	0.00359437	-0.00634921	-0.0219809	0.255048	-0.252295	0.112838	0.105	0.179396	0.348214	0.217221	0.349903	-0.0433455	0.0249433	0.116126	0.00149502	0.292063	0.072968	0.164964	-0.494515	0.0643697	-0.00226757	-0.167977	0.358209
HP_ABNORMALITY_OF_LOWER_LIMB_JOINT	-0.081235	-0.296303	0.232433	-0.311654	-0.451365	0.0624644	-0.0108177	-0.433742	-0.535493	-0.139617	-0.275606	-0.239064	-0.10086	-0.116597	-0.312455	-0.376697	-0.522803	-0.418283	-0.15	0.120983	-0.194779	-0.0733083	-0.080292	-0.221965	0.137978	-0.335899	0.00359437	-0.00634921	-0.0219809	0.255048	-0.252295	0.112838	0.105	0.179396	0.348214	0.217221	0.349903	-0.0433455	0.0249433	0.116126	0.00149502	0.292063	0.072968	0.164964	-0.494515	0.0643697	-0.00226757	-0.167977	0.358209
HP_ABNORMALITY_OF_THE_CALVARIA	-0.0910804	-0.385918	0.198359	-0.367821	-0.492512	0.157757	-0.0108177	-0.455357	-0.488636	-0.122037	-0.290505	-0.176008	-0.214816	-0.305915	-0.295267	-0.414538	-0.482413	-0.382367	-0.274032	0.136804	-0.113044	0.00843465	0.0634921	-0.0687999	0.15753	-0.383239	0.165086	0.0240958	-0.127256	0.322464	-0.359748	0.343833	-0.11361	0.196884	0.505184	0.136646	0.43053	0.0599632	-0.148316	0.142121	-0.0224681	0.4	0.0912612	0.34346	-0.514531	0.0527176	0.0650407	-0.193222	0.490385
GOMF_ENDONUCLEASE_ACTIVITY	0.323077	0.462564	0.246154	0.133008	0.325335	-0.133352	0.251172	0.181794	0.315385	0.493722	0.247741	0.333361	0.481551	0.226415	0.385541	0.519064	0.541372	0.232	0.332168	-0.00267275	-0.432923	0.0173943	-0.420648	0.217548	-0.539581	0.107592	-0.107841	0.30794	-0.246733	0.0706216	0.0896552	0.111861	0.105524	-0.659077	-0.107741	-0.318599	-0.0388937	-0.363636	0.0726496	0.242754	0.233906	0.184615	-0.159729	-0.385256	-0.0565963	0.066296	-0.438576	0.368752	0.00896792
HP_ABNORMAL_SIZE_OF_THE_PALPEBRAL_FISSURES	-0.0787915	-0.253378	0.167238	-0.396963	-0.47886	0.2284	-0.0172357	-0.423246	-0.415114	-0.175129	-0.260831	-0.236274	-0.208104	-0.238757	-0.280445	-0.331887	-0.501331	-0.392363	-0.0552885	0.0383739	-0.191321	-0.0705069	0.00625173	-0.311334	0.143965	-0.183568	0.136703	-0.0179497	-0.149822	0.283392	-0.144342	0.0543293	0.121815	0.197642	0.39328	0.187728	0.377006	-0.0241758	-0.0373377	0.105004	-0.0257278	0.308194	0.0739077	0.235796	-0.332143	0.0569145	-0.075	-0.186355	0.287863
HP_ABNORMAL_PENIS_MORPHOLOGY	-0.0927098	-0.355519	0.169386	-0.385946	-0.51349	0.18034	-0.0255761	-0.505579	-0.539272	-0.0337742	-0.315565	-0.265407	-0.221337	-0.141308	-0.339523	-0.413122	-0.493672	-0.350651	-0.178007	0.175424	-0.179113	-0.0845229	0.00514461	-0.33046	0.272859	-0.356732	0.168722	0.01211	-0.0610049	0.318211	-0.241379	0.150076	0.138598	0.219	0.444914	0.137147	0.415854	0.101277	-0.0946569	0.0884129	-0.0325196	0.329601	0.148805	0.155071	-0.366402	0.0614655	0.0319964	-0.382195	0.335258
HP_ABNORMALITY_OF_THE_URETHRA	-0.0927098	-0.355519	0.169386	-0.385946	-0.51349	0.18034	-0.0255761	-0.505579	-0.539272	-0.0337742	-0.315565	-0.265407	-0.221337	-0.141308	-0.339523	-0.413122	-0.493672	-0.350651	-0.178007	0.175424	-0.179113	-0.0845229	0.00514461	-0.33046	0.272859	-0.356732	0.168722	0.01211	-0.0610049	0.318211	-0.241379	0.150076	0.138598	0.219	0.444914	0.137147	0.415854	0.101277	-0.0946569	0.0884129	-0.0325196	0.329601	0.148805	0.155071	-0.366402	0.0614655	0.0319964	-0.382195	0.335258
HP_PES_PLANUS	-0.0927098	-0.355519	0.169386	-0.385946	-0.51349	0.18034	-0.0255761	-0.505579	-0.539272	-0.0337742	-0.315565	-0.265407	-0.221337	-0.141308	-0.339523	-0.413122	-0.493672	-0.350651	-0.178007	0.175424	-0.179113	-0.0845229	0.00514461	-0.33046	0.272859	-0.356732	0.168722	0.01211	-0.0610049	0.318211	-0.241379	0.150076	0.138598	0.219	0.444914	0.137147	0.415854	0.101277	-0.0946569	0.0884129	-0.0325196	0.329601	0.148805	0.155071	-0.366402	0.0614655	0.0319964	-0.382195	0.335258
HP_HYPERTROPHIC_CARDIOMYOPATHY	-0.00201807	-0.45242	0.253744	-0.378317	-0.486815	0.147203	0.0333024	-0.496601	-0.591799	-0.12285	-0.346371	-0.226177	-0.213717	-0.146284	-0.297112	-0.362226	-0.480391	-0.310494	-0.367469	0.254288	-0.230891	-0.189895	0.0112294	-0.137931	0.348876	-0.28744	0.0583072	-0.077115	-0.165025	0.26601	-0.321201	0.234821	0.170354	0.227071	0.441738	0.140584	0.394793	0.124541	0.0543577	0.213727	-0.151083	0.341127	0.145472	0.154366	-0.360367	0.16954	-0.0765424	-0.224949	0.134989
HP_ABNORMAL_BONE_STRUCTURE	-0.00201807	-0.45242	0.253744	-0.378317	-0.486815	0.147203	0.0333024	-0.496601	-0.591799	-0.12285	-0.346371	-0.226177	-0.213717	-0.146284	-0.297112	-0.362226	-0.480391	-0.310494	-0.367469	0.254288	-0.230891	-0.189895	0.0112294	-0.137931	0.348876	-0.28744	0.0583072	-0.077115	-0.165025	0.26601	-0.321201	0.234821	0.170354	0.227071	0.441738	0.140584	0.394793	0.124541	0.0543577	0.213727	-0.151083	0.341127	0.145472	0.154366	-0.360367	0.16954	-0.0765424	-0.224949	0.134989
HP_ABNORMALITY_OF_BONE_MINERAL_DENSITY	-0.00201807	-0.45242	0.253744	-0.378317	-0.486815	0.147203	0.0333024	-0.496601	-0.591799	-0.12285	-0.346371	-0.226177	-0.213717	-0.146284	-0.297112	-0.362226	-0.480391	-0.310494	-0.367469	0.254288	-0.230891	-0.189895	0.0112294	-0.137931	0.348876	-0.28744	0.0583072	-0.077115	-0.165025	0.26601	-0.321201	0.234821	0.170354	0.227071	0.441738	0.140584	0.394793	0.124541	0.0543577	0.213727	-0.151083	0.341127	0.145472	0.154366	-0.360367	0.16954	-0.0765424	-0.224949	0.134989
HP_FACIAL_ASYMMETRY	-0.102436	-0.384761	0.169674	-0.39843	-0.527163	0.125745	-0.0283023	-0.518869	-0.546758	-0.0272238	-0.344769	-0.28097	-0.232388	-0.140723	-0.35088	-0.385357	-0.501092	-0.353369	-0.186165	0.126219	-0.0890707	-0.0893462	0.0831488	-0.262015	0.226398	-0.379636	0.181476	-0.0476967	-0.106842	0.330895	-0.234975	0.180334	0.144946	0.162208	0.49327	0.138389	0.436895	0.146744	-0.211139	0.10017	0.0658268	0.336848	0.0718802	0.159281	-0.367801	0.0602209	0.0378033	-0.398371	0.499577
HP_SHORT_LONG_BONE	-0.102436	-0.384761	0.169674	-0.39843	-0.527163	0.125745	-0.0283023	-0.518869	-0.546758	-0.0272238	-0.344769	-0.28097	-0.232388	-0.140723	-0.35088	-0.385357	-0.501092	-0.353369	-0.186165	0.126219	-0.0890707	-0.0893462	0.0831488	-0.262015	0.226398	-0.379636	0.181476	-0.0476967	-0.106842	0.330895	-0.234975	0.180334	0.144946	0.162208	0.49327	0.138389	0.436895	0.146744	-0.211139	0.10017	0.0658268	0.336848	0.0718802	0.159281	-0.367801	0.0602209	0.0378033	-0.398371	0.499577
HP_UPPER_LIMB_UNDERGROWTH	-0.102436	-0.384761	0.169674	-0.39843	-0.527163	0.125745	-0.0283023	-0.518869	-0.546758	-0.0272238	-0.344769	-0.28097	-0.232388	-0.140723	-0.35088	-0.385357	-0.501092	-0.353369	-0.186165	0.126219	-0.0890707	-0.0893462	0.0831488	-0.262015	0.226398	-0.379636	0.181476	-0.0476967	-0.106842	0.330895	-0.234975	0.180334	0.144946	0.162208	0.49327	0.138389	0.436895	0.146744	-0.211139	0.10017	0.0658268	0.336848	0.0718802	0.159281	-0.367801	0.0602209	0.0378033	-0.398371	0.499577
HP_LIMB_UNDERGROWTH	-0.102436	-0.384761	0.169674	-0.39843	-0.527163	0.125745	-0.0283023	-0.518869	-0.546758	-0.0272238	-0.344769	-0.28097	-0.232388	-0.140723	-0.35088	-0.385357	-0.501092	-0.353369	-0.186165	0.126219	-0.0890707	-0.0893462	0.0831488	-0.262015	0.226398	-0.379636	0.181476	-0.0476967	-0.106842	0.330895	-0.234975	0.180334	0.144946	0.162208	0.49327	0.138389	0.436895	0.146744	-0.211139	0.10017	0.0658268	0.336848	0.0718802	0.159281	-0.367801	0.0602209	0.0378033	-0.398371	0.499577
HP_ABNORMAL_FOREARM_BONE_MORPHOLOGY	-0.102436	-0.384761	0.169674	-0.39843	-0.527163	0.125745	-0.0283023	-0.518869	-0.546758	-0.0272238	-0.344769	-0.28097	-0.232388	-0.140723	-0.35088	-0.385357	-0.501092	-0.353369	-0.186165	0.126219	-0.0890707	-0.0893462	0.0831488	-0.262015	0.226398	-0.379636	0.181476	-0.0476967	-0.106842	0.330895	-0.234975	0.180334	0.144946	0.162208	0.49327	0.138389	0.436895	0.146744	-0.211139	0.10017	0.0658268	0.336848	0.0718802	0.159281	-0.367801	0.0602209	0.0378033	-0.398371	0.499577
HP_DISPLACEMENT_OF_THE_URETHRAL_MEATUS	-0.102436	-0.384761	0.169674	-0.39843	-0.527163	0.125745	-0.0283023	-0.518869	-0.546758	-0.0272238	-0.344769	-0.28097	-0.232388	-0.140723	-0.35088	-0.385357	-0.501092	-0.353369	-0.186165	0.126219	-0.0890707	-0.0893462	0.0831488	-0.262015	0.226398	-0.379636	0.181476	-0.0476967	-0.106842	0.330895	-0.234975	0.180334	0.144946	0.162208	0.49327	0.138389	0.436895	0.146744	-0.211139	0.10017	0.0658268	0.336848	0.0718802	0.159281	-0.367801	0.0602209	0.0378033	-0.398371	0.499577
HP_ABNORMALITY_OF_GLOBE_SIZE	-0.0879773	-0.272065	0.167441	-0.409111	-0.497549	0.201754	-0.0201142	-0.435095	-0.416009	-0.161997	-0.27556	-0.251493	-0.218045	-0.237817	-0.287108	-0.288762	-0.507764	-0.38941	-0.0626384	-0.0200688	-0.111968	-0.0748795	0.0822189	-0.230009	0.095655	-0.199029	0.143875	-0.0943104	-0.184211	0.293381	-0.134126	0.0753006	0.142088	0.141214	0.43724	0.193231	0.397326	-0.011776	-0.137792	0.122269	0.0803943	0.319703	-0.00399837	0.220273	-0.333901	0.0545719	-0.037594	-0.19664	0.43584
HP_ABNORMALITY_OF_LONG_BONE_MORPHOLOGY	-0.0750802	-0.24292	0.120364	-0.432793	-0.465632	0.271582	-0.0138988	-0.40567	-0.41359	-0.173217	-0.257281	-0.215909	-0.20404	-0.24802	-0.26202	-0.36776	-0.475417	-0.384294	-0.0961999	0.110707	-0.186014	0.01383	-0.00563094	-0.304911	0.198735	-0.172307	0.211181	0.0667674	-0.1493	0.32873	-0.156656	0.119257	0.00530741	0.257535	0.429083	0.170455	0.35994	-0.0123167	-0.112237	0.0364129	-0.0232019	0.349022	0.157455	0.287342	-0.326196	0.144367	0.0352183	-0.177441	0.280087
HP_HYPERREFLEXIA	-0.00400608	-0.437118	0.308204	-0.355153	-0.510547	0.139569	0.0621769	-0.43209	-0.505822	-0.183795	-0.306929	-0.0909091	-0.221035	-0.241311	-0.270065	-0.412281	-0.511113	-0.386418	-0.233623	0.243839	-0.30234	-0.110194	-0.082996	-0.00979192	0.130376	-0.333333	0.0647148	0.0185505	-0.10307	0.160132	-0.322075	0.301462	0.167661	0.186711	0.289171	0.0313046	0.36149	0.122846	0.0579278	0.150899	-0.127415	0.447077	0.0814083	0.112544	-0.448838	0.1662	-0.00779727	-0.126913	0.243448
HP_HYDROURETER	-0.020298	-0.544592	0.284192	-0.408929	-0.547718	0.12992	0.0525641	-0.524691	-0.569424	-0.111296	-0.363889	-0.194857	-0.238076	-0.147983	-0.314493	-0.391221	-0.502222	-0.354404	-0.342424	0.150148	-0.200376	-0.133503	-0.0111111	-0.164075	0.338549	-0.333333	0.186504	-0.144737	-0.231982	0.287457	-0.284314	0.208333	0.229926	0.174007	0.491185	0.140236	0.442262	0.147967	-0.161423	0.145343	0.0166667	0.449275	0.0772487	0.1591	-0.366438	0.168969	0.0438931	-0.361435	0.451719
HP_HYDROCEPHALUS	-0.020298	-0.544592	0.284192	-0.408929	-0.547718	0.12992	0.0525641	-0.524691	-0.569424	-0.111296	-0.363889	-0.194857	-0.238076	-0.147983	-0.314493	-0.391221	-0.502222	-0.354404	-0.342424	0.150148	-0.200376	-0.133503	-0.0111111	-0.164075	0.338549	-0.333333	0.186504	-0.144737	-0.231982	0.287457	-0.284314	0.208333	0.229926	0.174007	0.491185	0.140236	0.442262	0.147967	-0.161423	0.145343	0.0166667	0.449275	0.0772487	0.1591	-0.366438	0.168969	0.0438931	-0.361435	0.451719
HP_PROPTOSIS	-0.020298	-0.544592	0.284192	-0.408929	-0.547718	0.12992	0.0525641	-0.524691	-0.569424	-0.111296	-0.363889	-0.194857	-0.238076	-0.147983	-0.314493	-0.391221	-0.502222	-0.354404	-0.342424	0.150148	-0.200376	-0.133503	-0.0111111	-0.164075	0.338549	-0.333333	0.186504	-0.144737	-0.231982	0.287457	-0.284314	0.208333	0.229926	0.174007	0.491185	0.140236	0.442262	0.147967	-0.161423	0.145343	0.0166667	0.449275	0.0772487	0.1591	-0.366438	0.168969	0.0438931	-0.361435	0.451719
HP_BICORNUATE_UTERUS	-0.020298	-0.544592	0.284192	-0.408929	-0.547718	0.12992	0.0525641	-0.524691	-0.569424	-0.111296	-0.363889	-0.194857	-0.238076	-0.147983	-0.314493	-0.391221	-0.502222	-0.354404	-0.342424	0.150148	-0.200376	-0.133503	-0.0111111	-0.164075	0.338549	-0.333333	0.186504	-0.144737	-0.231982	0.287457	-0.284314	0.208333	0.229926	0.174007	0.491185	0.140236	0.442262	0.147967	-0.161423	0.145343	0.0166667	0.449275	0.0772487	0.1591	-0.366438	0.168969	0.0438931	-0.361435	0.451719
HP_TRIPHALANGEAL_THUMB	-0.020298	-0.544592	0.284192	-0.408929	-0.547718	0.12992	0.0525641	-0.524691	-0.569424	-0.111296	-0.363889	-0.194857	-0.238076	-0.147983	-0.314493	-0.391221	-0.502222	-0.354404	-0.342424	0.150148	-0.200376	-0.133503	-0.0111111	-0.164075	0.338549	-0.333333	0.186504	-0.144737	-0.231982	0.287457	-0.284314	0.208333	0.229926	0.174007	0.491185	0.140236	0.442262	0.147967	-0.161423	0.145343	0.0166667	0.449275	0.0772487	0.1591	-0.366438	0.168969	0.0438931	-0.361435	0.451719
HP_CLUBBING	-0.020298	-0.544592	0.284192	-0.408929	-0.547718	0.12992	0.0525641	-0.524691	-0.569424	-0.111296	-0.363889	-0.194857	-0.238076	-0.147983	-0.314493	-0.391221	-0.502222	-0.354404	-0.342424	0.150148	-0.200376	-0.133503	-0.0111111	-0.164075	0.338549	-0.333333	0.186504	-0.144737	-0.231982	0.287457	-0.284314	0.208333	0.229926	0.174007	0.491185	0.140236	0.442262	0.147967	-0.161423	0.145343	0.0166667	0.449275	0.0772487	0.1591	-0.366438	0.168969	0.0438931	-0.361435	0.451719
HP_ABNORMAL_ILEUM_MORPHOLOGY	-0.020298	-0.544592	0.284192	-0.408929	-0.547718	0.12992	0.0525641	-0.524691	-0.569424	-0.111296	-0.363889	-0.194857	-0.238076	-0.147983	-0.314493	-0.391221	-0.502222	-0.354404	-0.342424	0.150148	-0.200376	-0.133503	-0.0111111	-0.164075	0.338549	-0.333333	0.186504	-0.144737	-0.231982	0.287457	-0.284314	0.208333	0.229926	0.174007	0.491185	0.140236	0.442262	0.147967	-0.161423	0.145343	0.0166667	0.449275	0.0772487	0.1591	-0.366438	0.168969	0.0438931	-0.361435	0.451719
HP_ABNORMALITY_OF_THE_AMNIOTIC_FLUID	-0.020298	-0.544592	0.284192	-0.408929	-0.547718	0.12992	0.0525641	-0.524691	-0.569424	-0.111296	-0.363889	-0.194857	-0.238076	-0.147983	-0.314493	-0.391221	-0.502222	-0.354404	-0.342424	0.150148	-0.200376	-0.133503	-0.0111111	-0.164075	0.338549	-0.333333	0.186504	-0.144737	-0.231982	0.287457	-0.284314	0.208333	0.229926	0.174007	0.491185	0.140236	0.442262	0.147967	-0.161423	0.145343	0.0166667	0.449275	0.0772487	0.1591	-0.366438	0.168969	0.0438931	-0.361435	0.451719
HP_OLIGOHYDRAMNIOS	-0.020298	-0.544592	0.284192	-0.408929	-0.547718	0.12992	0.0525641	-0.524691	-0.569424	-0.111296	-0.363889	-0.194857	-0.238076	-0.147983	-0.314493	-0.391221	-0.502222	-0.354404	-0.342424	0.150148	-0.200376	-0.133503	-0.0111111	-0.164075	0.338549	-0.333333	0.186504	-0.144737	-0.231982	0.287457	-0.284314	0.208333	0.229926	0.174007	0.491185	0.140236	0.442262	0.147967	-0.161423	0.145343	0.0166667	0.449275	0.0772487	0.1591	-0.366438	0.168969	0.0438931	-0.361435	0.451719
HP_SIDEROBLASTIC_ANEMIA	-0.020298	-0.544592	0.284192	-0.408929	-0.547718	0.12992	0.0525641	-0.524691	-0.569424	-0.111296	-0.363889	-0.194857	-0.238076	-0.147983	-0.314493	-0.391221	-0.502222	-0.354404	-0.342424	0.150148	-0.200376	-0.133503	-0.0111111	-0.164075	0.338549	-0.333333	0.186504	-0.144737	-0.231982	0.287457	-0.284314	0.208333	0.229926	0.174007	0.491185	0.140236	0.442262	0.147967	-0.161423	0.145343	0.0166667	0.449275	0.0772487	0.1591	-0.366438	0.168969	0.0438931	-0.361435	0.451719
HP_ABNORMALITY_OF_THE_SMALL_INTESTINE	-0.020298	-0.544592	0.284192	-0.408929	-0.547718	0.12992	0.0525641	-0.524691	-0.569424	-0.111296	-0.363889	-0.194857	-0.238076	-0.147983	-0.314493	-0.391221	-0.502222	-0.354404	-0.342424	0.150148	-0.200376	-0.133503	-0.0111111	-0.164075	0.338549	-0.333333	0.186504	-0.144737	-0.231982	0.287457	-0.284314	0.208333	0.229926	0.174007	0.491185	0.140236	0.442262	0.147967	-0.161423	0.145343	0.0166667	0.449275	0.0772487	0.1591	-0.366438	0.168969	0.0438931	-0.361435	0.451719
HP_ABNORMAL_DUODENUM_MORPHOLOGY	-0.020298	-0.544592	0.284192	-0.408929	-0.547718	0.12992	0.0525641	-0.524691	-0.569424	-0.111296	-0.363889	-0.194857	-0.238076	-0.147983	-0.314493	-0.391221	-0.502222	-0.354404	-0.342424	0.150148	-0.200376	-0.133503	-0.0111111	-0.164075	0.338549	-0.333333	0.186504	-0.144737	-0.231982	0.287457	-0.284314	0.208333	0.229926	0.174007	0.491185	0.140236	0.442262	0.147967	-0.161423	0.145343	0.0166667	0.449275	0.0772487	0.1591	-0.366438	0.168969	0.0438931	-0.361435	0.451719
HP_AGANGLIONIC_MEGACOLON	-0.020298	-0.544592	0.284192	-0.408929	-0.547718	0.12992	0.0525641	-0.524691	-0.569424	-0.111296	-0.363889	-0.194857	-0.238076	-0.147983	-0.314493	-0.391221	-0.502222	-0.354404	-0.342424	0.150148	-0.200376	-0.133503	-0.0111111	-0.164075	0.338549	-0.333333	0.186504	-0.144737	-0.231982	0.287457	-0.284314	0.208333	0.229926	0.174007	0.491185	0.140236	0.442262	0.147967	-0.161423	0.145343	0.0166667	0.449275	0.0772487	0.1591	-0.366438	0.168969	0.0438931	-0.361435	0.451719
HP_ABNORMALITY_OF_FEMUR_MORPHOLOGY	-0.020298	-0.544592	0.284192	-0.408929	-0.547718	0.12992	0.0525641	-0.524691	-0.569424	-0.111296	-0.363889	-0.194857	-0.238076	-0.147983	-0.314493	-0.391221	-0.502222	-0.354404	-0.342424	0.150148	-0.200376	-0.133503	-0.0111111	-0.164075	0.338549	-0.333333	0.186504	-0.144737	-0.231982	0.287457	-0.284314	0.208333	0.229926	0.174007	0.491185	0.140236	0.442262	0.147967	-0.161423	0.145343	0.0166667	0.449275	0.0772487	0.1591	-0.366438	0.168969	0.0438931	-0.361435	0.451719
HP_ABNORMALITY_OF_THE_CEREBROSPINAL_FLUID	-0.020298	-0.544592	0.284192	-0.408929	-0.547718	0.12992	0.0525641	-0.524691	-0.569424	-0.111296	-0.363889	-0.194857	-0.238076	-0.147983	-0.314493	-0.391221	-0.502222	-0.354404	-0.342424	0.150148	-0.200376	-0.133503	-0.0111111	-0.164075	0.338549	-0.333333	0.186504	-0.144737	-0.231982	0.287457	-0.284314	0.208333	0.229926	0.174007	0.491185	0.140236	0.442262	0.147967	-0.161423	0.145343	0.0166667	0.449275	0.0772487	0.1591	-0.366438	0.168969	0.0438931	-0.361435	0.451719
HP_PYRIDOXINE_RESPONSIVE_SIDEROBLASTIC_ANEMIA	-0.020298	-0.544592	0.284192	-0.408929	-0.547718	0.12992	0.0525641	-0.524691	-0.569424	-0.111296	-0.363889	-0.194857	-0.238076	-0.147983	-0.314493	-0.391221	-0.502222	-0.354404	-0.342424	0.150148	-0.200376	-0.133503	-0.0111111	-0.164075	0.338549	-0.333333	0.186504	-0.144737	-0.231982	0.287457	-0.284314	0.208333	0.229926	0.174007	0.491185	0.140236	0.442262	0.147967	-0.161423	0.145343	0.0166667	0.449275	0.0772487	0.1591	-0.366438	0.168969	0.0438931	-0.361435	0.451719
HP_APLASIA_HYPOPLASIA_OF_THE_ULNA	-0.020298	-0.544592	0.284192	-0.408929	-0.547718	0.12992	0.0525641	-0.524691	-0.569424	-0.111296	-0.363889	-0.194857	-0.238076	-0.147983	-0.314493	-0.391221	-0.502222	-0.354404	-0.342424	0.150148	-0.200376	-0.133503	-0.0111111	-0.164075	0.338549	-0.333333	0.186504	-0.144737	-0.231982	0.287457	-0.284314	0.208333	0.229926	0.174007	0.491185	0.140236	0.442262	0.147967	-0.161423	0.145343	0.0166667	0.449275	0.0772487	0.1591	-0.366438	0.168969	0.0438931	-0.361435	0.451719
HP_EXTERNAL_EAR_MALFORMATION	-0.020298	-0.544592	0.284192	-0.408929	-0.547718	0.12992	0.0525641	-0.524691	-0.569424	-0.111296	-0.363889	-0.194857	-0.238076	-0.147983	-0.314493	-0.391221	-0.502222	-0.354404	-0.342424	0.150148	-0.200376	-0.133503	-0.0111111	-0.164075	0.338549	-0.333333	0.186504	-0.144737	-0.231982	0.287457	-0.284314	0.208333	0.229926	0.174007	0.491185	0.140236	0.442262	0.147967	-0.161423	0.145343	0.0166667	0.449275	0.0772487	0.1591	-0.366438	0.168969	0.0438931	-0.361435	0.451719
HP_ABNORMALITY_OF_THE_PHALANGES_OF_THE_TOES	-0.020298	-0.544592	0.284192	-0.408929	-0.547718	0.12992	0.0525641	-0.524691	-0.569424	-0.111296	-0.363889	-0.194857	-0.238076	-0.147983	-0.314493	-0.391221	-0.502222	-0.354404	-0.342424	0.150148	-0.200376	-0.133503	-0.0111111	-0.164075	0.338549	-0.333333	0.186504	-0.144737	-0.231982	0.287457	-0.284314	0.208333	0.229926	0.174007	0.491185	0.140236	0.442262	0.147967	-0.161423	0.145343	0.0166667	0.449275	0.0772487	0.1591	-0.366438	0.168969	0.0438931	-0.361435	0.451719
HP_APLASIA_HYPOPLASIA_OF_THE_UVULA	-0.020298	-0.544592	0.284192	-0.408929	-0.547718	0.12992	0.0525641	-0.524691	-0.569424	-0.111296	-0.363889	-0.194857	-0.238076	-0.147983	-0.314493	-0.391221	-0.502222	-0.354404	-0.342424	0.150148	-0.200376	-0.133503	-0.0111111	-0.164075	0.338549	-0.333333	0.186504	-0.144737	-0.231982	0.287457	-0.284314	0.208333	0.229926	0.174007	0.491185	0.140236	0.442262	0.147967	-0.161423	0.145343	0.0166667	0.449275	0.0772487	0.1591	-0.366438	0.168969	0.0438931	-0.361435	0.451719
HP_ABSENT_TESTIS	-0.020298	-0.544592	0.284192	-0.408929	-0.547718	0.12992	0.0525641	-0.524691	-0.569424	-0.111296	-0.363889	-0.194857	-0.238076	-0.147983	-0.314493	-0.391221	-0.502222	-0.354404	-0.342424	0.150148	-0.200376	-0.133503	-0.0111111	-0.164075	0.338549	-0.333333	0.186504	-0.144737	-0.231982	0.287457	-0.284314	0.208333	0.229926	0.174007	0.491185	0.140236	0.442262	0.147967	-0.161423	0.145343	0.0166667	0.449275	0.0772487	0.1591	-0.366438	0.168969	0.0438931	-0.361435	0.451719
HP_ANEMIA_OF_INADEQUATE_PRODUCTION	-0.020298	-0.544592	0.284192	-0.408929	-0.547718	0.12992	0.0525641	-0.524691	-0.569424	-0.111296	-0.363889	-0.194857	-0.238076	-0.147983	-0.314493	-0.391221	-0.502222	-0.354404	-0.342424	0.150148	-0.200376	-0.133503	-0.0111111	-0.164075	0.338549	-0.333333	0.186504	-0.144737	-0.231982	0.287457	-0.284314	0.208333	0.229926	0.174007	0.491185	0.140236	0.442262	0.147967	-0.161423	0.145343	0.0166667	0.449275	0.0772487	0.1591	-0.366438	0.168969	0.0438931	-0.361435	0.451719
HP_ABNORMAL_SHAPE_OF_THE_FRONTAL_REGION	-0.020298	-0.544592	0.284192	-0.408929	-0.547718	0.12992	0.0525641	-0.524691	-0.569424	-0.111296	-0.363889	-0.194857	-0.238076	-0.147983	-0.314493	-0.391221	-0.502222	-0.354404	-0.342424	0.150148	-0.200376	-0.133503	-0.0111111	-0.164075	0.338549	-0.333333	0.186504	-0.144737	-0.231982	0.287457	-0.284314	0.208333	0.229926	0.174007	0.491185	0.140236	0.442262	0.147967	-0.161423	0.145343	0.0166667	0.449275	0.0772487	0.1591	-0.366438	0.168969	0.0438931	-0.361435	0.451719
HP_SHORT_PALPEBRAL_FISSURE	-0.020298	-0.544592	0.284192	-0.408929	-0.547718	0.12992	0.0525641	-0.524691	-0.569424	-0.111296	-0.363889	-0.194857	-0.238076	-0.147983	-0.314493	-0.391221	-0.502222	-0.354404	-0.342424	0.150148	-0.200376	-0.133503	-0.0111111	-0.164075	0.338549	-0.333333	0.186504	-0.144737	-0.231982	0.287457	-0.284314	0.208333	0.229926	0.174007	0.491185	0.140236	0.442262	0.147967	-0.161423	0.145343	0.0166667	0.449275	0.0772487	0.1591	-0.366438	0.168969	0.0438931	-0.361435	0.451719
HP_ABNORMAL_URETER_MORPHOLOGY	-0.020298	-0.544592	0.284192	-0.408929	-0.547718	0.12992	0.0525641	-0.524691	-0.569424	-0.111296	-0.363889	-0.194857	-0.238076	-0.147983	-0.314493	-0.391221	-0.502222	-0.354404	-0.342424	0.150148	-0.200376	-0.133503	-0.0111111	-0.164075	0.338549	-0.333333	0.186504	-0.144737	-0.231982	0.287457	-0.284314	0.208333	0.229926	0.174007	0.491185	0.140236	0.442262	0.147967	-0.161423	0.145343	0.0166667	0.449275	0.0772487	0.1591	-0.366438	0.168969	0.0438931	-0.361435	0.451719
HP_ABNORMALITY_OF_THE_TESTIS_SIZE	-0.020298	-0.544592	0.284192	-0.408929	-0.547718	0.12992	0.0525641	-0.524691	-0.569424	-0.111296	-0.363889	-0.194857	-0.238076	-0.147983	-0.314493	-0.391221	-0.502222	-0.354404	-0.342424	0.150148	-0.200376	-0.133503	-0.0111111	-0.164075	0.338549	-0.333333	0.186504	-0.144737	-0.231982	0.287457	-0.284314	0.208333	0.229926	0.174007	0.491185	0.140236	0.442262	0.147967	-0.161423	0.145343	0.0166667	0.449275	0.0772487	0.1591	-0.366438	0.168969	0.0438931	-0.361435	0.451719
HP_ARTERIOVENOUS_MALFORMATION	-0.020298	-0.544592	0.284192	-0.408929	-0.547718	0.12992	0.0525641	-0.524691	-0.569424	-0.111296	-0.363889	-0.194857	-0.238076	-0.147983	-0.314493	-0.391221	-0.502222	-0.354404	-0.342424	0.150148	-0.200376	-0.133503	-0.0111111	-0.164075	0.338549	-0.333333	0.186504	-0.144737	-0.231982	0.287457	-0.284314	0.208333	0.229926	0.174007	0.491185	0.140236	0.442262	0.147967	-0.161423	0.145343	0.0166667	0.449275	0.0772487	0.1591	-0.366438	0.168969	0.0438931	-0.361435	0.451719
HP_ABNORMALITY_OF_THE_PREPUTIUM	-0.020298	-0.544592	0.284192	-0.408929	-0.547718	0.12992	0.0525641	-0.524691	-0.569424	-0.111296	-0.363889	-0.194857	-0.238076	-0.147983	-0.314493	-0.391221	-0.502222	-0.354404	-0.342424	0.150148	-0.200376	-0.133503	-0.0111111	-0.164075	0.338549	-0.333333	0.186504	-0.144737	-0.231982	0.287457	-0.284314	0.208333	0.229926	0.174007	0.491185	0.140236	0.442262	0.147967	-0.161423	0.145343	0.0166667	0.449275	0.0772487	0.1591	-0.366438	0.168969	0.0438931	-0.361435	0.451719
HP_CLUBBING_OF_TOES	-0.020298	-0.544592	0.284192	-0.408929	-0.547718	0.12992	0.0525641	-0.524691	-0.569424	-0.111296	-0.363889	-0.194857	-0.238076	-0.147983	-0.314493	-0.391221	-0.502222	-0.354404	-0.342424	0.150148	-0.200376	-0.133503	-0.0111111	-0.164075	0.338549	-0.333333	0.186504	-0.144737	-0.231982	0.287457	-0.284314	0.208333	0.229926	0.174007	0.491185	0.140236	0.442262	0.147967	-0.161423	0.145343	0.0166667	0.449275	0.0772487	0.1591	-0.366438	0.168969	0.0438931	-0.361435	0.451719
HP_DUODENAL_STENOSIS	-0.020298	-0.544592	0.284192	-0.408929	-0.547718	0.12992	0.0525641	-0.524691	-0.569424	-0.111296	-0.363889	-0.194857	-0.238076	-0.147983	-0.314493	-0.391221	-0.502222	-0.354404	-0.342424	0.150148	-0.200376	-0.133503	-0.0111111	-0.164075	0.338549	-0.333333	0.186504	-0.144737	-0.231982	0.287457	-0.284314	0.208333	0.229926	0.174007	0.491185	0.140236	0.442262	0.147967	-0.161423	0.145343	0.0166667	0.449275	0.0772487	0.1591	-0.366438	0.168969	0.0438931	-0.361435	0.451719
HP_ABNORMAL_SHAPE_OF_THE_PALPEBRAL_FISSURE	-0.020298	-0.544592	0.284192	-0.408929	-0.547718	0.12992	0.0525641	-0.524691	-0.569424	-0.111296	-0.363889	-0.194857	-0.238076	-0.147983	-0.314493	-0.391221	-0.502222	-0.354404	-0.342424	0.150148	-0.200376	-0.133503	-0.0111111	-0.164075	0.338549	-0.333333	0.186504	-0.144737	-0.231982	0.287457	-0.284314	0.208333	0.229926	0.174007	0.491185	0.140236	0.442262	0.147967	-0.161423	0.145343	0.0166667	0.449275	0.0772487	0.1591	-0.366438	0.168969	0.0438931	-0.361435	0.451719
HP_ABNORMALITY_OF_THE_PERIPHERAL_NERVOUS_SYSTEM	-0.020298	-0.544592	0.284192	-0.408929	-0.547718	0.12992	0.0525641	-0.524691	-0.569424	-0.111296	-0.363889	-0.194857	-0.238076	-0.147983	-0.314493	-0.391221	-0.502222	-0.354404	-0.342424	0.150148	-0.200376	-0.133503	-0.0111111	-0.164075	0.338549	-0.333333	0.186504	-0.144737	-0.231982	0.287457	-0.284314	0.208333	0.229926	0.174007	0.491185	0.140236	0.442262	0.147967	-0.161423	0.145343	0.0166667	0.449275	0.0772487	0.1591	-0.366438	0.168969	0.0438931	-0.361435	0.451719
HP_ABNORMALITY_OF_THE_URETER	-0.0122562	-0.496839	0.283406	-0.396461	-0.52209	0.150472	0.0553557	-0.511492	-0.561743	-0.130881	-0.333912	-0.178459	-0.223149	-0.148548	-0.303404	-0.418809	-0.494841	-0.351562	-0.328682	0.200114	-0.288486	-0.126028	-0.0889371	-0.260156	0.381356	-0.310204	0.169282	-0.0731721	-0.166281	0.274499	-0.287946	0.17501	0.201211	0.231025	0.447608	0.139797	0.421406	0.135374	-0.0431633	0.135291	-0.0801757	0.434656	0.154863	0.154842	-0.364908	0.169445	0.0373463	-0.361285	0.278695
HP_ABNORMALITY_IRIS_MORPHOLOGY	-0.0122562	-0.496839	0.283406	-0.396461	-0.52209	0.150472	0.0553557	-0.511492	-0.561743	-0.130881	-0.333912	-0.178459	-0.223149	-0.148548	-0.303404	-0.418809	-0.494841	-0.351562	-0.328682	0.200114	-0.288486	-0.126028	-0.0889371	-0.260156	0.381356	-0.310204	0.169282	-0.0731721	-0.166281	0.274499	-0.287946	0.17501	0.201211	0.231025	0.447608	0.139797	0.421406	0.135374	-0.0431633	0.135291	-0.0801757	0.434656	0.154863	0.154842	-0.364908	0.169445	0.0373463	-0.361285	0.278695
HP_ABNORMALITY_OF_PRENATAL_DEVELOPMENT_OR_BIRTH	-0.0122562	-0.496839	0.283406	-0.396461	-0.52209	0.150472	0.0553557	-0.511492	-0.561743	-0.130881	-0.333912	-0.178459	-0.223149	-0.148548	-0.303404	-0.418809	-0.494841	-0.351562	-0.328682	0.200114	-0.288486	-0.126028	-0.0889371	-0.260156	0.381356	-0.310204	0.169282	-0.0731721	-0.166281	0.274499	-0.287946	0.17501	0.201211	0.231025	0.447608	0.139797	0.421406	0.135374	-0.0431633	0.135291	-0.0801757	0.434656	0.154863	0.154842	-0.364908	0.169445	0.0373463	-0.361285	0.278695
HP_TETRALOGY_OF_FALLOT	-0.0122562	-0.496839	0.283406	-0.396461	-0.52209	0.150472	0.0553557	-0.511492	-0.561743	-0.130881	-0.333912	-0.178459	-0.223149	-0.148548	-0.303404	-0.418809	-0.494841	-0.351562	-0.328682	0.200114	-0.288486	-0.126028	-0.0889371	-0.260156	0.381356	-0.310204	0.169282	-0.0731721	-0.166281	0.274499	-0.287946	0.17501	0.201211	0.231025	0.447608	0.139797	0.421406	0.135374	-0.0431633	0.135291	-0.0801757	0.434656	0.154863	0.154842	-0.364908	0.169445	0.0373463	-0.361285	0.278695
HP_PATENT_DUCTUS_ARTERIOSUS	-0.0122562	-0.496839	0.283406	-0.396461	-0.52209	0.150472	0.0553557	-0.511492	-0.561743	-0.130881	-0.333912	-0.178459	-0.223149	-0.148548	-0.303404	-0.418809	-0.494841	-0.351562	-0.328682	0.200114	-0.288486	-0.126028	-0.0889371	-0.260156	0.381356	-0.310204	0.169282	-0.0731721	-0.166281	0.274499	-0.287946	0.17501	0.201211	0.231025	0.447608	0.139797	0.421406	0.135374	-0.0431633	0.135291	-0.0801757	0.434656	0.154863	0.154842	-0.364908	0.169445	0.0373463	-0.361285	0.278695
HP_ABNORMAL_AORTIC_VALVE_MORPHOLOGY	-0.0122562	-0.496839	0.283406	-0.396461	-0.52209	0.150472	0.0553557	-0.511492	-0.561743	-0.130881	-0.333912	-0.178459	-0.223149	-0.148548	-0.303404	-0.418809	-0.494841	-0.351562	-0.328682	0.200114	-0.288486	-0.126028	-0.0889371	-0.260156	0.381356	-0.310204	0.169282	-0.0731721	-0.166281	0.274499	-0.287946	0.17501	0.201211	0.231025	0.447608	0.139797	0.421406	0.135374	-0.0431633	0.135291	-0.0801757	0.434656	0.154863	0.154842	-0.364908	0.169445	0.0373463	-0.361285	0.278695
HP_ABNORMAL_HEART_VALVE_MORPHOLOGY	-0.0122562	-0.496839	0.283406	-0.396461	-0.52209	0.150472	0.0553557	-0.511492	-0.561743	-0.130881	-0.333912	-0.178459	-0.223149	-0.148548	-0.303404	-0.418809	-0.494841	-0.351562	-0.328682	0.200114	-0.288486	-0.126028	-0.0889371	-0.260156	0.381356	-0.310204	0.169282	-0.0731721	-0.166281	0.274499	-0.287946	0.17501	0.201211	0.231025	0.447608	0.139797	0.421406	0.135374	-0.0431633	0.135291	-0.0801757	0.434656	0.154863	0.154842	-0.364908	0.169445	0.0373463	-0.361285	0.278695
HP_ABNORMALITY_OF_THE_SPINAL_CORD	-0.0122562	-0.496839	0.283406	-0.396461	-0.52209	0.150472	0.0553557	-0.511492	-0.561743	-0.130881	-0.333912	-0.178459	-0.223149	-0.148548	-0.303404	-0.418809	-0.494841	-0.351562	-0.328682	0.200114	-0.288486	-0.126028	-0.0889371	-0.260156	0.381356	-0.310204	0.169282	-0.0731721	-0.166281	0.274499	-0.287946	0.17501	0.201211	0.231025	0.447608	0.139797	0.421406	0.135374	-0.0431633	0.135291	-0.0801757	0.434656	0.154863	0.154842	-0.364908	0.169445	0.0373463	-0.361285	0.278695
HP_TRACHEOESOPHAGEAL_FISTULA	-0.0122562	-0.496839	0.283406	-0.396461	-0.52209	0.150472	0.0553557	-0.511492	-0.561743	-0.130881	-0.333912	-0.178459	-0.223149	-0.148548	-0.303404	-0.418809	-0.494841	-0.351562	-0.328682	0.200114	-0.288486	-0.126028	-0.0889371	-0.260156	0.381356	-0.310204	0.169282	-0.0731721	-0.166281	0.274499	-0.287946	0.17501	0.201211	0.231025	0.447608	0.139797	0.421406	0.135374	-0.0431633	0.135291	-0.0801757	0.434656	0.154863	0.154842	-0.364908	0.169445	0.0373463	-0.361285	0.278695
HP_ABNORMAL_TRACHEA_MORPHOLOGY	-0.0122562	-0.496839	0.283406	-0.396461	-0.52209	0.150472	0.0553557	-0.511492	-0.561743	-0.130881	-0.333912	-0.178459	-0.223149	-0.148548	-0.303404	-0.418809	-0.494841	-0.351562	-0.328682	0.200114	-0.288486	-0.126028	-0.0889371	-0.260156	0.381356	-0.310204	0.169282	-0.0731721	-0.166281	0.274499	-0.287946	0.17501	0.201211	0.231025	0.447608	0.139797	0.421406	0.135374	-0.0431633	0.135291	-0.0801757	0.434656	0.154863	0.154842	-0.364908	0.169445	0.0373463	-0.361285	0.278695
HP_ABNORMAL_CAROTID_ARTERY_MORPHOLOGY	-0.0122562	-0.496839	0.283406	-0.396461	-0.52209	0.150472	0.0553557	-0.511492	-0.561743	-0.130881	-0.333912	-0.178459	-0.223149	-0.148548	-0.303404	-0.418809	-0.494841	-0.351562	-0.328682	0.200114	-0.288486	-0.126028	-0.0889371	-0.260156	0.381356	-0.310204	0.169282	-0.0731721	-0.166281	0.274499	-0.287946	0.17501	0.201211	0.231025	0.447608	0.139797	0.421406	0.135374	-0.0431633	0.135291	-0.0801757	0.434656	0.154863	0.154842	-0.364908	0.169445	0.0373463	-0.361285	0.278695
HP_SPINAL_DYSRAPHISM	-0.0122562	-0.496839	0.283406	-0.396461	-0.52209	0.150472	0.0553557	-0.511492	-0.561743	-0.130881	-0.333912	-0.178459	-0.223149	-0.148548	-0.303404	-0.418809	-0.494841	-0.351562	-0.328682	0.200114	-0.288486	-0.126028	-0.0889371	-0.260156	0.381356	-0.310204	0.169282	-0.0731721	-0.166281	0.274499	-0.287946	0.17501	0.201211	0.231025	0.447608	0.139797	0.421406	0.135374	-0.0431633	0.135291	-0.0801757	0.434656	0.154863	0.154842	-0.364908	0.169445	0.0373463	-0.361285	0.278695
HP_ABNORMAL_CONNECTION_OF_THE_CARDIAC_SEGMENTS	-0.0122562	-0.496839	0.283406	-0.396461	-0.52209	0.150472	0.0553557	-0.511492	-0.561743	-0.130881	-0.333912	-0.178459	-0.223149	-0.148548	-0.303404	-0.418809	-0.494841	-0.351562	-0.328682	0.200114	-0.288486	-0.126028	-0.0889371	-0.260156	0.381356	-0.310204	0.169282	-0.0731721	-0.166281	0.274499	-0.287946	0.17501	0.201211	0.231025	0.447608	0.139797	0.421406	0.135374	-0.0431633	0.135291	-0.0801757	0.434656	0.154863	0.154842	-0.364908	0.169445	0.0373463	-0.361285	0.278695
HP_CONGENITAL_MALFORMATION_OF_THE_GREAT_ARTERIES	-0.0122562	-0.496839	0.283406	-0.396461	-0.52209	0.150472	0.0553557	-0.511492	-0.561743	-0.130881	-0.333912	-0.178459	-0.223149	-0.148548	-0.303404	-0.418809	-0.494841	-0.351562	-0.328682	0.200114	-0.288486	-0.126028	-0.0889371	-0.260156	0.381356	-0.310204	0.169282	-0.0731721	-0.166281	0.274499	-0.287946	0.17501	0.201211	0.231025	0.447608	0.139797	0.421406	0.135374	-0.0431633	0.135291	-0.0801757	0.434656	0.154863	0.154842	-0.364908	0.169445	0.0373463	-0.361285	0.278695
HP_ABNORMAL_LOCALIZATION_OF_KIDNEY	-0.0122562	-0.496839	0.283406	-0.396461	-0.52209	0.150472	0.0553557	-0.511492	-0.561743	-0.130881	-0.333912	-0.178459	-0.223149	-0.148548	-0.303404	-0.418809	-0.494841	-0.351562	-0.328682	0.200114	-0.288486	-0.126028	-0.0889371	-0.260156	0.381356	-0.310204	0.169282	-0.0731721	-0.166281	0.274499	-0.287946	0.17501	0.201211	0.231025	0.447608	0.139797	0.421406	0.135374	-0.0431633	0.135291	-0.0801757	0.434656	0.154863	0.154842	-0.364908	0.169445	0.0373463	-0.361285	0.278695
HP_ABNORMAL_NEURAL_TUBE_MORPHOLOGY	-0.0122562	-0.496839	0.283406	-0.396461	-0.52209	0.150472	0.0553557	-0.511492	-0.561743	-0.130881	-0.333912	-0.178459	-0.223149	-0.148548	-0.303404	-0.418809	-0.494841	-0.351562	-0.328682	0.200114	-0.288486	-0.126028	-0.0889371	-0.260156	0.381356	-0.310204	0.169282	-0.0731721	-0.166281	0.274499	-0.287946	0.17501	0.201211	0.231025	0.447608	0.139797	0.421406	0.135374	-0.0431633	0.135291	-0.0801757	0.434656	0.154863	0.154842	-0.364908	0.169445	0.0373463	-0.361285	0.278695
HP_APLASIA_HYPOPLASIA_AFFECTING_THE_EYE	-0.000314084	-0.391495	0.278876	-0.407233	-0.492797	0.219008	0.0628947	-0.429111	-0.422617	-0.250579	-0.269203	-0.147722	-0.212848	-0.249815	-0.240347	-0.332609	-0.50227	-0.388656	-0.212248	0.108536	-0.299922	-0.104304	-0.0850622	-0.227889	0.23439	-0.133104	0.140501	-0.122612	-0.253974	0.234886	-0.165226	0.0719298	0.180875	0.209177	0.402169	0.177022	0.382959	-0.0124467	0.00272641	0.148763	-0.0697807	0.405322	0.0777274	0.240351	-0.331291	0.15251	-0.0837864	-0.12192	0.23162
HP_ABNORMALITY_OF_THE_FOREARM	-0.0773529	-0.337338	0.166149	-0.31323	-0.397644	0.162815	-0.012199	-0.429204	-0.404077	-0.120087	-0.277674	-0.169077	-0.212535	-0.238268	-0.169931	-0.308925	-0.514702	-0.417278	-0.162371	0.200924	-0.194	-0.0729916	0.00634083	-0.219812	0.144521	-0.219472	-0.0399837	-0.0105497	-0.0988722	0.287734	-0.308079	0.211922	-0.00857143	0.196731	0.444761	0.23343	0.338906	0.0369048	0.0149744	0.0567285	0.0362851	0.365554	0.0852878	0.220899	-0.343381	0.0642857	-0.0593818	-0.267208	0.171533
HP_HYPERPIGMENTATION_OF_THE_SKIN	-0.097488	-0.491929	0.350255	-0.366289	-0.548095	0.200619	0.16193	-0.331292	-0.582415	-0.271145	-0.266667	-0.190697	-0.207023	-0.25	-0.325852	-0.329134	-0.485476	-0.413104	-0.241028	0.182301	-0.262069	0.00106838	-0.0150249	-0.0612835	0.30107	-0.38313	0.0227743	-0.136204	-0.226508	0.148268	-0.280588	0.254546	0.286458	0.0607776	0.46118	0.203546	0.343885	0.13786	-0.102531	0.262638	-0.00183578	0.457178	0.021874	0.343329	-0.382114	0.0599343	-0.106713	-0.0988647	0.432825
HP_ABNORMAL_MYOCARDIUM_MORPHOLOGY	0.0048829	-0.533118	0.32561	-0.366022	-0.483488	0.118384	0.0438596	-0.488836	-0.562469	-0.00892857	-0.377046	-0.21164	-0.212848	-0.143521	-0.272046	-0.356831	-0.388446	-0.313411	-0.357923	0.113972	-0.227958	-0.187744	-0.00332553	-0.134261	0.332889	-0.33176	0.054269	-0.219122	-0.165999	0.220019	-0.343218	0.221906	0.0487094	0.0816654	0.48283	0.140124	0.376973	0.148279	0.0520617	0.229441	-0.207229	0.403383	0.136025	0.149613	-0.358913	0.0878522	-0.0788314	-0.152801	0.117675
HP_ABNORMALITY_OF_THE_UVULA	-0.114267	-0.575104	0.279158	-0.375537	-0.520415	0.127278	0.0575424	-0.491928	-0.540298	-0.109218	-0.34211	-0.169588	-0.229124	-0.141361	-0.295527	-0.369525	-0.485119	-0.312178	-0.296345	0.135691	-0.195426	-0.120527	0.0432649	-0.152877	0.319595	-0.320146	0.241711	-0.150256	-0.218345	0.244401	-0.288378	0.187195	0.141412	0.0773278	0.491796	0.137926	0.466746	0.145116	-0.20371	0.0881356	0.0556967	0.471355	0.0705416	0.153432	-0.357393	0.166756	0.0815019	-0.356486	0.427568
HP_ABNORMAL_SOFT_PALATE_MORPHOLOGY	-0.114267	-0.575104	0.279158	-0.375537	-0.520415	0.127278	0.0575424	-0.491928	-0.540298	-0.109218	-0.34211	-0.169588	-0.229124	-0.141361	-0.295527	-0.369525	-0.485119	-0.312178	-0.296345	0.135691	-0.195426	-0.120527	0.0432649	-0.152877	0.319595	-0.320146	0.241711	-0.150256	-0.218345	0.244401	-0.288378	0.187195	0.141412	0.0773278	0.491796	0.137926	0.466746	0.145116	-0.20371	0.0881356	0.0556967	0.471355	0.0705416	0.153432	-0.357393	0.166756	0.0815019	-0.356486	0.427568
HP_ABNORMAL_UVEA_MORPHOLOGY	-0.00515177	-0.493699	0.357432	-0.327877	-0.506335	0.144028	0.0667676	-0.466477	-0.510257	-0.189796	-0.288965	-0.088	-0.213983	-0.241821	-0.275056	-0.414631	-0.503361	-0.382728	-0.35391	0.165459	-0.311142	-0.110699	-0.085595	-0.0658242	0.239901	-0.335555	0.0840869	-0.118679	-0.182101	0.217714	-0.350568	0.289972	0.0991586	0.200784	0.412388	0.139053	0.438137	0.0519979	0.0560194	0.285343	-0.153601	0.44068	0.0803864	0.263113	-0.524442	0.058299	-0.0820388	-0.125929	0.296651
HP_GAIT_DISTURBANCE	0.10101	0.182953	0.227273	0.136364	0.496435	0.263258	0.494444	0.746851	0.115726	0.20934	0.189605	0.000178253	0.347912	0.325537	0.128826	0.58525	0.488114	0.338544	0.575337	0.0110896	-0.371523	0.327214	-0.700932	0.0434783	-0.303833	0.179849	-0.259678	-0.0305911	-0.259259	-0.450869	-0.0338681	-0.132936	-0.0360834	-0.425974	-0.213131	0.262139	-0.579545	-0.08955	-0.0261842	-0.0938416	-0.0585082	0.432551	0.311027	-0.163978	-0.0571096	0.13756	-0.0656566	0.375867	-0.477162
HP_RENAL_INSUFFICIENCY	0.0450237	-0.408801	0.254136	-0.408075	-0.493421	0.144382	0.000582024	-0.478443	-0.567073	0.00440529	-0.22162	-0.19084	-0.202597	-0.145857	-0.282271	-0.352529	-0.455817	-0.314431	-0.335979	0.300026	-0.181054	-0.185216	0.0115558	-0.137071	0.335792	-0.237489	0.0539931	0.0127967	-0.164055	0.316145	-0.307152	0.281006	0.199402	0.206335	0.416854	0.0651629	0.343059	0.0598653	-0.0238265	0.161467	-0.147216	0.336212	0.223303	0.249965	-0.360459	0.275579	-0.0789474	-0.312281	0.114192
HP_ABNORMAL_RENAL_PHYSIOLOGY	0.0450237	-0.408801	0.254136	-0.408075	-0.493421	0.144382	0.000582024	-0.478443	-0.567073	0.00440529	-0.22162	-0.19084	-0.202597	-0.145857	-0.282271	-0.352529	-0.455817	-0.314431	-0.335979	0.300026	-0.181054	-0.185216	0.0115558	-0.137071	0.335792	-0.237489	0.0539931	0.0127967	-0.164055	0.316145	-0.307152	0.281006	0.199402	0.206335	0.416854	0.0651629	0.343059	0.0598653	-0.0238265	0.161467	-0.147216	0.336212	0.223303	0.249965	-0.360459	0.275579	-0.0789474	-0.312281	0.114192
HP_IRREGULAR_HYPERPIGMENTATION	-0.108536	-0.513893	0.358054	-0.32142	-0.515548	0.203919	0.173231	-0.345802	-0.554847	-0.27774	-0.299252	-0.190383	-0.218045	-0.241311	-0.358094	-0.302079	-0.50227	-0.377671	-0.246257	0.189518	-0.262673	-0.106718	-0.0987654	-0.0605891	0.257608	-0.399095	0.00180322	-0.139858	-0.232486	0.149123	-0.349467	0.204129	0.204577	0.198195	0.438996	0.157938	0.409651	0.134287	-0.0184107	0.293821	-0.00558214	0.476793	-0.00438597	0.267544	-0.508772	0.0583271	-0.00865801	-0.0855711	0.44998
HP_ABNORMAL_JOINT_MORPHOLOGY	-0.0727273	-0.228385	0.229149	-0.33796	-0.428151	0.12288	-0.00652783	-0.393134	-0.471768	-0.194365	-0.203389	-0.217225	-0.0944568	-0.115882	-0.27759	-0.336073	-0.490734	-0.396701	-0.0387571	0.0367424	-0.187984	-0.065348	-0.0792793	-0.312064	0.127105	-0.195337	0.0782513	-0.0224351	-0.071123	0.246764	-0.151232	-0.0145903	0.0967094	0.174504	0.333917	0.233766	0.330938	-0.0851459	-0.0343652	0.0994083	-0.000795978	0.284029	0.0677339	0.161107	-0.378898	0.0595414	-0.0723026	-0.152738	0.337092
HP_ABNORMALITY_OF_TOE	-0.0689847	-0.218787	0.183175	-0.375586	-0.417918	0.16783	-0.00316764	-0.376352	-0.4705	-0.190138	-0.204387	-0.19738	-0.0917839	-0.111867	-0.257542	-0.369807	-0.465623	-0.388062	-0.0792593	0.107843	-0.179619	0.0160299	-0.0838173	-0.305725	0.181016	-0.182447	0.158259	0.0621069	-0.0709457	0.292132	-0.158242	0.0593105	0.00134492	0.233762	0.375238	0.219038	0.31241	-0.0729236	-0.10933	0.0206037	-0.0050163	0.325433	0.149871	0.243339	-0.371981	0.146507	0.0381285	-0.135944	0.329494
HP_ABNORMALITY_OF_PELVIC_GIRDLE_BONE_MORPHOLOGY	-0.0689847	-0.218787	0.183175	-0.375586	-0.417918	0.16783	-0.00316764	-0.376352	-0.4705	-0.190138	-0.204387	-0.19738	-0.0917839	-0.111867	-0.257542	-0.369807	-0.465623	-0.388062	-0.0792593	0.107843	-0.179619	0.0160299	-0.0838173	-0.305725	0.181016	-0.182447	0.158259	0.0621069	-0.0709457	0.292132	-0.158242	0.0593105	0.00134492	0.233762	0.375238	0.219038	0.31241	-0.0729236	-0.10933	0.0206037	-0.0050163	0.325433	0.149871	0.243339	-0.371981	0.146507	0.0381285	-0.135944	0.329494
HP_ABNORMALITY_OF_THE_CURVATURE_OF_THE_VERTEBRAL_COLUMN	-0.0689847	-0.218787	0.183175	-0.375586	-0.417918	0.16783	-0.00316764	-0.376352	-0.4705	-0.190138	-0.204387	-0.19738	-0.0917839	-0.111867	-0.257542	-0.369807	-0.465623	-0.388062	-0.0792593	0.107843	-0.179619	0.0160299	-0.0838173	-0.305725	0.181016	-0.182447	0.158259	0.0621069	-0.0709457	0.292132	-0.158242	0.0593105	0.00134492	0.233762	0.375238	0.219038	0.31241	-0.0729236	-0.10933	0.0206037	-0.0050163	0.325433	0.149871	0.243339	-0.371981	0.146507	0.0381285	-0.135944	0.329494
HP_CRYPTORCHIDISM	-0.0765187	-0.301166	0.242045	-0.344239	-0.496503	0.221409	-0.00686333	-0.414848	-0.412891	-0.1728	-0.173958	-0.173313	-0.198908	-0.2425	-0.276136	-0.369386	-0.457762	-0.33016	-0.118547	0.0358974	-0.191321	-0.0665132	0.0066655	-0.256088	0.13645	-0.243629	0.147232	-0.0773057	-0.136094	0.259227	-0.214785	0.115977	-0.00701299	0.182159	0.412359	0.174121	0.413087	-0.00593301	-0.0302903	0.222173	-0.112687	0.34358	0.0710496	0.280383	-0.410886	-0.0314538	-0.137402	-0.178918	0.328449
HP_HYPOPIGMENTATION_OF_THE_SKIN	-0.00912779	-0.546115	0.348966	-0.396291	-0.56077	0.126038	0.0437264	-0.497502	-0.586051	-0.107266	-0.262658	-0.0899183	-0.214857	-0.188061	-0.272868	-0.449473	-0.452271	-0.34426	-0.374893	0.130246	-0.201724	-0.0120335	0.075168	-0.08278	0.370261	-0.374102	0.227521	-0.155393	-0.211614	0.243462	-0.277152	0.31648	0.213813	0.0216665	0.51199	0.141292	0.395311	0.145889	-0.222232	0.231975	-0.0723609	0.453747	0.0640517	0.284594	-0.33457	0.0568001	-0.126186	-0.353835	0.470993
HP_ABNORMAL_LOWER_LIMB_BONE_MORPHOLOGY	-0.0817308	-0.245192	0.22922	-0.349109	-0.44936	0.108587	-0.00946074	-0.404584	-0.47239	-0.158473	-0.205993	-0.232143	-0.10023	-0.115232	-0.284191	-0.300727	-0.497012	-0.393857	-0.0460373	-0.0105756	-0.109226	-0.0695971	-0.01066	-0.230495	0.0796703	-0.212819	0.083358	-0.0967221	-0.127361	0.256003	-0.141028	-0.00483631	0.10754	0.118975	0.363204	0.247561	0.349903	-0.0850484	-0.134793	0.106061	0.0935714	0.294931	-0.00856823	0.162482	-0.381056	0.0571429	-0.035401	-0.16222	0.479444
HP_ABNORMALITY_OF_THE_ABDOMINAL_WALL	0.0048829	-0.384833	0.244663	-0.403509	-0.46416	0.219917	0.0390287	-0.450531	-0.536149	-0.181419	-0.270748	-0.203125	-0.203113	-0.14451	-0.250259	-0.274189	-0.450067	-0.250797	-0.275531	0.227031	-0.225965	-0.174974	0.011615	-0.240132	0.330974	-0.140351	0.130347	-0.0900413	-0.18358	0.254066	-0.170516	0.0738689	0.162191	0.221997	0.421899	0.179814	0.375	0.072416	-0.00170676	0.1879	-0.147742	0.336212	0.137051	0.174089	-0.247624	0.153498	-0.129626	-0.226945	0.118381
HP_ABNORMAL_REFLEX	0.00219218	-0.408307	0.304825	-0.318009	-0.473975	0.137279	0.0664215	-0.363623	-0.484447	-0.182836	-0.289407	-0.0904255	-0.217143	-0.23539	-0.261414	-0.26417	-0.497012	-0.31203	-0.183345	0.185609	-0.300836	-0.176065	-0.153353	0.0985915	0.108617	-0.329439	0.0595238	0.00255102	-0.102525	0.11782	-0.309494	0.274471	0.150253	0.122043	0.258053	0.0327381	0.301418	0.204087	0.0562169	0.0975275	-0.121513	0.474296	0.0771302	0.00228833	-0.349078	0.165453	0.103145	-0.0801495	0.225634
HP_ABNORMAL_FINGER_PHALANX_MORPHOLOGY	-0.0857843	-0.320042	0.242177	-0.355519	-0.480042	0.200298	-0.00979772	-0.427648	-0.413697	-0.160455	-0.183516	-0.175624	-0.208104	-0.246071	-0.282682	-0.341489	-0.459586	-0.326628	-0.125965	-0.0123559	-0.111655	-0.0708128	0.0824623	-0.17239	0.0882897	-0.259404	0.155462	-0.158189	-0.171898	0.268789	-0.20881	0.138195	-0.00358196	0.135331	0.455811	0.188853	0.432498	-0.000467873	-0.128283	0.240255	-0.0235833	0.354419	-0.00652709	0.262081	-0.412846	-0.0341185	-0.110094	-0.175122	0.472285
HP_ABNORMALITY_OF_THE_LOWER_URINARY_TRACT	-0.0900643	-0.311675	0.0733208	-0.215361	-0.462332	0.17187	-0.0175439	-0.394481	-0.514751	-0.0325643	-0.206628	-0.247209	-0.218637	-0.140351	-0.330768	-0.369947	-0.40691	-0.307316	-0.1646	0.210751	-0.099216	0.0256208	0.0327553	-0.266984	0.269056	-0.329634	0.153757	0.0022669	-0.0616002	0.34571	-0.148803	0.20418	0.0770753	0.200775	0.397163	0.138186	0.338319	0.109322	-0.175916	0.0324643	0.0576267	0.335074	0.139659	0.152904	-0.364161	0.0629291	0.0288308	-0.385965	0.314455
HP_ABNORMAL_UMBILICUS_MORPHOLOGY	-0.00492611	-0.41993	0.277968	-0.421266	-0.497701	0.223629	0.0592128	-0.464368	-0.491514	-0.186506	-0.270894	-0.155172	-0.214857	-0.146632	-0.253829	-0.374181	-0.461055	-0.301336	-0.218172	0.173503	-0.280886	-0.112514	-0.0876068	-0.352245	0.362685	-0.156765	0.246623	-0.0861049	-0.186502	0.262985	-0.16312	0.00862069	0.193091	0.226044	0.427832	0.179544	0.400985	0.0718038	-0.104249	0.107878	-0.0770055	0.424403	0.146021	0.180915	-0.248768	0.151858	-0.0378681	-0.358157	0.255804
HP_ABNORMAL_CARDIAC_SEPTUM_MORPHOLOGY	-0.00492611	-0.41993	0.277968	-0.421266	-0.497701	0.223629	0.0592128	-0.464368	-0.491514	-0.186506	-0.270894	-0.155172	-0.214857	-0.146632	-0.253829	-0.374181	-0.461055	-0.301336	-0.218172	0.173503	-0.280886	-0.112514	-0.0876068	-0.352245	0.362685	-0.156765	0.246623	-0.0861049	-0.186502	0.262985	-0.16312	0.00862069	0.193091	0.226044	0.427832	0.179544	0.400985	0.0718038	-0.104249	0.107878	-0.0770055	0.424403	0.146021	0.180915	-0.248768	0.151858	-0.0378681	-0.358157	0.255804
HP_ABNORMAL_AORTIC_MORPHOLOGY	-0.00492611	-0.41993	0.277968	-0.421266	-0.497701	0.223629	0.0592128	-0.464368	-0.491514	-0.186506	-0.270894	-0.155172	-0.214857	-0.146632	-0.253829	-0.374181	-0.461055	-0.301336	-0.218172	0.173503	-0.280886	-0.112514	-0.0876068	-0.352245	0.362685	-0.156765	0.246623	-0.0861049	-0.186502	0.262985	-0.16312	0.00862069	0.193091	0.226044	0.427832	0.179544	0.400985	0.0718038	-0.104249	0.107878	-0.0770055	0.424403	0.146021	0.180915	-0.248768	0.151858	-0.0378681	-0.358157	0.255804
HP_ABNORMAL_CARDIAC_ATRIUM_MORPHOLOGY	-0.00492611	-0.41993	0.277968	-0.421266	-0.497701	0.223629	0.0592128	-0.464368	-0.491514	-0.186506	-0.270894	-0.155172	-0.214857	-0.146632	-0.253829	-0.374181	-0.461055	-0.301336	-0.218172	0.173503	-0.280886	-0.112514	-0.0876068	-0.352245	0.362685	-0.156765	0.246623	-0.0861049	-0.186502	0.262985	-0.16312	0.00862069	0.193091	0.226044	0.427832	0.179544	0.400985	0.0718038	-0.104249	0.107878	-0.0770055	0.424403	0.146021	0.180915	-0.248768	0.151858	-0.0378681	-0.358157	0.255804
HP_APLASIA_HYPOPLASIA_AFFECTING_THE_ANTERIOR_SEGMENT_OF_THE_EYE	-0.00492611	-0.41993	0.277968	-0.421266	-0.497701	0.223629	0.0592128	-0.464368	-0.491514	-0.186506	-0.270894	-0.155172	-0.214857	-0.146632	-0.253829	-0.374181	-0.461055	-0.301336	-0.218172	0.173503	-0.280886	-0.112514	-0.0876068	-0.352245	0.362685	-0.156765	0.246623	-0.0861049	-0.186502	0.262985	-0.16312	0.00862069	0.193091	0.226044	0.427832	0.179544	0.400985	0.0718038	-0.104249	0.107878	-0.0770055	0.424403	0.146021	0.180915	-0.248768	0.151858	-0.0378681	-0.358157	0.255804
HP_RENAL_HYPOPLASIA_APLASIA	-0.00492611	-0.41993	0.277968	-0.421266	-0.497701	0.223629	0.0592128	-0.464368	-0.491514	-0.186506	-0.270894	-0.155172	-0.214857	-0.146632	-0.253829	-0.374181	-0.461055	-0.301336	-0.218172	0.173503	-0.280886	-0.112514	-0.0876068	-0.352245	0.362685	-0.156765	0.246623	-0.0861049	-0.186502	0.262985	-0.16312	0.00862069	0.193091	0.226044	0.427832	0.179544	0.400985	0.0718038	-0.104249	0.107878	-0.0770055	0.424403	0.146021	0.180915	-0.248768	0.151858	-0.0378681	-0.358157	0.255804
HP_ABNORMAL_SYSTEMIC_ARTERIAL_MORPHOLOGY	-0.00492611	-0.41993	0.277968	-0.421266	-0.497701	0.223629	0.0592128	-0.464368	-0.491514	-0.186506	-0.270894	-0.155172	-0.214857	-0.146632	-0.253829	-0.374181	-0.461055	-0.301336	-0.218172	0.173503	-0.280886	-0.112514	-0.0876068	-0.352245	0.362685	-0.156765	0.246623	-0.0861049	-0.186502	0.262985	-0.16312	0.00862069	0.193091	0.226044	0.427832	0.179544	0.400985	0.0718038	-0.104249	0.107878	-0.0770055	0.424403	0.146021	0.180915	-0.248768	0.151858	-0.0378681	-0.358157	0.255804
HP_ABNORMALITY_OF_THE_CURVATURE_OF_THE_CORNEA	-0.00492611	-0.41993	0.277968	-0.421266	-0.497701	0.223629	0.0592128	-0.464368	-0.491514	-0.186506	-0.270894	-0.155172	-0.214857	-0.146632	-0.253829	-0.374181	-0.461055	-0.301336	-0.218172	0.173503	-0.280886	-0.112514	-0.0876068	-0.352245	0.362685	-0.156765	0.246623	-0.0861049	-0.186502	0.262985	-0.16312	0.00862069	0.193091	0.226044	0.427832	0.179544	0.400985	0.0718038	-0.104249	0.107878	-0.0770055	0.424403	0.146021	0.180915	-0.248768	0.151858	-0.0378681	-0.358157	0.255804
HP_HERNIA	-0.00492611	-0.41993	0.277968	-0.421266	-0.497701	0.223629	0.0592128	-0.464368	-0.491514	-0.186506	-0.270894	-0.155172	-0.214857	-0.146632	-0.253829	-0.374181	-0.461055	-0.301336	-0.218172	0.173503	-0.280886	-0.112514	-0.0876068	-0.352245	0.362685	-0.156765	0.246623	-0.0861049	-0.186502	0.262985	-0.16312	0.00862069	0.193091	0.226044	0.427832	0.179544	0.400985	0.0718038	-0.104249	0.107878	-0.0770055	0.424403	0.146021	0.180915	-0.248768	0.151858	-0.0378681	-0.358157	0.255804
HP_SLOPING_FOREHEAD	-0.0998232	-0.33702	0.0733536	-0.225464	-0.480748	0.12406	-0.0203258	-0.402978	-0.522028	-0.0283927	-0.220782	-0.262452	-0.229478	-0.139746	-0.341885	-0.341379	-0.409172	-0.304014	-0.172687	0.163445	-0.00860207	0.0227496	0.111119	-0.173817	0.222429	-0.35071	0.173215	-0.057956	-0.101232	0.358158	-0.139028	0.23511	0.073371	0.144542	0.441071	0.138374	0.349256	0.146888	-0.288489	0.0463259	0.156212	0.345359	0.0640517	0.156871	-0.365279	0.0616484	0.0345661	-0.37931	0.471641
HP_ABNORMAL_ESOPHAGUS_MORPHOLOGY	-0.00991843	-0.526241	0.356223	-0.340986	-0.513001	0.147937	0.0631627	-0.506644	-0.55071	-0.123688	-0.291262	-0.0882353	-0.216009	-0.141626	-0.295993	-0.452468	-0.462155	-0.296816	-0.369135	0.19051	-0.289655	-0.119312	-0.088172	-0.191773	0.369106	-0.36919	0.191535	-0.0854885	-0.141634	0.243462	-0.35468	0.238225	0.104321	0.221479	0.442616	0.139832	0.455613	0.140394	-0.0419828	0.250137	-0.16236	0.460048	0.150508	0.189278	-0.454277	0.0565277	-0.035982	-0.355657	0.322769
HP_ASTIGMATISM	-0.0126548	-0.456219	0.278638	-0.433442	-0.52209	0.210632	0.0563398	-0.476665	-0.494427	-0.173011	-0.286622	-0.171046	-0.225319	-0.146048	-0.260531	-0.345763	-0.467768	-0.298158	-0.226362	0.124388	-0.194732	-0.119459	-0.0103857	-0.279688	0.322273	-0.173272	0.257271	-0.163878	-0.245355	0.275887	-0.161978	0.0293785	0.221846	0.168931	0.469701	0.181282	0.421406	0.0739244	-0.220205	0.119189	0.0193086	0.439115	0.0696606	0.151714	-0.248375	0.15014	-0.0334976	-0.357896	0.419665
HP_TRIANGULAR_SHAPED_PHALANGES_OF_THE_HAND	-0.0126548	-0.456219	0.278638	-0.433442	-0.52209	0.210632	0.0563398	-0.476665	-0.494427	-0.173011	-0.286622	-0.171046	-0.225319	-0.146048	-0.260531	-0.345763	-0.467768	-0.298158	-0.226362	0.124388	-0.194732	-0.119459	-0.0103857	-0.279688	0.322273	-0.173272	0.257271	-0.163878	-0.245355	0.275887	-0.161978	0.0293785	0.221846	0.168931	0.469701	0.181282	0.421406	0.0739244	-0.220205	0.119189	0.0193086	0.439115	0.0696606	0.151714	-0.248375	0.15014	-0.0334976	-0.357896	0.419665
HP_DECREASED_FERTILITY	-0.0180381	-0.569837	0.356927	-0.35244	-0.52887	0.128588	0.0603094	-0.52068	-0.558358	-0.11062	-0.305345	-0.0899183	-0.226574	-0.141041	-0.306877	-0.426196	-0.468891	-0.293565	-0.382386	0.140633	-0.201223	-0.126593	-0.0105738	-0.0831055	0.326129	-0.392036	0.202474	-0.159713	-0.217148	0.255774	-0.367262	0.27218	0.11631	0.172962	0.491299	0.140183	0.475403	0.144917	-0.148923	0.26423	-0.0779839	0.474162	0.0732398	0.192635	-0.456275	0.0552338	-0.0311672	-0.355289	0.489744
HP_DOLICHOCEPHALY	-0.0180381	-0.569837	0.356927	-0.35244	-0.52887	0.128588	0.0603094	-0.52068	-0.558358	-0.11062	-0.305345	-0.0899183	-0.226574	-0.141041	-0.306877	-0.426196	-0.468891	-0.293565	-0.382386	0.140633	-0.201223	-0.126593	-0.0105738	-0.0831055	0.326129	-0.392036	0.202474	-0.159713	-0.217148	0.255774	-0.367262	0.27218	0.11631	0.172962	0.491299	0.140183	0.475403	0.144917	-0.148923	0.26423	-0.0779839	0.474162	0.0732398	0.192635	-0.456275	0.0552338	-0.0311672	-0.355289	0.489744
HP_HYPOPIGMENTED_SKIN_PATCHES	-0.0180381	-0.569837	0.356927	-0.35244	-0.52887	0.128588	0.0603094	-0.52068	-0.558358	-0.11062	-0.305345	-0.0899183	-0.226574	-0.141041	-0.306877	-0.426196	-0.468891	-0.293565	-0.382386	0.140633	-0.201223	-0.126593	-0.0105738	-0.0831055	0.326129	-0.392036	0.202474	-0.159713	-0.217148	0.255774	-0.367262	0.27218	0.11631	0.172962	0.491299	0.140183	0.475403	0.144917	-0.148923	0.26423	-0.0779839	0.474162	0.0732398	0.192635	-0.456275	0.0552338	-0.0311672	-0.355289	0.489744
HP_MYELODYSPLASIA	-0.0180381	-0.569837	0.356927	-0.35244	-0.52887	0.128588	0.0603094	-0.52068	-0.558358	-0.11062	-0.305345	-0.0899183	-0.226574	-0.141041	-0.306877	-0.426196	-0.468891	-0.293565	-0.382386	0.140633	-0.201223	-0.126593	-0.0105738	-0.0831055	0.326129	-0.392036	0.202474	-0.159713	-0.217148	0.255774	-0.367262	0.27218	0.11631	0.172962	0.491299	0.140183	0.475403	0.144917	-0.148923	0.26423	-0.0779839	0.474162	0.0732398	0.192635	-0.456275	0.0552338	-0.0311672	-0.355289	0.489744
HP_DECREASED_FERTILITY_IN_MALES	-0.0180381	-0.569837	0.356927	-0.35244	-0.52887	0.128588	0.0603094	-0.52068	-0.558358	-0.11062	-0.305345	-0.0899183	-0.226574	-0.141041	-0.306877	-0.426196	-0.468891	-0.293565	-0.382386	0.140633	-0.201223	-0.126593	-0.0105738	-0.0831055	0.326129	-0.392036	0.202474	-0.159713	-0.217148	0.255774	-0.367262	0.27218	0.11631	0.172962	0.491299	0.140183	0.475403	0.144917	-0.148923	0.26423	-0.0779839	0.474162	0.0732398	0.192635	-0.456275	0.0552338	-0.0311672	-0.355289	0.489744
HP_ABNORMALITY_OF_THE_LENS	0.00501253	-0.346537	0.339095	-0.347527	-0.445202	0.123342	0.0708798	-0.399049	-0.479286	-0.272975	-0.20399	-0.127871	-0.0974686	-0.119898	-0.237685	-0.34188	-0.491708	-0.393106	-0.189177	0.105318	-0.29494	-0.096397	-0.16978	-0.228379	0.212045	-0.149409	0.0811224	-0.125296	-0.166241	0.194921	-0.167307	-0.00625921	0.152027	0.185278	0.338435	0.25085	0.337107	-0.0819635	0.00232223	0.134902	-0.0636269	0.371631	0.0714286	0.165179	-0.378111	0.154268	-0.0811404	-0.0658704	0.28544
HP_OCULAR_ANTERIOR_SEGMENT_DYSGENESIS	0.00501253	-0.346537	0.339095	-0.347527	-0.445202	0.123342	0.0708798	-0.399049	-0.479286	-0.272975	-0.20399	-0.127871	-0.0974686	-0.119898	-0.237685	-0.34188	-0.491708	-0.393106	-0.189177	0.105318	-0.29494	-0.096397	-0.16978	-0.228379	0.212045	-0.149409	0.0811224	-0.125296	-0.166241	0.194921	-0.167307	-0.00625921	0.152027	0.185278	0.338435	0.25085	0.337107	-0.0819635	0.00232223	0.134902	-0.0636269	0.371631	0.0714286	0.165179	-0.378111	0.154268	-0.0811404	-0.0658704	0.28544
HP_FUNCTIONAL_ABNORMALITY_OF_MALE_INTERNAL_GENITALIA	0.00110457	-0.466913	0.355617	-0.293367	-0.464838	0.141626	0.0708798	-0.387594	-0.488636	-0.188708	-0.272541	-0.0875332	-0.210298	-0.235863	-0.266225	-0.267103	-0.489615	-0.298512	-0.298798	0.0999389	-0.309524	-0.176648	-0.157346	0.0456254	0.209133	-0.33166	0.0791808	-0.181322	-0.182001	0.153106	-0.341407	0.261197	0.0915934	0.134548	0.365102	0.138593	0.375908	0.120545	0.0543776	0.235363	-0.148064	0.468302	0.0761485	0.138889	-0.426282	0.0598812	0.0288042	-0.0792857	0.278475
HP_ABNORMAL_MALE_REPRODUCTIVE_SYSTEM_PHYSIOLOGY	0.00110457	-0.466913	0.355617	-0.293367	-0.464838	0.141626	0.0708798	-0.387594	-0.488636	-0.188708	-0.272541	-0.0875332	-0.210298	-0.235863	-0.266225	-0.267103	-0.489615	-0.298512	-0.298798	0.0999389	-0.309524	-0.176648	-0.157346	0.0456254	0.209133	-0.33166	0.0791808	-0.181322	-0.182001	0.153106	-0.341407	0.261197	0.0915934	0.134548	0.365102	0.138593	0.375908	0.120545	0.0543776	0.235363	-0.148064	0.468302	0.0761485	0.138889	-0.426282	0.0598812	0.0288042	-0.0792857	0.278475
HP_NEUROLOGICAL_SPEECH_IMPAIRMENT	-0.193152	0.0858055	0.223881	0.134328	0.457883	0.212911	0.486376	0.694527	-0.0785754	0.219858	0.368507	-0.0138266	0.29626	0.539566	0.0639177	0.514161	0.554152	0.453327	0.65583	0.0997042	-0.432836	0.33979	-0.621576	0.0277778	-0.209865	0.104538	0.0248756	-0.0266525	-0.245075	-0.472441	0.0129193	-0.0364389	-0.105247	-0.616879	-0.170793	0.1866	-0.485797	0.0522388	-0.25848	-0.415871	-0.0727612	0.547678	0.337979	-0.350651	0.20348	0.300157	-0.000850669	0.0128643	-0.40213
HP_ABNORMALITY_OF_GLOBE_LOCATION	-0.00250627	-0.376704	0.339572	-0.358604	-0.467062	0.111421	0.0678473	-0.410369	-0.480073	-0.236202	-0.206918	-0.143567	-0.10341	-0.119271	-0.243807	-0.301747	-0.497952	-0.390174	-0.197571	0.0518239	-0.218468	-0.102882	-0.101833	-0.135928	0.166541	-0.166724	0.0863158	-0.221011	-0.231079	0.201991	-0.165926	0.00406329	0.178947	0.129518	0.367419	0.259552	0.355856	-0.0937322	-0.0863276	0.14775	0.0389864	0.386347	-0.00552752	0.161813	-0.380372	0.152364	-0.0421291	-0.0749601	0.433812
HP_ABNORMAL_PERIPHERAL_NERVOUS_SYSTEM_MORPHOLOGY	0.178483	0.00595238	0.184197	0.117647	0.63024	0.191099	0.473174	0.734057	0.250684	0.32532	0.0707101	0.0673529	0.242437	0.181851	0.18808	0.659502	0.491248	0.229961	0.361121	0.387503	-0.312144	0.33437	-0.263199	0.355499	-0.260614	0.207721	-0.604711	0.0505279	-0.407444	-0.327355	-0.375121	0.17885	-0.226303	-0.456028	0.117081	0.233584	-0.561402	-0.0406885	0.090405	-0.0897542	0.0641564	0.422108	0.303329	0.0624546	-0.15493	0.19618	-0.390128	0.172989	-0.676799
HP_ABNORMALITY_OF_SKIN_PIGMENTATION	-0.0946843	-0.43286	0.245952	-0.222808	-0.503716	0.198526	0.168322	-0.228023	-0.560836	-0.272119	-0.158289	-0.187264	-0.204567	-0.240806	-0.318593	-0.275728	-0.423864	-0.371033	-0.248123	0.21342	-0.167563	0.10315	0.0111111	0.0235884	0.297146	-0.35853	0.0158358	-0.111309	-0.249462	0.185172	-0.190612	0.306925	0.265762	0.048394	0.414146	0.199366	0.242437	0.14206	-0.196846	0.211845	0.0802233	0.472727	0.0125663	0.333039	-0.37525	0.0615914	-0.10974	-0.116017	0.408245
HP_ABNORMALITY_OF_THE_CHOANAE	-0.0176101	-0.466765	0.174591	-0.234161	-0.499339	0.12806	0.0587152	-0.406548	-0.543513	-0.111578	-0.229854	-0.175468	-0.235062	-0.146751	-0.305712	-0.347195	-0.408702	-0.300469	-0.318834	0.187845	-0.10884	-0.00896614	0.0241758	-0.0628372	0.333993	-0.304193	0.178008	-0.150375	-0.222012	0.316482	-0.1757	0.263498	0.187622	0.155734	0.444059	0.141166	0.351301	0.148011	-0.245914	0.0861773	0.115984	0.448552	0.0692235	0.156653	-0.363772	0.167193	0.0405675	-0.355932	0.4228
HP_ABNORMAL_THROMBOCYTE_MORPHOLOGY	-0.0176101	-0.466765	0.174591	-0.234161	-0.499339	0.12806	0.0587152	-0.406548	-0.543513	-0.111578	-0.229854	-0.175468	-0.235062	-0.146751	-0.305712	-0.347195	-0.408702	-0.300469	-0.318834	0.187845	-0.10884	-0.00896614	0.0241758	-0.0628372	0.333993	-0.304193	0.178008	-0.150375	-0.222012	0.316482	-0.1757	0.263498	0.187622	0.155734	0.444059	0.141166	0.351301	0.148011	-0.245914	0.0861773	0.115984	0.448552	0.0692235	0.156653	-0.363772	0.167193	0.0405675	-0.355932	0.4228
HP_ABNORMAL_ERYTHROCYTE_MORPHOLOGY	-0.0176101	-0.466765	0.174591	-0.234161	-0.499339	0.12806	0.0587152	-0.406548	-0.543513	-0.111578	-0.229854	-0.175468	-0.235062	-0.146751	-0.305712	-0.347195	-0.408702	-0.300469	-0.318834	0.187845	-0.10884	-0.00896614	0.0241758	-0.0628372	0.333993	-0.304193	0.178008	-0.150375	-0.222012	0.316482	-0.1757	0.263498	0.187622	0.155734	0.444059	0.141166	0.351301	0.148011	-0.245914	0.0861773	0.115984	0.448552	0.0692235	0.156653	-0.363772	0.167193	0.0405675	-0.355932	0.4228
HP_ANAL_ATRESIA	-0.0176101	-0.466765	0.174591	-0.234161	-0.499339	0.12806	0.0587152	-0.406548	-0.543513	-0.111578	-0.229854	-0.175468	-0.235062	-0.146751	-0.305712	-0.347195	-0.408702	-0.300469	-0.318834	0.187845	-0.10884	-0.00896614	0.0241758	-0.0628372	0.333993	-0.304193	0.178008	-0.150375	-0.222012	0.316482	-0.1757	0.263498	0.187622	0.155734	0.444059	0.141166	0.351301	0.148011	-0.245914	0.0861773	0.115984	0.448552	0.0692235	0.156653	-0.363772	0.167193	0.0405675	-0.355932	0.4228
HP_ABNORMALITY_OF_THE_ANUS	-0.0176101	-0.466765	0.174591	-0.234161	-0.499339	0.12806	0.0587152	-0.406548	-0.543513	-0.111578	-0.229854	-0.175468	-0.235062	-0.146751	-0.305712	-0.347195	-0.408702	-0.300469	-0.318834	0.187845	-0.10884	-0.00896614	0.0241758	-0.0628372	0.333993	-0.304193	0.178008	-0.150375	-0.222012	0.316482	-0.1757	0.263498	0.187622	0.155734	0.444059	0.141166	0.351301	0.148011	-0.245914	0.0861773	0.115984	0.448552	0.0692235	0.156653	-0.363772	0.167193	0.0405675	-0.355932	0.4228
HP_APLASIA_HYPOPLASIA_OF_THE_RADIUS	-0.091656	-0.361485	0.165733	-0.337651	-0.419389	0.124303	-0.0188871	-0.47759	-0.434933	-0.0299747	-0.308487	-0.17147	-0.225027	-0.138831	-0.193036	-0.305984	-0.480391	-0.353623	-0.176932	0.196534	-0.0882944	-0.0831082	0.0825999	-0.25166	0.212178	-0.272092	0.0554584	-0.0551298	-0.100269	0.325111	-0.307907	0.202558	-0.00348933	0.156189	0.516816	0.236795	0.361404	0.14629	-0.220518	0.000424403	0.131211	0.391379	0.0904855	0.156507	-0.261357	0.0614088	-0.00470219	-0.447191	0.331701
HP_APLASIA_HYPOPLASIA_INVOLVING_FOREARM_BONES	-0.091656	-0.361485	0.165733	-0.337651	-0.419389	0.124303	-0.0188871	-0.47759	-0.434933	-0.0299747	-0.308487	-0.17147	-0.225027	-0.138831	-0.193036	-0.305984	-0.480391	-0.353623	-0.176932	0.196534	-0.0882944	-0.0831082	0.0825999	-0.25166	0.212178	-0.272092	0.0554584	-0.0551298	-0.100269	0.325111	-0.307907	0.202558	-0.00348933	0.156189	0.516816	0.236795	0.361404	0.14629	-0.220518	0.000424403	0.131211	0.391379	0.0904855	0.156507	-0.261357	0.0614088	-0.00470219	-0.447191	0.331701
HP_CLINICAL_COURSE	0.0182495	0.0756083	0.340578	0.231618	0.651722	0.0651938	0.605646	0.701692	0.00312891	0.182308	0.362326	0.05	0.368268	0.213374	0.10817	0.473927	0.437122	0.0545795	0.497291	0.330379	-0.552956	0.308824	-0.583406	0.220736	-0.24831	0.184842	-0.465152	0.159534	-0.203676	-0.329362	-0.296421	0.151961	-0.223289	-0.487432	-0.0526565	0.23451	-0.556614	-0.209632	0.0384223	-0.32727	0.00421304	0.606952	0.300715	-0.0535234	-0.263635	0.443252	-0.294858	0.07405	-0.555739
HP_EPICANTHUS	-0.00382154	-0.462609	0.275939	-0.335998	-0.415634	0.147569	0.0624895	-0.470918	-0.443956	-0.113099	-0.298259	-0.0795756	-0.219534	-0.146284	-0.144616	-0.343076	-0.474559	-0.351832	-0.31299	0.266048	-0.284212	-0.116647	-0.0868644	-0.249812	0.362532	-0.202837	0.0532064	-0.0806209	-0.163168	0.268442	-0.347316	0.196025	0.0831067	0.225022	0.48074	0.241547	0.352283	0.139389	-0.053479	0.0190965	-0.0449477	0.503288	0.165758	0.152299	-0.259822	0.170676	-0.0205771	-0.37931	0.128741
HP_ABNORMALITY_OF_THE_ULNA	-0.00382154	-0.462609	0.275939	-0.335998	-0.415634	0.147569	0.0624895	-0.470918	-0.443956	-0.113099	-0.298259	-0.0795756	-0.219534	-0.146284	-0.144616	-0.343076	-0.474559	-0.351832	-0.31299	0.266048	-0.284212	-0.116647	-0.0868644	-0.249812	0.362532	-0.202837	0.0532064	-0.0806209	-0.163168	0.268442	-0.347316	0.196025	0.0831067	0.225022	0.48074	0.241547	0.352283	0.139389	-0.053479	0.0190965	-0.0449477	0.503288	0.165758	0.152299	-0.259822	0.170676	-0.0205771	-0.37931	0.128741
HP_FINGER_SYNDACTYLY	-0.0114656	-0.506591	0.276581	-0.347342	-0.434902	0.128324	0.0596328	-0.483369	-0.447337	-0.107635	-0.31761	-0.0810811	-0.230419	-0.1457	-0.152189	-0.310695	-0.48156	-0.354587	-0.326689	0.221667	-0.197189	-0.123795	-0.0101389	-0.161926	0.319595	-0.215496	0.0586671	-0.149404	-0.220164	0.281513	-0.359689	0.237577	0.0952144	0.167955	0.522592	0.243162	0.36345	0.145719	-0.172947	0.0228373	0.0583548	0.516552	0.0986789	0.156286	-0.259644	0.170145	-0.00945714	-0.38821	0.274953
HP_APLASIA_HYPOPLASIA_OF_FINGERS	-0.0114656	-0.506591	0.276581	-0.347342	-0.434902	0.128324	0.0596328	-0.483369	-0.447337	-0.107635	-0.31761	-0.0810811	-0.230419	-0.1457	-0.152189	-0.310695	-0.48156	-0.354587	-0.326689	0.221667	-0.197189	-0.123795	-0.0101389	-0.161926	0.319595	-0.215496	0.0586671	-0.149404	-0.220164	0.281513	-0.359689	0.237577	0.0952144	0.167955	0.522592	0.243162	0.36345	0.145719	-0.172947	0.0228373	0.0583548	0.516552	0.0986789	0.156286	-0.259644	0.170145	-0.00945714	-0.38821	0.274953
HP_ABNORMAL_CRANIAL_NERVE_PHYSIOLOGY	-0.0114656	-0.506591	0.276581	-0.347342	-0.434902	0.128324	0.0596328	-0.483369	-0.447337	-0.107635	-0.31761	-0.0810811	-0.230419	-0.1457	-0.152189	-0.310695	-0.48156	-0.354587	-0.326689	0.221667	-0.197189	-0.123795	-0.0101389	-0.161926	0.319595	-0.215496	0.0586671	-0.149404	-0.220164	0.281513	-0.359689	0.237577	0.0952144	0.167955	0.522592	0.243162	0.36345	0.145719	-0.172947	0.0228373	0.0583548	0.516552	0.0986789	0.156286	-0.259644	0.170145	-0.00945714	-0.38821	0.274953
HP_ABNORMALITY_OF_THE_UTERUS	0.000721732	-0.390805	0.280035	-0.37451	-0.449123	0.288239	0.170201	-0.303916	-0.569075	-0.196645	-0.316766	-0.337282	-0.226914	-0.140055	-0.362925	-0.286401	-0.463259	-0.240045	-0.161649	0.215107	-0.266055	-0.107561	-0.102128	-0.139134	0.367633	-0.252991	0.121401	-0.09896	-0.253344	0.279593	-0.28654	0.165025	0.284351	0.205364	0.422762	0.140492	0.237635	0.243455	-0.123342	0.0122358	0.0876588	0.491766	0.0703448	0.15096	-0.350234	0.214004	0.0735027	-0.294707	0.412395
HP_ABNORMAL_UTERUS_MORPHOLOGY	0.000721732	-0.390805	0.280035	-0.37451	-0.449123	0.288239	0.170201	-0.303916	-0.569075	-0.196645	-0.316766	-0.337282	-0.226914	-0.140055	-0.362925	-0.286401	-0.463259	-0.240045	-0.161649	0.215107	-0.266055	-0.107561	-0.102128	-0.139134	0.367633	-0.252991	0.121401	-0.09896	-0.253344	0.279593	-0.28654	0.165025	0.284351	0.205364	0.422762	0.140492	0.237635	0.243455	-0.123342	0.0122358	0.0876588	0.491766	0.0703448	0.15096	-0.350234	0.214004	0.0735027	-0.294707	0.412395
HP_ABNORMALITY_OF_THE_CEREBRAL_VENTRICLES	-0.00912779	-0.431034	0.302174	-0.406199	-0.515534	0.204011	0.0594545	-0.436325	-0.486268	-0.158691	-0.275142	-0.0899471	-0.221944	-0.139134	-0.252339	-0.379388	-0.446614	-0.236586	-0.107027	0.199234	-0.190935	-0.112514	-0.00895949	-0.141827	0.185616	-0.236878	0.249842	-0.0381281	-0.124508	0.179181	-0.162684	0.115862	0.199082	0.141114	0.324643	0.0696116	0.378785	0.166122	-0.215923	0.0958188	-0.0431732	0.470843	0.0670352	0.0409256	-0.25015	0.15138	-0.0335204	-0.352058	0.40783
HP_VENTRICULOMEGALY	-0.00912779	-0.431034	0.302174	-0.406199	-0.515534	0.204011	0.0594545	-0.436325	-0.486268	-0.158691	-0.275142	-0.0899471	-0.221944	-0.139134	-0.252339	-0.379388	-0.446614	-0.236586	-0.107027	0.199234	-0.190935	-0.112514	-0.00895949	-0.141827	0.185616	-0.236878	0.249842	-0.0381281	-0.124508	0.179181	-0.162684	0.115862	0.199082	0.141114	0.324643	0.0696116	0.378785	0.166122	-0.215923	0.0958188	-0.0431732	0.470843	0.0670352	0.0409256	-0.25015	0.15138	-0.0335204	-0.352058	0.40783
HP_ABNORMAL_SPERMATOGENESIS	-0.0115255	-0.537151	0.354987	-0.316827	-0.491438	0.127312	0.0642633	-0.418774	-0.534483	-0.109741	-0.29703	-0.0894309	-0.222555	-0.13734	-0.297112	-0.266543	-0.455151	-0.218028	-0.32626	0.100958	-0.200978	-0.193886	-0.0901288	0.0486118	0.277632	-0.388097	0.195458	-0.224036	-0.212185	0.19962	-0.362929	0.242334	0.108493	0.092773	0.436825	0.139462	0.406552	0.229405	-0.162379	0.212347	-0.0723609	0.501213	0.0674701	0.0622458	-0.357528	0.0567704	0.0675381	-0.278556	0.463105
GOBP_MITOTIC_DNA_INTEGRITY_CHECKPOINT	-0.0288267	0.237865	0.216239	0.393074	0.338745	-0.186067	-0.12906	0.301969	0.265296	0.430004	0.471329	0.37346	-0.00937947	0.173244	0.0518323	0.421474	0.426446	0.400576	0.154898	0.0179487	0.0927161	0.104201	0.157952	0.145539	-0.388917	-0.410492	-0.0390337	0.360298	0.325112	-0.400188	0.0287035	-0.0320611	-0.236947	-0.116206	-0.502371	-0.232226	-0.0663764	0.105417	-0.188889	-0.0929439	-0.0111602	-0.0971969	-0.282418	-0.132749	-0.196656	-0.374577	-0.0358974	0.0540127	-0.0629752
HP_ABNORMAL_VASCULAR_MORPHOLOGY	0.000401768	-0.37193	0.337841	-0.360219	-0.450028	0.12644	0.0672026	-0.43209	-0.54139	-0.219821	-0.202548	-0.135462	-0.0990032	-0.0147506	-0.250995	-0.376858	-0.451968	-0.305443	-0.195724	0.167366	-0.277968	-0.104304	-0.17367	-0.348784	0.33193	-0.176374	0.172796	-0.0903432	-0.097722	0.211501	-0.165103	-0.0782244	0.164002	0.200775	0.357272	0.260873	0.353998	-0.00716076	-0.101037	0.0961307	-0.0705722	0.390881	0.136025	0.101591	-0.304809	0.153498	-0.0350478	-0.234808	0.309847
HP_ABNORMAL_MORPHOLOGY_OF_THE_GREAT_VESSELS	0.000401768	-0.37193	0.337841	-0.360219	-0.450028	0.12644	0.0672026	-0.43209	-0.54139	-0.219821	-0.202548	-0.135462	-0.0990032	-0.0147506	-0.250995	-0.376858	-0.451968	-0.305443	-0.195724	0.167366	-0.277968	-0.104304	-0.17367	-0.348784	0.33193	-0.176374	0.172796	-0.0903432	-0.097722	0.211501	-0.165103	-0.0782244	0.164002	0.200775	0.357272	0.260873	0.353998	-0.00716076	-0.101037	0.0961307	-0.0705722	0.390881	0.136025	0.101591	-0.304809	0.153498	-0.0350478	-0.234808	0.309847
HP_HYPERTELORISM	-0.0071877	-0.403961	0.338362	-0.371301	-0.471849	0.113075	0.0642633	-0.443889	-0.543997	-0.1802	-0.205586	-0.150994	-0.104997	-0.0144481	-0.257623	-0.348856	-0.457091	-0.302117	-0.20363	0.120036	-0.192569	-0.111004	-0.104822	-0.279849	0.289976	-0.195217	0.186736	-0.166812	-0.163813	0.220333	-0.163838	-0.0706243	0.191123	0.144542	0.387783	0.263278	0.372963	-0.013907	-0.216762	0.102113	0.0237779	0.405172	0.0611709	0.0918311	-0.306864	0.151697	-0.0337508	-0.232291	0.466603
HP_TOE_SYNDACTYLY	-0.0071877	-0.403961	0.338362	-0.371301	-0.471849	0.113075	0.0642633	-0.443889	-0.543997	-0.1802	-0.205586	-0.150994	-0.104997	-0.0144481	-0.257623	-0.348856	-0.457091	-0.302117	-0.20363	0.120036	-0.192569	-0.111004	-0.104822	-0.279849	0.289976	-0.195217	0.186736	-0.166812	-0.163813	0.220333	-0.163838	-0.0706243	0.191123	0.144542	0.387783	0.263278	0.372963	-0.013907	-0.216762	0.102113	0.0237779	0.405172	0.0611709	0.0918311	-0.306864	0.151697	-0.0337508	-0.232291	0.466603
HP_RECURRENT_URINARY_TRACT_INFECTIONS	-0.00710221	-0.463328	0.249419	-0.184815	-0.461656	0.144737	0.0691097	-0.397866	-0.525477	-0.119756	-0.162057	-0.0861619	-0.213414	-0.14066	-0.287594	-0.410458	-0.389324	-0.24034	-0.346667	0.226157	-0.1995	0.000584795	-0.0544291	-0.0904694	0.364778	-0.342105	0.175923	-0.0911197	-0.14213	0.272973	-0.23783	0.287018	0.0599328	0.198565	0.39459	0.140856	0.39357	0.145857	-0.144165	0.192827	-0.0659776	0.458772	0.141253	0.181818	-0.451218	0.0581562	-0.0312067	-0.351703	0.302011
GOMF_ENDODEOXYRIBONUCLEASE_ACTIVITY	0.282428	0.0804739	0.289775	-0.0588235	0.0882353	-0.335473	0.315015	0.34142	0.20029	0.457806	0.124877	0.485294	0.453431	0.182108	0.36494	0.564706	0.571078	-0.00287545	0.430978	0.170854	-0.378936	0.193392	-0.364846	0.10318	-0.565793	0.0456656	-0.185294	0.219882	-0.426471	0.13765	-0.051382	0.161765	0.218703	-0.647059	-0.0733351	-0.36067	-0.161925	-0.426601	0.132646	0.526879	0.236962	0.215436	-0.181689	-0.315723	-0.0147059	0.158048	-0.548579	0.27517	-0.0453604
HP_UPSLANTED_PALPEBRAL_FISSURE	-0.0119327	-0.412734	0.236529	-0.189655	-0.394998	0.0307018	0.0663874	-0.382857	-0.577286	-0.12069	-0.18756	-0.155172	-0.110125	-0.0144324	-0.300507	-0.350279	-0.402974	-0.304423	-0.281577	0.183076	-0.107877	-0.00318422	-0.0720081	-0.0633289	0.302708	-0.324353	0.1079	-0.14644	-0.141313	0.26218	-0.177301	0.139916	0.136143	0.132845	0.369154	0.23157	0.321215	0.0474983	-0.246181	0.07	0.118112	0.414735	0.0607674	0.0933908	-0.419512	0.167359	0.0387931	-0.231801	0.469664
GOBP_REGULATION_OF_TELOMERE_MAINTENANCE	-0.000980392	0.422269	-0.319874	0.209397	0.19195	-0.146883	0.260662	0.536122	0.147059	0.318295	0.493464	0.349286	0.220588	0.0832875	0.137625	0.647776	0.583588	0.278824	0.661886	-0.235901	-0.205882	0.261267	-0.285596	0.258109	-0.738796	0.0628959	-0.10388	-0.0641085	-0.159521	-0.0152971	0.30805	0.18297	-0.0748577	-0.661765	-0.099488	-0.135413	-0.342006	-0.124295	-0.14886	0.135068	0.199142	0.188311	-0.297059	-0.539216	0.236928	-0.203047	-0.25112	0.0775939	0.171373
[truncated: 256 more columns]

## Sheet: Sheet3
Data3. FARGs expression matrix extracted from TCGA
id	ATM	ATR	ATRIP	BACH1	BLM	BRCA1	BRCA2	BRIP1	CENPS	CENPX	CHEK1	CLK2	DCLRE1A	DCLRE1B	EME1	EME2	ERCC1	ERCC4	FAAP100	FAAP20	FAAP24	FAH	FAN1	FANCA	FANCB	FANCC	FANCD2	FANCE	FANCF	FANCG	FANCI	FANCL	FANCM	FBXW11	HES1	HUS1	MLH1	MRE11	MUS81	NBN	PALB2	PMS2	PMS2CL	POLH	POLI	POLK	POLN	RAD1	RAD17
TCGA-2W-A8YY-01	1.62364	1.86557	0.0885571	2.347	2.34234	2.6285	1.56355	1.7486	2.34239	6.07544	3.1409	4.48031	2.60122	2.94323	2.49187	1.43721	3.42053	1.27353	3.5308	2.37733	2.3241	2.6086	2.40759	2.53381	0.922365	2.37253	2.4069	3.15922	1.90889	4.26503	4.09147	3.08908	1.20628	3.46008	4.38828	2.33542	1.38895	2.54749	2.8899	3.21872	2.57717	2.3872	1.76723	2.52987	1.74157	1.15886	0.162578	2.78572	3.49673
TCGA-4J-AA1J-01	1.24317	2.00467	0.137574	3.91239	2.13799	2.73431	2.24267	3.27336	1.87182	3.68402	2.4771	4.1447	2.45332	2.68858	1.86651	1.90645	3.25201	1.46393	2.2227	1.94031	2.15176	2.7867	2.33215	2.40068	1.18883	2.18764	2.9116	4.12141	1.50797	3.63612	3.82064	3.78632	1.74774	2.9274	5.45162	2.44368	4.02066	3.42158	3.51	3.61888	3.13368	2.0343	1.48552	2.89392	1.97984	1.60613	0.204961	3.21507	2.54311
TCGA-BI-A0VR-01	1.12268	2.69077	0.0776495	3.18364	1.98524	2.1913	1.07992	1.7825	2.37621	4.94177	2.63547	4.00876	2.06619	2.85626	1.60645	1.25926	3.12711	0.88089	2.93617	1.89295	2.00785	2.24631	2.05327	2.20825	1.65453	2.13992	2.03302	4.17323	1.25817	3.71213	4.09415	3.49764	1.09115	3.40487	6.98012	2.4339	3.39396	2.23092	2.96505	3.61649	2.89202	1.51196	1.35265	2.63318	0.850073	1.57892	0.0673025	2.66558	2.79493
TCGA-BI-A0VS-01	1.19306	2.46701	0.169982	2.7964	1.89209	1.72295	0.798108	1.9004	1.40681	4.08921	2.20292	3.70988	2.28523	2.36544	1.57837	1.02564	3.35671	1.4198	3.09279	2.06697	2.2517	1.38228	1.84901	2.27452	1.23091	1.76322	2.41952	4.14971	1.50411	3.41688	3.07843	2.69452	1.48034	3.21943	3.93534	2.29547	3.41047	2.57011	2.75581	4.02976	2.97139	2.00778	1.05916	3.1157	1.43274	1.19835	0.0962538	3.18899	2.88182
TCGA-BI-A20A-01	1.01469	2.60753	0.0349458	2.38467	2.23908	3.14497	1.48044	2.481	2.67724	5.9171	2.32945	4.02816	2.26497	2.79363	2.06056	1.10276	3.38945	0.618519	3.51257	2.4084	2.24873	3.1916	2.2116	1.86914	1.72181	2.1806	2.05296	3.73925	2.5395	3.68597	4.24419	4.23521	1.0208	3.28677	6.1796	2.53667	3.03033	2.75249	3.02422	3.57633	2.5182	1.93213	1.27773	3.15561	1.08662	1.71939	0.251653	2.59408	2.9095
TCGA-C5-A0TN-01	3.03906	1.6075	0.0556343	2.91068	2.18002	2.20595	1.60404	2.03378	1.7275	4.40054	2.45608	3.73447	1.50727	2.67947	2.1937	1.63942	4.67281	1.23617	3.24227	2.14218	2.98263	3.04497	1.68006	1.97225	1.22148	2.13447	1.63429	3.31307	2.80794	3.63237	3.68924	3.67419	1.15242	2.27585	5.6245	3.37032	2.94113	3.32741	2.6235	3.74029	2.47767	2.176	1.34982	2.58764	1.5648	1.24053	0.257295	3.05991	1.86063
TCGA-C5-A1BE-01	0.907481	1.68078	0.140157	3.23049	1.72142	2.17217	0.831468	2.29596	2.04885	5.31929	2.33999	3.86918	2.60058	2.52944	1.68906	1.6114	2.86308	1.03591	3.15838	1.97706	2.10469	1.10016	2.01144	2.46239	0.938808	2.33018	2.03176	4.84476	2.36735	3.79563	3.79218	3.77837	1.2207	3.5262	6.2375	2.4918	4.13525	1.70725	3.02747	3.417	3.35539	1.22176	1.52508	2.9415	1.07954	1.07715	0.114505	2.66102	2.4319
TCGA-C5-A1BF-01	0.882002	1.4807	0.0321989	3.36652	1.06116	1.6829	0.712692	1.37477	1.60928	4.11169	2.02519	3.96899	2.3128	1.93604	1.32109	1.03095	3.77026	1.01893	3.12735	2.22894	1.58507	1.99077	1.75852	1.76248	0.50244	1.68524	1.30624	2.89882	2.30282	3.26038	2.96561	3.50476	0.797046	3.9123	4.23441	2.11526	2.73518	1.57662	2.91944	3.27078	2.20209	1.83877	1.20873	2.2581	1.35188	1.53316	0.0388408	2.17238	2.50557
TCGA-C5-A1BI-01	1.50038	2.21631	0.112184	3.76447	2.03209	2.9873	1.78745	2.32498	2.3492	4.5453	3.09457	4.05534	2.29419	2.98958	1.86375	1.59424	2.99939	1.12373	3.07866	1.5466	2.30968	1.13802	1.97347	1.99828	1.14563	1.8347	1.81092	3.6359	1.6137	4.04475	4.11778	3.55846	1.47727	3.6215	5.69185	2.34474	3.22328	2.80196	2.72072	3.24734	2.93315	1.83651	1.00352	2.97986	1.41491	1.61545	0.0676549	2.78358	2.97411
TCGA-C5-A1BJ-01	1.37041	2.58538	0.117185	3.21003	2.02011	2.62031	1.11083	2.28452	2.30619	4.44811	2.49828	4.48588	2.65625	2.8203	2.69257	1.73727	3.30642	1.25038	3.15882	2.01539	2.68212	2.26061	2.42399	2.41908	1.47532	2.33032	2.88116	4.15413	2.2394	3.3478	3.62852	3.65557	1.43991	3.12916	5.84239	2.39667	3.93399	3.10804	3.50653	3.52472	2.97229	2.14164	1.2161	2.70871	1.69889	1.52208	0.0777854	3.37276	2.76661
TCGA-C5-A1BK-01	1.18691	2.24892	0.0973126	3.2524	1.96267	2.07518	1.31023	1.89949	2.27883	4.69603	1.7506	4.01387	2.23639	2.52881	1.84004	2.03408	3.02504	0.657623	3.29839	1.77444	2.10154	1.7383	1.35753	1.60589	0.744484	1.41797	2.01293	3.27558	0.923997	3.54245	3.74717	4.10736	1.05701	2.6969	6.12593	2.10713	3.23405	2.54673	3.03306	3.05508	2.8658	1.34746	0.967611	2.40066	1.07519	0.926836	0.108813	2.33248	2.02735
TCGA-C5-A1BL-01	1.08109	2.66517	0.0484113	3.05915	1.80893	2.80331	1.19639	2.43536	2.35049	4.87411	2.36113	3.94632	2.16854	3.53038	1.89865	1.1371	3.22897	1.25546	2.70208	1.25788	2.36752	2.41645	2.50223	1.92997	1.65664	2.60315	2.05568	4.41119	0.429179	3.6704	4.21115	3.5895	1.59019	3.2644	5.25752	2.41683	3.10919	1.83183	2.98905	3.62979	3.26429	2.18301	1.37498	2.87727	1.25186	1.93274	0.0280707	2.80685	2.9538
TCGA-C5-A1BM-01	0.884401	1.86606	0.0223786	3.75737	0.947741	1.69521	0.973786	1.33137	2.47393	5.03244	1.51184	3.71847	1.14002	2.57625	1.28445	2.12331	2.77686	0.893649	2.87667	1.85696	1.89158	1.06877	1.24455	1.72913	0.759607	1.46749	1.13996	2.10461	2.21451	2.67011	2.88375	3.43719	0.908477	3.81186	5.31945	2.45321	2.75673	1.47209	2.2312	3.63841	2.7585	1.34445	0.938866	2.6912	0.633828	1.63928	0.0758781	2.29948	2.33474
TCGA-C5-A1BN-01	1.02743	2.03863	0.0719629	4.09291	2.43756	2.7746	1.30612	2.04032	2.4519	4.95029	3.7559	4.37321	2.59401	3.20592	2.0948	0.760037	3.99586	1.25504	2.74848	1.97873	1.96331	2.76688	2.32037	2.25584	1.41149	2.36363	2.28428	4.61087	0.909785	3.67973	3.93781	3.85899	1.663	2.63958	5.71047	2.93164	3.04212	3.4776	2.91741	3.86412	2.8737	3.16604	2.88592	3.06688	1.27962	1.56783	0.0684474	2.73399	2.18737
TCGA-C5-A1BQ-01	1.14333	1.60101	0.0224385	2.88942	1.28565	2.74794	1.44206	2.02461	1.7088	5.00011	2.93207	3.53135	1.75585	2.93268	2.28424	1.07855	3.216	0.800141	2.90045	2.09619	3.02287	2.14774	2.13271	2.24609	0.761199	2.18751	2.34291	4.27725	1.49618	3.25545	3.26253	3.92674	1.02849	3.09163	6.37803	2.33465	4.02705	2.29216	2.8873	3.00409	2.67681	1.41125	1.39145	3.56643	1.36786	1.91926	0.0503758	2.63498	3.09199
TCGA-C5-A1M5-01	1.17394	2.42576	0.121721	3.19689	2.34033	2.5549	2.1365	2.78353	2.7712	4.97222	2.67527	4.23904	2.69149	3.08486	2.21689	1.41405	3.49173	1.03611	3.15366	1.91481	2.47927	2.14448	1.99221	2.88827	1.26291	2.50077	2.83504	4.1215	2.54243	4.14777	4.36066	4.02451	1.4609	3.48666	5.52862	2.1018	4.21882	2.28172	3.05168	3.40121	2.96314	1.84626	1.30663	2.24332	1.27213	1.62145	0.0411902	2.93299	3.02461
TCGA-C5-A1M6-01	1.1677	2.67561	0.163795	2.87316	2.38376	3.3478	1.39045	2.38229	2.69989	6.28591	2.04276	4.77202	2.61342	3.07151	2.79462	0.958132	3.30896	1.68166	3.68389	2.70428	2.21036	2.21258	1.98341	2.69277	1.77349	2.11558	2.5494	4.0291	2.78493	3.78655	4.38368	4.60631	1.92329	3.20009	5.58278	1.91586	3.73299	1.64958	2.77352	3.0654	3.30561	1.67567	1.07076	3.13129	1.40518	1.38234	0.0551086	3.60812	2.71183
TCGA-C5-A1M7-01	1.04749	2.23571	0.124011	3.39384	1.91331	2.21898	1.47564	1.92993	2.3778	4.66673	2.23152	4.00545	2.33157	3.20883	1.45313	2.03357	3.47814	1.37909	2.88301	2.23845	1.77908	1.91903	1.72805	2.77233	0.877937	2.004	2.88299	4.32651	1.35986	3.44588	3.40625	3.72624	1.04601	3.43746	5.15985	2.09764	3.98436	1.90422	2.58992	3.39299	3.16699	1.59761	1.09113	3.05751	0.594246	1.39692	0.147765	4.16078	3.01989
TCGA-C5-A1M8-01	0.702432	2.07951	0.0280313	2.91853	2.49034	2.63171	1.89584	2.63408	3.13154	6.17626	2.70925	4.29257	1.71534	3.2029	2.90871	1.68502	3.68667	1.01037	3.12537	2.77402	3.73679	1.79377	1.59012	2.36892	1.36217	2.19321	1.94595	3.65618	1.54517	4.59889	4.78031	4.56378	1.21661	3.39399	6.40306	2.23137	3.43306	2.24948	2.7823	3.06743	3.06987	0.67051	0.996337	2.03454	1.49175	0.905814	0.17259	3.01999	2.41198
TCGA-C5-A1M9-01	1.8583	2.28268	0.126674	3.88206	2.36074	3.62438	2.25686	2.19658	2.42696	5.3733	3.99064	3.90655	2.92872	2.87701	2.68696	1.12301	2.90758	0.888033	3.46883	1.79586	2.33295	2.08832	1.6018	2.54963	1.36941	2.309	3.44298	2.93843	2.66343	3.76244	3.82609	3.60506	1.2849	2.98898	5.28229	1.66102	4.35622	3.02879	3.01684	3.68205	2.93921	1.98898	1.06467	2.89751	1.00573	1.50463	0.304046	2.57355	2.84394
TCGA-C5-A1ME-01	0.632251	1.13145	0	2.54722	1.51963	1.92722	0.576741	1.39398	2.70557	5.99184	2.15742	3.28885	1.70761	1.7127	1.01952	0.780652	4.56348	0.354158	3.23214	2.85292	1.80767	2.62636	0.930521	1.23348	1.06468	1.43015	1.88625	2.59953	2.13652	3.34143	3.69408	3.636	0.461795	2.50314	6.08499	2.03897	3.42264	1.88775	2.83377	1.99047	1.66221	1.06302	0.732065	1.6108	0.644917	0.987927	0.116875	3.39346	2.61212
TCGA-C5-A1MF-01	0.260906	1.00565	0	1.27632	1.81329	1.67262	0.568683	1.4497	1.80762	5.99316	1.82977	3.12431	1.21528	1.28297	1.34656	0.887616	3.83915	0.315881	2.06179	2.18613	2.19108	2.2784	0.550907	1.17305	0.40915	1.20555	1.64104	2.99909	1.6743	3.34888	2.93713	3.7931	0.28961	2.12834	5.70367	0.892433	2.79552	1.4507	2.84696	1.95403	1.27956	0.30934	0.352337	1.48684	0.495142	0.72178	0.0653316	1.99675	1.77849
TCGA-C5-A1MH-01	1.30162	2.34186	0.104785	3.84855	1.55116	2.13332	1.43413	1.65969	2.22873	4.80542	2.54521	4.07116	1.94444	3.28793	1.77674	1.55139	3.66172	1.30375	2.83757	2.73937	2.47915	1.43999	1.67017	2.38284	1.36011	2.1042	2.57973	4.29137	2.09557	3.61139	3.09638	3.62433	1.24889	3.01835	5.54708	2.07075	3.96374	2.1995	2.66618	3.7512	2.98073	1.56714	1.10195	2.65831	0.982973	1.19024	0.0883404	2.26223	2.49282
TCGA-C5-A1MI-01	2.17917	1.97575	0.29945	2.72952	2.77111	2.94927	1.90109	2.99426	1.67026	5.40468	3.3548	4.99927	3.00153	2.73498	2.56053	1.5772	4.05861	1.26054	3.01771	2.19698	3.04696	1.16118	2.53862	3.35249	0.979868	2.63308	2.9244	4.5535	2.77286	3.72304	4.56216	4.15392	1.65486	3.38674	6.35874	2.15213	4.21303	3.2255	3.30082	3.78947	3.15201	2.42099	1.80236	2.95983	2.0002	1.46547	0.188745	2.81612	3.11819
TCGA-C5-A1MJ-01	1.6903	2.43695	0.172856	2.74682	2.22786	2.93071	2.1029	2.17632	1.50869	4.94719	3.15657	4.68464	2.72912	3.31519	2.19888	1.49848	2.94751	1.4616	3.05736	1.84258	2.12162	2.02435	2.95992	2.9518	1.95884	2.28002	3.09549	2.85732	2.94617	3.43266	4.01549	4.03084	1.22494	3.35222	5.24624	2.3248	4.02785	2.8384	2.92773	3.66944	2.67561	2.07532	1.50382	3.04619	1.46327	1.86364	0.0958639	2.84164	3.06397
TCGA-C5-A1MK-01	0.950238	1.99733	0.106643	3.12554	2.13564	2.51633	1.04662	2.02982	1.85525	4.31235	2.51389	4.2086	1.97263	2.80259	1.57662	1.29061	3.56387	1.03431	2.92161	2.00705	2.83102	1.93991	2.2817	2.03873	1.86238	1.70525	2.16561	2.90105	2.76636	3.4874	3.63741	3.46454	1.06727	3.24097	6.78822	2.83426	3.26789	1.98898	2.95035	3.09142	2.71149	1.70936	1.69492	3.11581	1.15919	1.81592	0.0775354	2.6686	2.71633
TCGA-C5-A1ML-01	1.52376	1.99693	0.0533555	3.37377	1.1149	2.30829	1.43021	2.05532	2.70453	5.38914	2.25845	4.45727	2.01895	2.68108	1.88746	1.39051	2.69165	1.10579	3.46913	2.74329	1.51884	1.60485	1.62703	2.12505	1.03906	2.52199	1.62621	3.90662	2.67459	3.4424	2.80883	4.60037	1.25426	3.86069	7.55778	2.16811	3.12623	2.32827	2.71375	3.13124	2.08906	1.83681	1.51538	3.5168	1.09801	2.0941	0.269015	2.72553	3.28578
TCGA-C5-A1MN-01	1.10214	1.63151	0.161894	4.23004	1.2454	2.45412	1.73936	1.81286	2.12203	5.16214	3.42594	2.99869	2.426	2.82088	1.88286	0.886883	3.69326	1.34371	2.50394	2.16679	2.41779	1.74495	2.65195	2.0842	1.63967	2.03733	1.70383	4.28467	2.089	3.12985	3.12917	3.12351	1.36328	2.73275	5.92649	2.70947	3.24313	2.44611	2.62365	2.8731	2.83934	2.05641	1.03132	2.31486	0.96776	1.09661	0.0365242	3.06027	2.17845
TCGA-C5-A1MP-01	1.46776	2.1927	0.172884	3.42762	1.55288	2.64973	1.17559	2.26875	2.36438	5.16385	2.85002	4.72518	1.79229	2.83167	1.89486	1.62128	3.3336	0.885884	3.56041	2.17722	2.39818	1.15636	1.95535	2.25365	1.29021	1.79734	2.18632	3.86487	2.07432	3.96116	3.64379	3.78957	0.916243	2.79576	6.54158	2.21976	3.76936	2.51248	2.79599	3.37341	2.93507	1.68771	1.18572	2.18557	1.3445	1.26494	0.110646	3.41806	2.55789
TCGA-C5-A1MQ-01	0.832769	0.79935	0.0505575	1.87043	1.07285	1.39166	0.676946	1.18696	1.69113	6.06578	2.0686	3.71271	1.40837	1.9934	1.26773	1.63052	4.76394	0.527405	3.90652	2.56063	1.93344	2.23071	0.761233	1.12257	0.573573	1.65632	1.6535	2.94041	1.83065	3.14252	2.53722	2.88731	0.487075	2.67677	4.30484	1.57043	3.31738	1.53712	2.75488	2.35015	2.0691	1.27853	1.04737	1.85866	0.919453	0.666921	0.0945905	2.532	2.36654
TCGA-C5-A2LS-01	1.35993	2.81886	0.0431279	2.17342	2.44812	3.44274	1.88516	2.57665	2.77422	5.49515	3.38978	4.81327	2.55322	3.30218	1.99916	2.28009	3.19497	1.41654	2.90186	1.99233	2.00803	1.248	1.8363	2.14433	1.71849	1.99994	2.85951	2.82467	2.99756	4.11209	3.78886	4.29698	1.45771	2.93896	6.62049	2.02203	3.66396	2.58623	2.85913	3.08647	3.23027	1.74167	1.0851	2.70522	1.73404	1.62713	0.210689	2.88341	2.77464
TCGA-C5-A2LT-01	1.42583	2.37591	0.0528442	2.41788	1.62584	1.59914	0.653167	0.627416	1.51134	3.74851	3.08931	3.07133	1.34556	1.71583	0.894575	1.11933	4.27263	0.753187	2.70948	2.06762	2.30532	1.58651	1.60086	1.37949	1.72545	2.36302	1.67182	2.39879	2.14995	3.71975	2.97877	3.15637	0.735234	3.37164	6.07774	2.28317	3.09064	2.9268	3.28257	2.39459	2.09161	1.47998	1.15998	1.93844	0.804839	1.24979	0.0569646	3.59107	2.48401
TCGA-C5-A2LV-01	0.837612	1.30825	0.0470298	3.75769	2.02101	2.56637	1.19855	1.68966	2.10549	5.63223	2.8283	3.68864	1.31731	2.55639	2.10411	0.763464	3.708	0.71931	3.09714	2.21674	2.36582	1.56419	0.897476	1.36503	0.99437	2.26083	2.14787	3.53844	0.27917	4.12355	3.64769	3.38576	1.41767	2.99463	4.47311	2.01609	3.19776	2.625	3.03735	3.0573	2.02676	1.158	0.937289	1.09172	0.511726	0.94385	0.0556787	2.63522	2.57143
TCGA-C5-A2LX-01	0.833114	1.74225	0.0132615	2.1431	2.24089	2.14262	0.619965	1.86132	2.74243	6.114	2.46247	3.77179	1.45251	1.98323	2.18196	1.29045	4.40771	0.817557	3.41463	2.81297	3.11728	1.8234	0.999344	1.21526	1.29326	2.44256	2.22095	4.62254	1.44555	4.03021	3.76585	4.41031	0.780788	2.9632	6.23595	1.51473	3.45175	1.71209	3.09083	2.88979	2.16337	0.82095	1.05068	1.65652	0.888849	1.06502	0.121315	2.56645	2.70131
TCGA-C5-A2LY-01	0.71644	2.27179	0.0101789	2.32843	1.75783	2.28392	1.13638	1.79601	2.68478	5.25105	2.27952	3.74983	1.38764	1.71226	1.71322	0.890784	3.93794	0.68803	2.70783	2.47809	2.27641	3.12221	0.73721	1.68423	1.46198	2.15736	2.18147	4.20269	1.86739	3.7551	3.56887	3.54083	0.807264	2.7653	5.66545	2.63212	3.54518	2.43364	2.69962	2.53344	2.33569	1.54557	0.702055	1.98335	0.554426	0.738904	0.0731016	2.44676	2.51804
TCGA-C5-A2LZ-01	1.43821	2.51911	0.0684931	3.44515	2.12361	2.5193	1.90074	2.34063	2.57509	5.39075	2.86314	4.48685	2.54992	3.14836	2.30935	1.68581	2.99113	1.14218	3.30277	1.87987	2.60453	1.87003	2.49505	2.54063	1.09728	2.30925	2.60612	3.99752	2.32367	4.03705	4.30366	3.95699	1.29789	3.27445	6.09318	2.61873	3.67233	2.85143	2.92174	3.67713	3.02207	2.14618	1.45995	2.64015	1.41987	1.40911	0.0709221	3.51886	3.09653
TCGA-C5-A2M1-01	2.03744	2.4649	0.0929276	2.68453	2.11509	3.30232	1.0488	1.82884	2.20725	5.25559	3.58798	3.44643	2.78074	3.02997	2.05619	1.29657	3.24937	1.10039	3.23107	2.04495	2.09332	3.148	2.40263	1.84567	1.51112	2.47994	2.95133	2.89585	3.27215	3.67853	3.97205	3.34407	0.953872	3.97253	5.61867	2.0665	3.93051	2.79907	3.13349	4.02543	2.85563	1.71926	0.981659	2.86738	0.748692	1.23463	0.359943	3.83884	2.98177
TCGA-C5-A2M2-01	1.28591	1.87738	0.0844426	2.91979	2.63125	3.08839	1.9356	2.35933	2.50198	4.80268	2.34361	4.29229	3.01321	3.26188	2.06092	1.10453	3.36117	1.1266	2.91615	2.14272	2.17232	1.65632	2.37611	1.90365	1.11811	2.63284	2.86185	3.20353	2.78335	3.87673	4.42452	4.50179	1.46719	3.26882	6.6646	1.85248	3.92981	2.26712	2.85311	3.63046	2.78015	1.9025	1.42807	2.96958	1.42647	1.80908	0.0503186	2.8614	3.19148
TCGA-C5-A3HD-01	1.76375	2.10086	0.0619053	3.40073	3.26869	2.17594	2.0265	2.63772	1.6459	4.85829	2.76295	4.22784	2.33824	2.97593	2.23959	0.893777	3.50819	1.38126	2.9053	1.65397	2.61495	3.78169	2.42874	2.13469	1.53328	1.70492	3.31392	4.64897	2.44055	4.54418	5.28076	2.8974	1.64392	3.52777	5.38137	2.02704	4.10628	3.14832	2.89224	3.73934	3.08277	2.26688	1.59166	1.92376	1.42531	1.27069	0.160661	3.34246	3.11664
TCGA-C5-A3HE-01	1.15084	1.89901	0.0270272	2.40528	2.53186	2.09237	0.864452	1.53284	2.11316	5.67514	2.51974	4.42677	2.0092	2.11782	1.74392	1.53283	2.57553	0.696361	3.24332	2.15506	1.71127	1.78672	1.58258	1.87817	0.73279	1.91497	2.27327	2.821	1.91281	3.63739	3.10311	3.45146	0.979382	2.4376	5.57767	1.79718	3.64438	2.20794	2.49641	3.66192	2.06382	1.6184	0.838585	1.9613	0.714334	0.794099	0.096813	2.79502	2.49828
TCGA-C5-A3HF-01	1.79138	2.37985	0.0729387	3.34413	1.76011	2.31518	1.46178	2.0076	2.01645	5.2545	2.79422	4.30531	2.52683	2.7209	1.74928	1.85173	3.23998	0.953344	3.16184	2.00645	1.58312	1.49471	2.28384	1.79291	0.777166	2.217	2.4512	3.07307	2.92486	3.32292	3.15891	3.55082	1.20698	2.98528	4.92996	1.98188	3.69964	2.60739	2.90434	3.38216	2.8798	1.822	1.04093	3.0752	1.59121	1.64545	0.0827495	2.68143	2.69846
TCGA-C5-A3HL-01	1.3815	2.73801	0.112611	3.36691	1.88274	2.60337	1.54932	2.13151	2.20044	5.28162	3.14433	3.56339	2.35144	2.67111	1.50046	1.00001	2.89493	1.02901	2.98366	1.65086	2.19989	1.53099	2.03409	2.22196	1.19497	2.14082	2.2824	4.15426	2.18392	3.65632	3.57817	3.79812	1.30469	3.59127	6.24464	2.22857	3.90567	2.50917	2.7996	3.29897	2.80589	1.86476	1.33365	3.00399	1.14948	1.819	0.0599584	2.80833	2.92737
TCGA-C5-A7CG-01	1.92296	2.29048	0.0786399	3.34359	1.91833	2.74134	1.41161	2.70195	2.27653	4.57518	2.43684	4.06489	2.22235	2.98658	1.89816	1.62621	3.28332	1.16115	3.10226	1.73793	2.48199	1.7216	1.83193	2.38631	1.27354	3.03481	2.72007	3.86886	1.74016	4.42814	3.63171	4.40569	1.61566	3.31305	5.55059	2.18174	4.15384	2.33958	2.70081	4.44977	3.02945	1.30513	1.0984	2.39738	1.13298	1.6534	0.155357	2.79966	3.32901
TCGA-C5-A7CH-01	0.783643	1.16185	0.0805438	3.06382	1.58653	1.98907	0.738944	1.91793	1.634	5.50421	2.34301	3.91819	1.6319	2.27609	2.04673	1.60604	3.30063	1.04508	3.16816	2.03289	1.96965	1.74239	1.48687	2.61526	1.59033	2.1922	1.81285	4.0111	1.53519	3.93892	3.27	2.84784	1.83675	2.76328	5.53851	1.91265	2.88779	2.76277	3.07027	2.40925	2.57533	1.85634	1.04143	3.02253	1.21165	0.887773	0.0584158	1.76092	1.90743
TCGA-C5-A7CJ-01	1.67789	2.44247	0.0606612	3.25194	2.05321	2.46154	2.08795	2.34772	2.31141	4.3849	2.97709	4.37745	1.90265	2.97123	1.64893	1.75709	2.70499	1.00761	2.93204	1.84302	2.15727	2.11058	1.94476	2.15161	1.13071	1.78256	1.82632	3.31286	2.32625	3.55566	4.24082	3.50404	1.23722	3.96857	6.52479	2.60936	3.29821	2.77489	2.68417	3.56739	2.95933	1.77466	1.44585	3.19962	1.51244	2.20264	0.229206	2.62298	2.87174
TCGA-C5-A7CK-01	1.5749	2.64128	0.0337085	3.02884	2.10156	2.85836	1.23495	2.64047	2.00665	5.16274	3.11924	4.3916	1.61006	2.92625	2.51078	1.65081	3.96412	1.32188	2.99598	1.65279	2.10845	1.1099	2.14333	2.78386	1.63385	2.9861	2.90664	4.07623	1.66502	4.59407	4.03365	3.85035	1.69986	3.32755	5.64148	1.60842	3.61169	2.56315	2.88286	3.16736	2.89506	1.58998	0.825466	3.30046	1.11329	1.62744	0.0995726	2.75386	2.65069
TCGA-C5-A7CL-01	1.05433	2.23764	0.0334253	3.1254	1.9619	2.65186	1.8516	2.12971	2.12773	4.31088	2.38441	5.14868	1.59125	2.76795	2.75426	1.72199	3.26642	1.21469	2.95022	1.53372	1.65603	2.54474	2.00891	2.03005	1.17884	2.42507	2.80349	3.68013	1.5827	4.39649	3.85186	4.14779	1.68577	3.28186	6.12857	2.47515	2.6914	2.2089	2.81266	2.6705	2.55405	1.87983	1.3738	2.96943	1.75457	1.99446	0.0572561	2.98362	2.78364
TCGA-C5-A7CM-01	1.48711	1.57428	0.0991684	1.90366	2.25184	2.21824	1.44565	1.94587	1.81458	5.61368	2.0994	3.73457	1.78941	2.05981	2.13471	1.73494	2.32395	1.24114	3.05434	1.61477	2.81791	1.98951	2.14832	2.28912	0.657092	2.02284	2.88943	2.36822	2.83554	3.53585	3.80242	3.70037	0.630007	2.80212	5.03819	2.48154	3.29621	1.92998	2.89898	2.63692	2.32267	1.68422	1.48901	1.99686	1.60961	1.34193	0.0746038	3.79766	3.00941
TCGA-C5-A7CO-01	1.36432	1.7843	0.0166043	2.69737	1.93651	2.50604	0.974812	2.76868	2.93485	5.6516	3.01533	3.59688	1.91405	2.56731	2.47599	1.87691	4.83316	0.807707	3.10936	2.24344	2.90638	1.92822	1.72482	2.11296	1.08976	2.66254	2.09055	3.34336	2.32594	3.91355	3.75922	4.24615	1.25429	3.32436	6.63384	2.39363	3.03768	2.60277	2.68962	2.91793	2.75879	1.75397	1.18492	2.53664	0.903032	1.56682	0.114334	2.73641	3.10665
TCGA-C5-A7UC-01	0.970992	2.05931	0.135801	3.81442	1.87276	2.23977	1.61123	1.7801	1.94471	4.72459	2.87989	3.60479	1.81757	2.84509	1.54967	1.2398	3.39158	0.574976	3.23247	2.43993	1.99911	1.95825	1.86548	2.98423	1.27197	1.96227	2.65647	3.00603	2.50461	3.25446	3.40074	2.93906	1.22059	2.57781	6.33987	2.54551	3.68235	3.47873	3.30757	3.12791	2.28508	2.10598	1.32312	2.46666	1.52111	1.16725	0.0774564	2.59	1.98555
TCGA-C5-A7UE-01	0.688649	1.73236	0.0413033	2.6082	1.46217	1.66819	0.665215	2.09685	2.41768	6.35173	3.00042	3.69436	1.47987	2.511	1.38778	1.53557	3.45975	0.732035	3.75021	2.7919	1.68547	0.952829	0.870689	2.54866	1.04381	2.7189	1.40748	4.3706	1.5016	4.28742	3.34322	3.6041	0.636529	2.53081	5.00021	2.08984	2.78395	2.08393	2.9884	2.11328	2.56211	0.64692	0.962418	2.0203	0.538441	0.81589	0.0268872	3.16359	2.13149
TCGA-C5-A7UH-01	1.16761	1.31971	0.0996475	3.67365	2.70483	2.61871	1.16249	2.03579	1.33316	4.4567	2.59051	3.48535	2.34652	2.82816	2.19813	2.39635	3.38783	1.24295	3.22891	1.85492	2.04508	2.45965	1.95743	2.85771	0.597345	2.21995	3.25466	4.38055	0.767882	3.49294	3.99304	4.01919	1.42346	3.4411	4.45472	2.05602	3.20716	2.50053	2.58925	4.03831	2.67978	2.43611	1.3194	3.76137	0.845724	1.43056	0.137973	3.61813	3.13298
TCGA-C5-A7UI-01	0.749074	1.66265	0	1.82933	1.54967	1.71513	0.84026	1.66592	3.04913	6.2907	2.7767	3.74856	1.57016	1.91311	1.97996	1.83917	4.38963	0.647739	3.48799	2.89777	2.08214	2.37607	1.37216	2.03585	0.752694	1.91692	1.68966	4.41721	1.27705	4.25973	3.60097	3.13761	0.616601	2.2414	6.43398	1.72346	3.03378	1.9622	3.31229	2.69069	2.12974	1.19911	1.02996	2.46871	0.855478	0.897877	0.100579	2.38708	2.37914
TCGA-C5-A7X3-01	1.34298	1.58224	0.021998	1.73407	2.42102	1.73588	0.524321	0.794102	1.98566	4.73587	3.30014	4.07939	1.6499	2.32134	1.46732	2.27741	4.32942	0.959468	3.18725	2.40624	2.951	2.80918	2.36388	2.5212	1.0645	1.60842	2.06648	2.65882	2.3983	3.67328	4.11976	3.23911	1.16163	2.51168	5.15355	2.46125	3.71343	2.16918	3.29799	3.2467	2.16007	1.83872	1.23488	1.45232	1.4364	0.768305	0.277756	2.88705	2.03698
TCGA-C5-A7X5-01	1.05886	2.31612	0.0780425	3.17151	1.78587	2.50875	1.22043	1.49541	1.9694	4.26804	1.90246	3.61487	2.09566	2.75696	2.26306	0.666908	3.76993	0.670338	3.2832	2.61082	2.62312	2.94625	2.10592	1.83088	1.39202	1.79406	2.14093	4.03469	2.04459	2.73839	3.54594	3.74394	1.17972	3.85679	5.03486	3.09122	3.33437	2.36393	2.7842	3.19893	2.24077	1.98777	1.27514	2.88679	0.544917	1.83821	0.0495082	2.66754	3.21284
TCGA-C5-A7X8-01	1.27422	1.77477	0.0612401	2.1928	1.63577	1.835	0.922381	1.5147	2.31113	5.8284	2.02819	4.69648	1.61531	2.17126	1.50014	2.59274	3.60478	0.792407	3.77753	3.16378	1.90104	2.00932	1.4141	3.01533	0.684421	2.19001	1.71272	3.00513	1.96179	3.77338	3.80959	3.64132	0.874762	2.58361	5.76371	1.80405	3.31177	1.8559	3.12323	2.51808	2.12271	1.23068	0.893133	2.46454	1.19845	1.18285	0.205285	2.65513	2.59738
TCGA-C5-A7XC-01	1.38433	2.35193	0.185708	3.33217	1.6849	2.31196	1.48801	1.67494	2.06633	4.01176	2.07472	4.08861	2.37783	2.74988	1.80246	1.70526	3.36201	1.10701	3.06063	2.40346	2.04709	2.08832	2.17449	2.72475	0.9201	2.14453	2.34236	3.46499	2.01764	3.47229	3.34658	3.96821	1.41892	3.72975	5.57106	2.29992	3.53849	2.49728	3.12526	3.46673	2.90003	2.00476	1.45746	2.53453	1.30517	1.79058	0.0916171	3.04568	3.4191
TCGA-C5-A8XH-01	0.852262	1.89793	0.0141353	2.67331	1.77939	1.81297	1.49439	2.51706	1.5393	5.33813	2.30652	4.20176	1.28144	2.05867	1.68587	1.00694	4.06236	0.853662	3.31136	2.04684	2.38912	2.71697	1.33097	1.70145	1.31656	1.64447	1.57752	3.55714	1.56974	3.49364	3.22306	3.46873	1.95471	2.49524	6.11287	1.75587	3.1777	1.65418	2.82833	3.03588	2.62668	1.58574	0.977442	3.52087	0.602331	0.987286	0.123379	2.63589	2.24646
TCGA-C5-A8XI-01	1.50428	2.39737	0.193433	3.10086	1.46223	2.40592	1.35478	2.30637	2.0131	4.85322	3.34882	4.70523	2.48122	2.67977	1.55766	1.86883	3.27717	0.774972	3.28579	2.0037	1.96474	1.60515	1.87009	2.3459	1.0813	1.73152	2.60135	3.90245	2.38625	3.73278	3.32744	4.14611	1.23887	3.17944	7.24496	1.91142	3.87928	2.52712	3.14711	3.36722	2.98239	1.30048	1.1774	2.92908	1.55043	1.71075	0.174635	2.57333	2.73798
TCGA-C5-A8XJ-01	1.66074	2.35999	0.0432586	3.30593	1.83529	3.32358	1.56867	3.04908	1.99562	4.08531	2.57409	4.21103	2.26934	2.98707	3.12136	2.09014	3.05595	1.48879	2.89985	2.078	2.58116	2.39235	2.87719	3.0561	0.975188	2.47802	2.19401	4.08722	2.40932	3.84405	4.34216	3.87685	1.53401	3.70796	5.29752	2.35629	3.11628	2.48227	3.40544	4.01903	2.66746	2.51949	1.80348	3.16411	1.94494	2.18832	0.726443	3.5276	3.20677
TCGA-C5-A8XK-01	0.988505	1.88052	0.081588	2.44382	2.17118	2.72356	1.16	1.97025	2.28302	5.28735	2.47724	3.81545	2.03955	2.95631	2.31184	1.77959	4.05585	1.20439	3.8266	2.03559	1.43814	2.99344	1.38273	3.27405	1.4416	2.22408	2.5778	3.98204	1.60872	4.35809	3.83536	3.40072	1.34476	3.09423	5.64028	1.97106	3.60203	2.98107	2.902	3.17164	2.692	1.89802	1.57975	2.73602	0.80253	1.11256	0.0279192	3.43363	2.81398
TCGA-C5-A8YQ-01	1.01649	2.78448	0.118792	2.49643	1.19048	1.72905	0.89089	1.16382	1.63404	5.17966	1.43883	4.14492	1.9997	2.02354	1.78957	2.78263	2.67625	0.830196	3.05956	2.59017	1.26646	2.10008	1.95263	1.92936	0.479388	1.18822	1.9216	2.82253	1.80899	2.578	2.8053	3.60406	0.5846	3.73247	5.63627	2.29849	3.04655	1.92564	2.52764	3.54484	2.31443	2.6111	1.67681	1.99875	1.59451	1.80115	0.389256	2.07936	2.93992
TCGA-C5-A8YR-01	1.32	1.54196	0.0785125	1.88879	1.80787	2.69456	1.35248	1.96214	3.07245	5.18994	2.77164	3.98861	1.85383	2.63089	2.71408	2.30856	3.96898	1.07934	2.99377	3.23855	2.67791	1.319	1.59311	3.47472	1.17263	2.25779	2.60541	2.3729	2.48612	3.8089	4.2524	4.62501	0.799442	3.44028	6.75747	2.39748	3.66003	2.28065	3.0156	3.19048	3.03445	1.52764	1.31626	1.69539	1.92718	1.33816	0.308579	4.0264	2.92954
TCGA-C5-A8YT-01	2.36725	2.29808	0.103451	2.59807	2.01895	2.37789	1.36555	1.6844	1.8648	4.709	2.49566	4.12492	2.30375	2.52523	1.68041	1.28388	3.38693	1.47993	3.74753	2.61127	1.79813	2.52985	2.27175	1.57331	0.988703	2.40568	2.55389	2.44799	3.05732	3.83681	3.46446	3.51423	1.2821	3.76526	3.20183	2.2868	4.13339	2.6511	3.11371	3.79435	2.2556	2.32082	1.23064	2.70256	1.84105	1.7918	0.274875	2.61552	3.09128
TCGA-C5-A8ZZ-01	1.75526	2.88136	0.0789049	2.72631	2.5405	2.40111	1.66172	2.43673	2.04834	5.66641	3.12516	3.86534	2.59845	2.80312	1.92361	1.35452	3.41007	1.2484	3.25845	2.08812	1.78061	1.01552	2.75536	2.83922	1.22342	2.98755	1.92207	4.26519	2.60607	3.91755	4.5367	3.79852	1.45517	3.36959	4.74001	2.51611	3.35294	2.77305	2.87889	3.72939	2.90439	2.04395	1.39148	3.75435	1.22023	1.73203	0.0915866	2.57494	2.73262
TCGA-C5-A901-01	0.724687	2.23318	0.121514	3.70333	1.28475	2.01252	1.50494	1.8527	1.05674	3.68786	1.77081	3.43865	1.82228	2.6016	1.10503	0.994786	3.01893	0.825435	2.68489	1.43315	1.31234	1.50331	1.61173	1.99374	0.98621	1.65131	2.06002	3.25645	1.13419	3.27841	3.15923	3.45985	0.960784	4.50321	5.44931	2.06673	3.41826	1.51166	2.75353	2.53427	2.63286	1.58755	1.17178	2.77237	0.68506	1.43181	0.0349948	2.52176	2.71391
TCGA-C5-A902-01	1.15283	1.65827	0.04026	2.63421	2.07539	2.31023	0.67635	2.48846	2.00986	6.07459	1.9237	5.05878	2.6703	2.61235	2.57554	1.45118	3.65195	0.981648	4.02458	2.71772	2.51839	1.71908	1.97031	1.63901	0.66624	2.25418	1.65269	3.76602	0.726125	4.21366	3.31947	4.4097	1.21916	3.03683	5.75939	1.38308	3.22173	2.02942	3.38858	4.12679	2.68125	1.20715	0.770085	2.94093	1.25381	1.47414	0.118411	1.69577	3.05315
TCGA-C5-A905-01	1.14741	2.45555	0.128612	3.26151	2.33317	2.65196	1.64371	1.86877	2.22013	5.40267	3.47894	3.70576	2.07042	2.86568	2.16373	1.56103	3.48108	0.847801	3.74064	1.61927	1.98934	1.71752	1.73523	2.55249	1.24535	1.79618	3.074	4.39018	1.90525	4.26191	3.44612	3.96923	1.22047	3.22314	6.15472	2.31726	3.6971	2.86318	2.94962	2.69942	2.98663	1.98699	1.3457	2.08543	0.879614	1.09134	0.0237219	4.08905	2.93425
TCGA-C5-A907-01	1.60384	1.56774	0.0467397	3.24079	2.18672	2.33729	0.898469	2.25807	2.594	5.8972	2.98252	4.02182	2.21471	2.52723	2.17826	1.83117	4.26391	1.13346	3.10073	2.18463	2.2764	2.18194	2.2577	2.86898	0.75098	2.12269	2.43161	3.1511	2.67584	3.2	3.79533	4.02295	1.10864	2.51711	4.50603	2.07801	3.82693	2.02594	3.44249	3.49056	2.6438	1.66447	1.28218	2.57277	1.72842	1.18323	0.265322	3.14143	2.77487
TCGA-DG-A2KH-01	1.58799	2.25147	0.0871429	2.72767	2.46196	3.21521	1.96416	2.13533	3.18152	6.56635	3.28489	4.48148	3.0228	2.8814	2.09396	1.73002	3.34757	2.34073	3.17292	2.02842	2.77771	2.1573	2.58646	2.6449	1.19622	2.25943	2.99968	2.91028	2.61807	3.65158	4.22811	4.31874	1.17694	3.30483	5.4097	2.07973	4.36362	2.73834	2.93826	3.11385	2.71714	1.41216	1.4886	2.36938	1.42712	1.83561	0.224089	2.94379	3.08047
TCGA-DG-A2KJ-01	0.334796	0.492209	0	1.24977	0.640751	1.73803	0.269498	0.563741	4.05552	7.00126	2.96987	2.02099	1.24486	0.910499	1.0539	1.46844	5.2784	0.360636	3.68218	4.7922	2.35655	2.51402	0.980314	0.8617	0.551423	1.23208	1.69918	1.76797	1.83011	2.93713	3.05278	2.25955	0.122173	1.71419	4.23576	1.75942	2.22304	1.4333	2.37863	1.74884	1.65487	0.367588	0.56289	0.737743	0.272538	0.386404	0.140156	2.40492	1.68952
TCGA-DG-A2KK-01	0.971623	2.16201	0.0707436	2.21102	1.38482	2.90258	1.60488	1.69931	2.1542	4.67892	2.34514	4.20969	2.44817	2.74389	2.64994	1.29451	3.64334	0.784105	3.61667	2.04467	1.99592	1.56896	1.63808	2.53569	0.814002	2.45623	2.80885	3.75245	2.39812	4.31345	2.92084	3.87072	1.08575	3.23918	6.08518	1.96048	3.94489	1.92121	3.38152	2.92494	2.68973	2.01227	1.25235	2.58809	1.22933	1.3791	0.322571	2.6722	2.96306
TCGA-DG-A2KL-01	1.40477	2.35157	0.110364	3.9246	1.69893	2.27034	1.28159	2.26266	2.21972	3.82257	2.87477	3.90283	1.66097	2.91042	1.18033	1.93385	3.2485	1.58188	2.76664	1.37923	2.19312	1.59764	2.27233	2.03788	1.36948	2.09268	1.97352	3.85223	1.97857	3.59942	4.00705	4.09217	1.10978	4.04121	6.25474	2.3347	3.41586	2.80622	2.52321	3.51316	2.704	1.27153	0.908822	2.45952	0.808346	2.05634	0.0761539	2.62165	2.72574
TCGA-DG-A2KM-01	2.41602	2.35901	0.0477257	3.20406	1.88429	1.96403	1.42655	1.71153	1.62651	4.5777	2.44174	3.62121	2.47076	2.36705	1.535	1.56749	3.36684	1.31298	2.76476	1.34242	3.36421	1.28148	1.81505	1.91126	0.874002	1.59692	1.96327	2.73637	1.85476	3.97195	3.52573	3.271	1.16018	3.61084	5.75259	2.25354	3.47146	2.49371	2.95038	3.66898	2.43761	1.43987	1.51287	2.96469	1.25057	1.77857	0.209301	2.3966	2.83197
TCGA-DR-A0ZL-01	0.973462	2.4488	0.0714182	3.23562	2.4267	2.67882	1.11891	2.65736	2.7261	4.95745	2.92514	4.56397	2.8078	3.08539	2.19437	2.10189	3.59401	1.26302	3.12662	2.06798	2.22448	2.79965	1.86679	2.65365	1.20846	2.37722	1.99534	4.01532	1.27478	3.72457	4.35108	3.87065	1.48641	2.81447	6.69361	1.45512	3.16012	2.41819	3.12414	3.58153	3.30616	1.34467	0.783829	2.60599	0.910923	0.945434	0.0591278	2.97513	2.34883
TCGA-DR-A0ZM-01	0.980925	1.41957	0.0291353	2.18157	0.91265	0.792566	0.465714	1.26694	2.1027	4.35695	1.12929	4.16948	2.00985	1.31801	0.736303	1.46964	3.36298	0.497769	2.90097	1.80739	1.61986	1.71996	0.822651	1.00556	0.276859	0.80206	1.08842	1.8861	2.57601	2.53465	2.18352	3.43752	0.470443	2.07294	6.37634	2.03057	2.52155	1.88154	2.4437	2.72523	1.96267	1.0715	0.7778	2.02308	1.19022	1.19445	0.258219	1.50441	2.05244
TCGA-DS-A0VK-01	0.724095	1.92794	0.0464952	3.37247	1.57706	2.10711	1.0638	1.70859	2.22341	4.1009	2.44074	3.42487	2.72586	2.67004	1.56359	0.801445	3.58018	0.982029	2.04442	2.37336	2.54798	2.89101	1.94784	1.66319	0.674713	2.1727	1.2101	3.62469	1.7529	3.33986	3.26806	3.71735	0.958136	2.96081	6.22313	1.99076	3.04048	1.9028	2.76709	2.56114	3.08689	1.97284	1.38107	2.25922	1.2762	0.962584	0.0424447	2.74278	2.54521
TCGA-DS-A0VL-01	0.877453	2.99984	0.184253	2.84395	2.39802	2.74233	1.56085	2.29138	2.358	4.8046	2.37895	4.38686	2.5357	2.84297	1.92388	1.35625	2.93226	0.872119	3.09066	1.52779	1.98929	2.74361	2.0894	2.49613	1.09733	2.15195	2.78244	4.06201	2.12733	3.95524	4.10793	4.02593	1.39535	3.12844	6.67645	2.19109	3.75617	2.89656	2.93216	3.62123	3.36323	1.60524	1.38726	2.5961	1.21436	1.32948	0.0663439	2.77449	2.6259
TCGA-DS-A0VM-01	0.768757	2.01852	0.0113589	2.69813	1.79661	2.56796	0.755489	1.79018	2.06173	5.34001	3.17232	3.85654	2.7553	2.54827	2.25224	1.17796	3.07305	0.78467	2.81094	2.71792	2.21292	3.40147	1.29203	2.09738	1.46591	2.15297	2.39136	3.87551	1.84137	4.02378	3.80826	3.96523	0.82902	2.40602	4.92517	2.00682	3.12166	2.49238	2.68179	3.46703	3.03277	1.40076	1.03538	3.07929	1.18019	0.813022	0.0484208	2.39964	2.07037
TCGA-DS-A0VN-01	0.894308	1.6921	0.0543584	3.49952	1.81672	1.5559	0.893288	1.15726	2.19462	4.98735	3.00283	3.41915	1.41371	2.38423	1.61708	1.52827	2.64875	0.762195	3.04098	1.99487	1.60747	1.61988	1.23115	2.08267	1.20791	2.10566	1.58651	3.04227	1.34048	4.12926	3.47675	2.92345	1.23452	2.9202	5.58749	2.01991	3.23623	2.07723	2.54692	3.22807	2.39235	1.30267	0.978393	1.97157	0.548209	1.2394	0.0631808	2.49213	2.45299
TCGA-DS-A1O9-01	0.923712	2.20783	0.0876159	2.9952	1.48434	2.11279	1.16283	1.82745	2.32899	4.72347	2.05473	3.50224	1.51873	3.33455	1.4138	1.01842	2.75859	1.13067	2.70308	2.11587	2.62935	2.57397	1.48197	1.81646	1.087	1.72471	1.92344	2.72174	2.26728	3.56683	3.32934	3.58558	0.939079	3.24054	6.65281	2.68695	3.7279	1.46638	2.64309	2.99674	2.89689	2.30085	1.74088	2.95312	1.14779	1.44847	0.0384878	2.63631	2.72314
TCGA-DS-A1OA-01	1.53061	2.27512	0.27146	3.20577	2.30046	2.28494	1.49968	1.8445	2.63508	4.82814	2.95366	4.24196	2.32308	2.60854	2.18275	1.25588	3.0469	0.928964	3.08534	2.25366	2.53931	1.54141	2.37181	2.21119	0.863319	1.935	2.53662	3.39547	2.28323	4.10298	4.25504	4.75749	1.04989	3.58794	6.99909	2.1089	3.96349	2.90848	3.11641	3.55774	3.2372	1.60615	1.39995	2.18446	1.45492	1.43706	0.0792398	2.67415	2.84133
TCGA-DS-A1OB-01	0.869038	1.90549	0.14824	2.19575	1.57341	2.8153	1.0307	1.54942	2.44138	6.20222	2.85575	3.95918	2.0758	3.09145	2.56456	2.06034	3.26506	0.920045	2.88209	2.44558	2.67423	1.5743	1.59347	1.55744	1.26874	1.55888	2.7768	4.07758	2.13779	3.72416	3.33126	3.54895	1.37395	3.43534	5.84115	3.87019	3.71044	1.79183	2.2726	3.31683	2.36197	2.75394	2.02745	2.95213	0.914807	1.85222	1.08508	3.04215	3.38766
TCGA-DS-A1OC-01	1.14898	2.70037	0.154031	3.59356	2.55829	2.71683	1.17417	3.15892	2.60891	5.27595	2.26772	4.58578	2.77474	2.18216	2.14032	1.05336	2.78082	1.87253	2.88837	2.24766	3.04697	3.53885	2.25815	1.44769	2.11222	2.10869	3.08118	4.41539	2.11083	3.04996	4.37572	4.36442	1.27622	4.1908	7.24818	2.38733	3.79443	2.16426	3.15202	3.82207	3.95413	2.49013	1.94542	2.61565	1.85336	1.43581	0.119682	3.28688	2.52658
TCGA-DS-A1OD-01	1.85039	2.19432	0.0692306	2.69211	2.26598	2.25694	1.65183	2.5008	2.59182	4.50802	2.88915	4.64089	2.2107	2.20662	2.5087	1.71992	4.69577	0.934993	2.93817	2.16556	3.64202	2.00177	1.63039	2.70543	1.59322	1.95137	2.67471	3.60581	2.44786	3.68612	3.99987	4.40928	1.09235	2.52676	6.89881	1.91738	3.9381	2.8102	3.27682	4.14227	2.73009	1.36864	1.15983	2.76279	1.74562	1.37104	0.0931704	3.2647	2.50468
TCGA-DS-A3LQ-01	1.09477	2.50835	0.0465194	3.06356	1.60748	3.09723	0.997865	2.11069	2.00283	5.64718	1.72933	2.9986	2.02287	2.24174	2.1442	0.760282	3.64037	1.49204	3.37458	1.60611	1.83362	1.75879	1.94355	0.974589	0.78776	2.46845	1.43655	3.81936	1.6076	3.45185	2.6774	3.63202	0.984741	3.25754	5.08957	2.15679	3.54832	2.11033	1.87913	3.18124	3.06537	1.40687	0.908174	2.36597	0.61686	1.0576	0.0673056	2.838	2.39028
TCGA-DS-A5RQ-01	0.678121	1.81471	0.00905423	3.22541	1.41473	2.01366	1.13002	1.53036	2.12282	4.64893	2.01799	3.32388	1.8355	2.43874	1.1528	1.43851	2.69785	0.905605	2.96309	1.64196	1.90856	2.32878	1.17671	1.67568	1.35266	1.75461	1.26031	3.91674	2.10405	3.77078	3.47813	3.85856	1.05708	3.51082	7.90854	2.43482	2.99902	1.67202	2.23467	3.10263	2.67881	1.3118	1.09148	2.27742	0.636034	1.34741	0.0233421	2.47596	2.42507
TCGA-DS-A7WF-01	2.09382	1.87432	0.140017	4.12894	2.25153	2.83554	1.96985	3.06904	1.92496	4.78038	3.45658	4.10743	2.58022	3.07717	1.91415	1.6735	3.29338	1.10149	3.3256	2.02859	2.44482	1.03619	2.28875	2.72061	1.12753	2.94819	2.82015	3.57914	2.61829	4.0823	3.89635	4.37315	1.59408	3.79275	5.77586	1.95023	3.97401	3.01852	3.67102	3.60494	2.73279	2.11606	1.29142	2.61059	1.76394	1.52199	0.121703	3.25522	3.23631
TCGA-DS-A7WH-01	1.40282	1.99945	0.150873	3.61791	1.92799	2.655	1.24241	2.03905	1.74346	4.32999	3.10752	4.91135	2.3358	2.44398	1.13919	1.07202	4.79387	0.586912	3.06097	2.00418	1.31144	1.03929	1.84045	2.33983	1.29164	1.37138	2.97378	3.41817	2.00824	3.76188	4.39689	2.94575	1.05342	3.43753	5.24965	1.91149	3.92805	2.09123	3.13088	2.93992	2.1084	0.660864	1.10975	2.0549	1.42775	2.20776	0.0743577	2.60386	2.06399
TCGA-DS-A7WI-01	0.334711	1.37401	0.0374304	2.25316	1.70222	1.65329	0.898376	1.47187	2.31278	5.26538	1.83415	4.36065	1.32205	1.67392	2.02127	1.54832	4.80816	0.49748	3.2882	2.99933	2.2119	3.21247	1.07281	2.01757	0.702139	1.54405	2.11136	3.57423	1.3763	3.68178	3.09528	3.47605	0.657122	2.68457	6.17596	1.9539	3.34767	2.68369	4.03622	1.80811	1.91421	1.19968	1.08289	1.49226	0.722465	0.681623	0.0562011	1.99823	1.9933
TCGA-EA-A1QS-01	1.68141	2.52102	0.138143	3.62908	1.25016	1.69287	0.712009	1.92145	1.72413	3.94372	2.83096	3.71185	1.75537	2.47871	1.22598	0.966178	3.86754	1.06738	3.00947	1.95648	2.40592	1.76358	2.23214	1.7009	0.957694	1.61803	1.80156	3.7508	2.20477	2.6763	2.46673	3.03045	1.24783	3.13371	5.27607	2.03374	3.98629	2.29643	2.89664	3.20584	2.52114	1.51521	0.928483	2.89137	1.37806	1.38395	0.0662715	2.85702	2.81176
TCGA-EA-A1QT-01	0.929695	2.11827	0.249324	2.76488	2.12444	2.55317	1.12649	1.93177	3.35554	5.76258	2.8952	4.30226	2.61009	3.42078	2.38625	1.74374	3.17131	1.12711	3.20625	2.04323	3.30602	2.8714	2.49527	2.86603	1.50642	2.21536	2.86963	5.2205	2.25561	4.09524	4.01339	4.19514	1.36941	2.92169	4.83598	2.60709	4.4973	1.9448	3.31836	3.77919	3.45242	1.88952	1.57414	2.64551	1.00063	1.05528	0.079609	3.17462	2.58723
TCGA-EA-A3HQ-01	1.25562	2.67848	0.123508	4.00038	2.49995	2.78494	1.6579	3.03683	2.54815	5.22432	3.13565	3.93203	2.60562	3.71718	1.51749	1.17657	3.02389	1.44193	3.37909	1.78186	2.46271	1.52207	2.49203	2.77	1.52669	2.24102	2.35076	3.9041	2.55037	3.66184	4.41605	3.69357	1.32428	3.51466	5.49263	2.47386	3.56977	2.94683	2.37915	4.13221	3.87009	1.82851	1.04752	3.48438	0.8624	1.76917	0.0285867	2.83459	2.87103
TCGA-EA-A3HR-01	0.924085	2.26676	0.203959	3.34858	2.03324	2.73416	1.65079	2.56263	1.15604	3.73597	2.28766	3.76989	2.54465	3.03214	1.46567	1.11695	2.12342	1.34974	2.38424	1.11296	3.07996	1.49032	2.25456	2.01441	1.33618	1.23171	2.37459	3.66571	2.32788	2.79461	3.4832	3.08488	1.30786	3.43176	5.85273	2.60731	3.4739	2.85359	2.35738	3.35886	3.23698	2.13056	1.25962	3.2826	1.71099	1.72372	0.0742008	3.52488	2.92266
TCGA-EA-A3HS-01	1.53766	2.85605	0.0928904	3.28445	1.76505	2.78908	1.47601	2.11367	2.25377	4.78909	3.38484	4.71218	2.46122	3.36894	2.03583	1.51569	2.97578	1.02984	3.33784	1.68267	2.47226	1.71451	2.40602	2.6135	1.13355	2.30784	2.171	4.33956	2.12103	4.07975	3.78918	4.04298	1.34851	3.83582	6.33953	2.26365	2.82964	3.0555	3.18437	3.77335	3.51557	2.27642	1.61922	3.09682	1.10733	2.00325	0.0307429	2.98527	3.45366
TCGA-EA-A3HT-01	1.39519	2.93507	0.112449	3.50203	1.90852	2.27486	1.94411	2.01802	2.2029	4.26042	2.84864	4.02832	2.1708	2.99051	1.82036	1.1494	3.17171	0.980814	2.76455	1.64362	2.06796	1.93861	1.88632	1.79571	1.79153	1.67033	2.66647	3.00709	2.23419	3.26301	3.55926	3.47045	1.17917	3.54335	6.59587	2.23842	3.7488	2.52611	2.44782	2.87097	2.69217	1.67977	1.22264	2.36199	0.877384	1.84887	0.099865	2.48523	2.90177
TCGA-EA-A3HU-01	1.63532	2.50765	0.0406501	2.97407	1.39446	2.4195	1.5735	2.49606	1.90281	4.95812	3.27989	3.24742	1.81112	2.83497	1.74287	0.751549	3.96433	0.934035	2.7577	1.73354	1.8231	1.76847	1.21317	2.14114	1.40428	2.62474	1.66617	3.57398	2.31216	3.53627	2.98921	3.83971	1.38879	3.62655	7.15778	2.23018	2.38077	2.48743	2.26092	3.80811	2.59676	1.67152	1.17388	3.1891	0.71832	2.00332	0.405299	2.50822	3.03386
TCGA-EA-A3QD-01	1.63907	1.74623	0.0736123	2.63267	1.96984	2.19629	0.866609	1.95797	2.73343	5.81914	2.23487	4.31666	1.64722	2.46537	2.71443	2.12925	3.71707	1.10234	3.91135	2.32247	2.02793	2.65657	1.72583	2.93557	1.4296	1.75426	1.55657	2.82691	2.3736	3.78026	3.7428	4.08549	1.31742	2.7633	5.07236	2.21262	2.9932	3.07579	3.17142	3.06006	2.71994	1.57632	1.52868	2.71397	1.34933	1.27524	0.24807	2.7432	3.00974
TCGA-EA-A3QE-01	1.58027	1.96508	0.0469463	3.72667	1.67026	2.37691	1.17755	1.90247	1.97234	4.65544	2.21864	3.92751	2.37793	1.93146	1.81943	1.55154	2.84998	1.08671	2.60745	1.22734	1.91301	1.29703	2.17732	1.98229	0.948539	1.50263	1.7092	2.75945	2.00802	3.37825	3.43477	3.53185	1.88131	3.92823	5.82835	2.16507	2.6315	2.53004	2.81402	3.58435	2.99162	1.94309	1.25119	2.34898	1.0657	1.75094	0.208543	2.37638	2.8263
TCGA-EA-A3Y4-01	0.956272	1.17304	0	2.43193	1.48617	1.6728	0.591972	1.4807	2.39904	5.40488	2.20909	3.63427	1.35111	1.36943	1.43335	1.88889	3.85666	0.39777	3.05428	2.21981	2.21594	1.5883	0.826238	1.84064	0.45553	1.51869	2.11882	2.01742	1.88786	3.04793	2.74064	3.40444	0.479292	2.1159	5.55042	1.56473	2.87666	1.87615	3.00896	2.90609	1.72509	0.909815	0.938246	1.46804	1.30001	0.931522	0.0547105	2.78747	2.28627
TCGA-EA-A410-01	1.19328	1.33188	0.0501827	2.03266	2.78212	2.35187	1.3476	1.50768	1.76458	7.0504	3.21934	3.84081	2.66846	2.3808	2.13864	1.99916	3.41289	1.07812	3.97824	2.73813	2.10255	1.4052	1.83291	3.50428	1.00678	2.72967	2.77171	3.23057	3.78456	4.10311	4.07937	3.19832	1.055	3.19547	2.70338	2.2771	3.53777	2.80652	3.96518	2.3851	2.30581	1.74786	1.07059	3.04451	1.4663	1.03703	0.482738	2.45024	3.37214
TCGA-EA-A411-01	1.36377	2.07573	0.0756948	2.68942	2.11864	2.79359	1.35666	2.21069	2.77514	5.44671	2.28841	4.46309	2.83016	3.11099	2.4575	1.78533	3.66314	1.00043	3.24387	2.41245	2.85784	2.28446	1.91457	2.59652	1.14427	1.68841	2.21278	3.203	1.6339	3.33308	4.02354	4.26288	1.20126	2.62871	6.09561	2.35427	3.39723	2.66048	2.79644	3.62766	2.92805	1.85443	1.00228	2.59444	2.09354	1.31761	0.134478	2.97694	2.61862
TCGA-EA-A439-01	1.5	2.17345	0.0734364	2.62179	2.0615	1.66205	1.94137	2.8798	2.06089	5.65402	3.04861	4.69172	2.46912	3.17227	2.01522	0.825156	3.04297	1.22427	3.11944	1.64718	2.07986	1.51577	1.46481	3.0283	1.20355	2.51671	2.30581	3.21979	2.29048	3.83237	3.86064	4.5957	1.6189	3.0482	6.20591	2.02182	3.89101	2.64361	2.84436	3.51773	2.95176	1.7116	1.19382	2.96107	1.40277	1.50673	0.0982389	3.79314	3.01572
TCGA-EA-A43B-01	0.331119	1.33308	0.0343517	2.88868	1.83972	1.89054	1.04448	1.46784	2.1028	5.51216	1.89514	3.70484	1.39189	2.27506	1.7648	1.40241	3.39621	0.437786	3.70699	2.91414	1.82009	3.21068	0.548541	1.59796	1.34063	1.70977	2.20936	3.86264	0.984466	3.64643	3.26458	2.82234	0.81214	2.38292	5.83059	1.79954	3.33604	1.89127	2.68112	2.10053	2.02263	1.15799	1.14283	2.62273	0.596246	0.768025	0.0779181	2.79428	2.03233
TCGA-EA-A44S-01	1.26965	1.95145	0.0240023	3.2148	1.98647	2.49538	1.4808	2.85621	3.50954	5.82963	3.37913	4.39827	2.15616	2.87316	2.72074	2.26694	3.45426	1.21005	3.26792	2.08697	2.82394	1.2513	1.59729	2.24952	1.20826	1.86922	1.94345	3.3273	1.51184	3.72141	4.01655	4.52929	1.41981	3.15807	6.90295	2.4451	3.15072	3.15261	3.0171	3.48352	2.91595	1.2092	1.3681	1.73003	2.01836	1.51048	0.0845651	2.82462	3.21618
TCGA-EA-A4BA-01	1.45432	1.74872	0	2.63377	2.13926	1.73649	1.05741	1.2386	2.907	4.59201	2.88989	4.08903	1.98552	1.23954	1.72024	2.31665	3.33869	0.646755	3.82909	2.97598	1.35102	1.83169	1.42598	1.5192	0.751122	1.77493	2.15978	1.60245	3.43244	3.13079	2.87295	3.60249	0.997435	2.82984	6.88032	2.27694	3.41246	2.43098	2.92248	4.14443	1.92423	1.45649	1.03904	1.47992	2.02092	1.62504	0.367851	2.13514	2.87402
TCGA-EA-A50E-01	0.980651	2.09969	0.0360152	2.29403	1.56023	2.30381	1.49291	1.64147	2.0104	4.78811	2.23792	3.31471	1.85047	2.5432	1.77036	1.92232	3.10665	0.881095	3.38577	1.96455	2.2184	1.99819	1.5801	1.83191	0.919351	1.51269	1.8309	2.82708	1.35869	3.0066	3.30684	4.06454	1.36734	3.17923	5.85862	3.00385	3.01342	2.57922	2.83995	3.71361	2.8815	2.15986	1.15897	2.49173	0.876921	1.27825	0.262077	2.67518	2.92039
TCGA-EA-A556-01	1.54589	1.93244	0.125899	2.32156	1.84355	0.997634	1.09248	0.688353	2.07357	4.643	2.82973	4.4806	1.82174	2.20652	2.78804	2.06487	3.42285	1.40066	3.93368	3.23861	1.23077	2.50029	1.68986	1.91721	1.3525	1.69339	2.17299	2.641	2.51745	3.67753	2.84337	2.97296	0.86849	3.33626	5.12952	2.38876	3.48146	2.4525	3.05942	3.9583	2.31612	2.32351	1.81984	1.94809	2.08322	1.40753	0.128048	2.67192	3.15126
TCGA-EA-A5FO-01	1.90896	2.49734	0.159117	2.93875	2.38607	3.13867	2.10866	2.60532	2.92125	4.3841	3.79759	4.03041	2.97825	3.10975	2.30748	1.4407	3.80615	1.02905	3.19503	1.95468	2.33701	2.02365	2.39318	2.46443	1.84076	2.70817	2.96233	4.37207	2.90749	3.96853	3.97238	4.61936	1.42208	3.32494	6.543	2.20581	4.14919	3.12052	3.0414	3.64009	2.82855	2.17659	1.92387	2.92638	1.9741	1.97121	0.130637	3.15523	2.97893
TCGA-EA-A5O9-01	0.338095	2.03293	0.122928	3.58836	2.19229	2.09849	1.33812	2.39711	2.59478	5.81841	1.68002	3.79099	1.79819	2.67384	1.51719	0.943192	3.26731	0.978549	3.73812	2.28271	2.47077	2.33145	1.4375	2.35274	1.11784	1.61967	1.97655	4.08321	0.165505	4.30556	3.7964	3.89426	1.09485	3.08922	6.67989	2.20113	3.06745	2.21851	2.58387	2.72898	2.50718	1.14105	0.939115	2.35327	0.449885	1.23238	0.0103518	3.20867	2.94359
TCGA-EA-A5ZD-01	1.31581	2.80972	0.0518408	4.17162	1.89834	2.68692	1.4746	2.11275	2.30785	4.42644	2.77475	4.46018	2.25396	2.95788	1.9819	1.55828	3.91359	1.00669	3.15534	2.06705	2.45132	2.00078	1.9749	2.22177	1.03541	1.95526	2.77109	4.26339	2.08349	3.83209	4.07408	3.7422	1.43155	3.74706	6.70795	2.00459	4.02878	2.72825	2.7463	3.27878	2.97705	1.99474	1.29382	2.76926	1.03085	1.32091	0.0448794	2.46365	2.94884
TCGA-EA-A5ZE-01	1.54965	2.55337	0.0445069	2.57782	1.85017	2.37088	1.30691	1.67156	2.45759	5.1244	2.29816	4.94991	2.68826	2.66195	1.73448	1.3614	3.50962	1.00364	3.11949	2.13527	2.07636	2.19968	1.62972	1.90227	0.591534	2.66004	1.77663	4.12445	0.765366	4.05278	3.44655	4.60489	1.03978	3.10066	5.96083	2.16705	3.23886	2.60105	2.97303	2.94976	2.81879	1.99959	1.47647	2.67404	1.42149	1.79827	0.094431	2.76066	2.96651
TCGA-EA-A5ZF-01	1.17574	2.64299	0.0526696	2.1472	1.98144	3.2443	1.36025	2.41434	3.06047	6.33767	2.46903	4.3493	2.73245	3.02356	2.48643	1.63611	3.97193	1.32023	3.59583	2.28355	2.86157	2.16477	1.7463	2.65802	1.05187	2.34971	2.29391	3.68566	2.85472	3.32582	3.78235	4.29757	1.30382	2.96243	5.89278	1.97389	3.79199	2.69576	2.74844	2.86584	3.24068	1.78498	0.872564	2.97306	1.40794	1.44724	0.129162	4.10225	2.91601
TCGA-EA-A6QX-01	1.32007	1.97683	0.0847473	2.41163	1.89963	2.64603	2.20967	2.34961	2.37823	5.37781	3.2773	4.76558	2.83574	3.00619	2.7043	1.9952	3.41201	0.98373	3.08574	2.5486	2.71694	2.50175	2.02306	2.69184	1.0776	2.54695	2.26932	3.29253	1.67466	4.26312	3.99953	4.27787	1.41546	3.34248	6.45099	2.32151	3.20805	2.32288	3.25544	2.93393	3.12729	2.09065	1.3823	2.09448	1.05053	1.70964	0.0554566	2.8494	3.22898
TCGA-EA-A78R-01	0.515353	2.04537	0.00990882	2.47163	1.65861	2.05342	1.1799	1.86152	3.11717	6.19446	2.13015	3.28396	1.28309	2.26725	1.58592	1.08911	3.43396	0.807046	2.8388	2.44399	2.20674	2.41943	0.935518	1.62146	0.747573	1.76504	2.17856	3.66525	1.59636	3.88969	3.53877	3.79193	0.850548	2.82232	6.58442	2.17477	3.97532	1.46943	2.68945	2.74328	2.58384	0.990295	1.01777	1.90521	0.788962	1.0619	0.0339451	2.54581	2.42644
TCGA-EA-A97N-01	1.80297	2.50658	0.301997	3.30236	1.89891	2.42306	1.77628	2.6331	1.75343	4.10388	3.23227	4.60533	2.86836	2.90613	1.80296	2.09155	3.27109	1.56211	2.82485	1.71086	2.18325	1.46035	2.36395	3.26179	1.54432	1.75152	2.5262	4.8991	1.57692	3.62188	4.07953	3.24779	1.90701	3.22461	5.82998	1.87416	3.60914	2.89341	2.44455	3.75367	3.62173	2.00505	1.3189	3.32067	1.63961	1.62463	0.0577582	2.63289	2.70317
TCGA-EK-A2GZ-01	0.610924	2.8387	0.0382701	2.9041	1.65708	1.98607	1.2191	1.55989	2.34031	4.41084	2.43154	4.28646	2.01415	2.55125	1.86054	0.713112	3.05422	1.37581	2.26587	1.95848	2.56596	1.44664	1.14624	1.01658	1.3455	1.187	1.89421	3.73738	2.70187	4.38857	3.0477	3.79801	1.2272	3.27573	6.49885	2.37918	3.60852	1.63216	2.49299	3.07432	2.95137	1.82528	1.07884	2.16678	0.902454	1.73067	0.0190131	2.77513	2.68561
TCGA-EK-A2H0-01	1.3752	1.88452	0.126899	3.25285	2.33359	2.53062	1.24564	2.09886	2.25734	4.2743	3.11457	4.16437	2.61383	2.67884	2.23526	2.31031	3.78986	1.23694	2.97752	1.96327	1.75974	2.32863	2.06341	2.41478	1.11637	2.36605	2.65784	4.65998	0.193599	3.47001	3.50282	4.10201	1.61087	2.76237	4.93785	2.39511	3.81194	2.84708	2.85353	3.99986	3.01852	2.01064	1.23833	2.60377	1.01287	1.32186	0.326647	2.41877	3.20275
TCGA-EK-A2H1-01	1.22935	1.98783	0.0148997	2.83456	1.70426	1.91464	1.04979	1.89195	2.5001	4.7817	2.91033	3.52961	1.43521	2.11998	2.23544	1.54282	3.9842	1.28934	3.03417	2.05368	2.26651	2.68086	1.16741	1.89443	1.35062	2.25158	2.0219	2.46983	2.23548	4.19496	2.7661	3.58999	0.984698	2.69942	5.82745	2.09804	3.57783	2.40628	3.01642	3.02459	2.75935	1.19424	1.11397	2.18247	0.933533	1.11823	0.0999323	2.14644	2.36531
TCGA-EK-A2IP-01	0.702718	1.59396	0.0287439	2.60292	2.42301	2.00595	1.24202	2.48351	2.73381	4.21	2.35552	4.57352	1.49917	2.26223	3.22588	2.4501	3.87821	0.65713	2.52575	2.5441	2.05289	1.96156	1.28083	2.7215	1.37072	1.66003	1.43815	3.10186	2.66259	3.66678	3.78196	3.97148	1.3555	1.88077	6.57528	2.11534	2.4424	3.08111	4.48787	2.77435	2.685	1.57607	1.33461	1.83131	1.26035	0.865213	0.105723	2.03432	1.74294
TCGA-EK-A2IR-01	1.32286	2.10364	0.0684873	2.58555	2.94699	2.91844	0.928707	3.29945	1.69118	5.74107	2.75237	3.75319	0.0251964	3.66877	1.89001	1.24874	4.0449	0.991536	3.77211	1.76418	2.40214	2.89141	2.04056	1.80679	2.40887	2.63269	1.38261	4.85605	2.88954	3.43242	4.32544	3.48296	1.41946	2.8495	5.48449	2.45384	2.92758	2.57639	2.90918	2.99553	2.66857	1.75772	1.26293	2.45807	1.39278	1.02537	0.247549	2.94929	2.04869
TCGA-EK-A2PG-01	0.907179	1.88494	0.0147551	2.77077	1.36737	2.09976	1.56579	1.67915	2.61221	4.96859	1.80765	3.74336	2.41484	2.73427	2.56468	1.06614	3.45949	0.531702	3.06875	2.33994	2.34428	1.49554	1.66153	1.41989	0.918497	1.85715	1.9136	3.19836	2.05072	3.79331	2.8227	4.18309	1.05844	3.05272	6.38915	2.67415	2.98084	2.49175	2.66206	2.97283	1.98557	1.72385	1.73282	2.10969	1.13607	1.4307	0.116818	2.61502	3.41109
TCGA-EK-A2PI-01	1.0994	2.1094	0.0439471	3.29286	2.63051	2.26884	1.02736	2.08564	2.66957	5.46171	2.12972	4.92463	2.48018	2.36989	3.12494	0.66573	3.10716	1.59785	3.33776	2.17362	2.26428	3.84685	2.2817	2.12254	0.808575	1.85069	1.77083	4.96915	2.66414	4.19472	4.60425	4.34082	1.45127	2.83196	5.50129	1.73454	3.05875	1.81379	3.01976	2.36513	2.45533	1.48943	1.22221	2.82459	2.66092	1.32092	0.341555	3.10524	2.55434
TCGA-EK-A2PK-01	1.69031	1.74055	0.016351	3.29058	1.77844	1.77121	1.03538	1.72942	2.07461	5.15585	2.82051	4.00174	2.36838	2.7922	1.74565	1.91433	3.64942	1.11928	2.98814	1.91431	1.72637	0.831998	1.87531	2.02012	0.412468	2.08148	1.95784	3.46997	2.66066	3.32205	3.06932	3.30192	0.793879	2.79884	5.25931	1.67677	3.56951	2.55169	2.61142	3.36928	2.74153	1.52741	0.900727	2.68041	1.00512	1.54385	0.122464	3.10184	2.85339
TCGA-EK-A2PL-01	1.61939	1.57451	0.0325124	2.87604	1.85349	1.96904	0.717131	1.82332	2.35671	5.02824	2.89426	4.43812	2.34332	1.41416	2.03252	1.28734	3.36755	0.793711	2.8877	2.21433	2.71078	2.05763	1.56898	2.10656	0.75984	1.9313	1.72411	3.70045	2.00934	2.74976	3.18613	4.49564	1.17204	2.34826	6.43966	2.04579	2.99078	2.96273	2.99385	2.97585	2.68044	1.71285	1.1848	2.23461	1.54343	1.12401	0.0281212	2.88051	2.42567
TCGA-EK-A2PM-01	0.940404	2.42622	0.135861	2.75143	1.56068	1.12067	2.09921	1.80344	1.37837	6.02989	1.94165	3.41494	1.69288	2.80296	2.73271	0.776015	3.53694	0.762638	3.05348	3.02081	2.49029	2.13611	1.51618	1.08588	0.801095	2.89517	3.76995	4.7693	1.45165	3.78984	3.78821	3.10251	0.859582	3.88483	4.49382	2.27455	4.14217	1.77727	2.42272	3.2056	3.03056	2.53843	1.42022	3.0114	0.898265	1.47269	0.0980915	2.76039	3.26849
TCGA-EK-A2R7-01	1.65155	2.31257	0.0745927	1.78065	2.44723	2.65524	1.15242	2.01254	3.02923	5.18961	3.20002	4.53096	2.69182	2.81774	2.26836	1.46155	4.25156	1.02759	2.8034	2.05201	2.96676	1.73258	1.87881	2.301	0.846315	2.11679	2.2122	3.29662	2.75858	3.8804	3.95842	4.1634	1.4918	2.67882	6.56363	2.01775	3.19211	2.85047	2.70944	3.25835	2.66843	1.4649	1.25305	2.3791	1.58659	1.35939	0.158953	3.4761	3.1546
TCGA-EK-A2R8-01	1.23511	2.3296	0.0326063	3.87797	2.17881	2.62046	1.20705	2.20915	2.28641	5.02884	3.64774	3.43314	2.19227	2.86327	2.02138	1.23848	3.09498	0.931741	2.98963	2.1045	2.46832	1.91984	1.72013	2.74552	1.32152	2.42508	2.44033	2.63908	2.36097	3.99509	3.81039	3.57679	1.30273	3.17115	5.89452	2.24496	4.05359	2.74557	2.68974	3.7766	2.79578	1.84968	1.21794	2.60805	1.20763	1.41108	0.0351679	2.61933	2.80001
TCGA-EK-A2R9-01	0.947888	1.78363	0.0208275	2.47098	2.18031	2.22061	1.25092	2.39256	2.72932	5.24538	2.40398	3.89864	2.3544	2.37738	2.27833	1.11425	3.85824	0.686478	3.35262	1.97932	2.38237	2.55083	1.21908	2.59675	1.32361	2.06919	2.34362	3.46322	2.36955	3.64189	3.57134	4.14646	1.26463	2.73909	6.24736	2.13266	3.79775	1.99894	2.85041	2.9149	2.45419	1.20001	1.43505	2.20506	1.67934	1.25898	0.191973	2.5916	3.00103
TCGA-EK-A2RA-01	1.11479	1.95732	0.107813	3.59336	2.03946	1.92114	0.844089	2.48374	3.18181	5.67447	2.68643	4.96984	2.33068	3.05992	2.08319	1.33378	4.10105	0.90681	3.34393	2.47083	2.75074	1.70608	1.42343	2.5835	0.748022	2.28581	3.25496	4.17398	2.378	3.79502	3.72362	4.73001	1.02163	3.20165	6.96598	2.05968	4.42354	2.35973	2.76726	3.01328	2.83531	1.24668	0.959622	3.04315	1.56292	1.40401	0.0475463	3.64118	3.09836
TCGA-EK-A2RB-01	0.95088	1.81877	0.0138173	2.485	1.86582	2.39788	1.69676	2.03832	2.91643	6.28453	3.15481	4.10834	1.70636	2.61882	2.9533	1.74107	2.92925	0.58555	3.18904	2.24225	2.62402	1.70385	1.1043	1.8638	1.09267	2.37037	1.82803	3.19227	2.07741	4.22413	3.65097	4.12664	1.0446	2.50518	7.1652	2.67111	2.89717	2.5992	2.68514	2.60136	2.32425	1.28614	1.26671	2.14156	1.04762	1.09402	0.164155	2.48781	2.64379
TCGA-EK-A2RC-01	1.3531	1.79628	0.0929405	2.85478	2.09047	2.43274	1.13932	2.2421	2.66413	5.13558	3.01075	3.85694	2.05429	1.99275	2.20345	2.30586	3.61512	0.919605	3.10253	2.47028	2.56511	2.12622	1.89398	1.89341	1.04377	2.44674	1.7008	2.77257	2.20344	3.8725	4.39165	4.23655	1.19012	3.30541	6.44947	1.99366	3.327	2.67154	2.84395	3.2491	2.55631	1.04118	0.696279	2.06075	1.23462	1.61257	0.130985	2.59682	2.75284
TCGA-EK-A2RE-01	1.20264	1.68208	0.10997	3.67649	1.54808	2.35827	0.761561	1.86884	2.14948	4.55877	2.80688	3.33579	2.12627	2.46158	1.33283	1.26431	3.42806	1.15949	2.66975	1.88375	1.89572	1.47553	1.70369	1.78347	1.02682	2.20638	1.52169	3.93558	1.66815	3.70839	3.48994	3.41224	1.17875	3.4957	5.37724	3.01923	2.90854	2.27911	2.16259	3.15377	2.72588	2.17987	1.17939	2.86819	0.633919	1.46787	0.16428	2.3453	2.60871
TCGA-EK-A2RJ-01	1.40319	1.56462	0.0574778	2.94889	1.24758	1.8752	1.33764	0.755087	0.913139	3.76532	2.31979	4.76789	1.29087	2.93318	1.63985	2.01672	3.58571	1.01039	2.91695	1.48827	2.6895	1.12075	1.89535	1.93854	1.3346	1.60409	1.95904	2.13222	2.24768	3.17977	2.53037	3.22725	0.859456	3.23541	4.68793	2.6998	3.46901	2.5084	2.8775	3.4415	2.13757	2.04317	1.19696	3.22156	1.54697	1.12042	0.129091	3.22385	1.986
TCGA-EK-A2RK-01	0.727169	1.45739	0.0481095	2.65274	1.01306	1.3105	0.536266	1.24414	2.4811	5.1648	2.42379	3.61215	0.940023	3.18965	0.666981	0.841224	4.26375	0.849436	2.69941	2.21786	2.45208	2.00907	0.794641	1.69777	0.865496	2.5067	2.26919	4.23097	2.06163	3.56264	2.36477	3.78187	0.75351	2.17134	5.83875	2.2669	3.84514	1.52892	1.95318	3.98831	2.94396	1.16957	1.0453	2.9837	1.01371	0.813454	0.036502	3.14893	2.1947
TCGA-EK-A2RL-01	1.02192	2.64414	0.103774	2.09711	2.52028	3.32482	2.12236	2.30886	3.24038	5.31028	3.01956	4.60108	2.11159	3.17029	2.70527	1.98883	3.55586	1.35819	3.14092	2.28057	2.09183	1.55485	1.85735	2.55125	1.53156	2.61711	2.87217	3.31217	3.18803	3.97392	4.16039	4.32634	1.44787	2.91127	6.64206	2.33229	3.76943	2.10547	3.13469	3.54567	3.60683	1.6088	1.06111	2.65447	1.23876	1.68411	0.180974	3.18145	3.35656
TCGA-EK-A2RM-01	0.942392	2.43291	0.0387218	3.33412	1.83686	1.533	1.03829	1.78724	1.91632	5.61633	2.681	4.7078	2.20047	2.42961	2.11306	0.842282	4.18579	0.869972	2.88154	1.95225	2.88872	2.87393	1.41485	1.73423	0.774754	1.70409	2.36955	2.54865	2.319	3.48075	3.12	4.28819	0.824687	2.46917	6.45353	2.78603	4.02945	2.28988	2.81869	2.68163	2.08028	1.71828	1.00052	2.05712	1.13051	1.11334	0.0759222	2.65356	2.19558
TCGA-EK-A2RN-01	0.583071	1.60551	0.022976	2.57337	1.1976	1.07774	0.533784	1.21517	1.99843	3.09413	1.74669	4.11469	1.12368	1.82753	1.37425	2.56915	3.26932	0.612882	2.66861	1.13403	1.27214	0.463504	0.866918	2.02088	0.589737	1.07065	1.62415	2.06292	1.49462	3.0447	2.34089	3.03377	0.980646	2.37591	6.74258	1.85016	2.30742	2.03476	2.32871	2.14206	2.25158	0.961493	0.717119	1.26668	1.10497	1.48781	0	2.12844	2.46051
TCGA-EK-A2RO-01	0.384724	1.36949	0.0686112	2.30996	1.2218	1.70589	0.798507	1.38431	2.9773	5.79627	2.43582	3.21924	1.35235	2.73035	1.34865	1.02027	3.00531	0.420411	2.68292	2.22478	2.14318	1.1213	1.04848	1.88669	0.923373	1.83619	1.67367	4.28675	1.82918	3.25018	3.27972	3.24406	0.601953	2.32403	6.80192	1.87305	3.50905	1.25138	2.99168	2.71137	2.29649	0.912168	0.744202	1.8945	1.02211	0.912906	0.0374384	2.7049	2.38048
TCGA-EK-A3GJ-01	0.737655	1.61305	0.130631	3.22599	1.99986	2.89153	1.59239	2.10078	2.17679	4.15185	2.57983	4.54522	2.03477	3.0048	2.88296	2.09384	3.46969	1.139	2.43545	1.91476	2.18752	2.32887	1.30146	2.30746	1.04102	2.68467	2.86187	4.52933	1.53942	4.30116	4.1209	4.18178	0.7428	3.35619	6.79954	1.97928	4.15633	2.65605	2.98925	3.60175	2.85745	1.7096	1.49727	2.00944	1.33544	1.5607	0.273236	2.62691	3.02208
TCGA-EK-A3GK-01	1.5873	2.06165	0.126756	3.03842	2.4339	3.15296	1.4194	2.59638	2.08081	4.7915	3.02381	4.81768	2.55491	2.93279	1.86834	1.27159	2.78894	1.33795	3.67981	1.25274	1.70896	1.66677	2.08075	2.62107	1.20174	1.8936	2.91641	3.10426	2.19235	3.86348	3.82738	3.7807	1.43012	2.64417	5.72395	1.95646	3.61078	2.7874	2.78254	3.855	3.35777	1.84292	1.25073	2.10744	0.934187	0.827739	0.384244	3.02365	2.15811
TCGA-EK-A3GN-01	1.25503	2.23777	0.0924896	1.61599	2.36933	2.65915	1.36958	1.61733	2.52077	4.43478	3.47629	6.18116	2.6297	2.93796	2.8383	2.05171	3.08799	1.13994	3.29414	2.1246	2.20789	2.15256	1.78439	2.3447	1.36946	1.89789	3.13039	2.9483	0.0488941	4.22124	3.89239	4.01556	1.20375	3.46469	6.50442	1.89387	3.00594	2.3899	3.00107	3.17277	2.5534	1.61004	1.29232	2.31445	0.623604	1.30119	0.146308	3.98549	3.22831
TCGA-EX-A1H5-01	1.19072	2.25449	0.0617604	2.98376	2.1853	3.14965	1.37018	2.64641	2.75542	5.74302	2.86427	4.79126	2.08293	3.0941	2.56951	0.801528	4.05831	1.2079	3.25872	2.43484	2.97123	2.19796	1.86919	2.34822	1.15358	3.25634	2.59263	4.68048	2.17907	3.94456	4.03076	4.52814	1.64307	2.55688	6.9875	1.62326	3.53892	2.39859	2.50695	3.57591	3.21442	1.41733	1.03217	2.86024	1.16612	1.09675	0.0949011	4.30776	2.81439
TCGA-EX-A1H6-01	1.4399	2.03336	0.0204385	2.47333	1.67596	2.47447	1.10683	1.76594	3.13833	5.03633	2.35546	4.37887	2.49208	1.94911	2.1099	2.26526	3.61398	0.486551	3.3258	2.2272	1.72895	2.16268	1.74967	1.71587	0.740491	1.63426	2.18062	1.36217	2.44814	3.56576	3.2513	4.5295	1.03067	2.32856	6.27163	1.4733	3.01749	2.09515	2.994	3.06286	2.42197	1.36916	1.03024	1.38543	1.27783	1.67627	0.219453	2.13995	2.48193
TCGA-EX-A3L1-01	1.04545	1.80794	0.0480219	3.08025	2.39158	2.58185	1.53113	2.33017	1.30681	4.05899	2.72562	3.19209	1.59554	2.48724	1.53791	0.781274	3.48799	1.06478	3.25703	1.68424	1.47265	2.98845	1.78729	1.83113	1.68314	2.23268	2.16809	3.50802	1.9296	3.49362	4.02428	2.78831	1.13832	3.03059	5.42094	2.30238	3.322	3.17437	2.54444	2.62449	2.54158	1.73394	1.07982	2.3794	0.733022	1.27075	0.0933065	2.28725	2.1168
TCGA-EX-A449-01	2.06021	1.97913	0.101163	1.80955	2.06642	2.87164	1.41898	1.73268	2.58539	6.27625	3.01782	4.6884	2.34611	2.66619	2.07814	2.20213	3.75886	0.934521	3.70063	1.76384	2.13951	2.53896	2.1219	3.38973	1.97736	2.3466	2.62117	3.0242	3.55402	4.33856	3.78071	3.85675	1.4465	3.35949	4.19175	2.44876	4.02542	2.53554	3.47127	2.77579	2.21914	1.58726	0.999217	2.86554	1.74796	1.50009	0.757062	2.68517	2.7518
TCGA-EX-A69L-01	1.05854	1.90482	0.0683592	3.05958	2.14715	2.43837	1.3461	2.08465	2.36822	5.3005	2.49669	4.27458	2.64463	2.22968	1.8541	1.80114	3.46827	1.21824	2.97089	1.35396	2.12493	3.42227	1.51154	2.79631	0.726094	2.1655	2.59969	4.35767	2.30485	4.04338	3.80401	4.10416	1.25404	3.48168	6.12285	1.89374	4.16661	2.12645	2.93841	3.6306	2.88141	1.26151	0.803635	2.66215	1.33356	1.57047	0.0772449	3.03352	3.2785
TCGA-EX-A69M-01	1.18881	2.54403	0.109212	2.88095	2.41706	3.25428	0.986255	2.38261	2.09831	5.48925	2.23254	5.03545	2.30239	2.4253	2.43844	2.19313	2.65424	0.94125	3.35511	1.51905	1.7509	2.30716	2.12763	1.72399	1.03394	2.1242	3.21202	3.5494	1.61343	2.76395	3.70596	3.8264	1.27327	3.42571	5.28244	1.91697	3.66285	1.94431	2.54127	3.55969	2.96619	1.62788	1.63492	2.32011	1.38515	1.52302	0.156955	2.46593	2.95151
TCGA-EX-A8YF-01	2.10213	2.1405	0.0720902	2.21974	2.78453	3.12626	2.63684	2.14941	2.05085	4.9399	2.90925	3.97299	2.7109	2.66536	1.80026	2.19796	3.22059	1.07765	2.7189	1.75564	1.74873	1.56664	3.08248	2.08537	0.751991	1.8892	3.13487	3.17416	2.74143	3.68068	4.66443	3.67621	0.901079	3.48248	3.22287	2.46846	3.52905	2.66775	2.99711	4.08109	2.65514	2.52555	1.46837	2.53944	1.11179	2.17491	0.523035	4.17636	3.62667
TCGA-FU-A23K-01	0.796537	0.919886	0	1.39825	1.6475	1.52941	0.881855	1.44383	3.44632	6.87593	3.23305	2.85869	1.64605	1.92615	1.41284	1.26407	4.34919	0.67969	3.2841	3.62173	2.82898	2.61961	0.698041	2.33197	1.12693	2.09772	2.0483	3.06739	1.58023	3.04251	3.64176	3.3309	0.651574	2.55753	6.79373	2.2335	3.44915	2.38386	2.50761	2.47857	1.56672	0.438289	1.19908	1.88021	0.873906	0.692079	0.0788325	2.76582	2.5981
TCGA-FU-A23L-01	1.51712	2.65488	0.117529	2.71047	2.3974	2.10569	1.22483	2.1697	2.3561	4.53844	2.85266	4.97801	2.63703	2.65947	1.87152	1.55668	3.56862	1.06253	3.05827	1.90877	2.29661	3.1638	2.57857	2.4021	1.45646	1.91401	1.96975	5.42227	2.11616	3.47164	4.23302	4.40782	0.936898	2.77344	5.72738	2.54235	3.45705	2.56229	2.93363	3.92617	2.88278	2.1938	1.61939	3.80629	1.54815	1.59933	0.310213	3.41737	2.4365
TCGA-FU-A2QG-01	1.6066	2.08322	0.183347	3.90103	2.3299	2.77707	1.95247	1.76438	1.95612	4.40729	3.47911	4.08003	2.18762	2.88663	1.9088	1.30695	2.77468	1.54045	3.11716	1.26028	2.08619	1.98846	2.23051	2.06286	1.36398	1.9462	2.81113	4.88986	1.66774	3.71834	3.86957	3.69497	1.60969	2.91568	4.65728	2.1891	3.80511	2.77274	2.57756	3.50841	3.28634	2.10852	1.30505	2.36042	0.704604	1.16841	0.0979076	2.63026	2.37059
TCGA-FU-A3HY-01	1.42505	2.05303	0.0307055	3.2451	2.07829	2.99515	1.9916	2.17403	2.37349	3.7325	3.75466	3.71713	2.58761	2.99949	2.00949	1.09747	3.24195	1.10858	1.76573	1.76193	2.39029	2.1592	1.62814	2.05614	1.49814	1.76567	2.02738	2.93008	1.86964	3.77785	3.93716	4.13781	1.50739	3.41939	5.57648	2.2583	3.1404	2.66512	2.44982	3.64695	3.11032	1.73811	1.44725	1.86628	1.34669	1.18654	0.0344286	3.28685	2.27253
TCGA-FU-A3HZ-01	1.14743	1.34228	0.0771897	1.88758	2.05268	1.95562	1.06639	1.14111	1.99839	5.4867	3.13745	3.5091	3.0364	2.49335	1.86644	1.19183	3.25391	1.19163	3.30006	2.38553	1.6571	1.50314	1.5495	2.15803	0.910239	2.70603	2.50205	3.03115	3.24309	3.23411	3.40276	3.64432	0.89722	3.21992	3.49608	2.73124	3.8368	2.44797	2.85375	3.34897	2.44922	1.92092	1.04702	2.19504	0.855855	1.1216	0.85623	2.54119	3.2146
TCGA-FU-A3NI-01	1.281	2.81303	0.0568685	2.47356	1.83397	2.73574	1.23409	2.53163	1.48589	5.01153	2.72502	3.98963	2.1475	2.55974	2.01204	1.04019	3.26888	1.5187	3.11342	2.19185	1.95007	2.191	2.10542	2.00681	0.916046	2.02433	1.85176	3.69724	0.393961	3.79464	3.58869	3.70145	1.5691	3.52399	5.86545	1.73974	3.39444	2.56892	2.85196	3.60624	3.69256	1.97182	1.16407	3.20212	1.40221	1.60138	0.230954	3.03541	2.57188
TCGA-FU-A3TQ-01	0.959849	1.83453	0.185903	3.43625	1.90271	1.70785	1.11317	1.57399	2.52793	3.69457	2.28169	3.92076	1.38163	2.56003	0.939571	2.0869	3.34212	1.04507	2.3437	1.84196	2.28837	0.886906	1.98516	2.99045	1.06408	2.08854	2.3734	4.08685	2.14865	3.56841	3.59521	3.64308	1.27299	3.98196	6.35175	2.57759	3.33748	1.97515	3.07971	3.40247	2.69765	1.5694	1.29678	3.40632	0.9459	1.69006	0.05453	2.63946	2.90892
TCGA-FU-A3TX-01	1.72703	2.13013	0.0758305	2.41506	2.0622	2.5446	0.78367	2.0274	2.65172	4.90502	3.07005	4.42486	2.2281	2.84884	2.08085	2.12723	3.3293	1.28697	3.24208	2.48874	2.97946	1.72961	2.38759	1.83598	1.4515	2.76601	3.023	3.37501	2.16936	4.10867	4.09248	4.15124	1.00559	3.67742	5.83891	2.62578	4.35293	3.05242	2.81868	3.68298	3.16911	2.45071	1.9814	3.34583	1.33332	1.53179	0.684873	2.7593	2.92023
TCGA-FU-A3WB-01	0.963027	2.45936	0.253788	3.37299	2.61655	3.12621	2.15997	2.80494	2.98439	5.0606	2.68957	4.28533	2.83932	3.15329	2.71018	1.68001	3.21636	1.06757	3.6585	2.22802	2.57404	1.34676	2.0047	3.188	1.2707	2.90376	3.28389	4.23106	1.944	4.57536	4.47326	4.72701	1.66197	3.5141	6.24691	2.39333	4.31609	2.56274	3.0627	3.58082	3.24564	1.8384	1.69536	3.02369	1.79897	1.72594	0.0345304	3.19355	3.46984
TCGA-FU-A3YQ-01	1.84719	2.60893	0.0618816	4.08919	1.91976	2.83233	1.94404	2.33998	2.07372	4.53718	3.35737	3.73189	2.40797	2.86365	1.88115	2.22778	3.22841	1.38388	2.96112	1.46617	2.21909	1.94978	1.91255	2.23341	1.26838	2.4068	1.86552	3.36972	1.94272	3.03219	3.71521	3.6931	1.61203	3.64496	6.60596	2.11327	3.35116	2.77033	2.60228	3.55894	3.17926	1.90578	0.92335	2.67968	1.11629	1.79351	0.112868	2.608	2.92694
TCGA-FU-A40J-01	1.54126	2.48651	0.101423	3.23994	2.06765	2.82186	1.49342	2.37269	2.66422	5.29534	3.15904	4.74247	2.02757	2.88654	1.95255	1.85985	3.41342	1.12444	3.61724	1.84536	1.39354	1.41925	2.51787	1.98838	0.889872	2.57598	2.39052	2.88494	2.72487	4.09705	3.80068	4.30497	1.15135	3.17868	4.17704	1.73348	3.78864	3.24378	3.02395	3.20378	2.63913	1.65625	1.29326	2.80733	0.915927	1.77424	0.302283	2.7017	2.8059
TCGA-FU-A57G-01	1.76796	1.81102	0.0255477	2.96494	1.40203	1.4738	0.825123	0.979303	2.04559	4.76123	2.15919	3.11989	1.66106	2.23077	0.744246	1.10209	3.47368	1.13857	3.47706	2.01219	1.36926	1.93554	1.42896	0.934773	0.318498	1.95546	1.76885	2.03355	2.78217	2.753	2.33036	3.12048	0.895701	3.4426	5.54682	1.99464	3.86774	2.44538	3.21096	3.54466	1.92849	1.94491	1.18557	2.36628	1.75946	1.71413	0.315334	2.51866	3.06377
TCGA-FU-A5XV-01	1.56416	2.06127	0.0254755	3.71564	1.89998	2.02355	1.06719	1.90503	1.66654	4.29248	3.14262	3.37517	2.27861	2.59696	1.22671	1.04684	3.41528	1.2271	2.63467	1.54184	1.57928	2.06694	1.78728	1.91444	1.05497	1.9856	1.66635	4.04609	1.9698	3.48973	3.4285	3.61223	1.49039	3.06214	6.54663	2.23758	2.99516	2.63915	2.33507	3.12252	2.97927	1.98833	0.815984	2.7714	0.696758	1.12912	0.0365278	3.15296	2.47026
TCGA-FU-A770-01	1.70015	1.83477	0.107739	2.9714	2.54317	3.27343	1.68247	2.19601	2.6235	5.61697	3.22161	3.20912	2.35841	2.80501	1.62781	1.43881	3.47009	0.977826	3.64289	2.17564	1.49803	1.30103	1.88217	2.26285	1.23856	2.3777	2.80738	3.21723	1.45976	3.74075	4.10756	3.62201	1.5269	3.18975	5.59664	2.14064	4.23207	2.79531	3.21525	3.80252	1.70378	1.59366	1.07222	2.98385	1.22495	1.69158	0.196736	2.69778	2.78409
TCGA-GH-A9DA-01	0.692427	1.76692	0.0820554	3.12412	2.54298	2.6061	1.15889	2.53032	1.54985	4.17524	3.19713	3.55154	1.40833	2.32262	1.61977	1.34363	3.3541	0.545164	3.34635	2.12771	1.63721	2.69151	1.60497	2.26321	1.00697	2.02317	3.28236	3.75877	1.13533	3.91989	4.46914	2.627	0.745544	3.54014	6.4221	2.01458	4.23372	2.24828	3.1402	2.61566	2.32037	1.66959	1.25987	2.48024	1.10808	1.33431	0.0520803	2.53352	2.6508
TCGA-HG-A2PA-01	1.73404	2.18523	0.0340892	3.87446	1.69194	2.56284	1.09171	2.07856	2.45944	4.95984	2.72638	3.88684	2.29679	1.85873	1.96199	1.39229	2.97582	1.20677	3.03325	2.13091	1.42921	2.02033	1.94029	1.92868	1.15534	1.9441	1.66998	4.37592	1.82231	3.57781	3.50836	3.73157	1.47875	2.92037	5.48797	1.99291	3.30853	2.6663	2.62875	2.93944	2.83719	1.53794	1.08873	4.55644	1.00318	1.39583	0.072618	3.24235	2.34467
TCGA-HM-A3JJ-01	1.36414	1.95856	0.0401314	2.93225	1.49522	2.47011	1.16648	2.07997	1.89807	4.99815	2.76502	3.44849	2.15734	2.78854	1.63438	1.63232	3.41208	1.14824	3.40437	1.95099	2.38493	2.10823	1.80771	2.06992	1.08968	1.34489	2.03722	3.24962	0.627086	3.27116	3.25306	3.70019	1.30122	2.98875	6.73926	2.41219	3.02631	2.84682	2.77381	3.6974	3.12538	1.95129	1.06658	2.6277	0.950072	1.34342	0.194621	3.3431	2.83086
TCGA-HM-A3JK-01	0.939033	1.90623	0.0737119	2.83485	1.96149	2.18326	1.22344	1.60382	2.20728	4.73795	2.9528	4.98524	1.46817	2.9445	1.57998	1.5735	4.22446	0.823368	3.70726	2.74109	2.42968	2.07509	1.77678	2.2788	0.706597	1.908	2.55872	4.28237	2.05571	3.7276	3.95773	3.46528	0.729331	3.08306	7.40649	1.77686	4.08653	2.48103	3.06498	2.48797	2.66728	1.29852	1.19872	2.49116	1.10812	1.04805	0.109996	2.27185	2.62375
TCGA-HM-A4S6-01	1.64398	2.59899	0.157069	3.58374	1.36937	2.40831	1.53983	2.54391	2.26855	3.72182	3.15383	4.59673	2.51406	3.09517	1.95825	1.59526	3.69791	1.23577	2.77383	2.62949	2.47406	1.82506	2.26968	2.95067	1.4863	1.92441	2.46827	3.81705	3.26726	3.85612	3.33349	3.33207	1.41339	3.34116	6.10642	2.42829	3.74601	2.59325	2.93318	3.356	2.9046	1.99806	1.25025	3.08991	1.68347	1.68458	0.101909	2.89593	2.92597
TCGA-HM-A6W2-01	0.805266	1.92266	0.0649669	1.18497	1.7264	1.70941	0.356109	1.27769	1.89782	5.19952	2.55353	5.26865	1.85791	2.18796	1.79772	2.02704	3.63168	0.804472	4.30597	2.90272	1.34881	1.15956	1.30029	1.34026	0.759245	1.32716	2.20579	2.41596	2.73578	3.71029	2.83141	2.6334	0.896398	3.43792	4.12204	2.09649	2.31566	2.2622	3.09605	3.14545	1.58771	1.78994	1.4156	1.84478	1.28871	1.22444	1.33715	2.80629	3.30117
TCGA-HM-A6W2-06	1.58467	2.97324	0.210226	2.17424	2.33645	2.6178	1.4603	1.38902	2.39016	4.78709	2.95017	4.97747	2.95419	3.01386	2.95614	1.86453	2.76669	1.92531	3.64635	2.28862	1.82993	2.56615	3.20569	2.34957	1.63913	1.82222	3.28143	2.82348	2.25851	4.00864	3.83353	2.71822	1.50747	2.86749	3.03949	2.57745	1.63061	3.09897	3.55177	3.32015	2.5734	2.55102	1.9352	3.18255	2.75526	1.50647	0.924795	2.16953	2.73527
TCGA-IR-A3L7-01	1.94703	1.85801	0.0639155	3.2419	2.03994	2.73377	1.35634	3.00348	2.30534	6.26543	3.36479	4.00959	3.08335	3.02592	2.12153	1.77945	3.80688	1.1754	3.72616	1.83617	1.99821	1.59078	2.70439	2.5055	1.57191	2.47216	1.81931	4.40558	1.91323	3.9843	3.82512	4.35698	2.15761	3.38706	6.18528	2.33409	3.15273	3.02256	2.67809	3.64371	3.59127	2.25222	1.54763	3.3706	1.51165	1.6026	0.241123	2.76818	3.22584
TCGA-IR-A3LA-01	1.53731	2.31435	0.101568	2.64722	2.61007	3.03331	1.34495	1.92588	2.25004	4.68572	2.69777	4.01912	3.19848	3.30743	2.32796	1.72943	3.44892	0.987726	3.05161	1.69515	2.21597	1.8647	2.76332	1.904	0.749101	2.08529	3.04619	3.08256	2.47827	3.1004	3.69105	3.39378	1.35523	3.92464	3.65498	1.98458	3.58025	2.88982	3.34439	4.74234	2.51337	2.22085	1.13716	3.22263	1.41996	1.27976	0.894356	2.63604	3.5139
TCGA-IR-A3LB-01	1.22516	1.75533	0.0202587	2.90376	2.18982	2.17392	1.31589	1.97267	2.43988	4.91985	1.8454	4.18778	1.81823	1.98065	1.5055	1.20162	3.21575	0.479527	3.21273	1.55863	1.84842	1.4216	1.1355	1.88127	1.20487	1.65794	2.30634	2.48097	2.21811	3.39999	3.36828	4.52019	1.28066	2.91357	7.23916	2.49907	3.0158	1.93727	3.08109	2.42061	1.76914	1.20142	1.45637	1.98672	0.939006	1.5181	0.485392	2.53069	2.93253
TCGA-IR-A3LC-01	0.821487	2.20261	0.113149	2.50415	2.04899	2.48618	1.54194	2.32569	3.45542	6.22112	2.833	4.67449	2.69613	3.30085	3.00499	1.42138	4.02335	0.883167	3.7983	2.37834	2.25196	2.91977	1.6413	2.69999	1.64547	2.51211	2.45249	4.00304	1.98593	3.83816	3.80279	4.55903	1.3168	3.02846	6.87926	2.12167	3.72295	1.73035	2.79761	2.98142	3.00809	1.95767	1.33163	2.1458	0.898886	1.55518	0.0473645	2.62111	3.36518
TCGA-IR-A3LF-01	2.06052	2.0422	0.192808	2.90724	2.50276	3.04941	2.02009	2.46385	2.60204	5.05912	2.96527	4.72217	2.93357	2.769	2.28738	1.80888	3.08419	0.891657	3.59406	2.04079	2.16483	1.64436	2.29129	2.72692	1.83528	2.31268	2.83905	3.56145	3.03399	4.03025	4.08277	4.44966	1.63929	3.0498	6.23638	2.36783	3.78287	2.99628	3.47914	3.73774	2.6374	2.2598	1.88041	3.11622	2.31041	2.10761	0.504844	2.731	3.33222
TCGA-IR-A3LH-01	1.52469	2.22895	0.136304	3.67099	1.33588	2.35083	0.954886	1.98536	2.33621	4.77006	2.06602	3.84798	2.14439	2.90358	1.83266	1.34783	3.32464	1.13625	3.18272	2.19513	1.98508	1.58115	1.0148	2.01322	0.733986	2.16006	2.31116	4.05346	2.44615	2.62596	2.75663	4.07417	1.01662	3.3922	4.04982	2.66496	3.86161	3.27599	3.29474	3.66771	2.86439	1.46201	1.11965	3.24221	1.22046	1.75412	0.136436	3.13293	2.93215
TCGA-IR-A3LI-01	0.559233	2.00289	0.0192459	1.56754	0.925065	1.4845	0.753487	1.3261	2.7586	5.14179	1.08154	3.7851	2.04591	1.77901	1.18328	0.929066	3.6274	0.635118	3.05832	2.89803	1.14346	1.50829	1.08682	1.50566	0.370121	1.66845	1.55055	1.76628	2.73859	3.06122	2.44268	3.39928	0.57187	2.43606	6.47003	1.8901	2.57142	1.24039	2.46615	2.07919	1.49349	1.0412	0.90418	2.0352	0.757211	1.41392	0.0574064	1.94319	2.41936
TCGA-IR-A3LK-01	0.980603	1.59263	0.0599045	2.71909	2.00317	2.56936	1.29347	2.10497	2.45169	4.11788	3.0426	3.59807	2.06893	2.85726	2.18956	1.04852	3.57533	0.997775	2.20326	1.52991	1.92216	1.66056	1.92959	2.27143	1.0597	2.41397	2.83883	3.62522	1.07293	3.67204	3.76632	3.43293	1.4003	3.03578	6.49199	1.5559	3.56355	2.56625	2.96246	4.15733	2.91981	1.65569	1.1938	2.44271	0.483353	1.38942	0.107417	3.36085	3.22895
TCGA-IR-A3LL-01	0.759566	1.97219	0	2.79946	1.30121	1.6456	1.01628	1.78014	2.78183	4.86915	1.69283	3.76739	2.08689	2.49814	1.22818	1.65325	3.11505	0.442061	2.42205	1.77231	2.1656	1.70649	0.661187	1.41258	0.76706	1.57035	1.10817	2.7413	1.00831	3.369	3.27664	3.54445	0.768975	2.84312	6.05405	2.34225	2.80626	2.02795	2.77674	3.44154	2.32849	1.17171	1.27815	1.51887	0.806861	1.25106	0.158488	2.34014	2.59813
TCGA-JW-A5VG-01	1.50754	1.80577	0.0764571	2.33466	3.21829	2.67321	2.01427	1.82783	2.2467	4.0662	3.43338	3.94418	2.15942	2.71444	2.36864	2.01107	2.77358	1.14385	3.47024	2.31118	2.44784	2.94055	2.76065	2.09768	1.30631	2.71655	3.0638	3.2604	2.33771	3.87498	4.76773	3.57481	1.66674	3.35205	5.59656	2.28796	3.63525	3.0583	2.86249	3.28953	2.63993	1.75652	1.0954	2.41033	1.59149	1.47284	0.282396	3.90476	3.05373
TCGA-JW-A5VH-01	1.66404	1.93639	0.0910707	2.02359	2.39832	2.20272	1.23371	2.01521	2.2644	5.64961	3.16583	4.55785	3.26556	2.58798	2.20081	2.1371	3.45601	1.38963	3.44975	2.48192	1.78308	1.55197	2.31315	2.39335	0.965067	2.34162	2.91846	3.13027	3.0747	3.87238	3.8336	3.59338	1.19371	3.38369	4.38496	2.30271	2.91284	3.07786	3.20748	3.22659	2.33811	1.78392	1.68699	2.663	2.14399	1.59012	0.298905	2.57725	3.58698
TCGA-JW-A5VI-01	1.38205	1.95645	0.0484761	3.77548	2.26215	2.32553	2.01552	2.68206	2.09248	3.46059	3.05501	3.78878	2.55965	3.0525	2.71683	1.62444	2.63937	1.13065	2.6615	2.55307	2.5198	1.57987	2.13741	2.7056	1.17882	2.93096	2.16463	4.54894	1.80357	3.74072	4.14026	3.86902	1.4938	3.67047	5.3599	2.23417	3.23803	2.96139	3.2115	3.24572	3.315	2.05319	1.19988	2.7434	0.939779	1.24117	0.0760179	3.87563	2.45146
TCGA-JW-A5VJ-01	1.02878	2.01149	0.0227391	2.9718	2.00566	1.88432	1.58129	1.35355	1.9383	5.34095	2.7076	4.99652	2.02247	2.45915	2.27429	2.99153	3.36137	1.20694	3.46825	2.5321	2.29381	2.27857	2.15991	2.49859	0.849403	1.69416	2.09585	2.52332	1.48705	3.74243	3.72781	4.36933	1.11884	3.61332	6.24443	2.84218	2.8774	2.43587	2.75939	2.4899	3.04937	2.10479	1.67116	1.95519	1.63614	1.3512	0.261756	2.37302	2.9278
TCGA-JW-A5VK-01	0.507491	1.79599	0.0322073	1.78885	2.09477	2.52144	1.02604	1.24516	3.86695	6.90166	2.34322	4.11903	1.74153	2.66107	3.01496	1.01335	3.22685	0.619205	3.31897	3.14287	3.14862	2.45585	1.30648	2.19575	0.91362	2.52459	2.84326	4.56722	1.08976	4.41034	3.73796	3.69157	0.649711	2.19952	5.85177	1.92676	4.32484	1.60685	3.03723	1.78335	2.51827	1.93018	1.5959	2.23578	0.893969	0.867567	0.00701482	2.36672	2.55513
TCGA-JW-A5VL-01	1.09672	1.98112	0.0304354	3.3301	2.00787	2.66495	1.44368	1.91405	1.87464	3.75125	3.42658	4.13422	1.54787	3.13352	2.21123	2.00429	3.23279	1.09942	2.30056	2.2585	2.35726	2.14953	1.49515	2.20543	0.939258	2.95029	2.94694	4.36314	1.30903	4.45498	4.82965	3.55811	1.32582	3.11225	5.55628	2.03762	3.64809	2.77357	3.33713	3.35252	2.57897	1.71568	0.934825	2.1304	1.15152	1.09353	0.0680972	2.69747	2.78942
TCGA-JW-A69B-01	0.965871	1.8102	0.0378812	2.23419	1.5169	2.97564	1.50066	1.97265	3.25968	5.63169	2.37906	3.81883	2.17193	2.55159	2.53771	1.6138	3.43815	0.725567	3.4255	2.18961	2.24949	1.66473	1.1795	2.69567	0.82205	2.47146	2.58854	2.33185	2.54628	3.7784	3.32143	4.03045	1.28706	3.18264	5.62983	2.73153	4.00312	2.63916	3.16285	3.07844	2.59355	1.8401	1.5595	2.64565	0.2458	1.41198	0.0515526	2.43018	3.10667
TCGA-JW-A852-01	0.433353	0.955015	0.0229907	1.59764	0.983269	1.7304	1.05811	1.52603	3.00944	6.86428	2.49115	3.61398	1.14459	1.70629	1.53313	1.10248	3.93966	0.497211	3.65403	3.9827	2.41343	2.44953	0.802063	1.68564	0.63974	2.5798	1.94045	4.09719	1.65317	3.9087	3.27433	2.93338	0.406768	2.10065	5.24144	1.76453	3.53593	1.66116	2.7881	1.80605	1.61039	0.713269	0.50701	1.64064	0.457554	0.515398	0.156333	2.07372	1.76073
TCGA-JW-AAVH-01	1.60864	2.40972	0.119227	3.31132	2.07565	2.80658	1.05555	2.53048	3.00108	5.15121	3.42072	4.61273	2.49608	3.03331	2.56014	2.3002	3.46362	1.05714	3.41973	1.85525	2.09841	1.03602	2.14152	2.35766	1.5427	2.19976	2.40594	4.02221	1.96095	4.09544	3.9195	4.65898	1.46223	3.31761	6.72169	2.02759	3.23733	3.24913	2.95644	3.12338	2.88826	1.98165	1.21828	2.80266	1.20578	1.9299	0.086787	3.22971	3.03761
TCGA-JX-A3PZ-01	0.564942	1.35021	0.0443965	3.39366	1.62831	1.79497	0.612764	1.41158	2.17793	5.12809	2.14789	3.75351	1.90332	2.43378	1.68682	1.06928	3.61312	0.70502	3.30791	2.37271	1.68384	2.34172	1.39753	2.15019	0.64316	1.48191	1.78312	3.75459	1.06362	3.60319	3.15853	3.02156	0.80782	2.82526	5.52479	1.94716	3.74201	2.00867	3.27353	3.16768	2.49814	1.77863	1.34992	1.23206	0.676029	1.22229	0.0572552	2.34435	2.7223
TCGA-JX-A3Q0-01	1.36371	2.20809	0.116878	2.85439	1.52687	2.75477	1.35224	1.84042	2.397	4.32747	2.88443	4.06434	2.22451	3.23664	1.88796	2.18679	3.779	1.34491	2.90174	2.03479	2.7533	1.75916	1.8436	2.83532	1.42762	1.97096	2.96273	3.30171	1.89313	3.63055	3.67666	3.52968	1.22354	3.01631	7.44992	1.98222	4.17124	2.55306	2.59028	3.50264	3.28256	1.81909	1.07766	2.9935	1.01781	1.3077	0.128787	2.28921	2.62248
TCGA-JX-A3Q8-01	1.14052	1.46314	0.0420196	2.81153	1.59119	2.62133	0.941555	2.17513	2.78508	6.20388	2.96139	4.12508	2.02511	2.74368	2.11945	1.16552	3.00542	0.568858	3.53574	2.27524	1.08107	1.03465	0.801049	1.79188	1.34051	1.91889	2.01653	3.94576	1.54195	3.242	2.9636	3.77158	1.22536	2.897	5.77333	1.83802	3.31946	2.50306	3.04202	3.08319	2.15127	0.726878	0.671481	2.07231	1.1363	1.4363	0.112132	2.96185	3.15783
TCGA-JX-A5QV-01	0.931583	2.50168	0.127007	2.51216	2.10862	2.69538	1.21306	1.99535	2.69886	5.30099	2.63284	4.22633	1.973	2.80655	2.01753	1.68458	3.74165	0.914489	3.40971	2.30632	2.032	2.46256	1.71887	1.81687	1.22014	1.86067	1.92705	3.87252	1.9253	4.10513	3.77974	4.12318	1.09115	3.20176	5.61182	2.0424	3.61018	2.03625	2.53321	2.95635	3.14229	0.96805	1.40338	1.73239	0.906635	1.63039	0.570267	2.8224	2.75051
TCGA-LP-A4AU-01	1.31105	2.24539	0.0805655	3.20191	1.98651	2.27872	0.915682	1.82196	1.65174	5.3829	2.482	3.76479	2.14681	2.15254	1.79185	1.88984	2.78795	0.966965	3.10294	1.82516	1.73797	1.95737	1.94474	2.46604	0.862013	1.85524	2.3886	2.77422	2.28381	3.48873	3.2865	3.10303	0.999312	3.19666	4.94565	2.154	3.70816	1.87634	2.89721	3.7217	2.48785	1.61813	1.10053	2.96359	1.42514	1.40594	0.188757	2.17945	2.52053
TCGA-LP-A4AW-01	1.52954	2.15982	0.0619238	2.71899	1.69243	2.18594	0.530287	1.24313	2.15684	5.75321	2.90891	3.6805	1.56421	1.92572	1.93189	1.5637	3.16418	0.960256	3.58803	2.3722	2.34002	2.29998	1.8399	2.14261	1.06455	2.06668	2.15805	3.65412	2.44177	3.6185	3.50326	3.53175	1.2843	2.79032	6.03585	2.14749	3.82422	2.42886	3.11303	4.04529	2.52084	1.95472	1.51763	2.23257	1.18992	1.34056	0.105344	2.91906	2.4449
TCGA-LP-A4AX-01	1.53213	2.15199	0.0540771	3.83829	2.20772	2.77927	1.39906	2.37691	1.61588	4.74421	2.50284	3.97951	2.19254	2.86838	2.95272	1.77633	2.93809	1.28984	3.74172	2.20893	2.64745	2.8448	2.12138	2.49918	1.24516	1.91514	2.18316	4.16769	1.27493	4.41773	3.72636	3.69871	1.49086	3.45716	4.28648	2.04754	3.47465	2.03106	3.18542	4.08802	2.90635	2.42255	2.02134	3.31884	1.19921	1.61425	0.232445	2.92501	3.10527
TCGA-LP-A5U2-01	1.28289	2.38602	0.0810122	2.68483	2.49535	2.49355	1.46329	2.01566	2.67397	5.78427	3.05107	3.97052	2.63019	3.05687	2.06562	1.31522	3.38386	0.819524	3.55645	2.88482	2.40996	2.54719	2.37599	2.36283	0.956351	2.49483	2.48882	3.77821	3.00505	3.62578	3.90118	4.26388	0.887928	3.15722	4.61729	1.98375	4.11651	2.99685	3.02544	3.65169	2.96554	2.00849	1.32437	2.31041	0.975121	1.50162	0.0770663	3.02924	3.19073
TCGA-LP-A5U3-01	0.896964	2.2985	0.0651781	3.43673	2.12543	2.79599	1.94596	2.51883	2.15557	3.96395	2.86023	3.96586	2.89113	3.00527	1.84406	0.972127	2.89028	1.27535	2.1665	1.83477	2.33077	1.96095	2.23844	2.31274	1.85753	1.51589	2.85213	4.35815	1.25674	3.9808	4.06763	4.21962	2.01954	2.70684	6.05293	2.25311	3.87806	1.91086	3.48311	3.64141	3.44299	1.78108	1.39427	2.63634	1.33521	1.79784	0.0178824	3.01982	3.19965
TCGA-LP-A7HU-01	1.3733	2.04072	0.0657656	1.63022	2.75656	1.69085	1.52727	2.29202	2.57442	5.21107	3.11303	3.91157	2.54089	2.75024	2.01246	1.30414	4.13495	0.535065	3.96122	2.77795	3.1856	1.23027	2.09571	2.37294	1.48717	2.84503	2.94541	3.49579	2.39981	4.14271	3.82994	4.55626	0.965142	3.08886	5.48934	2.00172	4.32873	3.06324	2.93829	2.48472	2.03158	1.24577	1.39936	2.27699	0.926504	1.0639	0.236805	2.80702	3.39186
TCGA-MA-AA3W-01	1.61552	1.9091	0.167417	3.67295	2.031	2.67085	1.7808	2.62667	2.08177	5.25662	3.26627	4.18439	2.53738	2.92763	1.83056	1.47032	3.52562	1.05535	3.10872	1.80015	1.99766	2.68995	2.24136	2.33132	1.2425	2.09719	3.19716	4.23129	0.712604	3.98582	4.30057	3.6617	1.52076	2.8429	6.38623	2.23719	4.27284	2.95551	3.04809	3.70815	2.82373	1.74337	1.3251	2.94375	0.989904	1.68988	0.0617847	3.13694	2.97846
TCGA-MA-AA3X-01	0.968909	2.07716	0.101512	3.45653	1.21543	1.79389	0.90267	1.11003	1.89981	4.70657	2.42213	4.12992	1.96033	3.40376	0.774836	1.03711	3.38822	1.36447	2.3299	2.07802	2.21282	1.1867	1.34741	2.19568	1.32087	1.50177	2.14161	3.36211	1.33139	2.97443	2.85922	3.02591	1.2272	4.01201	5.42169	2.3563	3.28377	2.22504	2.0633	2.08683	3.25059	1.75227	0.8505	2.44628	0.588706	1.54451	0.0286134	2.72183	3.02125
TCGA-MA-AA3Y-01	1.17628	1.73633	0.0577496	4.88213	1.95366	2.39346	1.42492	2.24235	1.22706	4.62655	3.22806	3.35264	1.98553	2.8778	1.52907	1.56966	3.53278	1.06242	3.17018	1.95427	2.19423	2.45667	1.84228	1.76862	1.22614	1.94419	2.54978	3.67307	1.81548	3.33748	3.72186	2.75814	1.19434	3.43291	5.36713	2.24633	3.83407	2.11191	2.85686	3.88639	3.13961	2.09833	1.00347	2.78347	1.06161	1.37237	0.0622444	3.3372	2.65996
TCGA-MA-AA3Z-01	1.43167	1.82693	0.0426194	3.52421	2.1068	1.98491	1.71303	2.29913	2.17197	5.08766	3.03465	3.97344	2.73452	2.73227	2.07612	0.901564	2.84044	1.05942	3.26549	2.03392	2.59963	1.96918	2.15104	2.5481	1.26252	2.23804	2.56164	4.59165	2.44907	4.21387	4.02147	3.79692	1.46716	2.70002	6.33054	1.85379	4.11401	2.60791	3.15669	3.53091	3.17864	2.16532	1.49404	2.84621	1.50006	1.20224	0.0639351	3.41393	2.3685
TCGA-MA-AA41-01	0.958838	2.08862	0.100721	2.84509	1.65127	2.54668	1.60035	2.52636	1.55003	4.47066	3.27585	4.88746	2.18721	2.7421	2.35758	1.95499	3.0071	0.729449	2.35442	2.48016	2.2853	2.0432	2.20337	2.26972	1.10114	2.26649	2.8215	3.97658	1.04094	4.28016	3.50838	4.08755	1.23803	3.28272	6.09629	1.45797	3.94852	2.28583	2.9267	3.6042	2.73958	1.77959	1.56861	2.94693	1.19904	1.30914	0.173426	2.48866	2.86003
TCGA-MA-AA42-01	1.17057	2.02301	0.0100743	2.71068	1.08151	2.05609	0.662205	1.46926	2.68126	5.24348	2.66452	3.93345	1.81937	2.42018	1.8884	0.886556	3.71476	0.951146	3.11914	2.40359	2.40544	2.04238	1.21187	1.8911	1.39782	1.98181	1.65152	3.59645	2.46192	3.64837	2.62699	3.75436	0.654309	3.33791	5.91549	2.42296	2.52172	2.23851	2.99404	3.37542	2.42238	1.3195	0.99114	1.9403	1.017	1.77926	0.0472378	3.00358	3.11566
TCGA-MA-AA43-01	1.62398	1.39322	0.0499672	3.05233	2.10438	2.21404	1.03667	2.29172	1.86196	5.32741	3.05378	3.60564	1.72381	2.67529	2.07594	1.37141	4.39403	0.994951	3.74839	2.4714	2.40506	2.05586	1.9192	2.00973	0.884907	1.93789	2.27579	3.28063	2.43148	3.53857	3.68639	2.88864	1.39778	3.69554	5.03166	2.13253	3.74683	2.23438	3.15257	2.96132	2.40333	1.88619	1.24373	2.37505	1.63067	1.12055	0.152632	3.25019	2.97284
TCGA-MU-A51Y-01	1.23625	2.12827	0.176396	3.56644	1.6219	2.74774	1.7013	2.75023	2.05099	3.83037	1.86697	3.59214	2.38782	2.86351	1.92768	1.381	3.105	1.13532	2.61184	1.94019	2.31538	1.92904	1.96821	2.121	0.768651	1.73155	2.14123	3.72105	2.44548	3.51909	3.60431	3.54944	1.1578	3.85947	5.89317	2.05324	3.99459	1.57942	3.16456	3.14853	3.30048	2.09472	1.36712	2.80226	1.46657	1.44176	0.221615	2.5617	2.88055
TCGA-MU-A5YI-01	1.2735	2.15227	0.0686726	3.88248	1.58067	2.27871	1.37344	2.01284	2.30029	5.06778	2.39841	3.97912	2.24922	2.47066	1.19478	1.42966	3.41356	0.840048	3.06643	1.8885	1.81572	2.21734	1.71932	1.49019	1.22244	1.90598	1.1847	4.28212	2.5175	3.7978	3.42738	4.00094	1.27523	3.49717	6.92017	2.32423	3.17935	2.21202	2.7503	3.4204	2.90796	1.51775	1.50776	3.06708	1.64525	1.7688	0.130576	2.95146	3.14095
TCGA-MU-A8JM-01	0.938444	2.6571	0.0677095	3.63916	1.13816	2.17659	1.01304	1.84871	1.83561	4.07443	3.18879	3.41436	1.50688	2.44987	1.16536	1.62133	3.18215	0.487359	2.85475	1.75805	1.74453	1.12897	0.797901	2.38145	1.22984	1.83107	1.97917	4.07637	1.0738	3.58714	3.39053	3.30961	1.03191	3.00738	6.75294	1.94841	3.69816	2.25715	2.56674	2.68943	2.59985	1.11255	1.12996	1.83775	0.646825	1.13775	0.00663684	2.75061	2.4735
TCGA-MY-A5BD-01	0.778579	1.41627	0.0570782	2.70063	1.98337	2.61254	1.65562	2.09589	3.17738	5.69192	2.70465	3.91964	2.34631	2.63276	1.95847	0.895397	2.82472	0.590992	3.34662	2.17667	1.71384	2.10819	1.1245	2.1621	1.0718	2.4641	2.511	3.95548	2.64211	3.88993	3.89171	4.52571	1.21338	3.29601	6.67824	1.88769	4.03531	2.14534	3.1377	3.49847	2.34124	1.48268	1.40469	2.40288	1.48516	1.67223	0.213804	2.90359	2.93918
TCGA-MY-A5BE-01	1.99045	2.23603	0	2.70589	2.25723	2.29264	1.55535	1.98157	3.01104	5.29183	1.98425	4.01975	1.82949	2.72262	1.2765	1.49952	4.02166	1.03977	3.13593	2.76648	2.67928	1.75666	1.34006	1.97466	1.02422	2.89957	2.17137	3.64235	2.08549	4.19042	3.82053	4.38711	0.864318	3.10277	5.23113	2.17283	3.98742	2.14283	3.2508	3.27057	2.46141	1.24984	0.906691	2.44372	1.0204	1.35421	0.270565	2.63525	3.03338
TCGA-MY-A5BF-01	0.853126	2.00742	0.119774	3.45225	1.91305	1.69659	1.24731	2.0762	2.49139	4.68792	2.56777	3.84034	1.99121	3.07816	1.10115	1.13324	3.00106	0.783475	2.92955	2.10216	2.26598	2.19206	1.38635	1.57928	1.26173	1.67882	2.30217	4.23435	0.707163	4.01297	4.1159	4.07577	1.4129	3.5121	6.71003	3.10357	3.83456	1.86534	2.74406	4.10021	2.81037	1.8088	1.58155	2.26907	0.967563	1.68247	0.111163	3.16077	3.03161
TCGA-MY-A913-01	1.20179	1.705	0.0884425	4.24255	1.87072	2.81243	1.59016	2.52414	1.706	4.32683	3.0833	3.49455	2.25711	2.64116	2.59562	1.48804	3.60231	1.5666	3.56194	1.84102	2.37297	1.93457	1.55706	2.36494	1.23904	2.28248	2.54154	4.44655	2.39918	4.476	3.60618	3.47824	1.77604	3.19989	5.5258	2.0661	3.44974	2.8457	3.00619	3.75737	2.77535	2.46252	1.60299	3.42428	1.43233	1.36521	0.0356588	2.38511	2.52495
TCGA-PN-A8MA-01	1.43306	1.94088	0.167452	2.38646	2.07605	2.92817	2.14277	2.36123	3.38763	5.55759	2.34948	4.89659	2.81331	3.27876	2.73959	2.11065	3.73077	1.89157	3.42097	2.1151	2.30787	0.797552	1.7756	3.44319	1.12346	2.35569	2.91673	3.54353	3.24245	3.88344	3.86181	4.32649	1.69743	3.42695	6.54811	1.81297	4.18537	2.65437	2.99513	3.18719	3.43407	1.43878	1.41218	2.63123	2.18669	1.53905	0.354142	3.35356	3.69998
TCGA-Q1-A5R1-01	1.64922	1.83445	0.0976188	2.53376	1.60478	2.62916	1.27196	1.9473	2.79054	4.80414	3.04621	4.04259	2.44486	2.89745	1.63761	1.84034	3.40001	1.02473	3.67619	2.19106	1.7542	1.45322	1.76567	2.26582	1.04259	2.16095	2.32849	3.07548	2.42449	3.90018	3.19908	3.97258	1.23131	3.15199	6.4917	1.85847	3.67533	2.65187	3.05554	3.42341	2.31405	1.4929	0.923365	2.41461	1.63554	1.83948	0.214392	2.63353	3.11908
TCGA-Q1-A5R2-01	0.380384	1.81053	0	2.03333	1.40774	2.19115	0.910198	1.43657	2.8992	6.03551	2.13644	3.61329	1.39557	2.97806	2.01736	0.993639	3.93836	0.645155	3.63231	2.45731	2.45855	2.58442	1.35034	1.69537	0.643798	1.86699	1.9282	3.85019	1.71571	3.81647	3.41284	3.65491	0.692091	2.34888	6.25104	2.18755	3.19256	1.65607	2.82677	2.35749	2.14146	1.56074	0.600033	1.99593	0.449533	0.702644	0.0355036	2.69823	2.51429
TCGA-Q1-A5R3-01	0.299075	0.805203	0	0.902323	1.03651	1.7259	0.527525	1.35552	2.47658	5.78009	2.00242	3.02164	0.782363	1.21122	1.18562	0.860986	4.55808	0.185973	3.48105	3.25981	1.73928	3.03736	1.1888	0.858117	0.688871	1.51244	1.74782	2.87091	1.5225	3.34915	3.04368	3.29042	0.189953	1.23518	5.23642	1.42504	2.59953	1.31741	2.49396	1.08012	0.470212	1.04734	0.301231	1.24965	0.311975	0.213872	0.121598	3.10366	0.902717
TCGA-Q1-A6DT-01	0.916219	2.38361	0.029311	3.44806	1.6092	2.32077	1.25487	1.55771	1.63164	5.19407	2.61595	4.82575	1.87684	2.57285	2.56643	1.7837	2.51412	1.29627	3.41964	1.68854	2.81444	2.90022	2.07296	1.38508	1.52968	2.60878	2.47869	3.99795	1.99523	3.6321	3.79608	2.88612	1.53824	3.11377	5.536	3.06087	3.72379	2.01142	3.272	2.98577	2.39168	2.34312	1.61541	2.64566	1.34423	1.18595	0.130319	2.9955	2.55475
TCGA-Q1-A6DV-01	1.94781	2.10483	0.132024	2.86601	2.15989	3.6134	1.91675	2.55405	2.85731	5.34055	3.76455	4.21483	2.69562	3.16872	1.94455	1.8026	3.36762	1.34423	3.39582	2.14907	1.78384	1.16787	1.96283	3.05623	1.19263	2.76923	3.27651	3.52654	2.66169	4.0515	4.16031	4.44766	1.47895	3.41368	6.72442	1.95172	4.37057	3.1322	3.42639	3.54457	2.68214	1.67431	1.43232	2.74963	1.89687	1.86676	0.201638	3.0186	3.27225
TCGA-Q1-A6DW-01	1.05226	2.96349	0.116322	2.90239	2.09346	2.67004	1.76473	2.28322	2.65082	4.66841	2.52564	4.51808	2.5846	3.07833	1.38041	1.2029	2.64112	1.07851	3.06266	1.66742	2.02265	1.69633	1.99821	2.8168	2.25849	2.40411	2.53453	4.07966	1.64775	3.92221	4.33571	3.63468	1.3439	4.29448	5.31574	2.40918	3.39386	2.30789	3.02687	4.26025	3.26397	1.6566	1.27748	2.46005	0.803123	2.07801	0.0547446	3.24394	2.94817
TCGA-Q1-A73O-01	1.37696	2.72863	0.0886543	4.09345	1.65588	2.38137	1.54744	2.23886	1.53475	3.59879	2.81864	4.07286	2.14533	2.84974	1.9731	0.98796	2.92978	1.36912	1.93254	1.55955	1.62843	1.86012	2.34499	2.05379	1.14624	1.94231	2.59879	4.38591	1.72067	3.53389	3.90385	3.07718	1.40848	3.54867	6.07593	2.16437	3.91166	2.64213	2.64404	3.15764	2.91259	2.03317	1.25265	2.77215	1.36579	1.3134	0.0883519	2.33842	2.81998
TCGA-Q1-A73P-01	1.3596	1.79292	0.115997	2.79652	1.76611	2.7189	1.56125	2.1312	2.35503	5.03228	2.1161	3.81133	2.79634	2.71401	1.59534	1.36817	3.27581	0.880774	3.30204	1.80228	1.63765	1.61121	2.21832	2.67351	0.877522	2.37103	2.79544	3.02281	2.63836	3.80998	3.8782	3.7512	1.24796	3.24544	5.74705	1.88819	3.93641	1.98692	3.05315	3.82005	2.90077	1.65667	1.15272	2.57034	0.900981	1.85647	0.107648	2.81154	2.94523
TCGA-Q1-A73Q-01	1.19867	2.02154	0.0654839	3.53049	2.82725	2.72264	1.24682	3.38299	2.56296	6.04549	2.711	4.74053	3.19142	3.09213	2.52617	1.3153	3.41818	1.37993	3.18138	1.9051	2.02179	1.60039	2.33604	3.03941	1.40655	2.61904	2.27373	5.37146	1.40744	4.28359	4.6448	4.68332	1.7229	3.60448	5.01338	2.05327	3.42117	2.42395	3.42244	3.5251	3.21834	1.90818	1.41098	3.67051	1.2368	2.01305	0.152787	2.9191	3.29371
TCGA-Q1-A73R-01	2.10862	1.97086	0.154339	4.06844	2.29138	3.19865	1.41597	2.57366	2.23839	4.49449	3.39684	4.2608	2.80683	2.82182	2.58885	1.82749	3.39628	1.19961	3.46951	2.24728	2.30196	0.953475	2.57368	3.24239	1.41153	3.20679	3.20192	3.09215	2.90087	4.45455	4.20641	4.46255	1.66754	3.71381	6.69208	2.17673	3.74228	2.89799	3.62245	3.59837	2.71735	2.0241	1.20798	3.19262	1.7086	1.63832	0.0806069	3.24713	3.23043
TCGA-Q1-A73S-01	1.01643	0.941669	0.0335529	1.20026	2.85259	2.21574	0.951004	1.25152	2.7728	6.43836	3.48488	3.73777	2.59509	2.62375	1.75429	1.08169	3.95466	0.74048	3.14864	2.79262	3.15022	1.68436	1.26906	2.41765	1.03508	2.43709	2.12069	3.47053	2.61805	3.284	4.16782	3.74676	0.88931	2.69521	5.99115	2.75156	3.385	2.59294	3.38546	3.30915	2.15506	1.6656	1.19807	2.23517	1.37005	0.955412	0.0527699	2.68309	3.06502
TCGA-R2-A69V-01	1.18245	1.60472	0.0348419	2.75309	1.80245	1.53511	0.591571	0.918913	2.21893	5.13356	1.89912	3.99905	1.59442	2.60117	1.41016	1.71047	3.65202	0.860465	2.69935	2.14385	2.34501	2.47751	0.925318	1.33701	0.700692	1.62968	1.67004	3.16289	1.64699	3.18757	3.25487	3.07613	0.689517	2.6653	3.98741	2.50327	3.22066	1.32079	2.75271	3.46344	2.33678	1.51082	1.18117	1.34624	0.935182	0.964792	0.107562	2.49504	2.74747
TCGA-RA-A741-01	1.0168	1.68504	0.0544225	2.58718	1.28224	1.6308	0.808933	1.21115	2.21899	5.34809	1.71662	4.0339	2.00332	2.02764	1.22078	1.49468	3.44718	0.835744	3.36093	2.39372	2.21568	2.56062	1.58245	1.81545	0.540499	1.75759	1.8148	3.33677	1.67433	3.56277	2.89528	3.32829	0.780258	3.01572	5.55106	1.87561	3.44137	1.58672	2.97586	3.20735	2.64857	1.87586	1.19449	2.28941	0.861866	0.970886	0.0927498	2.58885	2.89547
TCGA-UC-A7PD-01	0.73804	1.60845	0.118994	3.07917	1.80493	2.34406	1.84749	1.72271	1.84535	4.95509	2.17449	3.92794	1.57005	2.68967	2.27517	1.79838	3.31147	1.03429	3.30717	2.61862	1.93438	2.88095	1.96237	2.8746	1.09444	2.13299	2.45112	4.21479	1.85548	4.17078	3.45041	3.19792	1.17296	2.85867	5.23294	1.69678	3.45641	1.69125	2.85732	2.61985	2.39925	1.81948	1.32342	2.41398	0.612253	1.09455	0.15876	2.43609	2.5041
TCGA-UC-A7PF-01	1.36776	2.5659	0.0971475	3.24175	1.51301	2.26759	1.44964	2.56565	1.97746	5.09355	2.15009	4.48345	2.3244	2.82913	1.57244	1.65746	3.02995	1.27126	3.33694	2.14297	1.8388	2.57571	1.84129	2.29699	1.26818	1.96456	1.94677	4.43023	2.11232	3.64488	3.9467	4.02845	1.07021	3.56754	5.97057	2.01082	3.00046	1.86863	2.88082	3.29574	3.29295	1.46685	1.37436	2.68819	0.841583	1.71829	0.128614	2.44218	2.69551
TCGA-UC-A7PG-01	1.08764	2.22333	0.135037	3.22283	1.31062	1.85127	0.735353	1.38861	1.39929	4.47601	1.95334	4.38968	1.64005	2.31063	1.29551	1.81012	3.51683	0.980784	3.07046	1.67331	1.62607	1.75406	2.33929	2.29151	1.12376	1.4498	1.74996	3.18462	1.3686	3.3775	3.41397	2.87943	0.970104	3.6963	5.45985	2.45121	2.79465	2.3581	2.61272	2.5294	2.60296	1.55628	1.34925	2.93306	1.39814	1.64244	0.080417	2.47707	2.59645
TCGA-UC-A7PG-06	1.19867	2.11999	0.156507	2.69671	1.89261	2.12383	0.841189	1.99523	2.54682	5.03653	2.44611	4.74952	1.98049	3.1448	2.06578	2.17813	4.09652	1.04122	3.07453	2.30927	2.36316	1.98341	2.22199	3.09034	1.28189	1.58403	2.40581	3.83274	1.79382	3.75958	4.01483	3.48018	1.09811	3.32798	6.79507	2.64642	3.19673	2.7633	2.98185	2.70948	3.05319	1.68224	1.46398	2.85469	1.45227	1.5191	0.0729085	3.05495	3.08624
TCGA-UC-A7PI-01	2.11371	1.96528	0.112013	2.87788	2.07005	3.69274	1.99092	2.61126	2.56827	5.80488	3.21264	4.24279	2.01087	2.88987	2.14797	1.93739	3.63499	0.885722	3.88826	2.31784	1.89124	1.3297	2.26377	3.32861	1.11911	2.62382	2.90848	3.36205	3.02235	3.94248	3.89495	4.07166	1.48217	3.17348	6.00029	2.31125	4.03463	2.89604	3.49528	3.44509	2.79191	1.83962	1.28827	2.63677	1.9434	1.69525	0.265079	3.27603	3.00232
TCGA-VS-A8EB-01	0.830068	2.22443	0.0160457	3.05287	1.97188	2.40767	1.19517	3.61721	2.32162	4.06886	2.82627	4.63641	2.34292	2.87594	2.06576	0.908437	3.83971	0.758716	2.43244	2.34053	2.83511	2.27207	1.86384	2.47246	0.968526	2.25264	2.70855	4.07075	1.96019	3.8358	3.60844	3.73982	1.24187	3.02633	5.9608	2.0174	3.35207	2.64264	2.54884	4.12475	2.46584	2.12535	1.26799	2.62447	1.0801	1.27808	0.0378203	2.57996	2.98249
TCGA-VS-A8EC-01	1.40848	2.67782	0.0881405	2.71023	2.9348	2.8155	1.54013	3.14887	2.52577	5.82875	3.47311	4.23784	2.8026	2.28873	3.51579	1.90035	3.54864	1.71004	3.94683	2.54054	2.04249	2.51286	2.64291	2.6371	1.83756	1.97676	2.44426	3.90186	2.61164	4.17872	4.3295	4.15787	1.65217	2.8836	4.64789	2.2934	3.24218	2.66893	2.89456	3.34885	2.586	2.11077	0.961688	2.86696	1.64672	1.43919	0.241553	2.46951	3.18916
TCGA-VS-A8EG-01	0.980129	2.74115	0.141971	3.4108	1.92862	2.77116	1.88309	2.37487	2.55837	5.21869	2.33199	3.87392	2.51098	3.05492	1.88735	1.692	2.59068	1.10064	3.19906	2.38926	1.72393	1.94239	2.22601	2.5794	1.34572	2.41375	2.65851	4.07231	2.0877	4.17287	4.01841	3.96933	1.48802	3.70511	6.2689	2.24336	3.58226	1.98325	2.83513	3.31223	2.89352	1.55486	1.06779	2.95695	0.912863	1.61454	0.0423214	2.72269	2.78652
TCGA-VS-A8EH-01	0.730614	2.97688	0.0483493	2.91221	1.82534	2.38322	0.830005	1.40826	2.37647	4.89406	1.48791	4.48637	1.8504	2.33133	1.86121	2.30737	2.81946	1.22704	3.1763	2.25813	1.94585	3.98874	2.68619	1.63261	0.613662	2.1504	2.88473	3.95453	1.40612	3.54718	3.38904	3.39774	1.21379	3.08418	5.50391	2.40546	3.68123	1.55501	3.05139	2.74689	2.76651	2.14277	1.37925	2.85979	1.15945	1.28278	0.144658	2.87626	2.47338
TCGA-VS-A8EI-01	1.04999	1.74166	0.0563709	2.39841	2.77906	2.00036	0.794321	1.70408	1.91672	5.34228	2.40911	3.66106	2.08222	2.35116	2.12017	0.938514	4.51973	0.755591	3.03634	2.32015	2.5319	2.60445	2.69917	1.9498	1.42245	1.63694	1.5427	3.33421	1.65884	3.10383	4.12922	3.17509	1.62232	2.89291	5.52801	2.25845	3.14544	1.65848	2.93724	3.34597	2.23658	1.82941	1.19176	2.30281	0.724433	0.838267	0.0448063	3.00232	2.58344
TCGA-VS-A8EJ-01	0.696967	1.58787	0.0387415	1.86038	1.16332	1.41551	0.373785	0.780934	2.54913	5.11358	2.42093	4.55764	1.63268	2.13466	1.76412	1.43166	3.13671	0.842963	4.08057	2.77131	1.24416	0.806013	1.07205	1.75262	0.592681	1.82507	2.28294	3.59835	2.28352	3.90066	2.50804	3.29328	0.565148	2.63666	4.36878	2.1534	3.13602	2.08992	3.61637	3.0448	1.75086	1.31107	0.904119	2.75727	1.08311	0.429029	0.0703193	2.97699	1.75626
TCGA-VS-A8EK-01	1.04204	2.22513	0.100601	3.25499	1.82964	2.31621	1.12459	2.26201	1.6798	4.90706	2.52167	4.20312	2.69958	3.04652	1.91285	1.92366	3.99629	1.16225	3.61787	2.51471	1.45631	3.16946	1.93294	2.54777	1.17278	2.02544	2.00808	4.62246	1.8095	4.22967	3.72053	3.90135	1.4362	3.90092	6.2127	2.47226	2.8544	2.16976	3.24696	3.20329	3.21355	2.66274	1.67035	2.42496	0.943889	1.96353	0.0872874	3.25771	2.50216
TCGA-VS-A8EL-01	0.954195	1.81617	0.132531	3.14107	1.93397	2.87325	1.73388	1.90767	2.08351	4.19907	2.14181	4.35149	1.00246	2.271	2.99917	1.69322	2.99469	0.886692	3.41272	2.61078	2.42864	1.22639	1.59719	2.07779	0.855432	1.93274	2.93856	3.61367	2.16267	5.05763	3.43371	3.22938	0.932939	2.72772	5.50152	2.03774	3.73295	1.71908	2.66386	1.94976	2.4919	1.64735	1.15489	1.577	0.868727	0.754471	0.0651077	2.94648	2.62072
TCGA-VS-A8Q8-01	0.74563	1.78961	0.0195799	3.3539	1.61115	1.52935	1.01359	1.73379	1.9172	4.609	1.54119	3.84178	1.9364	2.1392	1.54715	1.66569	2.88778	1.08228	2.78055	1.94892	1.62556	1.90228	0.887135	0.94772	0.760717	1.81992	1.27617	3.19122	2.44343	4.14176	2.97731	4.01073	1.04817	2.65101	6.5755	2.00368	2.39054	1.63658	2.55972	2.92692	2.37013	1.34119	0.924822	2.48063	0.840979	1.39569	0.0336541	2.02395	2.32612
TCGA-VS-A8Q9-01	1.11798	2.2288	0.061323	2.17936	2.77608	2.70886	2.12993	2.1688	2.63159	5.74275	2.56474	5.0015	2.66066	2.67244	3.27079	1.95815	4.03691	0.711973	3.41216	2.06058	2.16127	2.70929	2.15135	3.42343	1.26058	2.19733	2.25978	3.75345	1.45884	4.12819	4.39959	3.4535	1.71203	2.54123	4.94994	1.74282	4.58849	1.88667	3.04792	2.83278	2.63575	1.99059	1.5271	2.07692	1.70104	1.51502	0.0531116	2.63639	2.86601
TCGA-VS-A8QA-01	1.9535	3.0954	0.0350184	2.19699	1.86826	3.01725	2.00667	2.28613	2.9494	5.68449	3.50049	4.28029	3.07939	3.18225	2.19958	2.26392	3.62112	1.57654	3.54494	2.51226	2.35663	0.843546	1.95227	3.3422	1.70262	3.27211	1.97123	3.40025	3.36816	4.19779	4.19097	4.26011	1.39108	3.26633	6.23512	2.16066	3.34415	2.61896	3.20828	2.94982	3.34588	1.67141	1.64263	3.22819	0.948438	1.86683	0.0997855	3.17569	2.93032
TCGA-VS-A8QC-01	0.994958	2.08219	0.05374	2.71232	2.12094	1.99568	1.52426	2.70424	2.21676	5.11671	2.49401	4.15583	2.09669	2.44022	2.2965	1.60813	3.34914	1.09394	3.25425	2.57599	2.34712	2.14878	1.85042	2.34085	0.823971	2.59016	1.86855	3.36456	1.10833	4.08197	4.29653	3.67168	1.59832	3.07477	5.97797	2.25508	2.82998	1.93487	2.9598	2.85007	2.92583	1.9178	1.4703	2.36066	1.35897	1.15247	0.122956	3.08324	2.80152
TCGA-VS-A8QF-01	0.968528	2.18177	0.0774641	2.98341	2.27123	2.28599	1.03136	1.63438	2.32732	4.67875	2.07148	4.78998	2.09406	3.12817	2.28237	1.34871	3.92432	0.833976	2.93448	2.55908	2.41133	3.4126	1.56703	2.1594	1.09177	1.87801	2.9567	3.69704	1.05117	3.71771	4.05066	3.94349	1.0422	3.11034	5.22264	2.10014	3.73711	2.74942	3.67168	2.54343	2.78245	1.96234	1.35872	2.12227	1.08538	0.919139	0.0451062	2.73547	2.72486
TCGA-VS-A8QH-01	0.889721	1.24697	0.0503289	2.78956	1.17934	1.86539	1.50396	0.782282	1.4908	5.48902	2.41749	3.82686	1.89219	1.7282	1.13759	1.7965	2.09244	0.617713	3.68511	2.0921	1.43189	1.23513	1.2851	1.56189	0.452227	1.60288	1.98488	2.79711	2.85564	3.00391	2.11288	3.12659	0.426365	2.72772	5.11662	2.52903	2.88109	2.20132	3.29489	2.826	2.20489	1.58628	0.928418	1.77147	0.523461	0.758365	0.0733004	1.66729	2.52136
TCGA-VS-A8QM-01	2.14037	2.1436	0.0254253	3.17221	1.64173	2.18059	1.05343	1.78263	2.04029	4.57084	2.57589	3.97599	2.23481	2.79968	1.41554	1.61178	3.33982	1.13015	3.1612	2.06238	1.73743	1.79852	2.11557	2.14858	1.10386	1.95864	1.77092	3.4208	2.26582	3.60524	3.37869	3.33648	1.16438	3.49092	5.76104	2.07774	3.24929	2.6773	2.86149	3.22425	2.70658	1.65701	1.3583	2.94762	1.15222	1.53981	0.123759	2.67009	2.91405
TCGA-VS-A94W-01	1.40492	3.05457	0.100735	2.50147	1.97151	2.15361	1.59478	1.96908	2.23947	4.56843	2.17033	4.34665	1.72169	2.76443	2.31312	1.90751	3.60599	1.1795	3.44312	2.10591	1.83465	2.02773	1.99038	2.7665	1.78735	3.30584	2.66441	4.18731	2.22245	4.72546	4.17791	3.91672	1.37302	3.1866	5.91801	2.00379	3.95161	3.11011	3.1563	3.4124	2.41917	1.91666	1.34189	2.43043	1.14803	1.67623	0.0477203	2.57105	2.65589
TCGA-VS-A94X-01	1.24056	2.56643	0.0445951	3.20804	1.78964	2.91141	1.53014	2.03435	1.96386	4.83961	2.76416	4.71117	2.14771	2.46086	2.30268	1.19771	3.66397	1.23783	3.01448	2.03661	3.22447	2.31625	2.19077	2.57016	1.09724	2.52534	2.43963	3.50382	2.40744	3.99495	3.76512	4.0535	1.11392	3.37208	5.02288	2.17412	3.56126	2.57211	2.48116	3.38823	2.44962	2.06181	1.28421	2.21494	1.36508	1.69876	0.200525	2.71771	2.64842
TCGA-VS-A94Y-01	1.17412	1.93464	0.0229955	3.53082	1.76377	2.03802	0.762273	1.29355	1.49437	4.71104	2.73918	4.42431	2.01413	1.91851	2.00013	2.06444	4.25725	0.794514	2.95204	2.44648	1.87463	2.81885	1.80709	1.74743	0.874273	1.9181	1.60995	2.80272	1.50182	2.66019	2.70675	3.96573	1.17558	2.98645	5.29521	2.45978	2.35334	2.22065	2.85425	2.91692	1.99244	1.85321	1.1742	2.18538	1.33425	1.54931	0.147355	2.4303	2.31797
TCGA-VS-A94Z-01	1.74799	2.77846	0.0268673	2.68974	1.80344	3.07407	1.42315	2.32261	1.49873	4.5403	2.5338	3.89561	2.31036	2.87395	2.0405	1.55787	3.6046	1.36203	3.20188	2.07228	2.07631	2.15817	1.95866	2.38598	1.30363	2.50756	1.99537	3.22009	2.20367	3.63147	3.58843	3.92061	1.55413	3.36626	5.66515	2.44788	2.48735	2.21854	2.63042	3.64861	2.67602	2.27579	0.989533	2.6978	0.8661	1.68954	0.348538	2.77434	3.26443
TCGA-VS-A950-01	1.10625	2.09418	0.0427232	3.24233	3.26598	2.44587	1.24964	1.89819	1.80415	4.01804	2.76204	3.47017	2.38875	2.98047	2.3906	1.23196	3.28769	1.22374	2.88316	2.45412	2.59252	2.38036	2.06037	3.40953	1.38999	2.19968	2.95844	4.2314	1.96959	4.50926	5.13076	3.70922	1.32529	3.19637	5.23196	2.4479	3.59528	2.13693	2.95551	3.1026	2.68137	2.05994	1.35415	3.75237	1.1083	1.35308	0.0640897	3.32635	2.9813
TCGA-VS-A952-01	1.78622	1.97886	0.178355	2.73256	1.68892	2.96004	1.85858	2.12836	2.4281	4.82268	2.28068	4.39201	2.79565	2.75975	1.89526	2.91596	3.05757	1.49317	3.33013	2.05743	2.33995	0.338924	2.62718	2.07751	1.25036	2.6962	3.11609	3.27628	2.99106	3.9758	3.98333	4.57022	1.72549	3.50106	5.02192	1.86491	3.67444	3.06724	3.33082	3.95711	2.54357	1.81666	1.30124	3.71221	0.958685	2.06883	0.0715452	3.08247	3.28869
TCGA-VS-A953-01	1.0245	2.13236	0.114549	3.5221	1.75639	1.49603	0.881129	1.88183	1.9488	5.0943	2.9069	3.66327	1.6838	2.99797	1.61719	0.713912	2.80521	0.490845	3.1988	1.89375	1.40428	1.03483	1.43171	3.44953	0.753228	2.36771	2.84372	4.07377	1.83622	4.24081	3.37923	3.09296	1.59407	3.51776	4.8296	2.40952	3.63497	2.65241	3.07256	4.0925	2.09407	1.72679	0.970007	2.84632	0.573435	1.29224	0.0113949	3.25909	3.44184
TCGA-VS-A954-01	0.834215	2.33629	0.112697	2.09532	1.57595	2.13096	1.16091	1.90742	2.7933	4.72511	1.97424	4.29005	1.60008	3.30121	1.93226	0.924849	3.27915	0.818126	2.7241	2.45937	2.4953	1.26102	1.58006	1.91924	1.09588	2.42821	2.36588	3.86725	2.23633	3.93873	3.34509	4.04913	0.94286	3.40665	6.38651	2.07939	3.44453	1.92962	3.15751	3.25068	2.82512	1.80519	1.05825	2.94878	0.747835	1.09456	0.0659553	2.53545	3.21872
TCGA-VS-A957-01	1.80762	3.02971	0.0875645	2.28071	2.10035	3.0071	1.96755	2.59581	2.94265	5.35735	2.57789	5.32231	3.29756	3.29517	2.69212	2.40885	3.32975	1.26641	3.51884	2.2597	2.22501	1.72096	2.51699	3.14536	1.34549	2.9043	2.9399	3.62694	2.15229	4.4258	4.10312	4.61627	1.63527	3.4603	5.86707	2.42164	3.88964	2.98282	3.18973	2.98586	2.94115	2.19465	1.23758	2.97559	1.49712	1.91113	0.199892	3.09537	3.52783
TCGA-VS-A958-01	1.14954	1.85823	0.0691279	2.85908	1.92671	2.62923	1.50476	2.10103	1.49532	5.28465	2.70643	4.3253	2.09518	2.90288	1.14329	2.46774	4.05846	1.0042	3.32356	1.69761	2.58361	1.03313	1.8542	2.83148	0.925404	2.55777	2.39184	3.70549	1.87597	3.89073	3.97244	3.36541	1.11498	3.59706	5.41584	2.24132	3.43591	2.48282	3.01832	3.75516	2.57629	1.58619	0.96807	3.09727	0.697783	0.976382	0.103235	2.92575	2.13001
TCGA-VS-A959-01	1.77871	2.79775	0.11923	2.21525	2.29635	2.79706	1.52875	2.50206	2.06812	4.80069	2.22627	4.82307	2.37592	3.29593	2.38527	1.64809	4.31469	1.14223	3.38849	2.2536	2.53793	1.93516	2.6804	2.63815	1.34409	2.26905	2.91327	2.96079	2.55629	4.02797	3.99595	4.0805	1.17558	3.22223	5.74526	2.16486	3.64941	3.01311	3.06872	3.30844	2.51427	1.8653	1.36723	2.96974	1.20211	1.55332	0.0867897	2.88128	2.93752
TCGA-VS-A9U5-01	1.80147	2.64949	0.171946	3.04844	1.9346	3.20071	0.98434	2.92259	1.95157	5.93168	2.63106	4.33201	2.50133	3.15644	2.70499	1.78841	3.55675	2.21879	3.71257	2.30033	1.62676	0.881208	2.09434	3.25204	1.28211	2.33317	2.35521	4.44953	1.59979	4.27852	3.30555	4.01702	1.97165	3.04086	6.5883	1.89834	3.23042	3.78326	3.23374	3.31186	3.24332	2.16025	1.24175	3.49906	1.35816	1.23164	0.162534	3.05169	2.72027
TCGA-VS-A9U6-01	1.30546	3.17839	0.0672474	3.54323	1.74423	2.55579	1.24906	1.61219	1.7301	5.2121	2.26397	4.77678	2.91459	2.66317	2.12938	1.81768	3.23663	1.47407	3.62456	2.27577	2.09312	2.36649	2.22163	2.80405	1.26753	1.52662	2.66062	4.79798	2.93775	3.09786	3.50251	4.27701	1.2006	3.54688	5.35809	2.35544	1.06073	1.94767	2.93597	4.00568	3.22299	2.00158	1.46173	2.79014	1.09027	2.00886	0.0865288	2.55456	3.06296
TCGA-VS-A9U7-01	0.767722	1.89314	0.0723976	2.56904	1.6799	2.03962	1.49381	1.71989	2.83284	5.33245	2.13855	4.06746	2.09161	2.82099	1.95786	1.47826	2.78529	0.903439	3.23661	2.33259	2.90023	2.34885	1.68815	2.02327	0.613126	2.31812	2.44968	4.30855	1.86404	4.45167	3.70778	3.72391	1.0161	3.15717	5.83126	2.31193	4.06516	1.67677	3.25534	2.81855	2.7854	1.44726	1.34365	2.54119	1.19999	1.08638	0.145328	2.7251	2.99091
TCGA-VS-A9UB-01	1.80232	2.35467	0.115385	3.84457	2.37717	2.61677	1.75273	2.62038	1.74804	4.94661	2.80863	3.93033	1.98198	2.696	2.5323	2.47577	2.55962	1.94528	3.79272	1.80764	2.04387	2.37275	2.70764	2.20726	1.39033	3.08227	2.97972	3.41435	2.03295	4.62949	4.61476	3.7746	1.38605	3.34309	4.33891	2.79892	3.63794	2.61606	2.71729	3.81223	2.28085	2.39161	1.74576	3.44139	1.53215	1.57781	0.116222	3.31122	2.61289
TCGA-VS-A9UC-01	1.39236	1.71206	0.068674	2.97087	2.11778	2.25939	1.18673	1.92672	1.4298	4.97771	2.37709	4.55689	2.09372	2.8216	1.64523	2.04166	3.11544	0.994117	3.52455	1.78635	1.79807	0.822164	2.1054	2.35481	0.894889	2.10082	2.47614	3.3932	2.24224	3.8948	4.03139	4.10632	0.982968	3.39398	5.34692	2.08224	3.2039	2.61688	2.8255	3.73737	2.39822	1.85484	1.23991	3.29172	0.962138	1.76788	0.106097	2.32102	2.72852
TCGA-VS-A9UD-01	0.666416	1.90367	0	1.66127	1.33843	2.5117	0.882223	1.86072	3.36938	5.79331	1.68738	4.27014	1.56974	2.86194	1.96385	1.12284	3.90275	0.648223	3.20029	2.54113	2.93981	2.72266	0.719622	1.87923	1.12507	2.75463	1.99763	4.36616	1.81235	4.36175	3.27388	4.17182	0.938532	2.70696	5.26752	1.75602	3.40831	1.42352	2.83324	2.42004	2.16949	1.34328	1.14068	2.3938	0.641137	0.743051	0.141024	3.16583	2.32578
TCGA-VS-A9UH-01	1.07198	2.13935	0.0212189	2.26085	1.29148	2.07484	1.26345	1.51637	2.15424	4.55589	2.58081	3.53267	1.38746	2.56279	1.8184	2.0062	3.66658	0.788235	3.11172	2.47195	2.07019	1.65244	1.08983	2.897	0.889672	2.25242	1.83503	3.29994	1.53491	3.76289	2.78187	3.47073	1.01497	2.74888	5.12905	2.27606	3.23136	2.24069	2.87788	3.14664	2.17047	1.2999	1.16045	2.59395	0.715047	1.0124	0.0851257	2.56669	2.69234
TCGA-VS-A9UI-01	0.85059	1.92972	0.170551	3.15157	1.20587	1.92489	1.14843	1.57017	1.69568	4.60609	1.7861	4.43405	1.81503	2.51839	1.57693	1.32992	3.25518	1.24457	3.01774	2.14787	3.09823	1.89009	1.73903	2.02064	0.978922	1.52772	2.53647	3.71946	2.162	3.45363	3.12987	3.50174	1.32919	3.32972	5.92434	2.06687	3.91173	1.63475	2.96669	3.19464	2.85949	1.68886	1.07844	2.71254	0.841365	1.32931	0.070415	2.29429	2.35521
TCGA-VS-A9UJ-01	1.40899	1.88814	0.103327	2.44221	2.00657	1.85138	1.13426	1.44732	1.33928	4.47912	2.43103	4.46566	2.35143	2.40059	2.00216	2.18636	3.59743	1.13489	3.65923	2.78992	1.94344	2.18542	2.07799	2.65709	1.20723	2.28676	2.99045	2.69245	2.56951	3.52318	3.18022	2.8626	0.859862	3.8645	5.10827	2.07047	0.405064	2.38335	3.28248	3.08652	1.97334	2.13108	2.19839	3.2632	2.03924	1.4488	0.514821	2.42548	2.91736
TCGA-VS-A9UL-01	2.16164	2.92834	0.178653	3.28352	2.98301	3.19344	2.10041	3.09886	1.96861	5.16814	3.46531	5.27829	2.69094	3.08414	3.81676	1.47958	3.45042	1.68782	3.93983	2.54505	2.50307	1.72671	2.6178	3.36076	2.03421	3.19214	3.05814	3.32763	2.89719	4.76954	5.20947	4.65306	1.95684	3.30752	7.16145	2.66905	3.84972	3.4682	3.24047	3.41916	2.8746	2.77939	1.89504	3.94778	2.49933	1.7998	0.111516	4.68496	3.37578
TCGA-VS-A9UM-01	1.61944	2.3255	0.131968	3.46903	1.48316	1.89927	1.07146	2.27697	2.17138	5.05959	2.72428	4.73442	2.52642	2.75015	1.62501	1.98488	2.92251	1.31495	3.44647	1.99954	2.10479	1.37089	2.54334	2.45781	0.856963	2.17472	1.68582	3.66933	2.06328	3.99803	3.78617	3.78879	1.10029	3.84939	6.31306	2.55279	3.06766	2.92148	3.02145	3.43129	2.8357	1.93339	1.41531	3.41011	1.52459	2.01429	0.146462	2.66929	2.98732
TCGA-VS-A9UO-01	2.1202	2.12678	0.0893422	1.46442	2.56005	2.64966	1.75691	2.36402	1.26815	5.75292	2.02474	4.63954	2.7825	2.86948	1.55573	2.03975	3.10897	1.0649	3.54891	1.81086	2.1661	2.00155	2.54064	2.07818	0.931147	2.31882	2.96388	3.14136	2.10301	4.08002	4.72799	3.8519	1.42842	2.98502	5.51149	2.04601	3.6481	2.73395	3.312	2.9276	3.17048	1.65272	1.21703	2.76365	1.04348	1.47093	0.201633	2.87563	3.05217
TCGA-VS-A9UP-01	1.64621	2.40422	0.144072	2.52183	2.45129	2.15432	2.85886	2.51398	2.51698	4.83893	2.80657	5.33924	3.13734	2.69957	2.80262	2.06386	4.37846	1.46828	2.74624	2.82516	2.86257	1.82362	2.54481	3.74672	1.3832	2.77072	2.52795	3.87036	1.72645	3.88482	4.59124	4.73663	1.73337	2.97145	5.46668	2.45793	3.12888	2.69409	3.37635	3.3009	2.87084	2.20143	1.29347	3.34705	1.44688	1.27494	0.553299	4.4898	2.30375
TCGA-VS-A9UQ-01	1.24506	2.03637	0.166572	2.90648	2.09075	3.13259	1.6528	1.97677	2.41355	5.01021	2.25646	4.0268	2.69818	2.92369	1.79232	1.6459	3.24187	1.19463	3.61319	2.29767	1.23184	1.39883	2.56798	1.77855	0.96487	2.65613	2.45722	3.2751	2.87375	4.10451	4.12359	3.93853	1.27749	3.39835	5.3899	2.05232	3.82543	1.95512	3.28621	3.41599	2.63681	1.92346	1.25047	3.572	0.918683	1.84371	0.14112	2.83755	2.78608
TCGA-VS-A9UR-01	2.0309	1.95191	0.162928	3.56881	1.73768	2.68133	1.60985	2.09014	1.81613	4.86063	2.88402	4.06363	1.94235	3.08194	1.74507	1.5326	3.63301	1.5284	3.57034	2.26438	1.75516	2.21962	2.49607	2.54249	0.971489	2.82635	3.14621	3.3378	2.82035	2.62689	3.60716	3.81517	1.45968	3.86059	5.28932	2.22097	4.65416	2.83786	3.10393	3.36737	2.60411	2.01595	1.24757	3.7251	0.999683	1.76885	0.175128	2.87804	3.00905
TCGA-VS-A9UT-01	2.34981	2.15811	0.0151455	3.31735	1.62978	2.24048	1.09829	1.41379	1.6153	4.44767	1.73021	4.22258	2.51971	2.6807	1.95754	1.53583	3.62	1.80373	3.99137	2.58323	2.12273	2.76839	2.12151	2.20372	0.948778	1.48138	2.59746	2.77134	2.69803	3.23295	2.79203	3.04693	1.3267	3.40629	4.21001	2.38642	3.86571	2.11481	3.19638	3.59142	2.37099	1.73301	1.45976	2.28872	1.72877	1.49772	0.658776	2.47119	2.88504
TCGA-VS-A9UU-01	1.11221	1.99088	0.0155633	2.76973	1.34172	2.20512	1.05135	1.74549	1.68928	5.12292	2.47796	3.78856	1.90439	2.47067	1.87051	1.69603	3.81229	1.40127	2.70443	1.85611	2.1971	0.938423	2.49899	2.18137	0.763279	2.1614	2.11793	3.40012	2.16395	4.27056	3.61466	2.89367	1.28128	3.15338	4.98272	1.68924	3.63762	2.35607	2.29551	3.66688	3.13257	1.51853	1.18722	2.61057	1.18843	1.00059	0.0465385	2.08364	2.45586
TCGA-VS-A9UV-01	1.13668	2.63298	0.0585298	2.79765	1.89135	3.09111	1.44168	2.70661	2.34936	5.72908	3.51075	4.28248	2.494	3.34061	2.38289	1.5351	3.09185	0.821215	3.101	2.01165	2.37351	1.30435	1.13685	2.78087	1.40063	3.03845	2.81901	4.71908	2.03711	4.26851	3.85356	4.00363	1.49864	3.66199	6.13987	1.68149	3.52621	2.72354	3.09207	3.91862	3.0264	1.09985	0.793343	3.3706	0.641253	1.6977	0.0606128	3.05309	3.04071
TCGA-VS-A9UY-01	1.50755	1.99818	0.137487	4.18598	1.89953	2.64833	1.72234	1.97602	1.48642	4.11885	3.01482	3.8487	2.37269	3.21593	1.72275	1.37956	2.77461	1.55259	3.01238	2.07124	2.45231	2.04532	2.44886	1.84797	1.08865	2.02407	2.66322	3.6868	0.392155	3.63738	3.79973	3.73441	1.97797	3.60333	5.72976	2.37793	3.64482	2.79065	3.6543	4.10543	3.04473	1.92407	1.11306	2.79992	1.27479	1.6832	0.0963709	3.6201	3.16036
TCGA-VS-A9UZ-01	2.03446	2.13801	0.123209	2.449	1.51159	3.19888	1.61289	2.70653	2.2869	5.1057	2.80383	4.01452	2.81594	2.81926	1.45975	1.61795	3.30622	1.04586	3.76581	2.10899	1.64135	1.35927	2.41376	3.18388	1.83228	2.4537	2.55802	3.04044	2.92746	3.82203	3.11672	3.64787	1.49122	3.28168	5.79789	2.31349	3.94637	2.83258	3.55497	3.5597	2.76119	2.64353	1.38784	3.14993	1.1633	2.35429	0.221	2.66796	3.08456
TCGA-VS-A9V0-01	1.78457	2.2771	0.104259	3.22648	2.47944	2.58945	1.46199	1.22927	1.79546	5.81066	2.61904	4.66676	2.0304	2.58427	2.17132	2.01614	2.7188	1.48623	3.77935	3.24808	2.01301	1.85792	2.32471	1.84065	0.973557	1.58902	3.04803	2.30239	2.18113	2.50426	3.78912	3.18597	1.41686	3.82948	6.10043	2.79117	3.32981	2.68991	2.99161	4.15801	2.2913	2.30697	1.87447	2.3725	1.70175	1.85735	0.0816793	2.47621	3.50705
TCGA-VS-A9V1-01	2.39594	1.6902	0.114694	3.00042	1.71339	2.75767	1.28439	1.60872	2.30631	5.86154	3.01301	4.64861	2.36544	2.6115	2.56823	2.04422	3.18219	1.14711	3.74332	2.69972	2.39595	1.78291	2.49223	3.59529	1.0663	1.62041	2.70479	2.89539	3.00789	4.28834	3.67185	3.24677	1.29263	2.97743	5.09719	2.85131	4.13411	2.32853	3.6017	3.00241	2.43356	1.77689	1.39334	2.28312	1.41357	1.37966	0.0753211	2.46487	3.09091
TCGA-VS-A9V2-01	1.72965	2.68782	0.100467	3.13409	1.97835	2.76691	2.08748	2.12986	2.02596	5.61437	2.20587	4.55245	2.11948	3.12377	2.03502	2.2599	3.1106	1.40859	3.17854	1.9157	1.78028	2.39692	2.38837	2.37275	0.949136	2.24531	2.97265	4.26237	0.678788	3.88842	4.11925	3.03947	1.5231	4.06371	5.50016	2.36487	3.8316	2.93947	2.73117	3.6349	2.99821	2.19231	1.10448	3.0142	1.30926	1.56421	0.0871701	2.75134	3.04482
TCGA-VS-A9V3-01	1.72686	2.10267	0.235886	3.09779	1.88293	2.61365	1.3486	2.49112	0.989722	4.14022	2.90909	4.57723	2.69638	2.88752	1.65442	1.86003	3.52539	1.30883	2.93735	1.50386	2.38451	2.22801	2.63303	3.23079	1.2723	1.9442	2.65911	2.83071	2.418	3.98105	3.84531	4.47707	1.18962	3.41608	5.68531	1.68538	3.66896	2.53798	3.17404	3.53383	3.00109	1.51251	1.19261	3.32172	1.15759	2.06595	0.112018	2.84259	3.07116
TCGA-VS-A9V4-01	1.48363	2.04184	0.0850636	3.46113	2.04762	2.63847	1.38602	1.02781	1.34313	4.90137	2.96101	3.79469	2.00393	2.47605	2.33129	1.20976	2.55597	1.03446	3.04375	1.91791	1.88747	2.39983	1.77914	1.75494	1.0848	1.62445	2.82984	2.75954	3.23197	3.76623	3.06046	3.1249	0.759969	3.23402	4.93349	2.59725	3.05576	2.69899	2.78693	3.4585	2.16922	2.10182	1.26869	2.04374	0.802416	0.997343	0.150752	3.18466	2.60476
TCGA-VS-A9V5-01	2.1572	2.24591	0.0970179	2.82489	1.66614	2.97857	2.23842	2.45291	2.17229	4.86291	2.99908	4.4527	2.71832	2.84407	2.75684	1.39581	3.22713	1.39264	3.39696	2.15251	2.07033	2.16894	2.72111	2.12388	1.29697	2.82956	2.77182	3.37953	2.83237	4.29396	4.03275	4.34799	1.54047	3.32834	5.31274	2.13318	4.06173	2.86806	3.14322	3.57593	2.75911	1.99755	1.1658	2.97798	2.10214	1.87653	1.09855	2.65358	3.01467
TCGA-VS-AA62-01	1.42782	2.34648	0.0678845	4.57475	1.87268	2.81298	1.69927	2.14874	1.5877	4.04288	2.38207	3.71616	2.24983	2.54015	1.65014	1.98038	3.50827	1.22143	3.1206	1.58958	2.13699	1.49371	2.07702	2.31296	1.04008	2.05602	2.7494	3.44283	2.24687	3.47108	3.49111	3.16396	1.11632	3.34175	4.41868	2.18027	4.12837	3.75505	2.88729	3.53758	2.859	2.01967	1.13808	2.96223	1.60409	1.43088	0.150512	2.44795	2.78157
TCGA-WL-A834-01	1.13668	2.62808	0.12516	2.20705	1.96562	2.1939	0.713793	1.63228	1.30464	5.00549	2.71466	4.77527	1.92571	2.61504	1.86074	0.856593	3.155	0.517365	3.30862	2.14599	2.9482	1.50231	1.99936	2.58358	1.02419	1.85146	2.80293	3.39245	1.25273	3.51333	3.45225	4.09693	1.22448	2.62184	6.15064	2.10238	3.38085	2.64472	3.08458	3.30014	2.60464	1.79916	1.37843	2.5294	1.1017	0.834869	0.0511968	3.53534	2.27814
TCGA-XS-A8TJ-01	1.43946	2.59434	0.131294	3.46197	1.46459	2.41487	1.41197	2.02922	2.30549	4.91965	2.63156	4.57499	2.80391	2.74323	1.80097	2.42431	3.17564	1.17987	3.16808	2.06245	1.7808	1.50115	1.97865	2.65069	1.16216	1.8058	2.06055	4.39648	2.27719	3.76112	3.4881	3.69783	1.36978	3.20454	5.91343	1.88128	3.68728	2.40569	2.62754	3.74407	3.47611	1.87311	1.50104	2.56545	1.71312	1.44129	0.0548079	3.52457	2.58614
TCGA-ZJ-A8QQ-01	1.27086	1.56311	0.162688	4.00288	2.16169	2.51482	1.17339	1.96628	1.65891	4.46632	3.06257	3.95518	2.25015	2.57044	2.09547	1.94588	3.7887	1.21656	3.11729	2.09687	1.43041	2.24664	2.25938	2.65901	0.94962	2.70247	2.89838	4.81929	0.146061	3.83515	3.61584	3.55538	1.40201	3.00554	4.80322	2.1414	3.77276	2.64725	2.94942	3.74188	2.67122	2.01715	1.0965	2.608	0.786063	1.15308	0.305253	2.41422	2.92652
TCGA-ZJ-A8QR-01	0.869755	1.55467	0.0204991	2.7588	2.03524	2.26295	1.08246	2.10891	2.35483	4.50494	2.21224	4.10582	1.96883	2.62967	2.21047	1.88081	3.32336	0.882145	3.13706	1.9683	1.93675	3.21962	1.53925	2.45585	1.04857	2.21294	1.68876	3.89256	1.7259	3.86897	3.93566	4.1331	1.29657	2.63458	5.68938	2.30304	3.06849	3.41641	2.97635	3.35153	2.71988	1.76299	0.872027	2.69269	1.24502	1.28903	0.0696124	2.584	2.52769
TCGA-ZJ-AAX4-01	1.1166	2.00731	0.0381314	3.43975	2.02071	2.37944	1.88725	1.86871	1.79274	5.32821	2.31101	4.91789	1.94861	2.81167	2.2118	2.0942	2.95568	1.16928	3.52238	2.39333	2.93665	1.72288	1.93206	2.81391	1.40488	1.42714	1.90682	3.58375	2.09189	3.7942	3.74239	4.13934	1.64296	3.61792	5.82503	2.71487	3.05861	2.18212	3.13839	3.20472	3.07236	1.89623	1.70987	2.67573	1.39566	1.3391	0.226043	2.61886	2.983
TCGA-ZJ-AAXA-01	1.04829	2.57272	0.172956	3.04333	1.98555	2.39401	1.11375	2.41677	2.34346	5.26676	2.92059	4.51252	2.60681	3.42629	1.60392	1.58803	3.39915	1.11848	3.18538	1.74882	2.38749	1.865	2.11904	3.00972	1.39773	2.87395	2.89319	4.27963	2.32538	4.09702	4.11891	3.45427	1.41587	3.10727	6.40385	2.17118	4.15939	2.92534	2.83938	3.1773	3.36892	1.68278	1.21774	3.368	1.06213	0.956068	0.0157824	2.76149	2.7224
TCGA-ZJ-AAXU-01	0.925422	1.95234	0.0236621	2.6179	1.88483	1.92892	1.15978	1.53214	2.41348	4.12425	2.42083	3.82449	1.83264	2.31645	1.82711	1.14466	3.05388	0.756306	3.11759	2.17319	1.99402	1.76483	1.44721	2.02174	0.635098	1.96045	1.83981	4.283	2.02748	3.99067	3.36408	3.72873	0.927316	3.21632	5.89486	2.27824	2.82532	1.89783	3.26729	2.65989	2.49789	0.985874	0.900724	2.30232	0.859947	1.10263	0.0752653	3.56082	2.93634
TCGA-ZX-AA5X-01	1.2545	1.79822	0.0757833	2.9169	1.43684	2.05315	1.14798	1.54457	1.883	4.49291	2.31967	4.03771	1.81129	2.53405	1.61515	1.65523	3.36189	1.05049	3.52086	2.50039	2.05527	2.00514	1.85771	1.91328	0.681708	1.8092	2.34788	3.20307	1.5954	3.28788	3.11348	3.4244	0.973826	3.39033	5.34863	2.17125	3.39088	1.97204	3.19067	2.93068	2.53494	1.6287	1.21194	2.47807	1.16701	1.44681	0.206276	2.41608	2.78963
[truncated: 31 more columns]

## Sheet: Sheet4
Data4.1. DEGs of high- and low- risk FPS-OS/RFS group (The original data is not filtered)										Data4.2. DEGs of high- and low- risk FPS-RFS group(The original data is not filtered)
id	baseMean	logFC	lfcSE	stat	pvalue	FDR				id	baseMean	logFC	lfcSE	stat	pvalue	FDR
2021-03-03	264.819	0.0151775	0.125449	0.120986	0.903702	0.953529				2021-03-03	264.819	-0.416715	0.138661	-3.00529	0.00265331	0.0098631
2021-03-04	17.5609	-0.981524	0.269323	-3.64441	0.000268008	0.00226515				2021-03-04	16.3181	1.38513	0.291321	4.75464	1.99e-06	2.25e-05
2021-03-05	2621.23	-0.0892331	0.0524849	-1.70017	0.0890994	0.197016				2021-03-05	2621.23	-0.0788766	0.0587617	-1.34231	0.179494	0.298762
2021-03-06	8076.74	-0.221459	0.0695013	-3.1864	0.00144057	0.00844053				2021-03-06	8076.74	-0.124176	0.0782887	-1.58613	0.112709	0.20773
2021-03-07	4371.46	-0.127064	0.0514354	-2.47036	0.0134975	0.0475135				2021-03-07	4371.46	-0.157874	0.0572207	-2.75904	0.00579706	0.0189159
2021-03-08	1397.53	-0.0569925	0.062315	-0.914587	0.360408	0.533263				2021-03-08	1397.53	-0.015044	0.0698095	-0.215501	0.829376	0.902079
2021-03-09	1238.3	0.210015	0.066115	3.17652	0.00149055	0.00866241				2021-03-09	1238.3	-0.0025659	0.0749123	-0.0342521	0.972676	0.984748
2021-03-10	23.3918	0.0828399	0.229605	0.360793	0.718254	0.837241				2021-03-10	23.3918	-0.88532	0.250036	-3.54077	0.000398955	0.00200875
2021-03-11	0.445475	1.01376	0.80526	1.25892	0.208058	0.363223				2021-03-11	0.445475	2.06058	0.878839	2.34466	0.0190444	0.0498549
2021-09-01	657.811	0.87977	0.122687	7.17084	7.45e-13	3.17e-10				2021-09-01	657.811	1.27799	0.12977	9.84809	6.99e-23	1.11e-19
2021-09-02	16814.2	-0.206992	0.0602624	-3.43484	0.000592899	0.00425809				2021-09-02	16814.2	-0.186971	0.0675629	-2.76737	0.0056511	0.0185059
2021-09-03	758.992	0.19882	0.166553	1.19373	0.232584	0.393499				2021-09-03	758.992	-0.633532	0.183829	-3.4463	0.000568312	0.00269809
2021-09-04	281.522	-0.170978	0.125778	-1.35936	0.174032	0.320349				2021-09-04	281.522	0.840953	0.13462	6.24688	4.19e-10	1.34e-08
2021-09-05	871.295	-0.187878	0.168714	-1.11358	0.265458	0.432459				2021-09-05	871.295	-0.13989	0.188075	-0.743798	0.456999	0.601806
2021-09-06	2023.36	0.369785	0.0943212	3.92049	8.84e-05	0.000946452				2021-09-06	2023.36	0.504087	0.1042	4.83768	1.31e-06	1.58e-05
2021-09-07	7651.52	-0.158583	0.0499181	-3.17686	0.00148881	0.00865667				2021-09-07	7651.52	-0.116779	0.0563604	-2.07201	0.0382645	0.0880314
2021-09-08	3894.63	-0.106175	0.0595101	-1.78415	0.0743994	0.172179				2021-09-08	3894.63	-0.151781	0.0660302	-2.29866	0.0215245	0.0551319
2021-09-09	19431.9	-0.0419124	0.0641975	-0.652867	0.513842	0.677271				2021-09-09	19431.9	0.0357737	0.0715262	0.500148	0.616971	0.742026
2021-09-10	3293.58	-0.342446	0.0914654	-3.74399	0.000181121	0.00166155				2021-09-10	3293.58	0.0145325	0.104274	0.139369	0.889159	0.939023
2021-09-11	3768.57	-0.22952	0.0803336	-2.85708	0.00427552	0.0195268				2021-09-11	3768.57	-0.319473	0.089134	-3.58419	0.000338124	0.00175231
2021-09-12	7.01106	0.344218	0.231627	1.48609	0.137256	0.270437				2021-09-12	7.01106	-0.764019	0.256598	-2.9775	0.00290611	0.0106414
2021-09-14	0.975959	-1.45026	0.394078	-3.68015	0.000233097	0.00202377				2021-09-14	0.812901	-0.807156	0.426815	-1.89112	0.0586089	0.123824
2021-12-01	10.9269	-0.57347	0.243692	-2.35325	0.01861	0.0608738				2021-12-01	12.2444	1.42597	0.276838	5.15094	2.59e-07	3.93e-06
A1BG	14.1849	0.0572465	0.138482	0.413384	0.679325	0.810189				A1BG	14.1849	0.491953	0.153065	3.21402	0.00130893	0.00546376
A1CF	5.63397	-0.457831	0.303264	-1.50968	0.131126	0.261214				A1CF	4.83686	0.303521	0.327028	0.92812	0.353346	0.497952
A2M	9841.42	0.0597255	0.132377	0.451175	0.651863	0.789617				A2M	9841.42	0.541756	0.15029	3.60473	0.000312476	0.00163714
A2ML1	7719.37	-0.622105	0.280134	-2.22074	0.0263686	0.0791389				A2ML1	7719.37	-0.056954	0.314566	-0.181056	0.856324	0.919575
A3GALT2	7.82153	0.134518	0.166401	0.8084	0.418861	0.592134				A3GALT2	7.82153	-0.0394495	0.184605	-0.213697	0.830784	0.902695
A4GALT	3321.92	0.0216531	0.135111	0.160262	0.872675	0.936398				A4GALT	3321.92	0.031792	0.150692	0.210974	0.832908	0.904027
A4GNT	3.32753	0.0935976	0.200066	0.467834	0.639903	0.781147				A4GNT	3.32753	-0.418787	0.216629	-1.9332	0.0532115	0.114716
AAAS	2541.55	0.168555	0.0477947	3.52665	0.000420846	0.0032362				AAAS	2541.55	0.113444	0.0541744	2.09405	0.036256	0.084214
AACS	3111.68	0.0207824	0.0661876	0.313992	0.753527	0.861598				AACS	3111.68	-0.0519662	0.0738229	-0.703931	0.481476	0.624628
AADAC	45.9957	-1.10119	0.288712	-3.81417	0.000136644	0.00133624				AADAC	45.9957	-0.207478	0.328523	-0.631548	0.527682	0.66752
AADACL2	12.8659	0.346246	0.384927	0.89951	0.368381	0.541137				AADACL2	15.8012	0.613394	0.445466	1.37697	0.16852	0.284283
AADACL3	0.618115	0.121838	0.650185	0.18739	0.851355	0.922947				AADACL3	1.03845	2.79088	0.739706	3.77296	0.000161324	0.000942275
AADACL4	0.466355	-0.336512	0.443391	-0.758951	0.447882	0.619192				AADACL4	0.519248	0.130429	0.519585	0.251026	0.801794	0.884395
AADAT	265.702	0.240528	0.200613	1.19897	0.23054	0.39101				AADAT	237.895	-0.929986	0.207459	-4.48274	7.37e-06	6.96e-05
AAED1	659.771	0.0643217	0.0854878	0.752408	0.451806	0.622638				AAED1	659.771	0.21631	0.0952746	2.27038	0.0231843	0.0584207
AAGAB	3470.22	0.0552363	0.0538958	1.02487	0.305424	0.47538				AAGAB	3470.22	0.0543887	0.0603951	0.900548	0.367829	0.512958
AAK1	2261.81	-0.0544443	0.0646995	-0.841496	0.40007	0.574431				AAK1	2261.81	0.178867	0.0718264	2.49027	0.0127647	0.0359511
AAMDC	804.137	0.371797	0.103638	3.58747	0.000333905	0.0027045				AAMDC	804.137	0.380009	0.118115	3.21727	0.00129416	0.00541395
AAMP	6433.2	-0.0110389	0.0576011	-0.191644	0.848021	0.921341				AAMP	6433.2	0.0509508	0.0643486	0.791794	0.428481	0.573565
AANAT	24.8218	0.360325	0.163217	2.20765	0.0272686	0.0813041				AANAT	24.8218	0.260414	0.183039	1.42273	0.154815	0.266285
AAR2	2712.72	-0.0174339	0.0469668	-0.371196	0.710491	0.831029				AAR2	2712.72	0.0422347	0.0520325	0.811698	0.416965	0.562187
AARD	12.4686	-2.31102	0.30945	-7.46816	8.13e-14	4.86e-11				AARD	9.98259	1.2261	0.34583	3.54538	0.000392055	0.00198274
AARS	9752.29	0.0854805	0.0592662	1.44232	0.149213	0.287104				AARS	9752.29	0.0764072	0.0667765	1.14422	0.252531	0.386819
AARS2	1485.47	0.00634024	0.0554538	0.114334	0.908973	0.956977				AARS2	1485.47	0.152205	0.0615053	2.47467	0.0133359	0.0372433
AARSD1	272.928	0.066394	0.054847	1.21053	0.226075	0.385111				AARSD1	272.928	-0.0131548	0.0613842	-0.214302	0.830311	0.902666
AASDH	592.764	0.0263173	0.0579703	0.453978	0.649845	0.788458				AASDH	592.764	-0.240986	0.0633567	-3.80364	0.000142584	0.000847348
AASDHPPT	1681.78	-0.283987	0.077501	-3.6643	0.000248012	0.00212909				AASDHPPT	1681.78	-0.213943	0.0874951	-2.4452	0.0144771	0.0397891
AASS	289.231	0.156797	0.164808	0.951394	0.341404	0.513692				AASS	289.231	0.123551	0.184148	0.670933	0.502263	0.644274
AATF	4165.27	0.183443	0.053839	3.40726	0.000656187	0.00460873				AATF	4165.27	0.239235	0.0597266	4.00551	6.19e-05	0.00041821
AATK	282.594	-1.14852	0.183803	-6.24861	4.14e-10	5.82e-08				AATK	282.594	-0.294557	0.212004	-1.38939	0.164713	0.279425
AATK-AS1	1.00902	-0.640257	0.347642	-1.84171	0.0655174	0.156297				AATK-AS1	1.00902	-0.756227	0.392311	-1.92762	0.0539025	0.115813
ABAT	647.559	-0.142051	0.141743	-1.00217	0.31626	0.486895				ABAT	647.559	-0.219896	0.158392	-1.38831	0.165044	0.279949
ABCA1	2145.98	-0.153046	0.121373	-1.26095	0.207326	0.362309				ABCA1	2145.98	0.27653	0.135125	2.04648	0.0407091	0.0925088
ABCA10	86.6179	-0.0627579	0.154889	-0.405179	0.685346	0.81417				ABCA10	86.6179	-0.317714	0.173143	-1.83498	0.066508	0.137326
ABCA12	1023.15	-0.384598	0.195658	-1.96566	0.0493376	0.126236				ABCA12	1023.15	-0.0940614	0.219964	-0.427621	0.668927	0.784291
ABCA13	1248.1	0.44431	0.281137	1.58041	0.114014	0.236377				ABCA13	1248.1	-1.04991	0.311227	-3.37346	0.000742286	0.00339579
ABCA2	2717.46	0.0435043	0.110395	0.39408	0.693522	0.819909				ABCA2	2717.46	0.013099	0.122906	0.106578	0.915124	0.95104
ABCA3	1674.43	0.383971	0.185886	2.06562	0.0388643	0.105811				ABCA3	1674.43	0.0366657	0.20881	0.175594	0.860613	0.922316
ABCA4	112.768	-0.881496	0.234255	-3.76298	0.000167899	0.0015704				ABCA4	104.325	-0.493395	0.258802	-1.90646	0.0565912	0.120306
ABCA5	1453.27	0.161775	0.100121	1.61579	0.106139	0.224094				ABCA5	1453.27	-0.462715	0.109452	-4.22755	2.36e-05	0.000186329
ABCA6	73.6236	0.391828	0.157018	2.49544	0.0125803	0.0451068				ABCA6	73.6236	0.484679	0.179012	2.70753	0.00677862	0.0214808
ABCA7	2561.2	0.105544	0.108771	0.97033	0.331882	0.503517				ABCA7	2561.2	-0.0714599	0.121734	-0.587019	0.557191	0.692477
ABCA8	84.209	-0.0753446	0.225004	-0.334859	0.737731	0.851225				ABCA8	84.209	-0.338407	0.263448	-1.28453	0.198956	0.323301
ABCA9	67.9712	-0.0593339	0.181197	-0.327456	0.743323	0.85448				ABCA9	67.9712	-0.0777682	0.211595	-0.367533	0.713222	0.819089
ABCB1	177.962	-0.194986	0.164242	-1.18718	0.235155	0.396585				ABCB1	177.962	0.187989	0.187295	1.00371	0.31552	0.458019
ABCB10	1319.19	-0.0716743	0.0643203	-1.11433	0.265136	0.432056				ABCB10	1319.19	-0.191973	0.0710443	-2.70216	0.00688908	0.0217789
ABCB11	11.1629	-0.771214	0.285843	-2.69804	0.00697499	0.0285664				ABCB11	11.1629	-1.1019	0.318593	-3.45863	0.00054292	0.00259554
ABCB4	29.1539	0.111688	0.136811	0.816368	0.414289	0.58822				ABCB4	29.1539	0.124514	0.152277	0.81768	0.41354	0.558613
ABCB5	6.10391	-0.588908	0.304754	-1.9324	0.05331	0.133979				ABCB5	6.10391	-0.656185	0.345064	-1.90163	0.0572193	0.121371
ABCB6	590.068	0.154834	0.0965385	1.60386	0.108745	0.228334				ABCB6	590.068	0.0598369	0.108188	0.553085	0.580205	0.711966
ABCB7	1154.58	0.0613066	0.0592031	1.03553	0.300421	0.470235				ABCB7	1154.58	-0.110337	0.0660034	-1.67169	0.0945856	0.180919
ABCB8	2215.71	0.121498	0.0679775	1.78732	0.073885	0.171175				ABCB8	2215.71	0.253996	0.0751408	3.38026	0.000724162	0.00332481
ABCB9	483.147	0.101573	0.0787266	1.2902	0.19698	0.34937				ABCB9	483.147	0.0515484	0.0875515	0.588778	0.55601	0.691594
ABCC1	6060.41	-0.21323	0.112205	-1.90036	0.0573853	0.141707				ABCC1	6060.41	-0.341224	0.123978	-2.7523	0.00591786	0.0192378
ABCC10	1569.6	-0.147723	0.065068	-2.27029	0.02319	0.071762				ABCC10	1569.6	0.146691	0.0729075	2.01202	0.044218	0.0987339
ABCC11	25.074	-0.301084	0.159293	-1.89013	0.0587412	0.14418				ABCC11	25.074	0.70076	0.174588	4.01379	5.98e-05	0.000406672
ABCC12	0.68641	1.16603	0.426578	2.73346	0.00626731	0.0263453				ABCC12	0.68641	1.46108	0.470296	3.10672	0.00189177	0.00742797
ABCC2	53.6376	-0.571889	0.155284	-3.68285	0.000230638	0.00200789				ABCC2	56.0018	0.992128	0.176261	5.62875	1.82e-08	3.9e-07
ABCC3	3141.44	-0.436362	0.198985	-2.19294	0.0283115	0.0836052				ABCC3	3141.44	-0.733969	0.220875	-3.32301	0.000890529	0.00395106
ABCC4	786.802	0.11495	0.134001	0.857827	0.390988	0.56522				ABCC4	786.802	-0.291212	0.149591	-1.94672	0.0515688	0.111855
ABCC5	7123.31	0.04037	0.148145	0.272503	0.785235	0.882515				ABCC5	7123.31	-0.140211	0.16533	-0.848068	0.3964	0.541855
ABCC6	201.957	-0.435828	0.188794	-2.30849	0.0209719	0.0666707				ABCC6	201.957	-0.633291	0.210048	-3.01499	0.00256991	0.00962609
ABCC8	7.42469	-1.10435	0.319862	-3.45259	0.000555225	0.00403758				ABCC8	8.16635	-1.5449	0.361417	-4.27457	1.92e-05	0.000155296
ABCC9	134.257	-0.427385	0.184419	-2.31747	0.0204782	0.0654467				ABCC9	118.852	-0.0939128	0.207441	-0.452722	0.650749	0.770104
ABCD1	1355.12	0.0432572	0.099741	0.433696	0.664509	0.798748				ABCD1	1355.12	0.244687	0.110602	2.21231	0.0269453	0.0660978
ABCD2	48.1567	0.508383	0.170707	2.9781	0.00290044	0.0144365				ABCD2	48.1567	1.04601	0.186439	5.61045	2.02e-08	4.27e-07
ABCD3	2893.76	-0.0995632	0.0696055	-1.43039	0.152604	0.291661				ABCD3	2893.76	-0.421368	0.0747707	-5.63546	1.75e-08	3.77e-07
ABCD4	2099.54	0.049574	0.058501	0.847405	0.396769	0.57097				ABCD4	2099.54	-0.0981166	0.0652031	-1.50478	0.13238	0.235602
ABCE1	4162.98	-0.0913549	0.0644461	-1.41754	0.156325	0.29649				ABCE1	4162.98	-0.150019	0.0717395	-2.09116	0.0365137	0.0847274
ABCF1	6599.64	0.0301525	0.0601504	0.501286	0.61617	0.76202				ABCF1	6599.64	0.172705	0.0668422	2.58378	0.0097725	0.0290431
ABCF2	3557.61	-0.0418615	0.0605438	-0.691424	0.489299	0.657003				ABCF2	3557.61	0.312173	0.0653476	4.77712	1.78e-06	2.05e-05
ABCF3	4869.84	0.0288098	0.059711	0.482487	0.62946	0.772414				ABCF3	4869.84	0.108472	0.066272	1.63678	0.101677	0.191525
ABCG1	1937.15	0.054759	0.123027	0.445097	0.656249	0.792307				ABCG1	1937.15	0.143999	0.137724	1.04556	0.295764	0.436169
ABCG2	127.351	-0.0974355	0.150846	-0.645928	0.518326	0.681008				ABCG2	115.025	-0.0968543	0.17305	-0.559689	0.575691	0.708341
ABCG4	17.8457	-0.229037	0.198239	-1.15536	0.247944	0.411873				ABCG4	17.8457	0.316448	0.221328	1.42977	0.152783	0.263572
ABCG5	7.66329	0.212496	0.173976	1.22141	0.221931	0.380084				ABCG5	6.97563	-0.186037	0.188204	-0.988486	0.322915	0.465888
ABCG8	1.89031	-0.386478	0.287266	-1.34537	0.178506	0.32623				ABCG8	1.89031	-1.06122	0.318221	-3.33487	0.000853397	0.00380752
ABHD1	29.9778	0.00352143	0.147632	0.0238527	0.98097	0.991943				ABHD1	29.9778	-0.0686507	0.165372	-0.415129	0.678047	0.791335
ABHD10	1628.3	0.124127	0.0608039	2.04144	0.0412072	0.110599				ABHD10	1628.3	-0.00856179	0.0683765	-0.125215	0.900353	0.944274
ABHD11	2312.95	0.131168	0.109662	1.19611	0.231654	0.392481				ABHD11	2312.95	-0.172955	0.122251	-1.41475	0.157141	0.269654
ABHD12	4614.49	0.214517	0.071046	3.0194	0.00253274	0.0130199				ABHD12	4614.49	0.251139	0.0790859	3.17552	0.00149567	0.00609686
ABHD12B	48.1532	-0.485064	0.187829	-2.58248	0.00980923	0.0372606				ABHD12B	48.4761	0.520619	0.211037	2.46695	0.0136269	0.0378993
ABHD13	1012.81	-0.142365	0.0537399	-2.64915	0.00806937	0.0319748				ABHD13	1012.81	-0.208782	0.0596057	-3.50272	0.000460537	0.00226805
ABHD14A	489.314	0.0521565	0.104303	0.500047	0.617042	0.762873				ABHD14A	489.314	0.374691	0.114802	3.26381	0.00109926	0.0047226
ABHD14A-ACY1	10.902	-0.0631571	0.107668	-0.58659	0.557479	0.714				ABHD14A-ACY1	10.902	0.0670826	0.120463	0.556871	0.577616	0.709695
ABHD14B	3028.67	0.156804	0.090881	1.72537	0.0844605	0.189409				ABHD14B	3028.67	0.124503	0.101877	1.22209	0.221672	0.351218
ABHD15	948.52	0.0832067	0.0568997	1.46234	0.143648	0.279348				ABHD15	948.52	-0.0681912	0.0635388	-1.07322	0.283172	0.422482
ABHD16A	405.938	-0.0553861	0.0698065	-0.793423	0.427531	0.600069				ABHD16A	405.938	-0.0249549	0.0781978	-0.319125	0.749632	0.847265
ABHD16B	0	NA	NA	NA	NA	NA				ABHD16B	0	NA	NA	NA	NA	NA
ABHD17A	1793.8	0.198666	0.0624955	3.17888	0.00147844	0.00860682				ABHD17A	1793.8	0.244511	0.0691746	3.5347	0.000408246	0.00205068
ABHD17B	1038.11	-0.0731222	0.0705652	-1.03624	0.300092	0.469806				ABHD17B	1038.11	-0.210275	0.0780688	-2.69346	0.00707156	0.0222466
ABHD17C	4223.63	-0.0719576	0.0984123	-0.731184	0.464666	0.634037				ABHD17C	4223.63	-0.205521	0.109014	-1.88528	0.0593923	0.125216
ABHD18	604.917	0.0327599	0.0631049	0.519134	0.603667	0.751736				ABHD18	604.917	-0.33066	0.068071	-4.85758	1.19e-06	1.45e-05
ABHD2	6795.6	-0.243809	0.11462	-2.1271	0.0334119	0.0943249				ABHD2	6795.6	-0.299207	0.12767	-2.34359	0.019099	0.0499636
ABHD3	1755	-0.0104899	0.0781409	-0.134243	0.89321	0.947409				ABHD3	1755	-0.212192	0.0864821	-2.4536	0.0141436	0.0390695
ABHD4	2698.12	-0.0200925	0.0904082	-0.222242	0.824125	0.906381				ABHD4	2698.12	0.0580165	0.100949	0.574709	0.565488	0.699424
ABHD5	1182.59	-0.126575	0.0850592	-1.48808	0.13673	0.269652				ABHD5	1182.59	0.0353161	0.0974295	0.362478	0.716995	0.822582
ABHD6	476.389	0.0485125	0.1024	0.473757	0.635673	0.77763				ABHD6	476.389	0.278347	0.113583	2.45061	0.0142616	0.0393042
ABHD8	916.758	0.100021	0.0838656	1.19264	0.233011	0.393977				ABHD8	916.758	0.143091	0.0930019	1.53858	0.123907	0.223688
ABI1	5011.83	-0.106189	0.0690763	-1.53727	0.124228	0.25156				ABI1	5011.83	-0.0454052	0.0774041	-0.586599	0.557473	0.692667
ABI2	2191.65	-0.0238429	0.0793267	-0.300566	0.763745	0.868103				ABI2	2191.65	-0.353591	0.0866921	-4.0787	4.53e-05	0.000321979
ABI3	652.827	0.709983	0.127461	5.57021	2.54e-08	1.51e-06				ABI3	652.827	1.1832	0.13513	8.75606	2.02e-18	5.44e-16
ABI3BP	525.676	0.482403	0.200525	2.4057	0.0161416	0.0545992				ABI3BP	525.676	0.603408	0.22824	2.64374	0.00819948	0.0251617
ABL1	4558.59	-0.208742	0.0638198	-3.27081	0.00107241	0.00671993				ABL1	4558.59	-0.113659	0.0729474	-1.55809	0.119211	0.217014
ABL2	1843.1	-0.244885	0.0716379	-3.41837	0.000629968	0.00446064				ABL2	1843.1	0.187511	0.0804016	2.33218	0.0196911	0.0511842
ABLIM1	11333.6	-0.0630045	0.112658	-0.559256	0.575987	0.730268				ABLIM1	11333.6	-0.48893	0.123218	-3.96802	7.25e-05	0.000477855
ABLIM2	773.36	-0.263241	0.142483	-1.84753	0.0646697	0.154796				ABLIM2	773.36	0.093103	0.159413	0.584038	0.559195	0.694245
ABLIM3	881.867	-0.277709	0.180533	-1.53827	0.123982	0.251237				ABLIM3	881.867	-0.559585	0.200926	-2.78503	0.00535228	0.0176819
ABO	1812.23	-0.384491	0.223897	-1.71727	0.0859305	0.191694				ABO	1812.23	-0.759786	0.248388	-3.05887	0.00222171	0.00850853
ABR	4913.28	-0.174052	0.0921959	-1.88785	0.0590463	0.144817				ABR	4913.28	-0.0744576	0.10294	-0.723309	0.46949	0.613766
ABRA	2.38793	-0.300134	0.194861	-1.54025	0.1235	0.250459				ABRA	2.14233	0.120277	0.197702	0.608373	0.54294	0.681143
ABRACL	2407.17	0.0264361	0.0872567	0.302969	0.761914	0.866929				ABRACL	2407.17	0.0393899	0.0974325	0.404279	0.686007	0.797318
ABT1	2426.93	0.0857675	0.0561695	1.52694	0.126776	0.255395				ABT1	2426.93	0.210714	0.0621268	3.39168	0.000694667	0.00320599
ABTB1	2160.78	0.0429545	0.0997197	0.430752	0.666649	0.800414				ABTB1	2160.78	0.339314	0.110455	3.07197	0.00212648	0.00819309
ABTB2	603.291	-0.603791	0.119338	-5.0595	4.2e-07	1.38e-05				ABTB2	603.291	-0.303264	0.136903	-2.21517	0.0267481	0.0657271
AC002094.3	0	NA	NA	NA	NA	NA				AC002094.3	0	NA	NA	NA	NA	NA
AC002310.4	0.00929735	-0.0654168	2.97777	-0.0219684	0.982473	NA				AC002310.4	0.00929735	0.146331	3.3264	0.0439907	0.964912	NA
AC002310.5	1.21546	-0.0216682	0.216112	-0.100264	0.920135	0.961967				AC002310.5	1.21546	-0.55529	0.24059	-2.30804	0.0209972	0.0539983
AC002429.2	0.299627	-0.468781	0.488312	-0.960003	0.337054	0.508889				AC002429.2	0.299627	-0.0277643	0.539487	-0.0514643	0.958956	0.977933
AC002985.1	0.806839	0.433801	0.267688	1.62055	0.105114	0.22252				AC002985.1	0.806839	0.784619	0.291446	2.69216	0.00709912	0.0223225
AC002996.1	0.442909	0.410395	0.324196	1.26589	0.205553	0.3601				AC002996.1	0.442909	-0.127349	0.363802	-0.350051	0.7263	0.829276
AC003002.1	347.575	-0.171944	0.155216	-1.10777	0.267961	0.435322				AC003002.1	347.575	0.572536	0.171243	3.34342	0.000827536	0.00371207
AC003002.2	0.0036375	-0.0258911	2.97777	-0.00869479	0.993063	NA				AC003002.2	0.0036375	0.244976	3.3264	0.0736459	0.941292	NA
AC003002.3	3.06652	0.0557683	0.168568	0.330837	0.740768	0.852773				AC003002.3	3.06652	-0.374792	0.184637	-2.02989	0.0423676	0.0954158
AC003002.4	4.2164	-0.25431	0.161877	-1.57101	0.116181	0.239579				AC003002.4	4.2164	-0.191511	0.183273	-1.04495	0.296047	0.436435
AC003005.1	0.244419	0.406832	0.496204	0.819888	0.41228	0.586238				AC003005.1	0.244419	0.433095	0.557304	0.777125	0.437085	0.582151
AC003006.1	0.775829	-0.255903	0.342208	-0.747799	0.454581	0.624899				AC003006.1	0.775829	-0.588489	0.368626	-1.59644	0.110391	0.204263
AC003688.1	0.140105	-0.00569451	0.685217	-0.00831052	0.993369	0.996633				AC003688.1	0.140105	-0.148613	0.765121	-0.194235	0.845992	0.913045
AC004076.1	1.18537	-0.132318	0.233409	-0.566895	0.570786	0.725883				AC004076.1	1.18537	0.358822	0.26465	1.35583	0.175152	0.292732
AC004080.3	0.362561	-0.401881	0.481784	-0.834151	0.404196	0.578481				AC004080.3	0.362561	-0.241744	0.541403	-0.446514	0.655226	0.773472
AC004223.3	0.264022	-0.142908	0.344398	-0.414951	0.678178	0.809396				AC004223.3	0.264022	0.101085	0.383463	0.263609	0.792081	0.87811
AC004233.2	30.9679	-1.15574	0.248493	-4.65098	3.3e-06	7.06e-05				AC004233.2	25.3324	0.0554439	0.267569	0.207213	0.835843	0.906133
AC004691.2	1.52745	-0.562503	0.212005	-2.65325	0.00797213	0.0317193				AC004691.2	1.52745	-0.797997	0.241044	-3.31059	0.000931009	0.00410684
AC004754.1	11.3336	0.0588512	0.174589	0.337084	0.736053	0.849956				AC004754.1	10.505	0.0447078	0.190933	0.234155	0.814865	0.893472
AC004805.1	0.280925	0.534709	0.657908	0.812742	0.416366	0.590228				AC004805.1	0.280925	0.340094	0.7399	0.459648	0.645769	0.766392
AC004832.3	0.0424242	-0.0456541	1.8901	-0.0241543	0.98073	0.991832				AC004832.3	0.0424242	0.294816	2.10951	0.139756	0.888853	0.938948
AC004997.1	7.1249	-0.0896926	0.129031	-0.695125	0.486977	0.65522				AC004997.1	7.1249	0.263918	0.144003	1.83273	0.0668428	0.137839
AC005020.2	2.64011	-0.0708574	0.194951	-0.363462	0.71626	0.835692				AC005020.2	2.64011	-0.66531	0.217681	-3.05635	0.00224052	0.00856856
AC005154.6	1.29011	0.0649476	0.210299	0.308835	0.757447	0.86422				AC005154.6	1.29011	0.328743	0.234444	1.40222	0.160849	0.274245
AC005258.1	0.0252489	-0.0654168	2.86911	-0.0228004	0.981809	NA				AC005258.1	0.0252489	0.294609	3.2004	0.0920537	0.926655	NA
AC005324.3	17.3892	-0.31749	0.190032	-1.67072	0.0947776	0.206068				AC005324.3	17.3892	0.18673	0.212802	0.877483	0.380224	0.524961
AC005324.4	1.04873	0.0546794	0.281334	0.194358	0.845896	0.919743				AC005324.4	1.04873	0.0212356	0.312197	0.0680199	0.94577	0.969124
AC005520.1	2.83597	-0.0685164	0.151596	-0.451968	0.651292	0.789552				AC005520.1	2.83597	-0.434074	0.168507	-2.576	0.00999514	0.0295709
AC005670.2	0	NA	NA	NA	NA	NA				AC005670.2	0	NA	NA	NA	NA	NA
AC005697.1	0.14873	0.0548841	0.670386	0.0818693	0.934751	0.970429				AC005697.1	0.14873	0.0245465	0.748578	0.0327908	0.973841	0.985121
AC005702.2	0.242636	0.464342	0.373209	1.24419	0.213431	0.36994				AC005702.2	0.242636	-0.0792937	0.41788	-0.189752	0.849503	0.915251
AC005726.2	115.726	0.0791798	0.0938462	0.843719	0.398826	0.573075				AC005726.2	115.726	0.182796	0.104128	1.75549	0.0791758	0.157298
AC005779.2	1.6854	0.0634483	0.197045	0.321999	0.747453	0.857114				AC005779.2	1.6854	0.173452	0.221901	0.781665	0.434412	0.579438
AC005832.4	0.462297	0.245581	0.271668	0.903977	0.366007	0.538775				AC005832.4	0.462297	-0.177905	0.305807	-0.581757	0.560731	0.695477
AC005833.1	0	NA	NA	NA	NA	NA				AC005833.1	0	NA	NA	NA	NA	NA
AC005833.3	1.20301	0.428861	0.199041	2.15463	0.0311908	0.0895892				AC005833.3	1.20301	0.0910781	0.221346	0.411474	0.680725	0.793252
AC005837.2	0.0127501	-0.0456539	2.97777	-0.0153316	0.987768	NA				AC005837.2	0.0127501	0.220314	3.3264	0.0662321	0.947193	NA
AC005885.1	0.265376	0.506805	0.687219	0.737472	0.460835	0.630971				AC005885.1	0.381767	-0.213202	0.783282	-0.27219	0.785476	0.873264
AC005943.1	0.602911	0.302429	0.262887	1.15041	0.249973	0.414536				AC005943.1	0.602911	-0.335447	0.289542	-1.15854	0.246643	0.380146
AC006030.1	3.56718	-0.173735	0.154526	-1.12431	0.260883	0.427236				AC006030.1	3.56718	-0.231019	0.174833	-1.32137	0.186378	0.307674
AC006254.1	55.5207	0.082109	0.111647	0.735434	0.462075	0.63199				AC006254.1	55.5207	0.26905	0.123881	2.17184	0.0298678	0.0718978
AC006269.1	0.527947	-0.183689	0.330882	-0.55515	0.578792	0.732222				AC006269.1	0.527947	0.427578	0.36819	1.1613	0.245521	0.378751
AC006486.1	0.186959	-0.245615	0.661158	-0.371492	0.710271	0.830873				AC006486.1	0.186959	-0.0969014	0.738269	-0.131255	0.895574	0.942509
AC006538.2	0.0144508	-0.0851797	2.97777	-0.0286052	0.977179	NA				AC006538.2	0.0144508	0.146331	3.3264	0.0439907	0.964912	NA
AC006978.2	4.5081	-0.0671972	0.148969	-0.451083	0.65193	0.789617				AC006978.2	4.5081	0.222069	0.164676	1.34852	0.177491	0.296012
AC007040.2	7.8612	0.0398276	0.169802	0.234554	0.814555	0.900779				AC007040.2	7.8612	0.164132	0.188138	0.872406	0.382987	0.527687
AC007192.1	4.85317	0.642565	0.185259	3.46847	0.000523431	0.00384292				AC007192.1	4.85317	0.522395	0.208771	2.50224	0.0123409	0.0349581
AC007375.2	0.0804184	-0.203758	0.989595	-0.2059	0.836869	0.914378				AC007375.2	0.0804184	0.122165	1.10482	0.110574	0.911954	0.949095
AC007731.5	0.0826348	0.0933334	1.07266	0.0870108	0.930663	0.967768				AC007731.5	0.0826348	0.122777	1.19754	0.102524	0.918341	0.952939
AC007906.2	586.628	0.724721	0.237162	3.0558	0.00224459	0.0118705				AC007906.2	586.628	-0.117396	0.267353	-0.439106	0.660585	0.777651
AC007998.2	2.16462	0.0676885	0.184558	0.366759	0.713799	0.83381				AC007998.2	2.16462	0.275452	0.204561	1.34655	0.178126	0.296794
AC008073.3	1.05941	0.634099	0.463251	1.3688	0.171061	0.316648				AC008073.3	1.0651	-0.715719	0.511352	-1.39966	0.161616	0.275331
AC008162.2	0	NA	NA	NA	NA	NA				AC008162.2	0	NA	NA	NA	NA	NA
AC008403.1	0.153196	0.0750612	0.542063	0.138473	0.889867	0.945452				AC008403.1	0.153196	0.0754789	0.605275	0.124702	0.90076	0.944274
AC008481.3	0.248213	-0.100548	0.375336	-0.267887	0.788786	0.885029				AC008481.3	0.248213	-0.0426681	0.418967	-0.101841	0.918883	0.953237
AC008537.1	0.00566024	-0.0851797	2.97777	-0.0286052	0.977179	NA				AC008537.1	0.00566024	0.220314	3.3264	0.0662321	0.947193	NA
AC008560.1	165.68	0.0821633	0.0768759	1.06878	0.285169	0.453996				AC008560.1	165.68	-0.0638854	0.0858245	-0.744372	0.456651	0.601547
AC008575.1	0.0888632	0.0539066	0.803321	0.0671046	0.946498	0.97648				AC008575.1	0.0888632	0.123124	0.896903	0.137276	0.890812	0.939772
AC008575.2	3.79652	-0.206937	0.127052	-1.62876	0.103364	0.219908				AC008575.2	3.79652	-0.131486	0.143161	-0.918447	0.358385	0.503077
AC008687.1	0.306595	-1.088	0.75863	-1.43417	0.151524	0.290296				AC008687.1	0.306595	-0.444456	0.850567	-0.52254	0.601294	0.729598
AC008687.4	8.85077	-0.225597	0.177682	-1.26967	0.204203	0.358346				AC008687.4	8.85077	-0.384726	0.19767	-1.9463	0.0516183	0.11195
AC008695.1	0.012351	-0.0654168	2.97777	-0.0219684	0.982473	NA				AC008695.1	0.012351	0.170992	3.3264	0.0514045	0.959003	NA
AC008750.8	6.91895	0.142771	0.127517	1.11962	0.262875	0.429579				AC008750.8	6.91895	0.581474	0.139174	4.17804	2.94e-05	0.000223761
AC008758.1	0.0300423	0.0136347	2.28709	0.00596157	0.995243	NA				AC008758.1	0.0300423	0.0970081	2.55185	0.0380148	0.969676	NA
AC008758.4	8.897	0.360183	0.166268	2.16628	0.0302896	0.0878404				AC008758.4	8.897	0.460483	0.184437	2.4967	0.0125354	0.0354149
AC008758.5	0.304927	-0.0932662	0.432532	-0.215628	0.829278	0.909589				AC008758.5	0.304927	-0.426169	0.483869	-0.880751	0.378452	0.523156
AC008758.6	1.548	0.153276	0.206795	0.741196	0.458575	0.62862				AC008758.6	1.548	-0.293644	0.233204	-1.25918	0.207967	0.334251
AC008763.2	1.22241	0.428866	0.200296	2.14116	0.0322614	0.0917956				AC008763.2	1.22241	0.00840789	0.227442	0.0369672	0.970511	0.983898
AC008763.3	0.0531464	-0.0258912	1.53177	-0.0169027	0.986514	0.993885				AC008763.3	0.0531464	0.12167	1.70976	0.0711618	0.943269	0.967821
AC008764.1	0.0591774	-0.08518	1.36329	-0.0624812	0.95018	0.978308				AC008764.1	0.0591774	0.14684	1.5218	0.0964909	0.923131	0.955673
AC008764.4	2.72206	0.14891	0.139232	1.06951	0.284839	0.453645				AC008764.4	2.72206	0.0595167	0.155405	0.382979	0.701736	0.810279
AC008770.2	1.47391	0.23878	0.310486	0.769051	0.441863	0.613518				AC008770.2	1.47391	0.300387	0.34484	0.871091	0.383704	0.528354
AC008770.3	3.7611	-0.0418267	0.142759	-0.292989	0.769531	0.871548				AC008770.3	3.7611	-0.331809	0.157976	-2.10037	0.0356966	0.083134
AC008878.1	0.482121	-0.636135	0.285248	-2.23011	0.02574	0.0775811				AC008878.1	0.482121	0.217215	0.321971	0.674641	0.499904	0.642023
AC008878.2	0.375448	-0.40795	0.303895	-1.3424	0.179466	0.32745				AC008878.2	0.375448	-0.178516	0.339167	-0.526336	0.598655	0.727827
AC008878.3	0.665786	0.422393	0.372937	1.13261	0.257377	0.422654				AC008878.3	0.665786	0.732444	0.434253	1.68667	0.0916659	0.176587
AC008982.1	0.663408	0.0313725	0.2425	0.129371	0.897064	0.949601				AC008982.1	0.663408	0.32736	0.271685	1.20493	0.228231	0.358726
AC009014.1	4.88558	0.11247	0.363843	0.309118	0.757232	0.864078				AC009014.1	5.54933	-1.13035	0.415449	-2.72079	0.00651256	0.0208276
AC009086.2	0.0509355	0.0531605	1.5321	0.0346979	0.972321	0.988914				AC009086.2	0.0509355	0.369419	1.7101	0.216022	0.82897	0.901801
AC009119.2	10.4922	0.247814	0.130465	1.89946	0.057504	0.141908				AC009119.2	10.4922	0.462175	0.142549	3.24222	0.00118603	0.00502875
AC009133.6	0.0290198	-0.164231	2.53335	-0.0648278	0.948311	NA				AC009133.6	0.0290198	0.146331	2.82634	0.051774	0.958709	NA
AC009163.2	0.231035	-0.42829	0.770505	-0.555856	0.578309	0.732098				AC009163.2	0.231035	-0.4579	0.865142	-0.529277	0.596613	0.726385
AC009163.4	0.381637	0.452203	0.310913	1.45444	0.145826	0.28229				AC009163.4	0.381637	0.0207954	0.348634	0.0596482	0.952436	0.973726
AC009336.2	9.11963	-0.341321	0.201062	-1.69759	0.0895844	0.197781				AC009336.2	9.11963	-0.201347	0.226931	-0.887259	0.374939	0.520067
AC009690.1	9.11283	0.186094	0.169817	1.09585	0.273145	0.440903				AC009690.1	9.11283	-0.383302	0.187872	-2.04023	0.0413273	0.093591
AC009690.3	0.0325108	0.0136347	2.0794	0.00655703	0.994768	NA				AC009690.3	0.0325108	0.195654	2.32034	0.0843212	0.932801	NA
AC009779.3	76.9976	0.217673	0.0877018	2.48197	0.0130658	0.0463456				AC009779.3	76.9976	-0.116475	0.0987118	-1.17995	0.238019	0.370226
AC010132.3	2.7432	0.000788951	0.175258	0.00450166	0.996408	0.998151				AC010132.3	2.7432	-0.29172	0.19389	-1.50456	0.132437	0.235659
AC010255.3	1.50256	-0.240236	0.287411	-0.835862	0.403232	0.577583				AC010255.3	1.50256	-0.271545	0.324962	-0.835621	0.403368	0.548322
AC010319.2	0	NA	NA	NA	NA	NA				AC010319.2	0	NA	NA	NA	NA	NA
AC010323.1	1.06157	0.0812008	0.224538	0.361635	0.717625	0.836711				AC010323.1	1.06157	-0.291603	0.251265	-1.16054	0.24583	0.379075
AC010325.1	4.59494	0.301449	0.150842	1.99844	0.045669	0.119423				AC010325.1	4.59494	0.246732	0.168712	1.46245	0.143618	0.251005
AC010326.2	2.1011	0.081533	0.192357	0.423862	0.671667	0.804658				AC010326.2	2.1011	0.494148	0.213076	2.31912	0.0203885	0.0526596
AC010327.1	0.377348	0.127041	0.476635	0.266537	0.789826	0.885404				AC010327.1	0.377348	0.436806	0.530292	0.823709	0.410105	0.555268
AC010422.3	20.4735	0.469554	0.110202	4.26085	2.04e-05	0.000301581				AC010422.3	20.4735	0.600839	0.120708	4.97761	6.44e-07	8.67e-06
AC010422.5	0.103308	0.113682	0.757231	0.150128	0.880663	0.940764				AC010422.5	0.103308	0.373543	0.845418	0.441844	0.658602	0.776232
AC010422.6	41.9398	-0.108475	0.0903128	-1.2011	0.229711	0.390019				AC010422.6	41.9398	-0.261132	0.0995921	-2.62202	0.00874113	0.0265259
AC010463.1	0.0644558	-0.0456541	1.43263	-0.0318674	0.974578	0.989221				AC010463.1	0.0644558	0.344547	1.59918	0.215453	0.829415	0.902079
AC010522.1	7.02696	-0.403188	0.144924	-2.78207	0.00540132	0.0233697				AC010522.1	7.02696	-0.400555	0.162373	-2.46689	0.0136293	0.0379003
AC010531.1	3.71807	0.157999	0.161577	0.977857	0.328145	0.499392				AC010531.1	3.71807	0.301021	0.179801	1.67419	0.0940936	0.180213
AC010542.3	0.326656	-0.102839	0.325995	-0.315463	0.75241	0.860938				AC010542.3	0.326656	0.418722	0.363825	1.15089	0.249779	0.38368
AC010547.4	0.0694695	0.21205	1.23231	0.172076	0.863378	0.930245				AC010547.4	0.0694695	0.27117	1.37568	0.197116	0.843737	0.911485
AC010547.5	0.762072	0.33125	0.249491	1.32771	0.184275	0.33352				AC010547.5	0.762072	-0.360084	0.280296	-1.28466	0.198912	0.323258
AC010615.4	0.0165505	-0.0456539	2.97777	-0.0153316	0.987768	NA				AC010615.4	0.0165505	0.170992	3.3264	0.0514045	0.959003	NA
AC010616.1	14.8226	0.38499	0.1599	2.4077	0.0160535	0.0543782				AC010616.1	14.8226	0.329841	0.178958	1.84312	0.0653115	0.135323
AC010619.1	0.00893319	-0.0654168	2.97777	-0.0219684	0.982473	NA				AC010619.1	0.00893319	0.220314	3.3264	0.0662321	0.947193	NA
AC010646.1	0.0346674	-0.0654169	2.26683	-0.0288584	0.976978	NA				AC010646.1	0.0346674	-0.00163738	2.52936	-0.00064735	0.999483	NA
AC011005.1	12.3155	0.310428	0.116235	2.6707	0.00756941	0.0304785				AC011005.1	12.3155	0.137001	0.129022	1.06185	0.288304	0.428068
AC011195.2	0.997574	-0.617862	0.297152	-2.07928	0.0375916	0.10334				AC011195.2	0.997574	0.792479	0.333032	2.37959	0.0173321	0.0462141
AC011346.1	3.54157	-2.37561	0.826851	-2.87309	0.00406482	0.0187482				AC011346.1	2.53468	0.477173	0.93917	0.508079	0.611398	0.737793
AC011448.1	61.4585	0.40765	0.0916101	4.44983	8.59e-06	0.000151512				AC011448.1	61.4585	0.344122	0.103049	3.33941	0.000839564	0.00375897
AC011452.1	0	NA	NA	NA	NA	NA				AC011452.1	0	NA	NA	NA	NA	NA
AC011455.3	0.165673	-0.0407013	0.552661	-0.073646	0.941292	0.973684				AC011455.3	0.165673	0.247014	0.617023	0.400332	0.688912	0.799736
AC011462.1	2.29203	-0.365351	0.226103	-1.61586	0.106124	0.224087				AC011462.1	2.29203	-0.176604	0.25427	-0.694553	0.487335	0.630265
AC011473.4	108.438	-0.528793	0.367999	-1.43694	0.150734	0.289306				AC011473.4	108.438	1.29552	0.408651	3.17024	0.00152315	0.00619168
AC011479.1	52.7679	0.0414111	0.193736	0.21375	0.830742	0.910247				AC011479.1	52.7679	0.868024	0.209401	4.14528	3.39e-05	0.00025307
AC011498.1	4331.77	0.248008	0.0683538	3.62829	0.000285305	0.00237352				AC011498.1	4331.77	0.266379	0.0765606	3.47933	0.000502677	0.00243848
AC011498.5	8.45534	-0.0689829	0.257397	-0.268001	0.788698	0.884996				AC011498.5	8.45534	-0.626823	0.279354	-2.24383	0.0248436	0.0618599
AC011499.1	2.10758	0.0871941	0.187337	0.465441	0.641616	0.782496				AC011499.1	2.10758	-0.227676	0.208375	-1.09263	0.274557	0.412559
AC011511.1	21.1191	0.308817	0.122613	2.51862	0.0117814	0.0429924				AC011511.1	21.1191	-0.142905	0.137952	-1.0359	0.300247	0.440966
AC011511.4	1.67432	0.453006	0.169128	2.67847	0.00739586	0.0299374				AC011511.4	1.67432	0.296275	0.187561	1.57962	0.114195	0.209961
AC011530.1	0.752205	0.23851	0.234401	1.01753	0.308902	0.479153				AC011530.1	0.752205	0.58875	0.260449	2.26052	0.023789	0.0596535
AC011604.2	3.43769	-0.929044	0.528191	-1.75892	0.0785917	0.179287				AC011604.2	3.10943	-0.835825	0.583772	-1.43177	0.152211	0.262751
AC012184.2	0.0526167	-0.0258912	1.36681	-0.0189427	0.984887	0.993463				AC012184.2	0.0526167	0.221237	1.52571	0.145007	0.884706	0.93669
AC012254.2	0.0142693	-0.0258911	2.97777	-0.00869479	0.993063	NA				AC012254.2	0.0142693	0.220314	3.3264	0.0662321	0.947193	NA
AC012309.1	1.25789	0.405198	0.204278	1.98356	0.0473045	0.122259				AC012309.1	1.25789	0.226209	0.230848	0.979901	0.327135	0.470508
AC012531.3	0.133302	-0.344504	0.743199	-0.463543	0.642976	0.783399				AC012531.3	0.133302	0.523833	0.829776	0.631294	0.527848	0.667686
AC012651.1	74.8378	-0.188602	0.131642	-1.43268	0.151948	0.290814				AC012651.1	74.8378	-0.267799	0.146434	-1.82881	0.0674286	0.138747
AC013269.1	0.00687138	-0.0456539	2.97777	-0.0153316	0.987768	NA				AC013269.1	0.00687138	0.269637	3.3264	0.0810598	0.935394	NA
AC013394.1	26.2554	0.0846133	0.0923084	0.916637	0.359333	0.53237				AC013394.1	26.2554	-0.108182	0.102837	-1.05198	0.292808	0.433006
AC013470.2	4.57549	-0.519158	0.272077	-1.90813	0.0563745	0.139825				AC013470.2	4.57549	-1.31016	0.299939	-4.3681	1.25e-05	0.000108028
AC015688.5	0.804829	0.521038	0.242651	2.14727	0.0317717	0.090699				AC015688.5	0.804829	-0.0528638	0.269801	-0.195937	0.84466	0.912019
AC015813.2	1.68906	0.650495	0.234632	2.77241	0.00556432	0.0239587				AC015813.2	1.68906	0.0180142	0.264907	0.0680019	0.945784	0.969124
AC017083.4	0.856227	-0.0884466	0.207709	-0.42582	0.670239	0.803514				AC017083.4	0.856227	0.229076	0.22611	1.01312	0.311005	0.453082
AC018512.1	0	NA	NA	NA	NA	NA				AC018512.1	0	NA	NA	NA	NA	NA
AC018523.2	0.578706	-0.124567	0.267668	-0.46538	0.641659	0.7825				AC018523.2	0.578706	-0.160657	0.302054	-0.531884	0.594807	0.724808
AC018554.3	0.0769281	0.132606	1.2875	0.102995	0.917967	0.961469				AC018554.3	0.0769281	0.369408	1.43729	0.257017	0.797165	0.881752
AC018630.6	5.10802	0.234136	0.148513	1.57653	0.114903	0.237585				AC018630.6	5.10802	-0.211217	0.16673	-1.26682	0.205221	0.330674
AC018709.1	0.0385296	-0.104943	2.4789	-0.0423343	0.966232	NA				AC018709.1	0.0385296	-0.00163738	2.76586	-0.000591998	0.999528	0.999762
AC018755.2	0.0351858	-0.0851799	1.91085	-0.0445769	0.964445	NA				AC018755.2	0.0351858	0.220623	2.13243	0.103461	0.917597	NA
AC020636.2	0.491021	0.283027	0.362339	0.781113	0.434736	0.606707				AC020636.2	0.491021	-0.105902	0.409739	-0.258461	0.796051	0.881132
AC020909.1	0.0445912	0.0333976	1.53971	0.0216909	0.982695	0.992506				AC020909.1	0.0445912	0.220828	1.71855	0.128496	0.897756	0.943165
AC020914.1	0.51973	-0.849175	0.85433	-0.993966	0.320239	0.491162				AC020914.1	0.51973	-2.0942	0.933688	-2.24293	0.0249013	0.0619874
AC020915.1	795.268	0.0412294	0.0557561	0.73946	0.459628	0.629678				AC020915.1	795.268	0.167431	0.0615999	2.71804	0.00656701	0.0209596
AC020915.2	29.1926	-0.0320347	0.100948	-0.317338	0.750987	0.859774				AC020915.2	29.1926	-0.0123752	0.11286	-0.10965	0.912687	0.949333
AC020922.1	19.0349	-0.0271116	0.235165	-0.115287	0.908217	0.956498				AC020922.1	19.0349	0.654553	0.261864	2.49959	0.0124336	0.0351792
AC022335.1	0.639714	-1.21374	0.624582	-1.94328	0.0519825	0.131264				AC022335.1	0.639714	-1.35061	0.701834	-1.9244	0.0543044	0.116533
AC022384.1	0.0646833	0.0137633	1.12386	0.0122464	0.990229	0.995142				AC022384.1	0.0646833	0.320481	1.25464	0.255436	0.798386	0.882513
AC022400.6	11.2856	0.101233	0.0950289	1.06529	0.286744	0.45573				AC022400.6	11.2856	0.141936	0.106094	1.33784	0.18095	0.300452
AC022826.2	0.0994651	0.113564	0.779017	0.145779	0.884096	0.942519				AC022826.2	0.0994651	0.0987124	0.869785	0.113491	0.909642	0.947886
AC023055.1	19.1548	0.169977	0.0713716	2.38157	0.0172389	0.0573969				AC023055.1	19.1548	0.0766232	0.0804165	0.95283	0.340676	0.484717
AC023509.3	99.9201	0.346965	0.0926307	3.74568	0.000179907	0.00165359				AC023509.3	99.9201	0.454763	0.102715	4.42742	9.54e-06	8.66e-05
AC024270.1	2658.08	-0.00887856	0.0988672	-0.0898029	0.928444	0.966775				AC024270.1	2658.08	-0.205243	0.109785	-1.8695	0.0615531	0.129047
AC024592.3	0.337466	0.396221	0.346556	1.14331	0.252909	0.417821				AC024592.3	0.337466	0.106132	0.383646	0.27664	0.782056	0.870733
AC024940.1	304.449	0.690766	0.229345	3.0119	0.00259614	0.0132886				AC024940.1	304.449	0.012469	0.258756	0.0481885	0.961566	0.979572
AC025165.3	3.69999	0.0105118	0.129044	0.0814592	0.935077	0.970616				AC025165.3	3.69999	0.25858	0.142241	1.8179	0.069079	0.141292
AC025263.2	0.0289724	-0.045654	2.53191	-0.0180315	0.985614	NA				AC025263.2	0.0289724	0.0476853	2.82473	0.0168814	0.986531	NA
AC025283.2	3.08323	-0.478222	0.19073	-2.50733	0.0121647	0.0440587				AC025283.2	3.08323	-0.0465255	0.21769	-0.213724	0.830762	0.902695
AC025594.3	454.432	-0.586631	0.175453	-3.34351	0.000827244	0.00552981				AC025594.3	454.432	-0.186586	0.197783	-0.943387	0.345483	0.489945
AC026461.4	0.613579	-0.687376	0.444721	-1.54563	0.122193	0.248478				AC026461.4	0.613579	-0.582512	0.496824	-1.17247	0.241008	0.373599
AC026464.1	0.20511	-0.266283	0.551317	-0.482995	0.629099	0.772207				AC026464.1	0.20511	0.0308655	0.61532	0.0501617	0.959994	0.978626
AC026464.3	0	NA	NA	NA	NA	NA				AC026464.3	0	NA	NA	NA	NA	NA
AC026464.4	1.30925	-0.170061	0.203652	-0.835057	0.403686	0.578059				AC026464.4	1.30925	0.435454	0.224861	1.93655	0.0528	0.113983
AC026786.1	0.00270563	-0.0654168	2.97777	-0.0219684	0.982473	NA				AC026786.1	0.00270563	0.195653	3.3264	0.0588183	0.953097	NA
AC026954.2	1.60808	0.110736	0.201128	0.550573	0.581926	0.734918				AC026954.2	1.60808	0.0103971	0.226477	0.0459077	0.963384	0.980618
AC027796.3	10.7906	-0.163812	0.135171	-1.21189	0.225556	0.384535				AC027796.3	10.7906	-0.533175	0.149146	-3.57486	0.000350417	0.00180282
AC034102.2	0.0577377	0.0136347	1.2936	0.0105401	0.99159	0.99593				AC034102.2	0.0577377	0.146633	1.44404	0.101544	0.919119	0.953378
AC036214.3	11.759	0.21737	0.126806	1.7142	0.0864924	0.192745				AC036214.3	11.759	-0.0791867	0.143061	-0.553518	0.579909	0.711748
AC037459.1	2.68559	-0.0920054	0.154888	-0.594013	0.552504	0.709959				AC037459.1	2.68559	0.231131	0.173219	1.33433	0.182097	0.302041
AC040162.1	194.314	0.546343	0.0931461	5.86544	4.48e-09	3.82e-07				AC040162.1	194.314	0.731989	0.101631	7.20245	5.91e-13	3.45e-11
AC040162.4	1.64395	0.937605	0.402298	2.33062	0.0197734	0.0636872				AC040162.4	1.45481	1.37076	0.432975	3.16592	0.00154593	0.00626566
AC046185.1	0.00741972	-0.0258911	2.97777	-0.00869479	0.993063	NA				AC046185.1	0.00741972	0.244976	3.3264	0.0736459	0.941292	NA
AC048338.1	0.138266	0.0941441	0.590295	0.159487	0.873286	0.936843				AC048338.1	0.138266	0.249323	0.659053	0.378305	0.705204	0.812864
AC053481.5	0	NA	NA	NA	NA	NA				AC053481.5	0	NA	NA	NA	NA	NA
AC055811.2	2.84403	0.220715	0.157266	1.40345	0.160483	0.30256				AC055811.2	2.84403	-0.266476	0.177249	-1.5034	0.132737	0.23604
AC067968.1	0.31068	-0.122446	0.353245	-0.346632	0.728868	0.844891				AC067968.1	0.31068	0.688671	0.392685	1.75375	0.0794736	0.157661
AC068234.1	0.0212267	-0.124705	2.91807	-0.0427355	0.965912	NA				AC068234.1	0.0212267	0.220315	3.2548	0.0676891	0.946033	NA
AC068533.4	3.14332	-0.398366	0.165956	-2.40043	0.0163759	0.0552453				AC068533.4	3.14332	-0.772762	0.183989	-4.20005	2.67e-05	0.000207222
AC068580.4	27.428	0.161531	0.149146	1.08304	0.278789	0.447026				AC068580.4	27.428	-0.548466	0.165789	-3.30822	0.000938922	0.00413411
AC068775.1	26.3362	-0.0626925	0.146428	-0.428147	0.668544	0.801985				AC068775.1	26.3362	0.0611252	0.163726	0.373338	0.708897	0.815788
AC068775.2	0.854819	-0.0848943	0.326951	-0.259655	0.79513	0.888677				AC068775.2	0.854819	1.13046	0.364118	3.10464	0.00190508	0.00747153
AC068790.8	2.95595	0.209918	0.16425	1.27805	0.201233	0.354813				AC068790.8	2.95595	-0.333858	0.183915	-1.81528	0.0694811	0.141947
AC068896.1	14.3296	-0.0837154	0.115125	-0.727172	0.46712	0.636386				AC068896.1	14.3296	-0.527611	0.125344	-4.20929	2.56e-05	0.000200146
AC068946.1	24.5265	-0.270525	0.136303	-1.98473	0.0471742	0.122106				AC068946.1	24.5265	-0.1732	0.152977	-1.1322	0.257551	0.392777
AC069257.3	0.523357	-0.110796	0.339619	-0.326237	0.744245	0.85519				AC069257.3	0.523357	-0.367192	0.374553	-0.980348	0.326914	0.470275
AC069368.1	1.58494	-0.584991	0.200839	-2.91274	0.00358268	0.016996				AC069368.1	1.58494	-0.355363	0.226609	-1.56817	0.11684	0.213622
AC069503.2	11.8401	0.426602	0.106202	4.01689	5.9e-05	0.000694645				AC069503.2	11.8401	0.46089	0.118752	3.88112	0.000103978	0.000649618
AC072022.1	20.079	-0.0762234	0.133279	-0.571906	0.567385	0.722718				AC072022.1	20.079	-0.127446	0.148536	-0.858014	0.390885	0.535963
AC073082.1	0.333399	0.250765	0.330526	0.758684	0.448042	0.619318				AC073082.1	0.333399	-0.0700605	0.375874	-0.186394	0.852136	0.916699
AC073508.2	0.659302	-0.252595	0.239097	-1.05645	0.290761	0.459972				AC073508.2	0.659302	-0.473401	0.271797	-1.74174	0.0815537	0.161019
AC073610.2	0.0115165	-0.0258911	2.97777	-0.00869479	0.993063	NA				AC073610.2	0.0115165	0.269637	3.3264	0.0810598	0.935394	NA
AC073610.3	7.34223	0.36967	0.163167	2.26559	0.0234763	0.0724722				AC073610.3	7.34223	0.151558	0.182631	0.829859	0.406618	0.551524
AC073612.1	0	NA	NA	NA	NA	NA				AC073612.1	0	NA	NA	NA	NA	NA
AC073896.1	1.33795	-0.396774	0.229063	-1.73216	0.0832452	0.187255				AC073896.1	1.33795	-0.463494	0.258888	-1.79032	0.0734019	0.148128
AC074143.1	0.0661229	0.0136347	1.11978	0.0121763	0.990285	0.995142				AC074143.1	0.0661229	0.270547	1.25008	0.216423	0.828658	0.901513
AC078927.1	0.633896	-0.0916897	0.277115	-0.330872	0.740741	0.852773				AC078927.1	0.633896	0.16729	0.3109	0.538081	0.590521	0.721241
AC079447.1	21.3702	0.297164	0.0753502	3.94377	8.02e-05	0.000877757				AC079447.1	21.3702	0.082101	0.0861514	0.952984	0.340598	0.484671
AC079594.2	1.92114	0.235033	0.246114	0.954973	0.339591	0.511782				AC079594.2	1.92114	-0.938918	0.272031	-3.45151	0.000557456	0.00265441
AC083800.1	0	NA	NA	NA	NA	NA				AC083800.1	0	NA	NA	NA	NA	NA
AC083902.2	10.8689	-0.0199881	0.320367	-0.0623913	0.950251	0.978308				AC083902.2	9.38576	-0.0743702	0.347534	-0.213994	0.830552	0.902666
AC087289.3	14.461	0.479878	0.130932	3.66509	0.000247256	0.00212451				AC087289.3	14.461	-0.174788	0.148895	-1.1739	0.240436	0.372863
AC087632.1	4.38213	0.189219	0.119757	1.58002	0.114101	0.236421				AC087632.1	4.38213	0.0310139	0.133757	0.231867	0.816641	0.894497
AC090004.1	18.3469	-0.148153	0.11058	-1.33978	0.180316	0.328531				AC090004.1	18.3469	-0.0344462	0.123798	-0.278245	0.780825	0.869817
AC090227.1	0.342785	-0.0592838	0.33511	-0.176909	0.85958	0.927867				AC090227.1	0.342785	-0.376309	0.36977	-1.01768	0.308828	0.450734
AC090360.1	32.0757	0.296073	0.144656	2.04674	0.0406832	0.109485				AC090360.1	32.0757	-0.360103	0.162466	-2.21649	0.026658	0.0655433
AC090527.2	0.631647	-0.236579	0.240715	-0.982819	0.325697	0.496535				AC090527.2	0.631647	-0.0524077	0.274277	-0.191076	0.848466	0.914527
AC091167.3	13.8808	-0.0538214	0.123521	-0.435725	0.663036	0.79783				AC091167.3	13.8808	0.179082	0.137792	1.29965	0.193721	0.316816
AC091167.7	2.86657	0.00725481	0.245997	0.0294915	0.976473	0.989778				AC091167.7	2.86657	-0.599419	0.272554	-2.19927	0.0278591	0.0679176
AC091551.1	1.14179	0.195005	0.226752	0.85999	0.389795	0.564296				AC091551.1	1.14179	-0.450018	0.254518	-1.76812	0.077041	0.153841
AC091959.3	2.71068	-0.369014	0.159345	-2.31582	0.0205681	0.0657009				AC091959.3	2.71068	-0.232343	0.179697	-1.29297	0.196023	0.319461
AC091980.2	4.07063	0.0800629	0.280997	0.284925	0.775702	0.875997				AC091980.2	4.07063	0.143152	0.314579	0.455059	0.649067	0.769065
AC092042.3	5.95739	-0.190833	0.276779	-0.689479	0.490522	0.657952				AC092042.3	5.95739	0.056855	0.309645	0.183613	0.854317	0.918244
AC092073.1	1.04077	-0.0403183	0.220142	-0.183147	0.854683	0.924903				AC092073.1	1.04077	0.0744136	0.24676	0.301562	0.762986	0.856915
AC092143.1	0.538018	-0.461138	0.378903	-1.21703	0.223591	0.382276				AC092143.1	0.538018	0.812292	0.421886	1.92538	0.0541815	0.116335
AC092587.1	5.58278	0.166996	0.127248	1.31237	0.189394	0.340176				AC092587.1	5.58278	0.368147	0.141487	2.602	0.00926829	0.0278471
AC092647.5	2.50052	0.0613111	0.182126	0.336641	0.736388	0.850127				AC092647.5	2.50052	-0.585657	0.201428	-2.90753	0.00364295	0.0128096
AC092718.3	11.6938	-0.0450139	0.113441	-0.396804	0.691512	0.818647				AC092718.3	11.6938	-0.200569	0.126808	-1.58167	0.113724	0.209217
AC092821.1	95.9841	0.563739	0.118757	4.74701	2.06e-06	4.9e-05				AC092821.1	95.9841	-0.151153	0.137262	-1.1012	0.270808	0.40824
AC092835.1	23.7825	-0.494077	0.134192	-3.68188	0.000231523	0.00201376				AC092835.1	23.7825	-0.288969	0.152224	-1.89832	0.0576539	0.122158
AC093155.3	1.05201	0.365776	0.259035	1.41208	0.157928	0.298907				AC093155.3	1.05201	0.455913	0.291796	1.56244	0.118185	0.215522
AC093227.3	0.493616	0.213644	0.291656	0.732518	0.463852	0.633423				AC093227.3	0.493616	-0.0457909	0.322356	-0.142051	0.88704	0.937789
AC093423.3	0.0883242	-0.283111	0.826889	-0.342381	0.732064	0.847397				AC093423.3	0.0883242	0.271757	0.923192	0.294366	0.768478	0.861182
AC093525.1	0.467891	-0.0813149	0.289539	-0.280843	0.778831	0.87793				AC093525.1	0.467891	-0.0461974	0.323985	-0.142591	0.886613	0.937601
AC093525.2	1.47188	-0.0339881	0.214458	-0.158484	0.874076	0.937115				AC093525.2	1.47188	0.317419	0.239847	1.32343	0.185694	0.306783
AC093668.1	0.155784	0.0081694	0.544377	0.0150069	0.988027	0.99432				AC093668.1	0.155784	0.0918091	0.607799	0.151052	0.879935	0.933698
AC093893.1	1.7832	-1.32117	0.487159	-2.712	0.00668791	0.0276692				AC093893.1	1.51097	-0.065839	0.547774	-0.120194	0.90433	0.945878
AC093899.2	0.0194696	-0.0851797	2.97777	-0.0286052	0.977179	NA				AC093899.2	0.0194696	0.170992	3.3264	0.0514045	0.959003	NA
AC096887.1	15.5692	0.134238	0.0881784	1.52234	0.127924	0.256874				AC096887.1	15.5692	0.250942	0.0980861	2.55838	0.0105161	0.0308116
AC097372.1	2.28392	-0.222094	0.279867	-0.793571	0.427445	0.600037				AC097372.1	2.28392	0.223096	0.31417	0.710113	0.477634	0.6211
AC097637.1	0.253796	-0.226122	0.375813	-0.601688	0.547382	0.705511				AC097637.1	0.253796	0.220771	0.420205	0.52539	0.599312	0.728256
AC098850.4	8.35413	-0.622484	0.36553	-1.70296	0.0885748	0.196128				AC098850.4	8.35413	-0.938423	0.409424	-2.29206	0.0219022	0.0559121
AC099329.3	1.93372	0.161646	0.193189	0.836727	0.402746	0.577059				AC099329.3	1.93372	-0.0603858	0.218619	-0.276214	0.782383	0.870995
AC099489.1	105.129	-0.0903382	0.13267	-0.680924	0.495919	0.66208				AC099489.1	105.129	-0.301722	0.148111	-2.03714	0.0416363	0.0941555
AC099518.3	0.977746	-0.252144	0.227319	-1.10921	0.267339	0.434539				AC099518.3	0.977746	-0.356178	0.255704	-1.39293	0.163641	0.277939
AC099811.2	0.276811	0.101051	0.325984	0.309987	0.756571	0.863581				AC099811.2	0.276811	-0.42261	0.363874	-1.16142	0.245471	0.378736
AC099850.2	0.013233	-0.0456539	2.97777	-0.0153316	0.987768	NA				AC099850.2	0.013233	0.269637	3.3264	0.0810598	0.935394	NA
AC100868.1	0.122981	-0.045135	1.11707	-0.0404048	0.96777	0.986526				AC100868.1	0.122981	0.295411	1.24791	0.236725	0.81287	0.892104
AC104109.3	1.89676	-0.117867	0.173069	-0.681037	0.495848	0.662031				AC104109.3	1.89676	0.0805719	0.194108	0.415089	0.678077	0.791335
AC104151.1	0.00996362	-0.0654168	2.97777	-0.0219684	0.982473	NA				AC104151.1	0.00996362	0.244976	3.3264	0.0736459	0.941292	NA
AC104532.1	1.6412	0.115381	0.196309	0.58775	0.5567	0.713433				AC104532.1	1.6412	-0.0292759	0.219235	-0.133537	0.893769	0.941439
AC104581.1	595.262	0.247034	0.0854834	2.88984	0.00385432	0.0180296				AC104581.1	595.262	-0.209681	0.0959397	-2.18555	0.0288488	0.0698848
AC104581.3	0.0535242	-0.104943	1.36693	-0.0767729	0.938804	0.972478				AC104581.3	0.0535242	0.0476855	1.52584	0.0312519	0.975069	0.985632
AC104662.2	0.265277	-0.284537	0.396623	-0.717399	0.473128	0.641696				AC104662.2	0.265277	-0.263396	0.442084	-0.595805	0.551305	0.68798
AC104831.1	1.53864	1.13449	0.481435	2.35648	0.0184489	0.0604778				AC104831.1	1.53864	-1.32607	0.533045	-2.48772	0.0128566	0.0361514
AC105001.2	0.307326	-0.356433	0.375679	-0.94877	0.342738	0.515009				AC105001.2	0.307326	-0.369249	0.419561	-0.880084	0.378814	0.523581
AC105052.1	0.280671	-0.272424	0.392765	-0.693606	0.487929	0.6557				AC105052.1	0.280671	-0.178843	0.43715	-0.409112	0.682458	0.794594
AC106782.1	10.6736	-0.259527	0.18127	-1.43172	0.152225	0.29117				AC106782.1	10.6736	-0.0781108	0.203261	-0.384288	0.700765	0.809474
AC107871.1	2.52775	0.273898	0.216801	1.26336	0.206461	0.361077				AC107871.1	2.52775	-0.342681	0.244822	-1.39972	0.161598	0.275331
AC108488.2	0.00298203	-0.0654168	2.97777	-0.0219684	0.982473	NA				AC108488.2	0.00298203	0.195653	3.3264	0.0588183	0.953097	NA
AC110275.1	0.0645281	-0.104943	1.12173	-0.0935543	0.925463	0.965354				AC110275.1	0.0645281	0.246293	1.25226	0.196679	0.844079	0.91163
AC110611.1	0.304722	0.0307358	0.483374	0.063586	0.9493	0.978104				AC110611.1	0.304722	0.204143	0.539631	0.3783	0.705208	0.812864
AC110814.1	899.606	-0.403874	0.239576	-1.68578	0.0918373	0.201462				AC110814.1	899.606	-0.329461	0.268082	-1.22896	0.219087	0.34794
AC112229.3	22.5213	-0.747991	0.203757	-3.67099	0.000241613	0.00208729				AC112229.3	22.5213	-1.15075	0.22146	-5.1962	2.03e-07	3.22e-06
AC112484.1	37.1065	0.173167	0.158515	1.09243	0.274644	0.442495				AC112484.1	37.1065	-0.426213	0.174269	-2.44572	0.0144564	0.0397379
AC113404.3	16.3938	-0.350289	0.128406	-2.72798	0.00637237	0.0266813				AC113404.3	16.3938	-0.121058	0.14438	-0.838469	0.401768	0.546923
AC113554.2	0.231616	-0.0906551	0.472753	-0.19176	0.84793	0.921341				AC113554.2	0.231616	0.0972365	0.527618	0.184293	0.853783	0.917775
AC114296.1	5.98174	0.135673	0.263863	0.514181	0.607126	0.754947				AC114296.1	5.98174	0.340008	0.292946	1.16065	0.245784	0.379066
AC114490.2	9.72729	0.115986	0.105314	1.10133	0.270751	0.438652				AC114490.2	9.72729	-0.141499	0.118614	-1.19293	0.232896	0.364422
AC114783.1	0.0252106	-0.00612823	2.56067	-0.00239321	0.99809	NA				AC114783.1	0.0252106	0.244976	2.85669	0.0857554	0.931661	NA
AC115220.1	0.135491	-0.623881	1.61427	-0.386479	0.699142	0.823507				AC115220.1	0.0670701	0.22083	1.93091	0.114366	0.908948	0.947837
AC117457.1	0.0686776	-0.164232	1.52512	-0.107685	0.914246	0.959201				AC117457.1	0.0686776	-0.0255789	1.70241	-0.0150251	0.988012	0.993469
AC119396.1	10.3777	0.151759	0.156794	0.967885	0.333102	0.504775				AC119396.1	10.3777	0.20947	0.179303	1.16824	0.242708	0.375352
AC120057.3	0.0337207	-0.144469	2.07545	-0.0696084	0.944505	NA				AC120057.3	0.0337207	0.342947	2.31595	0.14808	0.882279	NA
AC120114.5	3.9465	-0.167182	0.12628	-1.3239	0.185535	0.335356				AC120114.5	3.9465	-0.445511	0.14106	-3.15831	0.00158689	0.00639371
AC124312.1	0.0370429	-0.0258911	2.25231	-0.0114954	0.990828	NA				AC124312.1	0.0370429	0.245285	2.5128	0.0976144	0.922239	NA
AC126755.2	3.78944	0.373321	0.141735	2.63395	0.0084399	0.0331526				AC126755.2	3.78944	-0.241098	0.161052	-1.49701	0.134389	0.238313
AC129492.3	0.00649141	-0.0456539	2.97777	-0.0153316	0.987768	NA				AC129492.3	0.00649141	0.220314	3.3264	0.0662321	0.947193	NA
AC130366.1	0	NA	NA	NA	NA	NA				AC130366.1	0	NA	NA	NA	NA	NA
AC131097.2	24.8883	0.340389	0.22318	1.52518	0.127215	0.255942				AC131097.2	24.8883	0.209428	0.250044	0.837565	0.402275	0.547363
AC133555.3	0.165637	-0.0407977	0.691694	-0.0589822	0.952966	0.97919				AC133555.3	0.165637	0.216461	0.772287	0.280285	0.779259	0.868782
AC133555.5	257.574	-0.0852894	0.0884881	-0.963852	0.33512	0.506749				AC133555.5	257.574	-0.158995	0.0987712	-1.60973	0.107456	0.199995
AC134025.1	0.0292009	-0.0258911	2.53024	-0.0102327	0.991836	NA				AC134025.1	0.0292009	0.146331	2.82287	0.0518376	0.958658	NA
AC134669.2	1.01137	0.351332	0.228211	1.53951	0.12368	0.250744				AC134669.2	1.01137	0.316969	0.257842	1.22932	0.218953	0.347756
AC135050.2	6.16211	-0.205004	0.138517	-1.48	0.138874	0.272642				AC135050.2	6.16211	0.262312	0.153783	1.70573	0.0880583	0.170948
AC135068.1	0.00660597	-0.00612823	2.97777	-0.00205799	0.998358	NA				AC135068.1	0.00660597	0.269637	3.3264	0.0810598	0.935394	NA
AC135068.3	0	NA	NA	NA	NA	NA				AC135068.3	0	NA	NA	NA	NA	NA
AC135178.2	3.35878	-0.0672573	0.174155	-0.386191	0.699355	0.823533				AC135178.2	3.35878	-0.424842	0.19381	-2.19205	0.0283757	0.0689924
AC135586.2	2.39168	0.56591	0.17133	3.30304	0.00095644	0.00615043				AC135586.2	2.39168	-0.128387	0.193144	-0.664721	0.506229	0.648057
AC136428.1	10.5802	0.639462	0.293092	2.18178	0.0291259	0.0853616				AC136428.1	10.5802	0.934006	0.325193	2.87216	0.00407671	0.0140633
AC137834.1	4.13563	0.0934717	0.173753	0.537957	0.590607	0.741624				AC137834.1	4.13563	-0.0934294	0.194647	-0.479994	0.631232	0.754196
AC138647.1	0.048069	-0.124706	2.43381	-0.0512388	0.959135	0.982571				AC138647.1	0.048069	0.121669	2.71572	0.0448019	0.964265	0.981202
AC138696.1	1.74169	-0.12473	0.193854	-0.643423	0.519949	0.682157				AC138696.1	1.74169	0.0021092	0.219034	0.00962956	0.992317	0.995937
AC138811.2	8.97478	0.302319	0.139726	2.16366	0.0304901	0.0881993				AC138811.2	8.97478	0.0548004	0.158103	0.346611	0.728884	0.83132
AC138894.1	1.53964	0.013232	0.211734	0.0624933	0.95017	0.978308				AC138894.1	1.53964	0.347504	0.23882	1.45509	0.145645	0.253753
AC138969.1	23.7822	0.0337634	0.114049	0.296042	0.767198	0.869792				AC138969.1	23.7822	0.133991	0.127205	1.05334	0.292184	0.432384
AC139530.2	0.920953	0.476996	0.24022	1.98566	0.0470712	0.121856				AC139530.2	0.920953	0.583362	0.263506	2.21385	0.0268391	0.0658932
AC140504.1	0.0081753	-0.104943	2.97777	-0.035242	0.971887	NA				AC140504.1	0.0081753	0.195653	3.3264	0.0588183	0.953097	NA
AC142391.1	0.170678	-0.184561	0.618403	-0.298448	0.765361	0.868767				AC142391.1	0.170678	0.645437	0.690009	0.935404	0.34958	0.494105
AC187653.1	0.212965	0.014522	0.954658	0.0152117	0.987863	0.99432				AC187653.1	0.212965	0.0985011	1.06265	0.0926943	0.926146	0.957499
AC233723.1	21.4363	0.0232982	0.153799	0.151484	0.879594	0.940496				AC233723.1	21.4363	0.7504	0.168908	4.44266	8.89e-06	8.16e-05
AC233724.12	0.116314	-0.48344	1.5143	-0.31925	0.749537	0.858886				AC233724.12	0.217345	1.01537	1.64104	0.618734	0.536091	0.675025
AC233724.6	0.180416	0.0743905	0.837575	0.0888164	0.929228	0.967153				AC233724.6	0.544404	1.84569	1.05516	1.7492	0.0802556	0.158849
AC233992.2	5.14879	-0.165421	0.159375	-1.03794	0.2993	0.468903				AC233992.2	5.14879	0.266239	0.17793	1.49632	0.134572	0.23857
AC234771.5	0.250782	0.00808445	0.352765	0.0229174	0.981716	0.992095				AC234771.5	0.250782	0.0875238	0.39407	0.222102	0.824235	0.898798
AC239799.1	0.157419	0.153865	0.586101	0.262523	0.792918	0.887218				AC239799.1	0.157419	-0.146569	0.65443	-0.223964	0.822785	0.897887
AC243547.3	0.271033	0.462323	0.420589	1.09923	0.271668	0.439515				AC243547.3	0.271033	-0.279134	0.467045	-0.59766	0.550067	0.687243
AC243756.1	0.804128	0.376471	0.251949	1.49423	0.135114	0.267182				AC243756.1	0.804128	0.798198	0.282149	2.82899	0.0046695	0.0158199
AC243967.1	1.02697	-0.180155	0.467183	-0.385619	0.699779	0.823634				AC243967.1	1.02697	-2.02739	0.506759	-4.0007	6.32e-05	0.000425138
AC244197.3	74.5536	0.143618	0.147031	0.976782	0.328677	0.499892				AC244197.3	74.5536	-0.762233	0.160144	-4.75967	1.94e-06	2.21e-05
AC244517.10	0.450462	-0.654622	0.392925	-1.66602	0.0957086	0.207667				AC244517.10	0.450462	0.101489	0.445795	0.227658	0.819912	0.89637
AC244517.6	1.55536	-0.0148823	0.31342	-0.0474834	0.962128	0.983845				AC244517.6	1.55536	-0.954977	0.346496	-2.7561	0.00584949	0.0190577
AC245033.1	0.369946	-0.0597817	0.326701	-0.182986	0.854809	0.924903				AC245033.1	0.369946	0.0357078	0.365634	0.0976599	0.922202	0.95497
AC245041.1	3.38041	-0.418958	0.268347	-1.56126	0.118463	0.243159				AC245041.1	3.38041	0.215935	0.300408	0.718806	0.472261	0.616082
AC245748.1	0.00469346	-0.0654168	2.97777	-0.0219684	0.982473	NA				AC245748.1	0.00469346	0.195653	3.3264	0.0588183	0.953097	NA
ACAA1	1926.57	-0.24815	0.0681748	-3.6399	0.00027274	0.00229205				ACAA1	1926.57	0.266968	0.0765439	3.48778	0.000487048	0.00237596
ACAA2	1422.15	-0.120785	0.14746	-0.819105	0.412726	0.586495				ACAA2	1422.15	-0.0578279	0.164716	-0.351075	0.725532	0.828597
ACACA	4993.45	-0.28211	0.063549	-4.43925	9.03e-06	0.000156897				ACACA	4993.45	-0.128777	0.0730251	-1.76346	0.0778223	0.155109
ACACB	814.983	0.197565	0.107163	1.8436	0.065242	0.155737				ACACB	814.983	-0.464278	0.122035	-3.80447	0.00014211	0.000844794
ACAD10	1348.94	0.0969661	0.0586787	1.65249	0.098434	0.212232				ACAD10	1348.94	-0.0219464	0.0658226	-0.333418	0.738819	0.83906
ACAD11	31.922	0.0197528	0.105561	0.187123	0.851564	0.923019				ACAD11	31.922	-0.207024	0.117222	-1.76609	0.0773816	0.154424
ACAD8	1122.21	0.0524467	0.074646	0.702605	0.482302	0.650762				ACAD8	1122.21	-0.128567	0.0832075	-1.54514	0.122312	0.221414
ACAD9	4202.05	0.210888	0.059696	3.53269	0.000411354	0.00318177				ACAD9	4202.05	0.144384	0.0671291	2.15084	0.0314887	0.0750906
ACADL	85.7939	0.258265	0.29333	0.88046	0.37861	0.55195				ACADL	85.7939	-0.921555	0.325019	-2.83539	0.00457699	0.0155616
ACADM	2455.3	0.0546234	0.0839823	0.650416	0.515424	0.678501				ACADM	2455.3	-0.206775	0.0932957	-2.21634	0.0266682	0.0655493
ACADS	1407.05	0.335656	0.0809417	4.14688	3.37e-05	0.000449024				ACADS	1407.05	0.137265	0.0923225	1.4868	0.137067	0.242119
ACADSB	744.512	-0.175466	0.0992544	-1.76784	0.077088	0.176647				ACADSB	744.512	-0.249249	0.113493	-2.19616	0.0280806	0.0683704
ACADVL	15213.4	0.124297	0.0772562	1.6089	0.107639	0.226626				ACADVL	15213.4	0.101436	0.086535	1.1722	0.241119	0.373642
ACAN	124.521	-0.805121	0.177483	-4.53632	5.72e-06	0.000108897				ACAN	124.521	0.277518	0.202719	1.36898	0.171006	0.287714
ACAP1	899.093	0.824854	0.119066	6.92771	4.28e-12	1.46e-09				ACAP1	899.093	1.26492	0.124694	10.1442	3.52e-24	8.62e-21
ACAP2	4265.8	-0.0587567	0.0838426	-0.700798	0.483429	0.651817				ACAP2	4265.8	-0.310697	0.0920092	-3.37681	0.000733318	0.00336039
ACAP3	3602.69	-0.0256327	0.0861391	-0.297573	0.766029	0.869047				ACAP3	3602.69	0.0772378	0.0956126	0.80782	0.419194	0.564576
ACAT1	1511.86	0.105805	0.0904077	1.17031	0.241877	0.40478				ACAT1	1511.86	0.0876158	0.101583	0.862506	0.388409	0.533219
ACAT2	2560.49	0.100983	0.101078	0.999058	0.317766	0.488349				ACAT2	2560.49	-0.250539	0.112431	-2.22838	0.0258554	0.0639263
ACBD3	3931.33	-0.17943	0.0570967	-3.14257	0.00167471	0.00946412				ACBD3	3931.33	-0.198443	0.0637213	-3.11423	0.00184428	0.00726837
ACBD4	566.08	0.29228	0.101414	2.88204	0.0039511	0.0183549				ACBD4	566.08	-0.088117	0.115114	-0.765473	0.44399	0.588845
ACBD5	1752.96	-0.165818	0.0722592	-2.29477	0.0217465	0.0684587				ACBD5	1752.96	-0.38902	0.0784844	-4.95666	7.17e-07	9.48e-06
ACBD6	2552.83	0.170484	0.0547333	3.11481	0.00184064	0.0101939				ACBD6	2552.83	0.154524	0.0620116	2.49186	0.0127077	0.0358221
ACBD7	78.8253	0.413128	0.194161	2.12776	0.0333568	0.0942391				ACBD7	78.8253	-1.27811	0.209148	-6.11103	9.9e-10	2.89e-08
ACCS	605.474	0.261013	0.102801	2.53902	0.0111163	0.0410668				ACCS	605.474	-0.228495	0.114861	-1.98931	0.0466665	0.103046
ACCSL	0.188957	-0.0260244	0.566891	-0.0459073	0.963384	0.984595				ACCSL	0.188957	-0.123796	0.633371	-0.195456	0.845036	0.912322
ACD	1553.01	0.218121	0.0659773	3.306	0.000946389	0.00610773				ACD	1553.01	0.298773	0.0731205	4.08603	4.39e-05	0.000313733
ACE	737.608	0.171991	0.134989	1.27412	0.202622	0.356661				ACE	737.608	-0.170705	0.150334	-1.1355	0.256164	0.391102
ACE2	297.186	0.387669	0.178332	2.17387	0.029715	0.0866623				ACE2	297.186	-0.139695	0.199569	-0.699984	0.483938	0.627036
ACER1	5.44286	-0.130438	0.255447	-0.510625	0.609614	0.757002				ACER1	5.65418	0.371563	0.28803	1.29001	0.197046	0.32077
ACER2	120.928	-0.270243	0.136507	-1.9797	0.047737	0.123061				ACER2	120.928	-0.00144104	0.154348	-0.00933631	0.992551	0.995937
ACER3	1483.1	-0.157537	0.081838	-1.92498	0.0542312	0.135579				ACER3	1483.1	0.0397629	0.0928269	0.428355	0.668392	0.783987
ACHE	203.102	0.0657525	0.206722	0.318072	0.75043	0.859446				ACHE	249.316	0.539955	0.246752	2.18826	0.028651	0.0695026
ACIN1	10632.8	-0.0213031	0.0395616	-0.53848	0.590245	0.741365				ACIN1	10632.8	0.0351756	0.0442161	0.795538	0.426301	0.57153
ACKR1	754.526	0.206589	0.242242	0.852823	0.393758	0.568097				ACKR1	503.617	0.436632	0.263608	1.65636	0.0976481	0.185395
ACKR2	336.353	-0.718714	0.244384	-2.94093	0.00327232	0.0159025				ACKR2	336.353	0.0117183	0.275446	0.042543	0.966066	0.982354
ACKR3	3932.19	-0.15772	0.195951	-0.804894	0.420881	0.594006				ACKR3	3932.19	-0.431771	0.218068	-1.97998	0.0477054	0.10494
ACKR4	92.4917	0.247587	0.213431	1.16003	0.246036	0.409767				ACKR4	92.4917	0.23802	0.238521	0.997901	0.318327	0.460939
ACLY	7718.46	-0.328911	0.0723224	-4.54784	5.42e-06	0.000104771				ACLY	7718.46	-0.0744896	0.0827895	-0.899747	0.368255	0.513366
ACMSD	5.43933	0.390758	0.190501	2.05122	0.040246	0.108698				ACMSD	4.76346	0.0275758	0.198927	0.138622	0.889749	0.939168
ACO1	2145.27	-0.26686	0.069869	-3.81944	0.000133757	0.00131339				ACO1	2145.27	0.00285062	0.0796534	0.0357879	0.971452	0.984199
ACO2	4111.96	0.00108131	0.0747593	0.0144639	0.98846	0.994442				ACO2	4111.96	-0.198982	0.0827899	-2.40345	0.0162411	0.0437443
ACOD1	4.62643	0.282431	0.269072	1.04965	0.29388	0.463716				ACOD1	4.62643	2.06839	0.283548	7.29466	2.99e-13	1.86e-11
ACOT1	116.312	0.23131	0.118941	1.94475	0.0518052	0.130985				ACOT1	116.312	-0.13418	0.131937	-1.017	0.309155	0.451075
ACOT11	701.999	-0.243658	0.120766	-2.0176	0.0436328	0.115424				ACOT11	701.999	-0.0716766	0.135766	-0.527943	0.597539	0.726988
ACOT12	1.33504	-0.0500626	0.325884	-0.153621	0.877909	0.939654				ACOT12	1.33504	0.263858	0.365465	0.72198	0.470307	0.61433
ACOT13	1369.8	-0.0284972	0.0773406	-0.368463	0.712528	0.832647				ACOT13	1369.8	0.135756	0.0861497	1.57581	0.115069	0.211141
ACOT2	608.165	0.216759	0.0987929	2.19408	0.0282297	0.0833894				ACOT2	608.165	-0.21724	0.109369	-1.9863	0.0470006	0.103641
ACOT4	346.738	0.202955	0.115215	1.76154	0.0781467	0.178624				ACOT4	346.738	-0.0925737	0.128917	-0.718088	0.472703	0.616516
ACOT6	0.945259	0.0975571	0.259189	0.376394	0.706624	0.828026				ACOT6	0.945259	-0.107421	0.289396	-0.37119	0.710496	0.816841
ACOT7	3510.97	0.0987753	0.0939029	1.05189	0.292851	0.462285				ACOT7	3510.97	0.293253	0.103778	2.82577	0.00471669	0.0159528
ACOT8	1424.35	0.268306	0.0829978	3.23269	0.00122632	0.00745697				ACOT8	1424.35	0.398864	0.0917449	4.34753	1.38e-05	0.000116983
ACOT9	2545.1	-0.101922	0.0839972	-1.2134	0.224979	0.383903				ACOT9	2545.1	0.290201	0.0928354	3.12597	0.00177217	0.00702765
ACOX1	3500.1	-0.148256	0.0723157	-2.05012	0.0403524	0.10884				ACOX1	3500.1	-0.178203	0.0805376	-2.21267	0.0269202	0.0660497
ACOX2	87.4117	-1.05018	0.192077	-5.4675	4.56e-08	2.3e-06				ACOX2	87.4117	0.00795826	0.224803	0.0354011	0.97176	0.984218
ACOX3	1135.79	0.113171	0.0819002	1.38181	0.167029	0.311144				ACOX3	1135.79	0.259068	0.0908602	2.85128	0.00435441	0.0148922
ACOXL	42.2958	0.330965	0.153478	2.15643	0.0310505	0.0893376				ACOXL	42.2958	0.058042	0.173996	0.333582	0.738695	0.838986
ACP1	4916.44	0.0728183	0.0564586	1.28976	0.197133	0.349511				ACP1	4916.44	-0.0468467	0.0631743	-0.741547	0.458362	0.603289
ACP2	2660.04	0.153974	0.0642536	2.39635	0.0165594	0.0557169				ACP2	2660.04	0.270307	0.0711074	3.80139	0.000143889	0.000854043
ACP5	3287.85	0.537121	0.131588	4.08183	4.47e-05	0.000553618				ACP5	3287.85	1.175	0.136606	8.60139	7.88e-18	1.71e-15
ACP6	1043.53	0.0200528	0.100799	0.198939	0.842311	0.917592				ACP6	1043.53	-0.0925266	0.112525	-0.822276	0.41092	0.556135
ACP7	134.447	-0.560304	0.274342	-2.04235	0.0411164	0.110433				ACP7	123.685	0.332442	0.301699	1.1019	0.270505	0.407848
ACPP	683.042	0.094069	0.160144	0.587401	0.556935	0.713542				ACPP	683.042	0.0666605	0.179342	0.371695	0.71012	0.816669
ACPT	11.0776	0.245033	0.143407	1.70866	0.0875135	0.194522				ACPT	11.0776	0.11238	0.160866	0.698592	0.484807	0.627753
ACR	5.76293	-0.617721	0.166203	-3.71666	0.000201871	0.00181097				ACR	5.76293	-0.213154	0.192353	-1.10814	0.267802	0.40473
ACRBP	91.76	0.155156	0.115606	1.34211	0.179559	0.327527				ACRBP	91.76	-0.130731	0.129481	-1.00965	0.312663	0.454942
ACRV1	38.4327	0.361713	0.0951557	3.80127	0.000143956	0.00139068				ACRV1	38.4327	0.12913	0.108184	1.19362	0.232627	0.36415
ACSBG1	36.1963	0.207564	0.153789	1.34966	0.177124	0.324594				ACSBG1	36.1963	-0.242186	0.171073	-1.41569	0.156867	0.269233
ACSBG2	9.13887	0.189025	0.123093	1.53563	0.124629	0.252213				ACSBG2	9.13887	-0.29113	0.137243	-2.12127	0.033899	0.0797541
ACSF2	2522.43	0.0580813	0.141956	0.40915	0.68243	0.812169				ACSF2	2522.43	0.28465	0.157742	1.80453	0.0711488	0.144674
ACSF3	1603.06	0.196642	0.0634479	3.09927	0.00193998	0.0105937				ACSF3	1603.06	0.180358	0.0711006	2.53665	0.0111918	0.032316
ACSL1	3488.86	-0.224558	0.116324	-1.93045	0.0535508	0.134443				ACSL1	3488.86	-0.0534228	0.130299	-0.410002	0.681804	0.794085
ACSL3	4911.76	-0.299297	0.0729217	-4.10436	4.05e-05	0.000512974				ACSL3	4911.76	-0.073015	0.0836233	-0.873142	0.382586	0.527324
ACSL4	2652.6	-0.230531	0.115639	-1.99354	0.0462028	0.120471				ACSL4	2652.6	0.0594567	0.129379	0.459554	0.645836	0.766424
ACSL5	2698.97	-0.0687801	0.157469	-0.436786	0.662267	0.797256				ACSL5	2698.97	-0.254866	0.175554	-1.45178	0.146562	0.254934
ACSL6	60.3845	-0.389358	0.221564	-1.75732	0.0788637	0.179704				ACSL6	56.4416	0.85364	0.238222	3.58337	0.000339185	0.0017559
ACSM1	27.6729	0.0592749	0.150749	0.393203	0.69417	0.820269				ACSM1	27.6729	-0.0368293	0.172306	-0.213744	0.830747	0.902695
ACSM2A	1.87318	0.657068	0.392402	1.67448	0.0940369	0.204994				ACSM2A	1.87318	0.852118	0.437595	1.94728	0.0515017	0.111748
ACSM2B	1.77006	0.42002	0.40365	1.04056	0.298082	0.46782				ACSM2B	1.77006	1.18777	0.444979	2.66927	0.00760155	0.0236035
ACSM3	267.726	0.213825	0.209294	1.02165	0.306948	0.477054				ACSM3	267.726	-0.836403	0.229433	-3.64552	0.000266851	0.00143466
ACSM4	2.5224	-0.377283	0.255873	-1.47449	0.140349	0.274833				ACSM4	2.5224	0.626283	0.284829	2.1988	0.0278918	0.0679801
ACSM5	16.4725	0.48771	0.18357	2.65681	0.00788834	0.0314634				ACSM5	16.4725	0.808923	0.203996	3.96538	7.33e-05	0.000482258
ACSM6	0.834476	0.253948	0.272768	0.931001	0.351853	0.524788				ACSM6	0.834476	0.490369	0.285413	1.7181	0.085778	0.167559
ACSS1	2077.06	0.440883	0.144045	3.06072	0.00220804	0.0116999				ACSS1	2077.06	-0.23333	0.162951	-1.4319	0.152172	0.262709
ACSS2	2856.26	-0.0442784	0.0767989	-0.57655	0.564243	0.720018				ACSS2	2856.26	-0.0664938	0.0861162	-0.772141	0.440031	0.585137
ACSS3	118.111	-0.575348	0.208282	-2.76235	0.00573875	0.024506				ACSS3	118.111	-0.513032	0.232582	-2.20581	0.0273971	0.0669535
ACTA1	24.9287	-0.00624545	0.12802	-0.0487849	0.961091	0.983616				ACTA1	24.9287	0.365741	0.140711	2.59924	0.00934312	0.0280204
ACTA2	8855.16	-0.830872	0.178381	-4.65785	3.2e-06	6.91e-05				ACTA2	5820.19	0.138771	0.197659	0.702072	0.482634	0.625644
ACTB	306638	-0.148997	0.0635193	-2.3457	0.0189914	0.0618048				ACTB	306638	0.339005	0.0694229	4.88318	1.04e-06	1.3e-05
ACTBL2	20.4266	-0.391352	0.282288	-1.38636	0.165637	0.309274				ACTBL2	20.4266	0.631003	0.314595	2.00576	0.0448818	0.0998778
ACTC1	42.2792	-1.36231	0.242722	-5.61264	1.99e-08	1.22e-06				ACTC1	32.6745	0.239606	0.260934	0.918265	0.35848	0.503151
ACTG1	209267	-0.0962894	0.0631023	-1.52593	0.127028	0.255742				ACTG1	209267	0.213011	0.0697255	3.055	0.00225061	0.00859857
ACTG2	915.457	-1.16697	0.223503	-5.22126	1.78e-07	6.92e-06				ACTG2	735.658	0.0930364	0.23906	0.389176	0.697146	0.806528
ACTL10	205.433	0.317878	0.117551	2.70418	0.00684738	0.0281462				ACTL10	205.433	0.253348	0.131886	1.92096	0.0547362	0.117288
ACTL6A	6304.89	-0.0581433	0.0770711	-0.754411	0.450602	0.621635				ACTL6A	6304.89	-0.335752	0.083916	-4.00105	6.31e-05	0.000424665
ACTL6B	2.55694	0.450318	0.214237	2.10196	0.0355571	0.0990644				ACTL6B	2.55694	0.159602	0.241047	0.662121	0.507894	0.649492
ACTL7A	0.190772	0.520076	0.526203	0.988357	0.322978	0.493853				ACTL7A	0.190772	0.549527	0.586973	0.936205	0.349168	0.493669
ACTL7B	0.822952	0.16902	0.260447	0.64896	0.516365	0.679272				ACTL7B	0.822952	0.479728	0.290929	1.64895	0.0991571	0.187747
ACTL8	80.2501	0.707805	0.373678	1.89416	0.0582044	0.143174				ACTL8	59.9704	-0.830352	0.405543	-2.04751	0.0406082	0.0923015
ACTL9	0.201783	-0.145502	0.601385	-0.241945	0.808823	0.89719				ACTL9	0.201783	0.280734	0.67158	0.418021	0.675932	0.789834
ACTN1	15846	-0.492104	0.103286	-4.76449	1.89e-06	4.56e-05				ACTN1	15846	0.469925	0.116323	4.03984	5.35e-05	0.000369559
ACTN2	12.0294	0.0285969	0.226953	0.126004	0.899729	0.951651				ACTN2	11.3486	0.257321	0.246654	1.04325	0.296834	0.437169
ACTN3	4.6673	0.00500145	0.159473	0.0313623	0.974981	0.989383				ACTN3	4.6673	0.531777	0.176278	3.0167	0.00255547	0.00958137
ACTN4	42775	-0.279113	0.0806647	-3.46016	0.000539848	0.00394225				ACTN4	42775	0.0492303	0.0919124	0.535622	0.59222	0.722588
ACTR10	2973.85	-0.0160668	0.0461952	-0.347801	0.727989	0.844265				ACTR10	2973.85	-0.0321025	0.0515767	-0.622422	0.533664	0.67264
ACTR1A	6678.53	0.0628363	0.0479153	1.3114	0.189722	0.340541				ACTR1A	6678.53	0.267287	0.0514967	5.19038	2.1e-07	3.31e-06
ACTR1B	4087.04	0.113897	0.0457853	2.48763	0.0128598	0.0458341				ACTR1B	4087.04	-0.0846366	0.0514035	-1.64651	0.099658	0.188528
ACTR2	14494.9	-0.274385	0.0531069	-5.16666	2.38e-07	8.71e-06				ACTR2	14494.9	-0.088791	0.0616547	-1.44013	0.14983	0.259578
ACTR3	13751.1	-0.168254	0.0527294	-3.19091	0.00141828	0.00835227				ACTR3	13751.1	0.0244238	0.0598743	0.407918	0.683334	0.795227
ACTR3B	325.473	-0.0656251	0.0924282	-0.710013	0.477696	0.646327				ACTR3B	325.473	-0.16234	0.102926	-1.57725	0.114738	0.210797
ACTR3C	145.83	-0.140913	0.0977554	-1.44148	0.149448	0.28744				ACTR3C	145.83	0.0292522	0.109709	0.266634	0.789751	0.87645
ACTR5	901.104	0.150612	0.0647658	2.32548	0.0200461	0.0643129				ACTR5	901.104	0.173901	0.0716918	2.42567	0.0152801	0.0416369
ACTR6	1528.32	0.26172	0.0591571	4.42416	9.68e-06	0.000166456				ACTR6	1528.32	-0.19655	0.0671347	-2.9277	0.00341475	0.0121369
ACTR8	1015.68	-0.0350028	0.0564267	-0.620323	0.535045	0.694665				ACTR8	1015.68	0.0604711	0.0630974	0.958377	0.337873	0.481761
ACTRT1	0.114743	-0.584186	1.14544	-0.51001	0.610044	0.757228				ACTRT1	0.0658161	0.0730546	1.30984	0.0557736	0.955522	0.975577
ACTRT2	0.0339863	-0.0258911	2.50022	-0.0103555	0.991738	NA				ACTRT2	0.0339863	0.121669	2.78953	0.0436165	0.96521	NA
ACTRT3	180.346	-0.08075	0.0935681	-0.863008	0.388133	0.562359				ACTRT3	180.346	0.169416	0.10418	1.62619	0.103909	0.194663
ACVR1	1856.74	-0.407638	0.0712963	-5.71752	1.08e-08	7.51e-07				ACVR1	1856.74	-0.289588	0.0821072	-3.52695	0.00042038	0.00209894
ACVR1B	3271.41	-0.142243	0.0759399	-1.8731	0.0610548	0.148335				ACVR1B	3271.41	-0.215534	0.0848227	-2.54099	0.0110538	0.0319949
ACVR1C	214.692	-0.440561	0.178365	-2.46999	0.0135115	0.047554				ACVR1C	214.692	-0.327642	0.200835	-1.6314	0.102807	0.193033
ACVR2A	802.528	-0.116642	0.0824389	-1.41489	0.157101	0.297667				ACVR2A	802.528	-0.347717	0.0906941	-3.83395	0.000126101	0.000763394
ACVR2B	606.923	-0.0701486	0.0915018	-0.766636	0.443298	0.61503				ACVR2B	606.923	-0.070089	0.102431	-0.684255	0.493814	0.636383
ACVRL1	701.085	0.0157196	0.117136	0.1342	0.893244	0.947409				ACVRL1	701.085	0.368189	0.134441	2.73866	0.00616909	0.0198821
ACY1	259.463	-0.0698183	0.0965549	-0.723093	0.469622	0.638748				ACY1	259.463	0.212038	0.107508	1.97229	0.0485763	0.106512
ACY3	309.798	0.160712	0.2349	0.684172	0.493867	0.6604				ACY3	333.887	-0.668591	0.265255	-2.52056	0.0117167	0.0335719
ACYP1	794.314	0.255398	0.0733341	3.48266	0.000496457	0.00368521				ACYP1	794.314	-0.0802459	0.0837033	-0.958695	0.337712	0.48164
ACYP2	503.409	0.213264	0.067464	3.16115	0.00157149	0.00900323				ACYP2	503.409	0.102374	0.0762923	1.34186	0.17964	0.298923
AD000671.1	3.42148	0.591337	0.155556	3.80144	0.000143857	0.00139043				AD000671.1	3.42148	0.13193	0.175526	0.751625	0.452277	0.597089
AD000671.2	3.19335	0.266212	0.146635	1.81547	0.0694519	0.163238				AD000671.2	3.19335	-0.0028033	0.162661	-0.017234	0.98625	0.992114
ADA	1241.03	-0.0668175	0.145818	-0.458226	0.64679	0.786198				ADA	1241.03	0.566874	0.160106	3.54062	0.000399195	0.00200943
ADA2	1716.29	0.587026	0.152825	3.84116	0.000122456	0.00122187				ADA2	1716.29	0.988987	0.166295	5.9472	2.73e-09	7.32e-08
ADAD1	0.184225	0.314488	0.547753	0.574143	0.565871	0.721222				ADAD1	0.184225	0.0508332	0.611764	0.0830927	0.933778	0.962007
ADAD2	67.3671	-0.23277	0.204931	-1.13585	0.256021	0.421222				ADAD2	67.3671	-0.249126	0.229396	-1.08601	0.277474	0.416026
ADAL	454.092	0.14596	0.0693479	2.10476	0.0353126	0.0985845				ADAL	454.092	-0.163334	0.0777003	-2.1021	0.0355444	0.0828188
ADAM10	6825.98	-0.171669	0.0703918	-2.43877	0.0147375	0.0508395				ADAM10	6825.98	-0.149774	0.078991	-1.89608	0.0579489	0.122728
ADAM11	91.3118	0.447121	0.157854	2.83249	0.00461868	0.0207635				ADAM11	91.3118	-0.401845	0.177488	-2.26407	0.0235698	0.0592081
ADAM12	916.573	-0.787501	0.176173	-4.47005	7.82e-06	0.000140115				ADAM12	916.573	-0.129577	0.20146	-0.64319	0.520101	0.660332
ADAM15	14075.1	-0.151869	0.0948533	-1.60109	0.109356	0.229008				ADAM15	14075.1	0.252078	0.105481	2.3898	0.0168574	0.0451624
ADAM17	2154.27	-0.451468	0.0986695	-4.57556	4.75e-06	9.43e-05				ADAM17	2154.27	-0.300411	0.112514	-2.67	0.0075852	0.0235642
ADAM18	0.362066	-0.737145	0.694754	-1.06102	0.288683	0.457594				ADAM18	0.362066	-0.0426664	0.782705	-0.0545115	0.956528	0.97629
ADAM19	1371.73	-0.148749	0.12971	-1.14678	0.251472	0.416318				ADAM19	1371.73	0.418013	0.14349	2.91318	0.00357763	0.0126194
ADAM2	0.712012	-2.33845	0.798368	-2.92904	0.0034001	0.0163571				ADAM2	0.712012	-1.18565	0.925106	-1.28164	0.199969	0.324478
ADAM20	4.63147	0.168151	0.124722	1.34821	0.177592	0.325163				ADAM20	4.63147	-0.0686697	0.140833	-0.487598	0.625835	0.749616
ADAM21	10.7948	-0.462214	0.177705	-2.60102	0.00929475	0.035718				ADAM21	10.7948	0.00298276	0.20042	0.0148826	0.988126	0.993478
ADAM22	304.551	0.270023	0.171064	1.57849	0.114453	0.236885				ADAM22	304.551	-0.45847	0.190627	-2.40506	0.0161698	0.043577
ADAM23	1061.64	-0.181256	0.278914	-0.649862	0.515781	0.678925				ADAM23	1061.64	-0.498129	0.311421	-1.59953	0.109702	0.203344
ADAM28	1010	0.320172	0.168851	1.89619	0.0579356	0.142717				ADAM28	1010	-0.526854	0.187647	-2.80769	0.00498986	0.0167098
ADAM29	0.863727	0.602248	0.30304	1.98736	0.0468829	0.121682				ADAM29	0.749555	0.899398	0.325972	2.75913	0.00579556	0.0189159
ADAM30	0.0924337	0.0933335	1.07493	0.0868276	0.930809	0.967867				ADAM30	0.0924337	0.24649	1.20009	0.205393	0.837265	0.907085
ADAM32	55.013	-0.155197	0.138103	-1.12377	0.26111	0.427433				ADAM32	55.013	-0.278677	0.15418	-1.80748	0.0706874	0.143919
ADAM33	309.635	-0.454958	0.185436	-2.45345	0.0141492	0.049317				ADAM33	280.983	-0.218049	0.209422	-1.04119	0.297785	0.43813
ADAM7	0.491914	0.207335	0.435467	0.47612	0.633989	0.776187				ADAM7	0.491914	-0.698487	0.478304	-1.46034	0.144196	0.251733
ADAM8	3483.46	-0.0685394	0.147876	-0.463491	0.643012	0.783399				ADAM8	3483.46	0.466971	0.163475	2.85653	0.00428295	0.0146846
ADAM9	6873.9	-0.33589	0.0902581	-3.72144	0.000198091	0.00178384				ADAM9	6873.9	-0.249891	0.101822	-2.45421	0.0141196	0.0390424
ADAMDEC1	447.892	0.7606	0.213853	3.55666	0.000375603	0.00295749				ADAMDEC1	447.892	1.53638	0.231601	6.63371	3.27e-11	1.34e-09
ADAMTS1	1605.62	-0.48808	0.172691	-2.82631	0.00470871	0.0210231				ADAMTS1	1605.62	0.0825193	0.199175	0.414307	0.67865	0.791716
ADAMTS10	234.538	-0.571901	0.146182	-3.91225	9.14e-05	0.000972276				ADAMTS10	234.538	0.31613	0.167826	1.88368	0.0596083	0.125589
ADAMTS12	325.037	-0.732766	0.177837	-4.12043	3.78e-05	0.000486517				ADAMTS12	325.037	-0.245975	0.202165	-1.2167	0.223718	0.353446
ADAMTS13	191.84	-0.178723	0.138162	-1.29358	0.19581	0.347973				ADAMTS13	191.84	-0.115939	0.154368	-0.751054	0.45262	0.59739
ADAMTS14	254.887	-0.261414	0.156754	-1.66767	0.0953804	0.207002				ADAMTS14	254.887	-0.366953	0.174731	-2.10011	0.0357192	0.0831766
ADAMTS15	406.946	-0.60262	0.217443	-2.77139	0.0055817	0.0239908				ADAMTS15	406.946	0.102656	0.244108	0.420535	0.674095	0.788458
ADAMTS16	56.9097	-0.963404	0.224978	-4.28221	1.85e-05	0.000278126				ADAMTS16	56.9097	-0.40754	0.255825	-1.59305	0.11115	0.20535
ADAMTS17	318.564	0.296257	0.150477	1.96878	0.0489783	0.125502				ADAMTS17	318.564	-0.0665405	0.168665	-0.394513	0.693202	0.803336
ADAMTS18	21.7496	0.866767	0.27089	3.19971	0.00137567	0.00816017				ADAMTS18	26.5357	-1.31769	0.31452	-4.18952	2.8e-05	0.000215326
ADAMTS19	10.0292	-0.090172	0.335232	-0.268984	0.787942	0.884415				ADAMTS19	12.7523	0.0721032	0.396127	0.18202	0.855567	0.919098
ADAMTS2	1360.87	-0.45976	0.15105	-3.04376	0.00233638	0.0122241				ADAMTS2	1360.87	-0.00360004	0.171129	-0.0210371	0.983216	0.990365
ADAMTS20	4.55321	-0.658716	0.40698	-1.61855	0.105544	0.223134				ADAMTS20	5.22931	1.28592	0.463991	2.77143	0.00558109	0.0183143
ADAMTS3	56.4928	-0.718467	0.203575	-3.52925	0.000416746	0.00321456				ADAMTS3	56.4928	0.478283	0.231103	2.06956	0.0384931	0.0884934
ADAMTS4	731.444	-0.37953	0.154755	-2.45246	0.0141882	0.0494079				ADAMTS4	731.444	0.439304	0.173111	2.5377	0.0111585	0.032254
ADAMTS5	207.686	-0.780116	0.188786	-4.13228	3.59e-05	0.000468095				ADAMTS5	122.375	-0.195237	0.191475	-1.01965	0.307896	0.449752
ADAMTS6	90.3144	-0.757117	0.162721	-4.65286	3.27e-06	7.03e-05				ADAMTS6	90.3144	-0.18054	0.184891	-0.976468	0.328833	0.472146
ADAMTS7	466.398	-0.876159	0.157567	-5.56055	2.69e-08	1.56e-06				ADAMTS7	466.398	-0.0953088	0.182827	-0.521307	0.602153	0.730362
ADAMTS8	32.0151	-0.0312388	0.204194	-0.152986	0.878409	0.940124				ADAMTS8	31.9697	1.03397	0.226111	4.57286	4.81e-06	4.82e-05
ADAMTS9	483.466	-1.04411	0.179275	-5.82409	5.74e-09	4.57e-07				ADAMTS9	420.222	-0.215756	0.190641	-1.13174	0.257745	0.392935
ADAMTSL1	123.311	0.207901	0.203027	1.02401	0.305831	0.475859				ADAMTSL1	86.0489	-0.456303	0.190355	-2.39712	0.0165245	0.0444139
ADAMTSL2	285.948	-0.0170459	0.148747	-0.114596	0.908765	0.956863				ADAMTSL2	246.577	-0.0717356	0.141879	-0.505611	0.61313	0.739034
ADAMTSL3	382.964	-0.418029	0.204006	-2.0491	0.0404519	0.109016				ADAMTSL3	382.964	-0.538481	0.2272	-2.37008	0.0177845	0.0471441
ADAMTSL4	1570.57	-0.78683	0.209785	-3.75065	0.000176374	0.00162816				ADAMTSL4	1570.57	0.610218	0.235919	2.58656	0.00969402	0.0288516
ADAMTSL5	589.348	-0.182601	0.162655	-1.12263	0.261595	0.428035				ADAMTSL5	589.348	0.193274	0.181863	1.06275	0.287897	0.427762
ADAP1	817.435	0.127493	0.168931	0.754706	0.450425	0.621525				ADAP1	817.435	-0.0536225	0.190772	-0.281081	0.778648	0.868555
ADAP2	442.586	0.271799	0.112757	2.41049	0.0159312	0.0540406				ADAP2	442.586	0.937111	0.116701	8.03003	9.75e-16	1.11e-13
ADAR	20826.4	0.00775032	0.0597225	0.129772	0.896747	0.949449				ADAR	20826.4	0.133975	0.0662462	2.02239	0.0431363	0.0967367
ADARB1	799.527	-0.0124286	0.123322	-0.100781	0.919724	0.961834				ADARB1	742.487	0.464292	0.12062	3.84922	0.000118496	0.000723543
ADARB2	130.871	0.256839	0.293592	0.874816	0.381674	0.555104				ADARB2	130.871	-0.485141	0.327947	-1.47933	0.139053	0.244858
ADAT1	1009.87	-0.0496965	0.0599044	-0.829598	0.406766	0.581175				ADAT1	1009.87	-0.0760298	0.0672977	-1.12975	0.25858	0.393876
ADAT2	559.892	-0.103744	0.074699	-1.38883	0.164884	0.30841				ADAT2	559.892	0.0281638	0.0848549	0.331905	0.739961	0.839805
ADAT3	214.53	0.126108	0.114249	1.10379	0.269683	0.437525				ADAT3	214.53	0.00074725	0.127724	0.00585051	0.995332	0.997646
ADCK1	533.227	0.102842	0.0582242	1.76631	0.0773435	0.17719				ADCK1	533.227	0.139042	0.0648842	2.14293	0.0321186	0.0762811
ADCK2	1953.04	0.125895	0.0709566	1.77426	0.0760202	0.174871				ADCK2	1953.04	0.184915	0.0789697	2.3416	0.0192013	0.0501902
ADCK5	1003.51	0.0147315	0.0805297	0.182932	0.854851	0.924903				ADCK5	1003.51	0.249309	0.0889473	2.80289	0.00506473	0.0169102
ADCY1	225.152	-0.377281	0.187553	-2.0116	0.0442623	0.11667				ADCY1	225.152	0.684919	0.20798	3.2932	0.000990551	0.00432854
ADCY10	13.9516	0.830694	0.177808	4.67185	2.98e-06	6.54e-05				ADCY10	11.6466	0.241702	0.179819	1.34414	0.178904	0.297936
ADCY2	78.732	0.498306	0.266316	1.87111	0.0613304	0.148834				ADCY2	74.0889	-1.02944	0.289017	-3.56187	0.000368219	0.00188024
ADCY3	2605.44	-0.173027	0.0795171	-2.17597	0.0295572	0.0863368				ADCY3	2605.44	-0.00125799	0.0894702	-0.0140604	0.988782	0.993876
ADCY4	326.968	-0.0407348	0.121502	-0.335261	0.737428	0.851029				ADCY4	326.968	-0.0279574	0.14064	-0.198786	0.84243	0.910691
ADCY5	339.986	-0.215766	0.230273	-0.936999	0.348759	0.52172				ADCY5	339.986	-0.518391	0.258246	-2.00736	0.0447116	0.0995686
ADCY6	2731.17	-0.316638	0.0990793	-3.1958	0.00139442	0.00824833				ADCY6	2731.17	-0.419496	0.110092	-3.81039	0.000138745	0.00082814
ADCY7	634.229	-0.497498	0.138668	-3.5877	0.000333612	0.00270368				ADCY7	634.229	0.108318	0.157398	0.688179	0.49134	0.634157
ADCY8	1.06881	0.345175	0.334023	1.03339	0.301423	0.471186				ADCY8	1.06881	0.255855	0.370767	0.69007	0.49015	0.63324
ADCY9	1586.65	0.0325751	0.0865862	0.376215	0.706757	0.82808				ADCY9	1586.65	-0.0564015	0.0976302	-0.577705	0.563463	0.697778
ADCYAP1	17.9679	0.569403	0.254037	2.24142	0.0249987	0.0759574				ADCYAP1	17.9679	0.623765	0.286201	2.17947	0.029297	0.0707949
ADCYAP1R1	34.0925	-0.668013	0.231868	-2.881	0.00396413	0.0183992				ADCYAP1R1	31.9314	0.00727488	0.257483	0.0282538	0.97746	0.986542
ADD1	7833.9	-0.133528	0.0522385	-2.55612	0.0105845	0.0394994				ADD1	7833.9	-5.74e-05	0.0598467	-0.000958903	0.999235	0.99974
ADD2	302.868	-0.403358	0.252365	-1.59832	0.109973	0.229927				ADD2	302.868	-0.877143	0.27793	-3.15599	0.00159954	0.00643654
ADD3	4607.37	0.0391277	0.104372	0.374885	0.707746	0.82869				ADD3	4607.37	-0.368544	0.114855	-3.20877	0.00133303	0.0055438
ADGB	2.99075	0.750148	0.372871	2.01182	0.0442393	0.116625				ADGB	5.23506	-2.22147	0.439482	-5.05474	4.31e-07	6.1e-06
ADGRA1	21.8907	-0.207835	0.333432	-0.62332	0.533074	0.692974				ADGRA1	27.4785	-1.2429	0.381206	-3.26044	0.0011124	0.00476997
ADGRA2	757.524	-0.651496	0.154605	-4.21395	2.51e-05	0.000355828				ADGRA2	757.524	-0.0291109	0.181651	-0.160258	0.872678	0.929462
ADGRA3	1607.45	-0.219834	0.116922	-1.88018	0.0600842	0.146704				ADGRA3	1607.45	-0.520663	0.128324	-4.0574	4.96e-05	0.000347246
ADGRB1	98.0114	-0.892113	0.200586	-4.44755	8.69e-06	0.000152622				ADGRB1	86.8939	0.0168442	0.216721	0.077723	0.938048	0.964691
ADGRB2	562.467	0.153682	0.169689	0.905673	0.365109	0.537925				ADGRB2	562.467	-0.247414	0.189552	-1.30525	0.191807	0.314679
ADGRB3	7.6069	-1.57174	0.302841	-5.18996	2.1e-07	7.86e-06				ADGRB3	6.14234	-1.09128	0.330366	-3.30325	0.000955696	0.0041983
ADGRD1	57.3236	-0.041164	0.209208	-0.196761	0.844015	0.918638				ADGRD1	44.5171	-0.00842403	0.235813	-0.0357234	0.971503	0.984199
ADGRD2	103.774	-0.072303	0.244406	-0.295832	0.767358	0.86987				ADGRD2	103.774	0.265582	0.272804	0.973526	0.330292	0.47353
ADGRE1	63.9214	0.461205	0.204774	2.25226	0.024306	0.0744324				ADGRE1	63.9214	1.73122	0.215989	8.01531	1.1e-15	1.24e-13
ADGRE2	442.015	-0.403476	0.172679	-2.33657	0.0194617	0.0628707				ADGRE2	442.015	1.04925	0.186758	5.61822	1.93e-08	4.12e-07
ADGRE3	10.2379	0.0238954	0.183455	0.130252	0.896367	0.949381				ADGRE3	10.2379	0.241854	0.20463	1.18191	0.23724	0.369315
ADGRE5	3878.66	0.109669	0.126459	0.867229	0.385817	0.559724				ADGRE5	3878.66	0.276134	0.143117	1.92943	0.0536771	0.115472
ADGRF1	1742.51	-0.0433114	0.221369	-0.195652	0.844882	0.919164				ADGRF1	1742.51	-0.217945	0.246978	-0.882446	0.377536	0.522342
ADGRF2	33.3285	-0.923838	0.245417	-3.76436	0.000166973	0.00156787				ADGRF2	33.3285	-0.391131	0.278349	-1.40518	0.159967	0.273082
ADGRF3	63.6393	-0.0449156	0.103264	-0.434958	0.663593	0.79817				ADGRF3	63.6393	-0.343344	0.111799	-3.07108	0.00213287	0.00821272
ADGRF4	1239.27	-0.491101	0.209154	-2.34803	0.0188729	0.0614984				ADGRF4	1239.27	0.215882	0.235295	0.917495	0.358883	0.503606
ADGRF5	493.295	-0.602929	0.127705	-4.72126	2.34e-06	5.41e-05				ADGRF5	493.295	0.036348	0.148415	0.244908	0.806528	0.887385
ADGRG1	13298.7	-0.120441	0.0866881	-1.38937	0.164722	0.308145				ADGRG1	13298.7	-0.163956	0.0969401	-1.69131	0.0907776	0.175266
ADGRG2	153.92	-0.183682	0.245958	-0.746805	0.455181	0.625514				ADGRG2	183.379	-0.937533	0.284703	-3.29302	0.00099117	0.00433025
ADGRG3	117.178	-0.505309	0.175123	-2.88545	0.00390853	0.0182119				ADGRG3	117.178	0.518661	0.194415	2.6678	0.00763495	0.0236918
[truncated: 18,989 more rows]

## Sheet: Sheet5
Data5. Functional enrichment analysis of DEGs (OS and RFS)
[truncated: 792 more rows]

## Sheet: Sheet6
Data6. Immune related genes obtained from ImmPort database
[truncated: 2,484 more rows]

[truncated: 17 more sheets: Sheet7, Sheet8, Sheet9, Sheet10, Sheet11, Sheet12, Sheet13, Sheet14, Sheet15, Sheet16, Sheet17, Sheet18, Sheet19, Sheet20, Sheet21, Sheet22, Sheet23]
